# Supplementary material for: Molecular Diversity Analysis and Genetic Mapping of Pod Shatter Resistance Loci in Brassica carinata L
Source: Front Plant Sci. 2017 Nov 30;8:1765. doi: 10.3389/fpls.2017.01765 (PMC5716317; doi:10.3389/fpls.2017.01765)
Supplement: Supplementary file 4 [file Table_2.XLSX]

## Sheet: Sheet1
Supplemental Table 2. Genetic and physical mapping of DArTseq markers and their asociation with pod shatter resistance in an F2 Brassica carinata population derived from BC73524/BC73526
												Brassica juncea			B. oleracea (OCRI)			B. oleracea (T1000)			Brassica napus (Darmor)				B. nigra
Marker	Linkage Group	Chromosome	Genetic Map Position	P.value	log10 score	Number of observation	R2		DArTseq Marker Sequence	Chrom_dartclones-Brassica-20170717155823-17.REF	Alignment Evalue_dartclones-Brassica-20170717155823-17.REF	Chrom_Brassica_juncea_tumida_v1	ChromPos_Brassica_juncea_tumida_v1	AlnEvalue_Brassica_juncea_tumida_v1	Chrom_Brassica_v1_oleracea	ChromPos_Brassica_v1_oleracea	AlnEvalue_Brassica_v1_oleracea	Chrom_Brassica_oleracea_TO1000_v1	ChromPos_Brassica_oleracea_TO1000_v1	AlnEvalue_Brassica_oleracea_TO1000_v1	Chrom_Brassica_v41_napus	ChromPos_Brassica_v41_napus	AlnCnt_Brassica_v41_napus	AlnEvalue_Brassica_v41_napus	Chrom_Brassica_nigra_v1	ChromPos_Brassica_nigra_v1	AlnEvalue_Brassica_nigra_v1
5847261	1		0	0.407127	-0.39027	228	0.223256		TGCAGTAACACAGAGCAAAATCAATTTTACCAAACAGTTCAAAGACATCCCTAAGTTAC	5847261	4.58575e-25	LFQT01007632.1_Scaffold00186	43575	8.55153e-23		0	999		0	999		0	0	999		0	999
5843924	1		2.22222	0.483037	-0.316019	228	0.159776		TGCAGGATGTTCATACCCCTGTTTTAC		999		0	999		0	999		0	999		0	0	999		0	999
5859657	1		3.23597	0.103859	-0.983558	228	0.863163		TGCAGAGAACTAAAACCTGATTGGCCTAAAGCTTGTTTCAGAGAAGGTGCTGCTCTTCGTTTGCTACAG	5859657	1.52834e-30	LFQT01005784.1_Scaffold00255	111537	8.49476e-29	C1	42604222	9.61023e-26	NC_027748.1_chromosome_C1	42604222	9.61678e-26	chrC01	38373785	11	1.63784e-25	CM004491.1_chromosome_B1	29979317	3.6593e-29
5853237	1	B01	3.26029	0.132316	-0.878388	228	0.738495		TGCAGCTTGCACGAACTCCAGGTACTTCAACCTCTCCTTCTCCTCCTTAGTCTGCAAAAAATCGAAAAA	5853237	1.52834e-30	CM007195.1_chromosome_B1	815470	8.49476e-29	C1	42363288	2.71008e-16	NC_027748.1_chromosome_C1	42363288	2.71193e-16	chrAnn_random	2039813	1	4.61869e-16	CM004491.1_chromosome_B1	29847768	2.8489e-25
5853236|F|0--18:T>C	1	B01	3.26029	0.397795	-0.400341	228	0.232305		TGCAGCTTGCACGAACTCTAGGTACTTCAACCTCTCCTTCTCCTCCTTAGTCTGCAAAAATTCGGAAAA	5853236	1.52834e-30	CM007195.1_chromosome_B1	815470	8.55507e-24	C1	42363288	1.26088e-14	NC_027748.1_chromosome_C1	42363288	1.26174e-14	chrAnn_random	2039813	1	2.14887e-14	CM004491.1_chromosome_B1	29847768	1.32546e-23
5853236	1	B01	3.26029	0.723043	-0.140836	228	0.0407539		TGCAGCTTGCACGAACTCTAGGTACTTCAACCTCTCCTTCTCCTCCTTAGTCTGCAAAAATTCGGAAAA	5853236	1.52834e-30	CM007195.1_chromosome_B1	815470	8.55507e-24	C1	42363288	1.26088e-14	NC_027748.1_chromosome_C1	42363288	1.26174e-14	chrAnn_random	2039813	1	2.14887e-14	CM004491.1_chromosome_B1	29847768	1.32546e-23
5854483|F|0--68:T>A	1	B01	3.59698	0.27755	-0.556659	228	0.383479		TGCAGTAATTTTCAATCAACAAACGAAGAGCTGCATCGCCCACAACAACCTAGCAAAAGTAGAAAACAT	5854483	1.52834e-30	CM007195.1_chromosome_B1	653635	3.05526e-28		0	999		0	999		0	0	999	CM004491.1_chromosome_B1	29769771	1.31612e-28
5851044|F|0--11:G>A	1		3.59699	0.354845	-0.449961	228	0.278227		TGCAGATAACAGTGGTGTGACATTATCTTCAGTCTCAGCGTTGGGCTGCGAAGTCATTATAACAAACAA	5851044	1.52834e-30	LFQT01005784.1_Scaffold00255	110572	8.49476e-29		0	999		0	999		0	0	999	CM004491.1_chromosome_B1	29980282	3.6593e-29
5859658	1		3.59699	0.452583	-0.344302	228	0.183245		TGCAGAGAACTAAAACCTGATTGGCCTAAAGCTTGTTTCAGAGAAGGCGCTGCTCTTCGTTTACTACAG	5859658	1.52834e-30	CM007193.1_chromosome_A9	44090102	3.95223e-27	C1	42604222	4.47121e-24	NC_027748.1_chromosome_C1	42604222	4.47425e-24	chrA03	14005168	7	1.63784e-25	CM004491.1_chromosome_B1	29979317	7.921e-26
5857151|F|0--49:A>G	1		3.59699	0.474217	-0.324022	228	0.166322		TGCAGAGTTGAAGTAATGGCAGGCTCTTCTTTTTATTCCAATCTACATAAGTTAC	5857151	6.88654e-23		0	999		0	999		0	999		0	0	999		0	999
5859657|F|0--62:G>A	1		3.59699	0.578783	-0.237484	228	0.100049		TGCAGAGAACTAAAACCTGATTGGCCTAAAGCTTGTTTCAGAGAAGGTGCTGCTCTTCGTTTGCTACAG	5859657	1.52834e-30	LFQT01005784.1_Scaffold00255	111537	8.49476e-29	C1	42604222	9.61023e-26	NC_027748.1_chromosome_C1	42604222	9.61678e-26	chrC01	38373785	11	1.63784e-25	CM004491.1_chromosome_B1	29979317	3.6593e-29
5832853	1		4.27039	0.0844765	-1.07326	228	0.971993		TGCAGCTGTTAGCAATCTCCAGTCCATCGTGCGTCTCAAGAAGATCTGAGTGATGTAGATTCTTGATTA	5832853	1.52834e-30		0	999		0	999		0	999		0	0	999	CM004491.1_chromosome_B1	29995904	3.6593e-29
5854280	1		4.27039	0.110425	-0.956931	228	0.831284		TGCAGGTTAGGTTTGAAAACCTTCTTCTCTGCGCTTTCCACCGTCTGTTTATATAACCTACGTTACAGA	5854280	1.52834e-30		0	999		0	999		0	999		0	0	999	CM004491.1_chromosome_B1	30592456	6.12331e-27
5830578	1		4.27039	0.125038	-0.90296	228	0.767315		TGCAGACCTCTTTTACTCTCAGAAGCAAGAGGTAACATTACATTGCCAACTCAGTAACTCTCAATGTGC	5830578	1.52834e-30	LFQT01005784.1_Scaffold00255	91365	8.49476e-29	C1	42625169	1.64263e-08	NC_027748.1_chromosome_C1	42625169	1.64375e-08	chrC01	38393119	1	6.01707e-10		0	999
5832854	1		4.27039	0.200521	-0.697841	228	0.533482		TGCAGCTGTTATTAGTCCTTACAGGTGATTGATTACTCTTTGTTTGTTTGTTATGTGCTAATCTCTTTA	5832854	1.52834e-30	LFQT01007632.1_Scaffold00186	47850	8.55507e-24		0	999		0	999		0	0	999	CM004491.1_chromosome_B1	30619395	3.6593e-29
5841936	1		4.27039	0.219958	-0.65766	228	0.48973		TGCAGACAGATTCAGTCTTTATTTGCTTGAAACTATATATGGTTGAAGAAGTTTAC	5841936	1.96942e-23	LFQT01000269.1_Scaffold00262	90557	2.19874e-13		0	999		0	999		0	0	999	CM004491.1_chromosome_B1	30481445	1.57722e-21
5860182|F|0--63:G>C	1		4.27039	0.569964	-0.244152	228	0.104771		TGCAGCAGCGACTTGCGACTGCGATAGAGAGACCGAAGCTGCCACGGCTGAAATCAAACCAATGGCACA	5860182	1.52834e-30	LFQT01007632.1_Scaffold00186	51755	1.83879e-25		0	999		0	999		0	0	999	CM004491.1_chromosome_B1	30615492	7.921e-26
5834188	1		4.60709	0.145644	-0.836708	228	0.690072		TGCAGTCAAGGTAATAAAACATATACTTGTGTTAGGATACTAAGTTTGATAGGGATGATGCTAATGTTA	5834188	1.52834e-30		0	999		0	999		0	999		0	0	999		0	999
5845257	1		4.60709	0.34162	-0.466457	228	0.293953		TGCAGAAAACATGAACGTTTTTTTTTTGAGAAAACAAGAAAGTTAC		999		0	999		0	999		0	999		0	0	999		0	999
5855710|F|0--23:G>T	1	B01	4.60709	0.607585	-0.216393	228	0.0855952		TGCAGTTTTGTGAGATTTTCTTCGATGGCTTTTAGTACATGTTTTGGAATCTTGTCTTTATTAC	5855710	8.59634e-28	CM007195.1_chromosome_B1	648446	7.58291e-24		0	999		0	999		0	0	999	CM004491.1_chromosome_B1	29764526	3.27581e-24
5862382|F|0--15:T>C	1	B01	4.60709	0.65829	-0.181583	228	0.0634818		TGCAGCTTTTGGAAATCACTTCAAGCGAGTTTGATGTGACACTTAC	5862382	5.15204e-18	CM007195.1_chromosome_B1	648507	4.33853e-14	C1	42239591	2.23281e-09	NC_027748.1_chromosome_C1	42239591	2.23433e-09		0	0	999	CM004491.1_chromosome_B1	29764587	1.91044e-14
5836707	1		4.60709	0.730895	-0.136145	228	0.0383832		TGCAGTGCAAAATATGAAGAGAGCATCATGCCTGAGTATATGTCCGAACTTGATCTCTCCAGAGTGAAG	5836707	1.52834e-30	CM007185.1_chromosome_A1	41903457	3.98029e-22	C1	42238621	1.60813e-23	NC_027748.1_chromosome_C1	42238621	1.60923e-23		0	0	999	CM004491.1_chromosome_B1	29763738	3.71145e-19
5847936	1		6.29627	0.453484	-0.343438	228	0.182514		TGCAGATGGGAGAAAATGAATCATTGGTTACATTAC	5847936	1.24354e-12		0	999		0	999		0	999		0	0	999		0	999
5863424|F|0--25:T>C	1		8.64749	0.632313	-0.199068	228	0.0743035		TGCAGGGTGCGCTCTCTTCGTATAATCAGAGCTTCAGCATGAGAACTGTTCATCTCCTCATGTATCTCT	5863424	1.52834e-30	CM007187.1_chromosome_A3	507124	3.95223e-27	C1	40879411	2.672e-26	NC_027748.1_chromosome_C1	40879411	2.67382e-26	chrA01	21562310	2	4.5538e-26		0	999
5852850	1		9.09642	0.300175	-0.522625	228	0.34904		TGCAGCTAGCTCTTGACTAGGTTGTGTGTTTATGTTGATCTTGAACATTTTTTGCTACTAAGAATTTGT	5852850	1.52834e-30	CM007187.1_chromosome_A3	527842	3.0988e-18		0	999		0	999		0	0	999	CM004491.1_chromosome_B1	28877180	6.21056e-17
5844201	1		9.09642	0.442758	-0.353833	228	0.191359		TGCAGGTCTGGCCTTGAGTTTTTGTTAC	5844201	1.84344e-08		0	999		0	999		0	999		0	0	999		0	999
5859573	1		9.09642	0.46136	-0.33596	228	0.176226		TGCAGACCCATAACCTTCATGTGCTGAATTCGGAGCCTTCTTTCCCCAGCCTTGGCGAATTAGATCAGC	5859573	1.52834e-30	CM007187.1_chromosome_A3	520816	3.95223e-27	C1	40856127	2.08025e-22	NC_027748.1_chromosome_C1	40856127	2.08167e-22	chrA01	21546546	2	3.5453e-22	CM004491.1_chromosome_B1	28884331	3.6593e-29
5863424	1		9.09642	0.947354	-0.0234876	228	0.00141434		TGCAGGGTGCGCTCTCTTCGTATAATCAGAGCTTCAGCATGAGAACTGTTCATCTCCTCATGTATCTCT	5863424	1.52834e-30	CM007187.1_chromosome_A3	507124	3.95223e-27	C1	40879411	2.672e-26	NC_027748.1_chromosome_C1	40879411	2.67382e-26	chrA01	21562310	2	4.5538e-26		0	999
5839458	1		9.32089	0.241679	-0.616762	228	0.446027		TGCAGAGTTCATTTTTCTTTCAAGTTTAGATGCATTTCACCATACTCTCTTTGATTCTTTGCAGGTATC	5839458	1.52834e-30		0	999		0	999		0	999		0	0	999		0	999
5859574	1		9.32089	0.290745	-0.536488	228	0.362977		TGCAGACCCATAACCTTCATGTGCTGAATTCGGAGCTTTCTTTCCCCAGCCTTGGCGAACTAGATCAGC	5859574	1.52834e-30	CM007187.1_chromosome_A3	520816	3.95223e-27		0	999		0	999		0	0	999	CM004491.1_chromosome_B1	28884331	7.921e-26
5859574|F|0--36:T>C	1		9.32089	0.330289	-0.481106	228	0.308096		TGCAGACCCATAACCTTCATGTGCTGAATTCGGAGCTTTCTTTCCCCAGCCTTGGCGAACTAGATCAGC	5859574	1.52834e-30	CM007187.1_chromosome_A3	520816	3.95223e-27		0	999		0	999		0	0	999	CM004491.1_chromosome_B1	28884331	7.921e-26
5839425	1		9.32089	0.532811	-0.273427	228	0.126308		TGCAGAAAGAATCACATTGGCAAGAGACATTGACATGTATATCATCTTCCTTCTTCTGCTGCGGTTCCA	5839425	1.52834e-30	CM007187.1_chromosome_A3	516873	3.95223e-27		0	999		0	999		0	0	999	CM004491.1_chromosome_B1	28888306	1.70251e-27
5863425	1		9.32089	0.575473	-0.239975	228	0.101805		TGCAGGGTGCGCTCTCTTCGTATAACCAGAGCTTCAGCATGAGGACTGTTCATCTCCTCATGTATCTCT	5863425	1.52834e-30	CM007187.1_chromosome_A3	507124	3.95223e-27		0	999		0	999		0	0	999	CM004491.1_chromosome_B1	28897494	7.921e-26
5852851	1		9.32089	0.57596	-0.239608	228	0.101545		TGCAGCTAGCTCTTGACTAGGTTGTGTGTTTATGTTGATCTTCAACATTTTTTGCTAGTAAGAATTTGT	5852851	1.52834e-30	CM007187.1_chromosome_A3	527842	1.44173e-16		0	999		0	999		0	0	999	CM004491.1_chromosome_B1	28877180	2.88949e-15
5852850|F|0--42:G>C	1		9.32089	0.805075	-0.0941639	228	0.0197592		TGCAGCTAGCTCTTGACTAGGTTGTGTGTTTATGTTGATCTTGAACATTTTTTGCTACTAAGAATTTGT	5852850	1.52834e-30	CM007187.1_chromosome_A3	527842	3.0988e-18		0	999		0	999		0	0	999	CM004491.1_chromosome_B1	28877180	6.21056e-17
5831052	1		9.32316	0.937966	-0.0278127	228	0.00196485		TGCAGAGTTCATTTTTTTCCAAGTTTAGAATATGCATTTCACCACACTCTCTTTGATTCTTCGGTTTAC	5831052	1.52834e-30	CM007187.1_chromosome_A3	511803	1.42147e-26		0	999		0	999		0	0	999	CM004491.1_chromosome_B1	28892915	2.20233e-26
5861570	1		9.65759	0.778741	-0.108607	228	0.0256117		TGCAGTGTTCCCGTTGTCAAAATACCTGGCTTTGGATCGGTCTGATTGCTCTCAGTACTTTCTCGCTTT	5861570	1.52834e-30	CM007202.1_chromosome_B8	73124885	8.49476e-29		0	999		0	999		0	0	999	CM004497.1_chromosome_B7	36204195	7.921e-26
5845010	1	B01	11.7041	0.712755	-0.14706	228	0.043982		TGCAGTTCGCTTTGCTGGAGCAAATGCATTCAGTGCCAGAAGTTAC	5845010	5.15204e-18	CM007195.1_chromosome_B1	3577996	9.32507e-16	C1	40342456	1.0315e-12	NC_027748.1_chromosome_C1	40342456	1.03221e-12	chrA01	21079754	1	2.32574e-11		0	999
5852392|F|0--35:G>T	1	B01	12.0145	0.546254	-0.262606	228	0.118198		TGCAGCCCTTCTCTCTCGTGCACTCCAAATGTGTCGAGCTAAGCAGGTTACACATCAATTCAATTACAG	5852392	1.52834e-30	CM007195.1_chromosome_B1	3736745	8.55507e-24		0	999		0	999		0	0	999	CM004491.1_chromosome_B1	28080374	1.71459e-22
5857062|F|0--19:T>G	1	B01	12.0145	0.593165	-0.226825	228	0.0926504		TGCAGAGCAAACCATAACATTAGCTTAGAAGCATCACTAAGCTGGCTTTAC	5857062	1.02066e-20	CM007195.1_chromosome_B1	3718549	1.83111e-18		0	999		0	999		0	0	999	CM004491.1_chromosome_B1	28097365	8.00924e-19
5858707	1		12.0145	0.62831	-0.201826	228	0.0760647		TGCAGTCACCGCAAAATAATCCTGGTGTCAATAATCCACCTCTTAC	5858707	5.15204e-18	CM007185.1_chromosome_A1	40928678	9.39128e-11	C1	40074774	1.0315e-12	NC_027748.1_chromosome_C1	40074774	1.03221e-12		0	0	999		0	999
5852392	1	B01	12.0145	0.818198	-0.0871416	228	0.0171421		TGCAGCCCTTCTCTCTCGTGCACTCCAAATGTGTCGAGCTAAGCAGGTTACACATCAATTCAATTACAG	5852392	1.52834e-30	CM007195.1_chromosome_B1	3736745	8.55507e-24		0	999		0	999		0	0	999	CM004491.1_chromosome_B1	28080374	1.71459e-22
5840341	1		12.0145	0.827392	-0.0822888	228	0.0154249		TGCAGAGACACCAAATTTGACAGTACATGAAGTGAGAAAATAAGACTTACATAGCAAACATTAC	5840341	8.59634e-28	CM007185.1_chromosome_A1	40928617	2.74666e-18		0	999		0	999		0	0	999		0	999
5864842	1	B01	12.0145	0.847382	-0.0719209	228	0.0120169		TGCAGGTTCCTGGTGGCAACATGCGAGACTCTTTCCTAGTTGATGGTGTGGCTTTCAAAAAGACGTTCT	5864842	1.52834e-30	CM007195.1_chromosome_B1	3718597	3.95223e-27	C3	24774532	9.61023e-26	NC_027750.1_chromosome_C3	24774532	9.61678e-26	chrC03_random	1578937	2	1.63784e-25	CM004491.1_chromosome_B1	28097299	1.70251e-27
5856572	1		12.0443	0.431853	-0.364664	228	0.200697		TGCAGAAAATGAACCTCTAGAACTCGTTGGATTGGAGTCGTCTCTGATTAC	5856572	1.02066e-20		0	999		0	999		0	999		0	0	999		0	999
5860630	1	B01	12.0443	0.504058	-0.297519	228	0.144947		TGCAGCTGCAATCAGTGGCTTACACATCTAAACAGGTATGTTTCGATTACATAACATATCCTGCACATA	5860630	1.52834e-30	CM007195.1_chromosome_B1	3603723	1.83879e-25	C1	40276379	7.48191e-22	NC_027748.1_chromosome_C1	40276379	7.48701e-22	chrCnn_random	48852668	1	2.74068e-23	CM004491.1_chromosome_B1	28190384	3.68528e-24
5832768	1		12.4634	0.3851	-0.414426	228	0.245119		TGCAGCTGATTTGTCAATGAGAACTGTAAACCAAAGCTCCTGATGGTCATGCAGGGCCGGCTTAC	5832768	2.44442e-28		0	999		0	999		0	999		0	0	999		0	999
5862545	1	B01	12.4634	0.405893	-0.391589	228	0.224435		TGCAGTAAATTTCTGTTTCCTATACACAGACGGGTGAGCGTCCTTCCTGTAATCTGTTAC	5862545	1.3077e-25	CM007195.1_chromosome_B1	3798429	1.13875e-21		0	999		0	999	chrCnn_random	76920167	2	2.21115e-13	CM004491.1_chromosome_B1	28356464	4.93342e-22
5852393	1	B01	12.4634	0.560074	-0.251755	228	0.11024		TGCAGCCCTTCTCTCTCGTGCACTCCAAATGTGTCTAGCCAAGCAGGTTACACATCAATTCTATTACAG	5852393	1.52834e-30	CM007195.1_chromosome_B1	3736745	1.83879e-25		0	999		0	999		0	0	999	CM004491.1_chromosome_B1	28080374	1.70251e-27
19818792	1		13.0246	0.405717	-0.391777	228	0.224603		TGCAGCTGCTGATGCGAGACTTTTTTGCGTATGATATATCTTCTGCCAACGGTGTTCTAGTTGATCCTT	19818792	1.52834e-30		0	999		0	999		0	999		0	0	999		0	999
5862545|F|0--24:C>A	1	B01	13.3613	0.464226	-0.33327	228	0.17398		TGCAGTAAATTTCTGTTTCCTATACACAGACGGGTGAGCGTCCTTCCTGTAATCTGTTAC	5862545	1.3077e-25	CM007195.1_chromosome_B1	3798429	1.13875e-21		0	999		0	999	chrCnn_random	76920167	2	2.21115e-13	CM004491.1_chromosome_B1	28356464	4.93342e-22
5850881|F|0--39:G>A	1	B01	14.0347	0.308066	-0.511356	228	0.337807		TGCAGAGGTATTCGACATTCAGAGCGTTATTCTTTACCCGAAAAGACACACACCAGGAAAAAGTAATGA	5850881	1.52834e-30	CM007195.1_chromosome_B1	3830979	5.11253e-26	C1	39940591	2.09502e-17	NC_027748.1_chromosome_C1	39940591	2.09645e-17	chrCnn_random	21448877	1	4.61869e-16	CM004491.1_chromosome_B1	27991760	2.20233e-26
5858149	1		14.0347	0.368714	-0.43331	228	0.262579		TGCAGGCCTGCGAATTGCTGAGGAACCCTTGTCTACAACCTTACCTCCTTAC	5858149	2.92937e-21		0	999		0	999		0	999		0	0	999		0	999
5846611	1	B01	14.3714	0.155845	-0.807308	228	0.656286		TGCAGGACTTTTTCAATGGGAAGGAGCTTTGTAAGAGTATTAC	5846611	2.12043e-16	CM007195.1_chromosome_B1	3950353	3.74692e-14	C8	21406379	2.02997e-09	NC_027755.1_chromosome_C8	21406379	2.03135e-09	chrC08	20685987	3	3.36109e-09	CM004491.1_chromosome_B1	27928054	7.72906e-13
5845929	1	B01	15.0448	0.131257	-0.881879	228	0.742578		TGCAGGCTTCCATTTGAAGACACGCAGAGGAGAAGAGAAACAATACAAGTTTGGTTAC	5845929	1.60704e-24	CM007195.1_chromosome_B1	4011601	3.86162e-21	C1	39697117	2.03318e-21	NC_027748.1_chromosome_C1	39697117	2.03457e-21		0	0	999	CM004491.1_chromosome_B1	27861078	1.29547e-22
5849808	1		15.0448	0.234441	-0.629966	228	0.460041		TGCAGAAGAAGTAGCTCTCCTTCTCCGTATTCCTCGAGCCTTCAAACAAACACACCTCTAATCAGCAGC	5849808	1.52834e-30	CM007194.1_chromosome_A10	20887273	1.85185e-20	C1	39565865	9.61023e-26	NC_027748.1_chromosome_C1	39565865	9.61678e-26	chrC01	37287737	3	7.62012e-24	CM004491.1_chromosome_B1	27815862	1.70251e-27
5843079	1	B01	15.0505	0.961154	-0.0172071	228	0.00076955		TGCAGCATCGTTTTGTGGATGACCCCAAAAGAGTTAC	5843079	3.6609e-13	CM007195.1_chromosome_B1	3975941	2.58188e-09		0	999		0	999		0	0	999	CM004496.1_chromosome_B6	27533042	2.51719e-11
5854412|F|0--48:A>G	1		15.3826	0.721803	-0.141581	228	0.0411357		TGCAGTAAATAGGGTTGATAGTAGGTGGATGTCGATGAGAAGAACAGCAATCTCTAAATGTCTTCCTCT	5854412	1.52834e-30		0	999		0	999		0	999		0	0	999	CM004491.1_chromosome_B1	27785468	3.6593e-29
5843607	1	B01	15.7285	0.355687	-0.448932	228	0.277253		TGCAGCTGTGTTATTTCATGTACAAGTATAACTAAATTAC	5843607	8.57861e-15	CM007195.1_chromosome_B1	4009510	6.83002e-11		0	999		0	999		0	0	999		0	999
5837073	1	B01	16.4087	0.455997	-0.341038	228	0.180489		TGCAGAGAGAGACCAAAACCTTGTCATGTTCAATACCGACCATGAAGAGAAAACAAAATTTGTTACAGA	5837073	1.52834e-30	CM007195.1_chromosome_B1	4098407	1.865e-15	C1	39499081	1.25199e-19	NC_027748.1_chromosome_C1	39499081	1.25284e-19	chrC01	37226863	1	2.13372e-19	CM004491.1_chromosome_B1	27773715	1.33487e-18
5857133|F|0--20:C>G	1		18.0979	0.153261	-0.814568	228	0.664599		TGCAGAGTCAACGGTTTGCACATGAACTCACAAACACAAATAAGTCCTTAC	5857133	1.02066e-20		0	999		0	999		0	999		0	0	999		0	999
5849577|F|0--30:T>C	1	B01	18.0979	0.154725	-0.81044	228	0.659871		TGCAGAAAGCAAGAATGTTGCTTCTGCTGCTGGTGTGGCAAAGGGAAGCAATGGACCAGCTCCAGTGAA	5849577	1.52834e-30	CM007195.1_chromosome_B1	1543219	8.49476e-29		0	999		0	999		0	0	999	CM004491.1_chromosome_B1	27591491	1.70251e-27
5849577	1	B01	18.0979	0.177115	-0.751744	228	0.593331		TGCAGAAAGCAAGAATGTTGCTTCTGCTGCTGGTGTGGCAAAGGGAAGCAATGGACCAGCTCCAGTGAA	5849577	1.52834e-30	CM007195.1_chromosome_B1	1543219	8.49476e-29		0	999		0	999		0	0	999	CM004491.1_chromosome_B1	27591491	1.70251e-27
5857160|F|0--23:G>A	1		18.0979	0.243298	-0.613861	228	0.44296		TGCAGAGTTTTTCAAATCAATCAGTTCGTTCCCCTGCCACATGGGATAATCGATTTTAC	5857160	4.58575e-25		0	999		0	999		0	999		0	0	999	CM004491.1_chromosome_B1	27590564	1.72509e-21
5849578	1	B01	18.0979	0.281087	-0.551159	228	0.377862		TGCAGAAAGCAAGAATGTTGCTTCTGCTGCCGGTGTGGCAAAGGGAAGCAATGGACCTGCTCCAGTGAA	5849578	1.52834e-30	CM007195.1_chromosome_B1	1543219	1.83879e-25		0	999		0	999		0	0	999		0	999
5843750	1	B01	18.0979	0.282044	-0.549684	228	0.376359		TGCAGGAACCATCAAGTGAGAACCTGTGTTATCTTAC	5843750	3.6609e-13	CM007195.1_chromosome_B1	1564229	5.54939e-11		0	999		0	999		0	0	999	CM004491.1_chromosome_B1	27574740	2.51719e-11
5839806	1	B01	18.0979	0.28597	-0.54368	228	0.370257		TGCAGGAGAACAAGAATGTGAATATTAGTATTCTCAGCACAGCAAAGAAGATGAAATATTAC	5839806	1.06146e-26	CM007195.1_chromosome_B1	1508537	2.00021e-24		0	999		0	999		0	0	999	CM004491.1_chromosome_B1	27614802	8.65256e-25
5833170	1	B01	18.4346	0.022693	-1.64411	228	1.70374		TGCAGGAGAACAAAGAATGTGAATATTAGTATTCTCAGCACAGCAGAGAAGATGAAATATTAC	5833170	3.02152e-27	CM007195.1_chromosome_B1	1508537	4.44672e-21		0	999		0	999		0	0	999	CM004491.1_chromosome_B1	27614801	1.92224e-21
5852500	1		18.4346	0.057563	-1.23986	228	1.17925		TGCAGCCTGTCTTTCGTTGGTAGTCTATTGAGGGTTGCTACCCACGAAAGAAAGGCATGTTTAGGAATT	5852500	1.52834e-30		0	999		0	999		0	999		0	0	999		0	999
5864030	1	B01	18.4346	0.121677	-0.914793	228	0.781263		TGCAGTTACTGTCTTCTGATGTTTCTTCGAAAAGGAATTCGGAACCTTCCCTTGTTAC	5864030	1.60704e-24	CM007195.1_chromosome_B1	1508482	1.38889e-20	C1	39313231	3.40223e-19	NC_027748.1_chromosome_C1	39313231	3.40455e-19	chrC01_random	4362114	2	5.75567e-19	CM004491.1_chromosome_B1	27614861	1.29547e-22
5864030|F|0--28:G>C	1	B01	18.4346	0.13165	-0.880578	228	0.741055		TGCAGTTACTGTCTTCTGATGTTTCTTCGAAAAGGAATTCGGAACCTTCCCTTGTTAC	5864030	1.60704e-24	CM007195.1_chromosome_B1	1508482	1.38889e-20	C1	39313231	3.40223e-19	NC_027748.1_chromosome_C1	39313231	3.40455e-19	chrC01_random	4362114	2	5.75567e-19	CM004491.1_chromosome_B1	27614861	1.29547e-22
5849405	1	B01	18.4346	0.2513	-0.599807	228	0.428171		TGCAGTCACGTGGGAATATCTAAGGCCAAAATCAGAGAAGAAACCTTGGGTGGATTGCGTATGGTTCAA	5849405	1.52834e-30	CM007195.1_chromosome_B1	1487420	3.95223e-27		0	999		0	999		0	0	999	CM004491.1_chromosome_B1	27652033	1.70251e-27
5857993|F|0--21:G>A	1		19.7814	0.19235	-0.715908	228	0.5534		TGCAGCTTGTGTTTTAGATTCGAAAATGATGGTCTGGGAGATTAC	5857993	1.78173e-17	CM007185.1_chromosome_A1	18546441	4.17073e-09		0	999		0	999	chrC01	36589286	2	7.98463e-11		0	999
5857992	1		19.7814	0.198848	-0.701478	228	0.537479		TGCAGCTTGTGTTTTAGATTCAAAAATGATGGTCGGGGAGATTAC	5857992	1.78173e-17	CM007185.1_chromosome_A1	40549648	3.20144e-15		0	999		0	999		0	0	999	CM004491.1_chromosome_B1	27456023	6.57242e-14
5858538|F|0--18:C>T	1	B01	19.7814	0.257961	-0.588446	228	0.416297		TGCAGTCCATCTGCATATCATAATCACCAACAACATTTTAC	5858538	2.50443e-15	CM007195.1_chromosome_B1	1642159	4.33674e-13	C1	38982004	1.41233e-10	NC_027748.1_chromosome_C1	38982004	1.4133e-10	chrC05_random	1268315	3	2.32478e-10	CM004491.1_chromosome_B1	27492508	1.93407e-13
5849887|F|0--6:A>C	1	B01	19.7814	0.344815	-0.462414	228	0.290079		TGCAGAAGCAGATACAATTATAAATTTTCCTACCGTGCATATGAAGAACAAGCTACCCATCTGGATCAA	5849887	1.52834e-30	CM007195.1_chromosome_B1	1642093	8.49476e-29		0	999		0	999		0	0	999	CM004491.1_chromosome_B1	27492546	3.6593e-29
5857993	1		19.7814	0.438104	-0.358422	228	0.1953		TGCAGCTTGTGTTTTAGATTCGAAAATGATGGTCTGGGAGATTAC	5857993	1.78173e-17	CM007185.1_chromosome_A1	18546441	4.17073e-09		0	999		0	999	chrC01	36589286	2	7.98463e-11		0	999
5852847|F|0--8:G>C	1		20.4548	0.236303	-0.626531	228	0.456386		TGCAGCTAGATTCTGAAAGCCACCGTCATACATGGCTTCAGTGGCTCCAGCTCCATTGATTCCATGAGC	5852847	1.52834e-30	CM007185.1_chromosome_A1	18424514	3.95223e-27		0	999		0	999		0	0	999	CM004491.1_chromosome_B1	27349142	3.6593e-29
5842261	1		20.4548	0.297789	-0.526091	228	0.352512		TGCAGAGGATGGTAAAGAGCCATTAC		999		0	999		0	999		0	999		0	0	999		0	999
5865139	1		21.1282	0.188984	-0.723575	228	0.561897		TGCAGGCCAATGACTCTGGCTTGGCTTCATACGTTGCTGGCCAAATTGACCGTACCTTAC	5865139	1.3077e-25	LFQT01000766.1_Scaffold00201	74629	2.44758e-23	C1	38409137	2.78479e-20	NC_027748.1_chromosome_C1	38409137	2.78669e-20	chrC01	36081997	14	4.71906e-20	CM004491.1_chromosome_B1	27188348	1.06037e-23
5851797	1		21.1282	0.369675	-0.43218	228	0.261525		TGCAGCAAGTGAGAACACCACTGGTCTTCCAATCTGATATTTAGAGGGCAGAAAAAGATAATGTGTTAC	5851797	1.52834e-30	LFQT01006804.1_Scaffold00894	15903	2.41252e-14		0	999		0	999	chrC05	37802242	2	2.14887e-14		0	999
5850945|F|0--49:G>A	1		21.8016	0.151781	-0.818783	228	0.669436		TGCAGAGTCTAATAAGCTTCACATGTACCTATGAGATCAAAGAGAACTCGGAGAAAGAGAGTACCTATT	5850945	1.52834e-30	CM007185.1_chromosome_A1	40340861	2.37863e-24	C1	38593372	4.47121e-24	NC_027748.1_chromosome_C1	38593372	4.47425e-24	chrC01	36292990	2	1.63784e-25	CM004491.1_chromosome_B1	27266658	7.921e-26
5846429	1		21.8016	0.499077	-0.301832	228	0.148366		TGCAGATAACCTCTAGGGTAGGCCATGTGAAGTATGTAGCAGCAACTTATAGTTAC	5846429	1.96942e-23		0	999		0	999		0	999		0	0	999		0	999
5860163	1		22.1383	0.47453	-0.323737	228	0.166086		TGCAGCAGCAACACAAGAAACAGTGAAAATTGCAACTCAATGGTGTATAATTAGGAATTTCATGGGATC	5860163	1.52834e-30		0	999		0	999		0	999		0	0	999	CM004491.1_chromosome_B1	27111203	3.6593e-29
5860163|F|0--21:A>C	1		22.475	0.23853	-0.622457	228	0.452059		TGCAGCAGCAACACAAGAAACAGTGAAAATTGCAACTCAATGGTGTATAATTAGGAATTTCATGGGATC	5860163	1.52834e-30		0	999		0	999		0	999		0	0	999	CM004491.1_chromosome_B1	27111203	3.6593e-29
5860164	1	B01	22.475	0.260412	-0.584339	228	0.412023		TGCAGCAGCAACACAAGAAACCATGAAAATTGCAACTCAATGGTGTATAATTAGGAATTTCATGGGATC	5860164	1.52834e-30	CM007195.1_chromosome_B1	4307385	2.37863e-24		0	999		0	999		0	0	999	CM004491.1_chromosome_B1	27111203	7.921e-26
5833287	1		22.475	0.435775	-0.360737	228	0.197297		TGCAGGATGATCTCGTTTGATTCATCCATCGTATCACAAAAAAAAAACTCCCTCCTGCACCAAAACAAT	5833287	1.52834e-30	CM007195.1_chromosome_B1	4312260	1.44173e-16		0	999		0	999		0	0	999	CM004491.1_chromosome_B1	27106320	4.80106e-18
5844545	1		22.475	0.621474	-0.206577	228	0.0791307		TGCAGTCAAATGCTCTACAATTGAGTTAC	5844545	5.69496e-09		0	999		0	999		0	999		0	0	999	CM004491.1_chromosome_B1	27077902	3.52423e-07
5846477	1	B01	22.8117	0.161618	-0.791511	228	0.638265		TGCAGATTTTGAAATAATCCTGATTCTGGTTCTTGATAAGGTTACACAAAGTTAC	5846477	6.88654e-23	CM007195.1_chromosome_B1	4377722	1.26262e-20		0	999		0	999		0	0	999	CM004491.1_chromosome_B1	27063310	2.57493e-14
5846607	1	B01	22.8117	0.189066	-0.723388	228	0.561688		TGCAGGACATTTCTCAATCTCCACCTATTGAAACATCACAAATAAGTTTTACTTAC	5846607	1.96942e-23	CM007195.1_chromosome_B1	4376561	3.62758e-21		0	999		0	999		0	0	999	CM004491.1_chromosome_B1	27064472	1.57722e-21
5863909|F|0--12:G>A	1		22.8117	0.232452	-0.633666	228	0.463984		TGCAGCTGTTTCGAGACTCTTCTCTCTAGACTGGTACAAAAACCGTATTAC	5863909	1.02066e-20	CM007194.1_chromosome_A10	14404428	6.58583e-18		0	999		0	999		0	0	999	CM004495.1_chromosome_B5	4712057	1.34023e-16
5865290|F|0--57:A>T	1	B01	22.8117	0.244499	-0.611722	228	0.440702		TGCAGAGCTCTCATCAACGAAATCACCCTTCTTGAGCTTCTTGATCCTGCGGCGGTAAGCAATCTGGAC	5865290	1.52834e-30	CM007195.1_chromosome_B1	4372404	8.49476e-29	C1	38045187	9.61023e-26	NC_027748.1_chromosome_C1	38045187	9.61678e-26	chrC01	35748836	2	1.63784e-25	CM004491.1_chromosome_B1	27068721	3.6593e-29
5863910	1	B01	22.8117	0.259117	-0.586503	228	0.414274		TGCAGCTGTTTCAAGACTCTTTTCTCTAGACTGGTACAAAAACCGTATTAC	5863910	1.02066e-20	CM007195.1_chromosome_B1	4374296	1.83111e-18		0	999		0	999		0	0	999	CM004491.1_chromosome_B1	27066757	8.00924e-19
5842744	1	B01	22.8117	0.49518	-0.305237	228	0.151081		TGCAGATTTTGAAATAATCCTGATTCTGATTATTGATAAAGGTTACACAAAATTAC	5842744	1.96942e-23	CM007195.1_chromosome_B1	4377722	6.11333e-14		0	999		0	999		0	0	999	CM004491.1_chromosome_B1	27063309	1.57722e-21
5839178	1	B01	23.1496	0.789689	-0.102544	228	0.02308		TGCAGTCCCTTTTCATGCGGTTCATACAATGCTAGAGAAAGGTTTGTCTTCTCTCTACAGCTTTTGCTA	5839178	1.52834e-30	CM007195.1_chromosome_B1	4444303	1.83879e-25		0	999		0	999		0	0	999	CM004491.1_chromosome_B1	26997557	3.71145e-19
5861303|F|0--35:T>C	1	B01	24.5009	0.302083	-0.519873	228	0.346289		TGCAGTATACTCGCTAGCAAGTGAAGCCTAATGCATAAGAAAGAGACCAAACAACAGGTCGGAAAAAGG	5861303	1.52834e-30	CM007195.1_chromosome_B1	6615281	3.95223e-27	C3	26555056	3.48099e-20	NC_027750.1_chromosome_C3	26555056	3.48337e-20	chrA01	19823638	3	1.27512e-21	CM004491.1_chromosome_B1	26820961	1.70251e-27
5829941	1	B01	24.5009	0.3901	-0.408824	228	0.24		TGCAGAAACTGGTACCATAACAGGAGAGGCATCAATATCCAGGGAGCCTAACCAAAACTCCATGGACAG	5829941	1.52834e-30	CM007195.1_chromosome_B1	6597549	8.49476e-29		0	999		0	999		0	0	999		0	999
5856033	1	B01	25.5179	0.263468	-0.579272	228	0.406764		TGCAGGTAACCTACAGCTACCCTAAGTAATCTTCAGTTTTTATCAGCCTTGACGCAAGAACCTTTTTAC	5856033	1.52834e-30	CM007195.1_chromosome_B1	6509526	3.05526e-28		0	999		0	999		0	0	999	CM004491.1_chromosome_B1	26720715	6.21056e-17
5846821	1	B01	27.5656	0.722915	-0.140913	228	0.0407934		TGCAGAACAGCAAAGAACATGATCCACAAGACACGAATTAC	5846821	2.50443e-15	CM007195.1_chromosome_B1	6025509	4.33674e-13		0	999		0	999		0	0	999	CM004491.1_chromosome_B1	26268419	1.93407e-13
5841609	1		27.8907	0.765476	-0.116068	228	0.0288707		TGCAGAACAGCAAAGAACATGTGAACTTTTATCTACAAGAGACACGAATTAC	5841609	2.92937e-21		0	999		0	999		0	999		0	0	999		0	999
5831058	1		27.9069	0.561194	-0.250887	228	0.109611		TGCAGAGTTGATTCCTCACCCAACTAAACTTAGCATAACCACCAGGTAGAGAAACTCAAATAGTAATAT	5831058	1.52834e-30		0	999		0	999		0	999	chrA01_random	2408144	1	1.28417e-16		0	999
5847187	1		27.9069	0.636747	-0.196033	228	0.0723828		TGCAGCAATAACGTATAAAACGGGCTTTTTGGCCCAATACGTCAAACTTTAC	5847187	2.92937e-21		0	999		0	999		0	999		0	0	999	CM004491.1_chromosome_B1	26345280	1.08206e-12
5856037	1	B01	28.9077	0.463698	-0.333765	228	0.174392		TGCAGGTCTAAAACCAAAAGATTTGCAAAAGTGAGGGTATTTTTGGAGAAATTGTAATTTTCATTACAG	5856037	1.52834e-30	CM007195.1_chromosome_B1	5939531	1.43157e-21		0	999		0	999		0	0	999	CM004491.1_chromosome_B1	26210478	3.68528e-24
5857851|F|0--10:G>A	1	B01	29.5857	0.419021	-0.377764	228	0.212156		TGCAGCTATTGTTATCGAGGCAATATCAGAGCTGGTAAATATGAAATATATGAGTTTAC	5857851	4.58575e-25	CM007195.1_chromosome_B1	5917966	3.97864e-21		0	999		0	999		0	0	999	CM004491.1_chromosome_B1	26194118	1.72509e-21
5863283|F|0--13:C>A	1	B01	30.5958	0.407251	-0.390138	228	0.223138		TGCAGCTGGACGTCTGAAGAAAAAGGAAGCAGCGTGTTGCGGAGCCCCAACTGTAACTGGTACAGATGC	5863283	1.52834e-30	CM007195.1_chromosome_B1	5267565	3.95223e-27	C1	34778007	4.47121e-24	NC_027748.1_chromosome_C1	34778007	4.47425e-24	chrA01	18352304	2	1.63784e-25	CM004491.1_chromosome_B1	25431472	1.70251e-27
5851536	1	B01	30.5958	0.476236	-0.322178	228	0.164806		TGCAGATTCTTCGATGCAGGTGACATTACTTCCATTCGAGGTTCCTAAGAAGATACAATCTCAGCACGC	5851536	1.52834e-30	CM007195.1_chromosome_B1	5266481	3.95223e-27	C1	34776906	9.61023e-26	NC_027748.1_chromosome_C1	34776906	9.61678e-26	chrC01	32823600	2	1.63784e-25	CM004491.1_chromosome_B1	25430390	3.6593e-29
5856587|F|0--29:T>A	1	B01	30.5958	0.977258	-0.00999087	228	0.00026362		TGCAGAAACAGTGGAAATTTTTGTTGGTGTTGTCACATATGAAATTTATTTTTAC	5856587	6.88654e-23	CM007195.1_chromosome_B1	11513518	5.87442e-19		0	999		0	999		0	0	999	CM004491.1_chromosome_B1	25627344	2.55677e-19
5836426	1	B01	31.6059	0.235536	-0.627942	228	0.457886		TGCAGGTCTCCGTCCAGCTGCCTCTTATAGAGCTACTACTGATCATTTGTCTGGAAGTGACGCTCGCGG	5836426	1.52834e-30	CM007195.1_chromosome_B1	12168083	1.83879e-25	Scaffold01349	9191	2.08025e-22	NW_013617888.1_UnpScaffold01349	9191	2.08167e-22	chrC01	32187211	2	3.5453e-22	CM004491.1_chromosome_B1	25169033	7.921e-26
5845698	1		32.2793	0.381783	-0.418183	228	0.248567		TGCAGCCGATTATGCGAGAGGTTATAAACAATATATAGAGTTGTTATTTTAGTTAC	5845698	1.96942e-23		0	999		0	999		0	999		0	0	999		0	999
5850396|F|0--10:G>A	1	B01	32.2793	0.539296	-0.268173	228	0.122349		TGCAGACTACGGCAACGTGAAGCTGATTGATCAACAAGTGAATGCTGCTTCATCAGCTTCTTTGATGAC	5850396	1.52834e-30	CM007195.1_chromosome_B1	12362993	3.95223e-27		0	999		0	999		0	0	999	CM004491.1_chromosome_B1	25029825	1.70251e-27
5842377	1		32.2793	0.981878	-0.00794236	228	0.000167367		TGCAGATAAATAACTAAATTTCATGTGGACATTCACGGCTGTAAGACAAGAAGTACTTTAC	5842377	3.72679e-26		0	999		0	999		0	999		0	0	999	CM004491.1_chromosome_B1	24932126	3.03012e-24
5860886	1	B01	33.2894	0.359872	-0.443852	228	0.272459		TGCAGGAGCAATTTATAGGAGGCACAGATACCTCGGTGCAAACCACTCAATGGGCAATGGCTGAGATCC	5860886	1.52834e-30	CM007195.1_chromosome_B1	12280771	3.95223e-27		0	999		0	999		0	0	999	CM004491.1_chromosome_B1	25083614	1.70251e-27
5835217	1		34.2995	0.161401	-0.792094	228	0.638929		TGCAGAAAATCTTGGTAGATGATAGGTGAGAGAGAAGTAAAAATGGAAAAGTAGCAACGATGATCAAGT	5835217	1.52834e-30	LFQT01007880.1_Scaffold00029	242737	8.49476e-29		0	999		0	999		0	0	999	CM004491.1_chromosome_B1	25031611	3.6593e-29
5835706	1	B01	34.2995	0.16513	-0.782175	228	0.62766		TGCAGATGGCTGAGGTTTGGCGCGAGGAACAGGAACGTGTCCTTGTTTGATGCCAAAGTAGCACTTGAG	5835706	1.52834e-30	CM007195.1_chromosome_B1	12363862	8.49476e-29		0	999		0	999		0	0	999	CM004491.1_chromosome_B1	25028979	3.6593e-29
5859723	1	B01	34.2995	0.249892	-0.602247	228	0.430731		TGCAGAGCCACCCTTTCCCTGCATAAATTACAAGAAATTGTGAATGCAATTCAAATCTCGAAGTGTTAC	5859723	1.52834e-30	CM007195.1_chromosome_B1	12425785	3.05526e-28		0	999		0	999		0	0	999	CM004491.1_chromosome_B1	24983496	3.68528e-24
5845457	1		34.2995	0.368874	-0.433122	228	0.262403		TGCAGAGAGGCTCAATCACAGAAATAAGCAACGTTTGAAATAAATAGTTAC	5845457	1.02066e-20	LFQT01007880.1_Scaffold00029	242689	1.83111e-18		0	999		0	999		0	0	999	CM004491.1_chromosome_B1	25031563	8.00924e-19
5862715	1	B01	34.2995	0.800662	-0.0965509	228	0.0206836		TGCAGCATCTTTAGTCATTGTTGGACCAAAATTAC	5832060	1.95848e-10	CM007195.1_chromosome_B1	12426357	6.07419e-10		0	999		0	999		0	0	999	CM004491.1_chromosome_B1	24982963	3.61041e-09
5832009	1		34.6362	0.406064	-0.391405	228	0.224271		TGCAGCATAATTCTACGGCAACAAAATCTACAGTCATAGAAAAAAATCTACAGCAAAATTTTTAC	5832009	2.44442e-28		0	999		0	999		0	999		0	0	999		0	999
5835086	1		34.6362	0.881729	-0.0546647	228	0.00718072		TGCAGTTTTGATTGGGGGAGCTCAAGTTCAAAAGATAATAGATAAGATTCAAACACTTTTCATAAGAGA	5835086	1.52834e-30		0	999		0	999		0	999		0	0	999		0	999
5836816	1		34.9763	0.556789	-0.254309	228	0.112097		TGCAGTTCTAACATCTAACCAATAAGATCAGAATGGACCCTGCATCAACACACAAATGCAGACAACATA	5836816	1.52834e-30		0	999		0	999		0	999		0	0	999		0	999
5861562|F|0--59:C>A	1	B01	35.983	0.261016	-0.583333	228	0.410978		TGCAGTGTGTACCTTCCTACATTTTCTAGATTCGAACTGATAATATGGACGAAACAGTCCTGGTGCCAT	5861562	1.52834e-30	CM007195.1_chromosome_B1	13224759	8.49476e-29		0	999		0	999		0	0	999	CM004491.1_chromosome_B1	24281750	7.921e-26
5834792	1	B01	36.6586	0.199644	-0.699743	228	0.535572		TGCAGTTCTAGCATCTAACTAATAAGATCAGAACAGTTTCTAAGATCAGAATGGACTCTGCATCAACAC	5834792	1.52834e-30	CM007195.1_chromosome_B1	6734320	3.98029e-22		0	999		0	999		0	0	999		0	999
5845586	1		36.6586	0.352364	-0.453009	228	0.281116		TGCAGATTGCCTTGTACGTTACATAGTCATTGAGTCTCACCGAGGGTTTCTTAC	5845586	2.40607e-22		0	999		0	999		0	999		0	0	999		0	999
5846174	1		38.401	0.32039	-0.494321	228	0.320995		TGCAGTGTATGAAAGTGAAACTGTAGTCATTTTGTTAC	5846174	1.07441e-13	LFQT01007849.1_Scaffold07213	1133	1.66163e-11		0	999		0	999		0	0	999		0	999
5831588	1		38.6857	0.388482	-0.410629	228	0.241647		TGCAGATTTTACTCACTTCTTATTCTAGTCAAACCAAATTCTTCTGCTGCAATAGCAGCACACTCATGT	5831588	1.52834e-30	LFQT01007849.1_Scaffold07213	1067	8.55507e-24		0	999		0	999		0	0	999	CM004491.1_chromosome_B1	22237367	3.6593e-29
5857897	1		38.6857	0.634443	-0.197608	228	0.0733774		TGCAGCTGAATGGCTCGCACGGTCCATAAAAAAGGTTTAC	5857897	3.99124e-13		0	999		0	999		0	999		0	0	999	CM004491.1_chromosome_B1	22359944	3.05658e-11
5837669	1		39.0235	0.200876	-0.697072	228	0.532637		TGCAGTTACTTAGATACAGACGTGTAACGCGAGAAGGGAATTGTAGTTCCTCAGATAACAATTTACAGA	5837669	1.52834e-30	CM007199.1_chromosome_B5	43564603	2.39552e-19		0	999		0	999		0	0	999		0	999
5858157	1	B01	39.0859	0.217831	-0.66188	228	0.494288		TGCAGGCGTGACTCTCTATCCTTGATGGGTCAGTTCCACTTTTAGTTAC	5858157	1.23513e-19	CM007195.1_chromosome_B1	8974496	2.18648e-17		0	999		0	999		0	0	999	CM004491.1_chromosome_B1	21771949	9.59315e-18
5853974	1	B01	39.0859	0.371447	-0.430103	228	0.259592		TGCAGGGGAAGTTTCCAATTCACACTCCATGTCACTATCATCATCCTACACAAGCACAAGTTTGTTACA	5853974	1.52834e-30	CM007195.1_chromosome_B1	8940395	1.09887e-27	C1	26215817	2.69097e-21	NC_027748.1_chromosome_C1	26215817	2.69281e-21	chrC01	25438981	2	4.58613e-21	CM004491.1_chromosome_B1	21809826	4.73361e-28
5831198	1		39.7708	0.441305	-0.355261	228	0.192582		TGCAGATATGATCGAAGAGGTGCAAAAGTAGGAGTCGTGGTGCTGCAATGATTTCAGGTTTTCTTTATC	5831198	1.52834e-30	CM007185.1_chromosome_A1	21339407	8.49476e-29		0	999		0	999		0	0	999	CM004491.1_chromosome_B1	21529315	3.6593e-29
5845868	1		40.4534	0.240062	-0.619677	228	0.449112		TGCAGGAGAAAGCGAAGGGGCTTGCTTCAACTCACCCAATCCGTCTTGGATTAC	5845868	2.40607e-22	CM007185.1_chromosome_A1	21373543	4.38983e-20		0	999		0	999		0	0	999	CM004491.1_chromosome_B1	21500602	8.89915e-19
5845676	1		40.4534	0.291357	-0.535574	228	0.362054		TGCAGCCAAATGGGATAATAGAAGTTGAACGAAGAGTGAGAAGATAAGAACAAAAGTTAC	5845676	1.3077e-25	CM007187.1_chromosome_A3	20639267	8.92849e-13		0	999		0	999		0	0	999	CM004491.1_chromosome_B1	21443633	1.78697e-16
5858823|F|0--39:G>A	1		40.7127	0.0066185	-2.17924	228	2.43151		TGCAGTTTATGTGCTACTAAACTGGTTCAAAGAGGACAGGTGACAAGAAACATCAAGTTAC	5858823	3.72679e-26	CM007187.1_chromosome_A3	20754207	3.2566e-22		0	999		0	999		0	0	999	CM004491.1_chromosome_B1	21337722	1.40978e-22
5858823	1		40.7127	0.0493586	-1.30664	228	1.26397		TGCAGTTTATGTGCTACTAAACTGGTTCAAAGAGGACAGGTGACAAGAAACATCAAGTTAC	5858823	3.72679e-26	CM007187.1_chromosome_A3	20754207	3.2566e-22		0	999		0	999		0	0	999	CM004491.1_chromosome_B1	21337722	1.40978e-22
5858824	1		40.7127	0.13575	-0.86726	228	0.725509		TGCAGTTTATGTGCTACTAAACTGGTTCAAAGAGGACAGATGACGAGAAACATCAAGTTAC	5858824	3.72679e-26		0	999		0	999		0	999		0	0	999		0	999
5853186|F|0--25:A>G	1		41.3861	0.00508396	-2.2938	228	2.5911		TGCAGCTTCCCAATCTCTAGAGGCAACTTTCTCAACCCTAAGCAATAAGATATATCCAGAAACCTCAAG	5853186	1.52834e-30	CM007187.1_chromosome_A3	20946128	8.49476e-29	C2	52538850	2.09502e-17	NC_027749.1_chromosome_C2	52538850	2.09645e-17	chrC09	4799506	4	1.64947e-20	CM004491.1_chromosome_B1	21141052	7.97723e-21
5843372	1		41.3861	0.0175202	-1.75646	228	1.85381		TGCAGCGTAGTCGATGCCGTCTTCTTCCTTAC	5843372	1.59127e-10	LFQT01000155.1_Scaffold00271	7140	8.31631e-08	C2	52355605	4.25003e-08	NC_027749.1_chromosome_C2	52355605	4.25293e-08	chrC02_random	5140844	3	7.4073e-08	CM004494.1_chromosome_B4	11608918	3.89199e-08
5856769	1		41.3861	0.021636	-1.66482	228	1.73129		TGCAGAAGGGCGAATCTAATCAGCGACAACAAATTAGGACACAATAATATTATCTTAC	5856769	1.60704e-24	CM007193.1_chromosome_A9	11438889	2.98522e-22		0	999		0	999		0	0	999	CM004491.1_chromosome_B1	21127557	1.29547e-22
5839590	1		41.3861	0.0676858	-1.1695	228	1.09097		TGCAGTGGCAGTGAATTATGAATATAGCTAGGAAAGGAGGGCTTTGGGAAAAGGGTATTCAGGATTGTT	5839590	1.52834e-30		0	999		0	999		0	999		0	0	999	CM004491.1_chromosome_B1	21429538	6.16678e-22
3146792	1		41.3861	0.131709	-0.880383	228	0.740828		TGCAGAACACCAGATTCTGGTAGGAGTTTGTAATGTTAC	3146792	3.1445e-14	CM007193.1_chromosome_A9	11675151	1.78031e-11	C9	6815028	9.7049e-12	NC_027756.1_chromosome_C9	6815028	9.71151e-12	chrC09	5260008	1	1.58573e-11	CM004491.1_chromosome_B1	21420872	7.99853e-12
5845750	1		41.7239	0.0415433	-1.3815	228	1.35993		TGCAGCTAAAACACTCGCGATCAGTGATGTTAC	5845750	4.76465e-11		0	999		0	999		0	999		0	0	999		0	999
5852819	1		41.8186	0.0820795	-1.08577	228	0.987324		TGCAGCTACGATAAGAATGTTCAATGACGCGGCCATTTTGGGAATTCTTCTTCTTGATGAGTACTCGTT	5852819	1.52834e-30	CM007187.1_chromosome_A3	20730308	3.95223e-27		0	999		0	999		0	0	999	CM004491.1_chromosome_B1	21362588	7.921e-26
5843736	1		42.1587	0.0250426	-1.60132	228	1.64703		TGCAGGAAATATCTATCAGAGCATTTTAC	5843736	5.69496e-09		0	999		0	999		0	999		0	0	999		0	999
5861700|F|0--58:A>G	1		42.3996	0.0040389	-2.39374	228	2.73126		TGCAGTTTCGTAGATTGTGTAGAGCTCGTTCGTTTGAATTTGAACCGATGCTTATACTAATGTTCGATT	5861700	1.52834e-30	CM007187.1_chromosome_A3	21036451	3.95223e-27		0	999		0	999		0	0	999	CM004491.1_chromosome_B1	21053503	1.70251e-27
5855756	1		42.3996	0.0801876	-1.09589	228	0.999771		TGCAGAAAAACAAATTCTAACCCCAGAAAAAAGAAAAGAGGGAGATTATATCGAAGGAGAACGAAACTT	5855756	1.97704e-29	CM007187.1_chromosome_A3	21036385	5.14883e-21		0	999		0	999		0	0	999	CM004491.1_chromosome_B1	21053569	2.21797e-21
5843395	1		42.403	0.0785457	-1.10488	228	1.01084		TGCAGCTAAAACACTCGAGATCAGTGATCTGGTTAC	5843395	1.24354e-12	CM007187.1_chromosome_A3	21011703	1.84238e-10		0	999		0	999		0	0	999		0	999
5850043|F|0--41:T>C	1		43.4097	0.00307402	-2.51229	228	2.89861		TGCAGAATATCACACCAGTGAAGTTATCAACCCAATAGTGTTACAAACAAATATGATCAGTCACTATTT	5850043	1.52834e-30		0	999		0	999		0	999		0	0	999	CM004491.1_chromosome_B1	20722234	1.70251e-27
5860011|F|0--25:A>C	1	B01	43.4097	0.00313174	-2.50421	228	2.88717		TGCAGATTTCACATGTCTGTCCTCTAAGCTCTTGCACTGATCTTATCTGCAACAATTACATCCATTTAC	5860011	1.52834e-30	CM007195.1_chromosome_B1	10592387	6.61348e-25	C9	5611354	1.60813e-23	NC_027756.1_chromosome_C9	5611354	1.60923e-23	chrC09	4011513	4	2.74068e-23	CM004491.1_chromosome_B1	20671859	2.8489e-25
5833948	1	B01	43.4097	0.00818153	-2.08717	228	2.30412		TGCAGTAAGTATAAAATTCTTGTGTTATGACACTGTTTTCAGACACAAAAAGGATGAATATAAGTTACA	5833948	1.52834e-30	CM007195.1_chromosome_B1	10554990	1.09887e-27		0	999		0	999		0	0	999		0	999
5837748	1		43.4097	0.01271	-1.89585	228	2.04215		TGCAGATTGTGTCTCTGAAGGAAGAGGAAACTGGCCTGGAGTGTACCTACGCAATTTCATAATTCATCA	5837748	1.52834e-30	CM007193.1_chromosome_A9	7303805	1.85185e-20		0	999		0	999		0	0	999	CM004491.1_chromosome_B1	20326979	3.6593e-29
5831285	1	B01	43.4097	0.0146947	-1.83284	228	1.95673		TGCAGATCTAGTCTTGAGAACATTCTTTTCCAAGACCTCGGGAACATCTGACTCTTTTATAACCTTACA	5831285	1.52834e-30	CM007195.1_chromosome_B1	10639938	3.07695e-23		0	999		0	999		0	0	999	CM004491.1_chromosome_B1	20648915	6.16678e-22
5842787	1	B01	43.4097	0.0351657	-1.45388	228	1.45363		TGCAGCAAAGAAGAAGAAGAGGTTATCCCAAAGACTTTCACAGAACTTTAC	5842787	1.02066e-20	CM007195.1_chromosome_B1	10545476	1.83111e-18		0	999		0	999		0	0	999		0	999
5839785	1	B01	43.4097	0.112332	-0.949498	228	0.822422		TGCAGATCTAGTCTTGAGAACATTCTTATTTTCCAAGACCTCGGGAACATCTGACTCTTTTATAACCTT	5839785	1.52834e-30	CM007195.1_chromosome_B1	10639938	8.49476e-29		0	999		0	999		0	0	999	CM004491.1_chromosome_B1	20648915	1.70251e-27
5860011	1	B01	43.4097	0.159062	-0.798433	228	0.64615		TGCAGATTTCACATGTCTGTCCTCTAAGCTCTTGCACTGATCTTATCTGCAACAATTACATCCATTTAC	5860011	1.52834e-30	CM007195.1_chromosome_B1	10592387	6.61348e-25	C9	5611354	1.60813e-23	NC_027756.1_chromosome_C9	5611354	1.60923e-23	chrC09	4011513	4	2.74068e-23	CM004491.1_chromosome_B1	20671859	2.8489e-25
5842705	1		43.4097	0.24798	-0.605583	228	0.434236		TGCAGATTGTAAGAGTTTCCGCCGCTTTAC	5842705	1.74175e-09		0	999		0	999		0	999		0	0	999		0	999
14781372	1		44.4198	0.123425	-0.908596	228	0.773953		TGCAGACCTTATTGGAGAGTTGACAGCAATAAGAAGCACTTTTAC	14781372	1.78173e-17		0	999		0	999		0	999		0	0	999	CM004496.1_chromosome_B6	31884618	1.41265e-15
14778601	1		44.7565	0.0201031	-1.69674	228	1.77384		TGCAGCATCCTCAAGAGGAAGAAGATTGTTTTTTCTTGTACATTTGTCTCTTCCATTAGAACTTACAGA	14778601	1.52834e-30	CM007193.1_chromosome_A9	7540583	6.61348e-25		0	999		0	999	chrC09	3683169	2	4.58613e-21	CM004491.1_chromosome_B1	20458597	2.8489e-25
5846412	1		45.4299	0.0356584	-1.44784	228	1.44577		TGCAGAGGAGAGGAAAAACACAATAAGGAACTCAAGTATATTTATTGTGTGTTAC	5846412	6.88654e-23	CM007193.1_chromosome_A9	7136175	1.26262e-20		0	999		0	999		0	0	999		0	999
5837081	1		45.4299	0.590273	-0.228947	228	0.0941086		TGCAGAGCAAATATTCACCAAACTCTTGTAAGTAGACAATAAAAAATTCCAAGATAACAACCGTAACGG	5837081	7.11069e-29	CM007193.1_chromosome_A9	7427524	8.49476e-29		0	999		0	999		0	0	999		0	999
14762987	1		45.7666	0.0724595	-1.1399	228	1.05415		TGCAGATTGTAAGAGTTTCCGCCGCCTCTAAGATTTCAATCTTGTATGTTAC	14762987	2.92937e-21	CM007193.1_chromosome_A9	7445561	5.28698e-19		0	999		0	999		0	0	999		0	999
5859154	1		45.7666	0.121105	-0.916837	228	0.783678		TGCAGCAAAAGACTTAGTGACCTGTTGTTTTTCTCTTTTGTTGCATTAGCTTAC	5859154	1.11944e-20		0	999		0	999		0	999		0	0	999		0	999
19818795	1		45.7666	0.189284	-0.722885	228	0.561131		TGCAGGAAAGTGAATAGGTAAAACAATCTGCTTCTCTCCTAACATGCGACCAAAGCCTAATCAGATTTA	19818795	1.52834e-30		0	999		0	999		0	999		0	0	999		0	999
14770083	1		46.7801	0.0452938	-1.34396	228	1.31168		TGCAGGAAACGTGGTATCGACATGTGAACTTCCGTAGTCTTCTCCTTCTCGGAACTCTGAAACGTTACA	14770083	1.52834e-30		0	999		0	999		0	999		0	0	999		0	999
5849471|F|0--58:C>T	1		47.118	0.007685	-2.11436	228	2.34166		TGCAGAAAATATATATTACAAACAAAACCAAATACTTTCAAAGTTCTTTTGTAACATCCCAGTTCGGGC	5849471	1.52834e-30	CM007193.1_chromosome_A9	6862059	8.49476e-29		0	999		0	999		0	0	999	CM004491.1_chromosome_B1	19926053	2.23372e-16
14772969	1		48.1281	0.00402488	-2.39525	228	2.73339		TGCAGTTCATAAAAAAAAGTTTTGGACCAAAACTCATAACCTCTCAACTTAC	14772969	2.92937e-21	LFQT01005334.1_Scaffold08018	61	4.1161e-15		0	999		0	999	chrA09	3051841	1	6.13496e-13		0	999
5838984	1		48.1281	0.163548	-0.786354	228	0.632403		TGCAGCTGCCCTTTTCATTTCATACACTTCTGCTCTCCCTCTCGATGGTTAGTGTATACTCTCTCCCTC	5838984	1.52834e-30		0	999		0	999		0	999		0	0	999		0	999
5862608|F|0--16:T>C	1		48.8015	0.00859532	-2.06574	228	2.27459		TGCAGTCCTCTCATTATTTTCAAATCTCCTCTGCTTCAAGCCTTAC	5862608	5.15204e-18	CM007193.1_chromosome_A9	7088718	4.33853e-14		0	999		0	999		0	0	999	CM004491.1_chromosome_B1	20131218	4.10623e-16
5838954	1		48.8015	0.02575	-1.58922	228	1.63104		TGCAGCATCGAGGCCTAGTCAAAATCCTTTTCTTGATCATGACGATAAACAAAGTATCAATTACTTCTA	5838954	1.52834e-30		0	999		0	999		0	999		0	0	999		0	999
5847589	1		48.8015	0.0644331	-1.19089	228	1.1177		TGCAGCAGTCAATAGTATCGCAAGTGATCCCTACAAAACAAGAATCAGATTTTTTTTTAC	5847589	1.3077e-25	CM007193.1_chromosome_A9	10043787	4.09566e-21	C9	4826198	2.78479e-20	NC_027756.1_chromosome_C9	4826198	2.78669e-20	chrA09	3035395	3	1.0143e-21	CM004491.1_chromosome_B1	20103304	1.06037e-23
5834957	1		49.4749	0.000643654	-3.19135	228	3.87688		TGCAGTTTATGAATAAAGGAAGAAACTTTTGAGGAACCCAAGAAGATAACAAAACAGAGTTTGTATTTA	5834957	1.52834e-30	CM007193.1_chromosome_A9	6846669	1.10667e-22	C9	4613441	2.08025e-22	NC_027756.1_chromosome_C9	4613441	2.08167e-22	chrC09	3231748	4	3.5453e-22	CM004491.1_chromosome_B1	19910669	1.02465e-24
5842321	1		49.4749	0.00326709	-2.48584	228	2.86117		TGCAGAGTCATGGTTTTATAATGAATCTTTACCCTTTGAGCTCCAGTTAC	5842321	3.55254e-20		0	999		0	999		0	999		0	0	999	CM004491.1_chromosome_B1	20154504	2.77394e-18
5863583	1	A09	49.8116	9.86e-05	-4.00612	228	5.08793		TGCAGTGTACCAAAACTAATACTGGAACCGTGTAAAGTTATTGCGTCTTGGTCTTTCTATTGGCCATCA	5863583	1.52834e-30	CM007193.1_chromosome_A9	6480570	1.83879e-25		0	999		0	999		0	0	999	CM004491.1_chromosome_B1	19563260	1.70251e-27
5861424	1		49.8116	0.00175624	-2.75542	228	3.24518		TGCAGTCTCTTCTGATTCCAGTACAAGAATCTCTACTTGAACCTTTCTCCTTTCGAACATTTTCTTGTA	5861424	1.52834e-30	CM007193.1_chromosome_A9	6750724	1.83879e-25	C9	4480583	4.50295e-19	NC_027756.1_chromosome_C9	4480583	4.50602e-19	chrC09	3154287	1	7.67422e-19		0	999
5832583	1		49.8116	0.00289712	-2.53803	228	2.93509		TGCAGCTAGAGCTAAAGCTTGGTATAGGAGGCACGTCATATAAAGATTTCATTCAAAGCCTTCATCTAC	5832583	1.52834e-30	CM007193.1_chromosome_A9	6787185	8.49476e-29	C9	4511827	2.08025e-22	NC_027756.1_chromosome_C9	4511827	2.08167e-22	chrC09	3168338	2	3.5453e-22	CM004491.1_chromosome_B1	19825505	3.6593e-29
5843024	1		49.8116	0.00296061	-2.52862	228	2.92174		TGCAGCAGTCAATAGTATCGCAAGTGATCCCTACAAAACAAGAATTAGATTTAC	5843024	2.40607e-22	CM007193.1_chromosome_A9	7067035	4.38983e-20	C9	4826198	1.80672e-16	NC_027756.1_chromosome_C9	4826198	1.80795e-16	chrC09	3440924	3	3.04414e-16	CM004491.1_chromosome_B1	20103304	3.20071e-18
5854441	1		49.8116	0.0032769	-2.48454	228	2.85933		TGCAGTAACTCGGATTCCTCATTAGTCTCCTACGCTACGCACACCGTGAGTAACAAGTCTGTGGATGCT	5854441	1.52834e-30	CM007193.1_chromosome_A9	6440430	3.95223e-27		0	999		0	999		0	0	999	CM004491.1_chromosome_B1	19532692	1.70251e-27
5842255	1		49.8116	0.0060097	-2.22115	228	2.48975		TGCAGAGGAGTTTAGGAATATAAAATAGTTTTGTTATTTTTGAAGATGTTAC	5842255	2.92937e-21		0	999		0	999		0	999		0	0	999	CM004491.1_chromosome_B1	19726390	1.07443e-17
5843155	1		49.8116	0.0135867	-1.86689	228	2.00283		TGCAGCCACGCCCTTGGAGAACCCAGACGAAACCGTTACATCTTCACCCATTTTTTTAC	5843155	4.58575e-25	CM007193.1_chromosome_A9	7118167	3.97864e-21		0	999		0	999		0	0	999	CM004491.1_chromosome_B1	20167051	1.72509e-21
5849931	1		49.8116	0.0188252	-1.72526	228	1.81198		TGCAGAAGCTGTCTTGCCTCCTTGTGACAGTTTCTAGCTGAATCCTTATTTATTTTTTTGTCATTTAGT	5849931	1.52834e-30	CM007193.1_chromosome_A9	7063297	8.49476e-29		0	999		0	999		0	0	999		0	999
5840186	1		50.1483	0.000610493	-3.21432	228	3.9105		TGCAGCGATGATTACAATAGAATCTTTCTAGCCGCTTTGGTTTGCTGCCTAACCAACGGAAACAACTGT	5840186	1.52834e-30	CM007193.1_chromosome_A9	6480636	2.37863e-24		0	999		0	999		0	0	999	CM004491.1_chromosome_B1	19563326	1.02465e-24
5830300	1		50.1483	0.00121463	-2.91556	228	3.47577		TGCAGAAGTTACAAATCAAAACTATATTACAGAAAGCAAAGTAATACTCTACTCATACTCCCTTGGATT	5830300	1.52834e-30	CM007193.1_chromosome_A9	6787119	1.865e-15		0	999		0	999		0	0	999	CM004491.1_chromosome_B1	19825439	3.71145e-19
5839424	1		50.485	0.078685	-1.10411	228	1.00989		TGCAGAAACCTGTGGGGTTATGCGTTCGCCAGCTTCCTAATGCAAAATAGAAATCGGATAAGGCGGTTT	5839424	1.52834e-30		0	999		0	999		0	999		0	0	999		0	999
5839444	1		50.485	0.0977122	-1.01005	228	0.895081		TGCAGAGACGATAGAGACAAGCATACGTTAGAGCTTGCTATGTGAGTATGCAATGTAAACAAACAGTAA	5839444	1.52834e-30		0	999		0	999		0	999		0	0	999	CM004491.1_chromosome_B1	19669477	3.6593e-29
5861425	1		50.8228	0.0300407	-1.52229	228	1.54295		TGCAGTCTCGTCTGATTCCAGGACAAGAATCTCTACCTGAACCTTTCTCCTTTCGAACATTTTTTTGTA	5861425	1.52834e-30	CM007193.1_chromosome_A9	6750724	1.83879e-25		0	999		0	999		0	0	999	CM004491.1_chromosome_B1	19793551	1.70251e-27
5837713	1		50.8228	0.0581369	-1.23555	228	1.17381		TGCAGTTTATGAATAAAGGAAGAAACTTTTGAGGAACCCAAGAAAATAACAAAACAGAGTTAC	5837713	3.02152e-27	CM007193.1_chromosome_A9	6846669	5.71164e-25	C9	4613441	8.388e-21	NC_027756.1_chromosome_C9	4613441	8.39372e-21	chrC09	3231748	2	1.42454e-20	CM004491.1_chromosome_B1	19910669	1.92224e-21
5861726	1		51.1584	0.0277064	-1.55742	228	1.58911		TGCAGTTTTACGCAGCTTCTCGCTCAAAATTCCCTGAGACTCCTCAAGCGTCTTGGCGTGCTTGTTCTG	5861726	1.52834e-30	CM007190.1_chromosome_A6	23848299	1.85185e-20	C7	37975792	4.50295e-19	NC_027754.1_chromosome_C7	37975792	4.50602e-19	chrAnn_random	37757366	2	1.64947e-20		0	999
5864407|F|0--13:T>C	1		51.1584	0.508691	-0.293546	228	0.14182		TGCAGTATGAAGATGAAGACCACGATAAAGTGTTGTTGGCCTCAGATAGTGACCTCCAAGCAGCCATAG	5864407	1.52834e-30	LFQT01002590.1_Scaffold00349	35289	3.95223e-27	C9	5173372	4.47121e-24	NC_027756.1_chromosome_C9	5173372	4.47425e-24	chrCnn_random	49630207	1	7.62012e-24	CM004494.1_chromosome_B4	10808840	1.70251e-27
5839420	1		51.4985	0.0908956	-1.04146	228	0.933163		TGCAGAAAACAGAAGGAGAAGAAGAAGAAGAAGAAGAAGTGGCAAAACTTGGGGAAAGTCGAAGGCATG	5839420	1.52834e-30		0	999		0	999		0	999		0	0	999	CM004491.1_chromosome_B1	19049379	6.16678e-22
5847127	1		51.4985	0.163386	-0.786785	228	0.632892		TGCAGACGATATCTTTCGATGCACTCAGCATTAGTGGTGATTAC	5847127	6.15192e-17	CM007193.1_chromosome_A9	5904475	1.09661e-14		0	999		0	999		0	0	999	CM004491.1_chromosome_B1	18998021	1.04981e-11
5853310|F|0--22:G>C	1		51.8352	0.000466198	-3.33143	228	4.08242		TGCAGCTTTTCTACCAGCACTGGCTGGAAGTAGGGAGAATTCAGCTGTATATATCCTTGGAAGAGAATT	5853310	1.52834e-30	CM007193.1_chromosome_A9	6063477	3.95223e-27	C9	3797820	2.08025e-22	NC_027756.1_chromosome_C9	3797820	2.08167e-22	chrC09	2455062	4	3.5453e-22	CM004491.1_chromosome_B1	19153015	1.70251e-27
5857571	1		51.8352	0.00129388	-2.88811	228	3.43612		TGCAGCAGGAAGCTAGACAAATCAGGCCAAATTCTCCACTGCAATCGCTGTATTAC	5857571	1.96942e-23	LFQT01003405.1_Scaffold00160	173243	1.68775e-19		0	999		0	999		0	0	999	CM004495.1_chromosome_B5	30800209	3.41409e-18
5843359	1		51.8352	0.00287461	-2.54142	228	2.93989		TGCAGCGGGAGTGAGAATATAAGCTGCACAAGGCTTTTTACAATGCTATAATTTTAC	5843359	5.62783e-24	LFQT01003405.1_Scaffold00160	178475	1.04114e-21		0	999		0	999		0	0	999	CM004495.1_chromosome_B5	30799923	4.5223e-22
5830816	1		51.8352	0.00386079	-2.41332	228	2.75883		TGCAGAGAGGATGATTCAGCTGAGTGCTTTTGTGGGCACTTTACAATGGGCGCCACGCAATTCATTACA	5830816	1.52834e-30	CM007193.1_chromosome_A9	5911401	8.55507e-24		0	999		0	999		0	0	999	CM004491.1_chromosome_B1	19008761	3.68528e-24
5832167	1		51.8352	0.0117531	-1.92985	228	2.08842		TGCAGCCAGTGCAGGAGACATAATACCAGCCATTATGCTTCAAAACCTCAAGAATCCGAGCCTTGCAAA	5832167	1.52834e-30	LFQT01003405.1_Scaffold00160	173296	8.49476e-29		0	999		0	999		0	0	999	CM004495.1_chromosome_B5	30800262	3.6593e-29
5848011	1		51.8352	0.012419	-1.90591	228	2.05583		TGCAGTGAGGTATCACTCTGGTCTCCTTCCCCAAACATAGGTTAC	5848011	1.78173e-17		0	999		0	999		0	999		0	0	999	CM004491.1_chromosome_B1	19161323	1.41265e-15
5832507	1		51.8352	0.0162521	-1.78909	228	1.8977		TGCAGCGTTTTATTCCAAGCCTGGACCAAGTTCTTTAGACTTGGACGACCATGTGCCTGTGTAATACGA	5832507	1.52834e-30	CM007193.1_chromosome_A9	6066991	3.95223e-27	C9	3801456	1.60813e-23	NC_027756.1_chromosome_C9	3801456	1.60923e-23	chrC09	2458724	4	7.62012e-24	CM004491.1_chromosome_B1	19156571	7.921e-26
5863098	1		51.8352	0.0308612	-1.51059	228	1.52762		TGCAGCAGAAAATGCTGACTCTCGCCCGAGGCCTATGGAGATCAGATTGTTTATCAGACCCTGCAACAA	5863098	1.52834e-30	CM007193.1_chromosome_A9	6066763	1.83879e-25	C9	3801241	4.47121e-24	NC_027756.1_chromosome_C9	3801241	4.47425e-24	chrC07	34493284	4	7.62012e-24	CM004491.1_chromosome_B1	19156346	7.921e-26
5838286	1		51.8352	0.0395361	-1.40301	228	1.38768		TGCAGAGGATGATTCAGCTGAGTGCTTTTGTGGGCACTTTACAATGGGCGCCACGCAATTCATTACAGA	5838286	1.52834e-30	CM007193.1_chromosome_A9	5911396	6.61348e-25		0	999		0	999		0	0	999	CM004491.1_chromosome_B1	19008756	2.8489e-25
5833120	1		51.8352	0.0472248	-1.32583	228	1.28847		TGCAGGAATGACATATATGTTGTCTTGATGTTCTCTTCAAATGCATTTTCGGTAAAATAGATTTTACAG	5833120	1.52834e-30	LFQT01003405.1_Scaffold00160	178863	3.95223e-27		0	999		0	999		0	0	999	CM004495.1_chromosome_B5	30799515	1.70251e-27
5847212	1		51.8352	0.0486781	-1.31267	228	1.27166		TGCAGCTACCAAAAAGTCCCCCTGACCCTCCTAGACCTTCCTTAC	5847212	1.78173e-17		0	999		0	999		0	999		0	0	999		0	999
5856375	1		51.8352	0.0495867	-1.30464	228	1.26141		TGCAGGTATTTTCTTTTCTGTGGGCAACGGATTAGGAGCAGGGAGAGCAAGGGCTTTTTGTTGGTGAGG	5856375	1.52834e-30		0	999		0	999		0	999		0	0	999		0	999
5856374	1		51.8352	0.125688	-0.900706	228	0.764664		TGCAGGTATTTTCTTTTCTGTGGGCAACGGATTGGTAGCAGGGAGAGCAAGGGCTTTTTGTTGGTGAGG	5856374	1.52834e-30		0	999		0	999		0	999		0	0	999		0	999
5862721	1		51.8352	0.139736	-0.854691	228	0.710891		TGCAGGATCTTATTGTGCCAAATCAGACAGCGTTTGTTAC	5862721	8.57861e-15	CM007197.1_chromosome_B3	8268593	1.46802e-12		0	999		0	999		0	0	999	CM004493.1_chromosome_B3	43906163	6.5697e-13
5847963	1		51.8352	0.174598	-0.757961	228	0.600314		TGCAGCTATATCTTTCCTACTTACTGAAGCAACTAAAGTTTTATTAC	5847963	1.48755e-18		0	999		0	999		0	999		0	0	999	CM004491.1_chromosome_B1	19075234	1.19132e-16
5847237	1		51.8352	0.206326	-0.685445	228	0.519903		TGCAGGCAGATTCCAAAGAGACAGAACCTTAC	5847237	1.59127e-10	CM007193.1_chromosome_A9	5902486	2.31224e-08		0	999		0	999		0	0	999	CM004491.1_chromosome_B1	18996042	1.08212e-08
5844502	1		52.1719	0.00481054	-2.31781	228	2.62469		TGCAGTATCCGTCGGCCACGGACGCACGTTGGAGTCTCTTAC	5844502	7.29484e-16		0	999		0	999		0	999		0	0	999		0	999
5829839	1		52.1719	0.0155186	-1.80915	228	1.92473		TGCAGAAAACAGAAGAAGAAGAAGAAGAAGAAGAAGAAGAAGAAGAAGAAGTGGCAAAACTTGGGGAAA		999		0	999		0	999		0	999		0	0	999		0	999
5831885	1		52.1719	0.0352397	-1.45297	228	1.45244		TGCAGCAGAGAATGCTGACTCTCGCCCCAGGCCTATGGAGATCAGATTGTTTATCAGACCCTGCAAACA	5831885	1.52834e-30	CM007193.1_chromosome_A9	6066763	3.95223e-27	C7	37322722	3.48099e-20	NC_027754.1_chromosome_C7	37322722	3.48337e-20	chrC07	34493284	4	5.93254e-20	CM004491.1_chromosome_B1	19156346	1.70251e-27
5857007|F|0--9:G>T	1		53.8554	0.00118093	-2.92778	228	3.49344		TGCAGAGAAGAAATCATCTTCACATAGCTTTCATGAACCTGTTAC	5857007	1.78173e-17	CM007193.1_chromosome_A9	8528867	3.20144e-15	C9	3075400	7.61155e-14	NC_027756.1_chromosome_C9	3075400	7.61674e-14	chrC09	1833940	2	1.32669e-13	CM004491.1_chromosome_B1	18260447	1.42268e-10
5864466	1		53.8554	0.0686841	-1.16314	228	1.08304		TGCAGTTCTTAGATGATGAAGGTGCGCAAGCTGAACTCTGGGAGCTTTCTCGTGTTTTCTTGGAGACAC	5864466	1.52834e-30	CM007193.1_chromosome_A9	5389698	1.83879e-25	C9	3074297	9.61023e-26	NC_027756.1_chromosome_C9	3074297	9.61678e-26	chrA09	1912996	2	1.63784e-25	CM004491.1_chromosome_B1	18259291	3.68528e-24
5847754	1		53.8554	0.0781797	-1.10691	228	1.01334		TGCAGAAAATTGTTGATTTGAGCAGCAAAATCAAGGTTTCTCCCTTTTCTTTAC	5847754	2.40607e-22	CM007193.1_chromosome_A9	8525843	5.6786e-19		0	999		0	999		0	0	999	CM004491.1_chromosome_B1	18257324	1.91275e-20
5834628	1		53.8554	0.00302355	-2.51948	228	2.90879		TGCAGTGTGCACACGGAATCTGTTGCAGCAAATATAGCACCGATTGCTGTGAATCGAAACACCAACAAA	5834628	1.52834e-30	LFQT01000303.1_Scaffold01555	858	8.49476e-29	C9	2941539	1.60813e-23	NC_027756.1_chromosome_C9	2941539	1.60923e-23	chrC09	1703898	2	1.27512e-21	CM004491.1_chromosome_B1	18098889	1.70251e-27
5831990	1	B01	53.8554	0.0936022	-1.02871	228	0.917679		TGCAGCAGTGTTGTAAGTCTGCACAAAACAACAAATCCAACTCAGCTGCACATCCACAGTTTCAGACGT	5831990	1.52834e-30	CM007195.1_chromosome_B1	17718774	1.42147e-26		0	999		0	999		0	0	999	CM004491.1_chromosome_B1	18092182	6.12331e-27
5847868	1	B01	54.5288	0.0612154	-1.21314	228	1.1456		TGCAGGTAATGTGTTACTGAAACTACTTACAAACCCTTAC	5847868	8.57861e-15	CM007195.1_chromosome_B1	17729142	1.46802e-12		0	999		0	999		0	0	999	CM004491.1_chromosome_B1	18098955	3.05658e-11
5847813	1	B01	54.5288	0.0792012	-1.10127	228	1.00639		TGCAGAGATGCTGAGACTGAAGAGCTGTTTAC	5847813	1.59127e-10	CM007195.1_chromosome_B1	17796238	8.31631e-08		0	999		0	999		0	0	999	CM004491.1_chromosome_B1	18164317	1.08212e-08
5862655	1	B01	54.5288	0.0805419	-1.09398	228	0.997417		TGCAGTGTGCACACGGAATCTGTTGCAGCAAATATAGCACCAATTGCTGCAAATTAC	5862655	5.62783e-24	CM007195.1_chromosome_B1	17729088	1.04114e-21	C9	2941551	7.14793e-16	NC_027756.1_chromosome_C9	2941551	7.1528e-16	chrC09	1703910	2	2.5967e-17	CM004491.1_chromosome_B1	18098901	1.2663e-17
5857407	1	B01	54.5288	0.1457	-0.83654	228	0.689878		TGCAGATTTTGTCACACAGCTCTTTGACAAAGGTTTATATATTCCAGCAATCCGATTAC	5857407	4.58575e-25	CM007195.1_chromosome_B1	17849803	8.55153e-23		0	999		0	999		0	0	999	CM004491.1_chromosome_B1	18113196	3.70783e-23
5863724	1		54.5288	0.163871	-0.785497	228	0.631429		TGCAGAAAAGCTCAAACCTCAAGCTGTGACTTTTTAC	5863724	3.6609e-13		0	999		0	999		0	999		0	0	999	CM004491.1_chromosome_B1	18120844	2.51719e-11
5839306	1		54.5288	0.20014	-0.698667	228	0.534389		TGCAGAATTTGATCCCTAAAAGCTTGAAGCTTGAAGCTCGAAAGCCAGATTGCTCAGGAGAAGATGAAT	5839306	1.52834e-30	CM007195.1_chromosome_B1	17811661	3.0988e-18		0	999		0	999		0	0	999		0	999
5862948|F|0--47:T>G	1	B01	55.2022	0.0364885	-1.43784	228	1.43279		TGCAGAGGCAGATCATGCAATTTGTCATGCATAGTGATAGTTACTTATTTTGAGTCGTTGGTAGTAACT	5862948	1.52834e-30	CM007195.1_chromosome_B1	11325691	8.55507e-24		0	999		0	999		0	0	999	CM004491.1_chromosome_B1	16244520	7.921e-26
5839509	1	B01	55.5389	0.024993	-1.60218	228	1.64817		TGCAGCAGTGTTGTAAGTCTGCACAAAACAACAATCCAACTCAGCTGCACATCCACAGTTTCAGACGTT	5839509	1.52834e-30	CM007195.1_chromosome_B1	17718774	8.49476e-29		0	999		0	999		0	0	999	CM004491.1_chromosome_B1	18092182	3.6593e-29
5839365	1	B01	55.5389	0.0930685	-1.0312	228	0.920694		TGCAGGAAGAAGATCTGAACTTGGAGAATGTATACTACTCAGAGATGAAGGATGCAGGCTTTTTCGATG	5839365	1.52834e-30	CM007195.1_chromosome_B1	17732569	8.49476e-29	C9	2945303	9.61023e-26	NC_027756.1_chromosome_C9	2945303	9.61678e-26	chrC09	1707644	3	1.63784e-25	CM004491.1_chromosome_B1	18102361	3.6593e-29
5848269	1	B01	56.5698	0.386297	-0.413079	228	0.243886		TGCAGTAACCCCACTTTGGGTCAGATCATATTCCATTACATGTAGTTAC	5848269	1.23513e-19	CM007195.1_chromosome_B1	11214277	1.01727e-15		0	999		0	999		0	0	999		0	999
5848305	1		56.9147	0.495703	-0.304779	228	0.150715		TGCAGTGACAAAGTCTATTGCTGAATAGTTTATTTTCAATATATTTAC	5848305	4.28913e-19		0	999		0	999		0	999		0	0	999		0	999
5858104|F|0--14:A>T	1		57.2559	7.45e-05	-4.12784	228	5.27164		TGCAGGATAAAAAAATCTTACCATTCAGTTTAC		999		0	999		0	999		0	999		0	0	999		0	999
5848307	1		57.2559	0.287022	-0.542085	228	0.36864		TGCAGTTTCGTACGAGTACCTCTTTTTGTTTTATTTAC	5848307	1.07441e-13		0	999		0	999		0	999		0	0	999		0	999
5863950|F|0--10:A>G	1	B01	57.5926	0.00216845	-2.66385	228	3.11414		TGCAGGGATAAAATCGTAACTGTCAATCTGTTAC		999	CM007195.1_chromosome_B1	11363149	1.98606e-09		0	999		0	999		0	0	999		0	999
5844513	1		57.761	0.000625856	-3.20353	228	3.8947		TGCAGTATGACAAGGCGAGAGAACCTAATTAGGTTACTCCAAAACAGAATTTAC	5844513	2.40607e-22		0	999		0	999		0	999		0	0	999		0	999
5845153	1		57.761	0.000752826	-3.12331	228	3.77747		TGCAGTTTCTGAGTTCTTTGCTACCGGCAGTATTTTAC	5845153	1.07441e-13	LFQT01000905.1_Scaffold02843	2327	1.66163e-11		0	999		0	999		0	0	999		0	999
5846403	1	B01	57.761	0.0018533	-2.73205	228	3.21169		TGCAGAGATGGTGAAGAGGAACTTGGCGGGGAGAAGTGAGTTAC	5846403	6.15192e-17	CM007195.1_chromosome_B1	20684902	5.10204e-13		0	999		0	999		0	0	999	CM004491.1_chromosome_B1	16380607	4.84985e-15
5858403	1		57.761	0.0064493	-2.19049	228	2.44713		TGCAGTACAATATTTCTTCAGTAAAGGCTTTCTACCTAAGGGTTTAC	5858403	1.48755e-18	LFQT01002853.1_Scaffold03312	2187	1.26111e-14		0	999		0	999		0	0	999		0	999
5851661|F|0--12:A>G	1		57.9293	0.00399509	-2.39847	228	2.73793		TGCAGCAAAGAAACTTCTGTTACTGGGCATTAGACAAAAGATTTATTCTCGATATGAGGTTAC	5851661	3.02152e-27		0	999		0	999		0	999		0	0	999		0	999
5858164|F|0--28:A>C	1	B01	58.6027	0.001124	-2.94924	228	3.52449		TGCAGGCTCATCCTCGTACCTACAGAACACAATAGATTCAACTTCTTAC	5858164	1.23513e-19	CM007195.1_chromosome_B1	21074632	2.18648e-17		0	999		0	999		0	0	999	CM004491.1_chromosome_B1	16734790	9.59315e-18
5853383|F|0--13:A>C	1		58.6027	0.00182358	-2.73908	228	3.22175		TGCAGGAACTTTCAATGCATTTTTTCATTTGCTTTTCTCGAAGTGTTCTTGTGTGTTGTATATGTGAAT	5853383	1.52834e-30	CM007193.1_chromosome_A9	1848500	1.83879e-25		0	999		0	999		0	0	999		0	999
5842147	1		58.9395	0.000730602	-3.13632	228	3.79646		TGCAGAGAGATTCATAATGTGGTCAATTAC	5842147	1.74175e-09		0	999		0	999		0	999		0	0	999	CM004491.1_chromosome_B1	16977980	1.11985e-07
5834808	1		58.9395	0.00184896	-2.73307	228	3.21315		TGCAGTTCTTCTAGTGCAGTTCTTCTAGTTGTTCCAAAATTGCTAAAATTGCAAGGTAGAGGTTTAGCA	5834808	1.52834e-30	CM007193.1_chromosome_A9	1969599	3.05526e-28		0	999		0	999		0	0	999	CM004491.1_chromosome_B1	17038976	6.12331e-27
5856699	1		58.9395	0.00286704	-2.54257	228	2.94152		TGCAGAACCGGCTGAGGATCTAAAGGTTAC	5856699	1.74175e-09		0	999		0	999		0	999		0	0	999	CM004491.1_chromosome_B1	16948919	1.11985e-07
5856699|F|0--11:C>A	1		59.2762	0.00358208	-2.44587	228	2.8047		TGCAGAACCGGCTGAGGATCTAAAGGTTAC	5856699	1.74175e-09		0	999		0	999		0	999		0	0	999	CM004491.1_chromosome_B1	16948919	1.11985e-07
5856700	1		59.2762	0.0813571	-1.0896	228	0.99204		TGCAGAACCGGATGAGGATATAAAGGTTAC	5856700	1.74175e-09	CM007193.1_chromosome_A9	1862767	2.32639e-07		0	999		0	999		0	0	999		0	999
5863966	1		59.2762	0.0912138	-1.03994	228	0.931317		TGCAGGTTCTTTGCCTTGTTGCCATGGAGAAACCTATCTCTCTTAC	5863966	5.15204e-18	CM007202.1_chromosome_B8	68285438	4.33853e-14	C6	22656316	1.0315e-12	NC_027753.1_chromosome_C6	17166115	1.03221e-12	chrC06	15964034	3	1.79791e-12	CM004498.1_chromosome_B8	36940385	1.91044e-14
5864577	1		59.2784	0.00233829	-2.6311	228	3.06742		TGCAGCCAGGTCCCATAGGTAGAGCTTCATCACTGGTCCACTACAATTAC	7250696	7.6899e-17	CM007199.1_chromosome_B5	47187705	2.94624e-16	C3	56515637	1.56582e-16	NC_027750.1_chromosome_C3	56515637	1.56689e-16	chrC03	57130250	2	2.72923e-16	CM004491.1_chromosome_B1	17438835	1.29059e-16
5846481	1		59.6174	0.00105516	-2.97668	228	3.56425		TGCAGCAAAAAAGAATGAATGGCAACTTCAATAAGAACTATGTTTTAC	5846481	4.28913e-19	LFQT01009086.1_Scaffold01020	3391	1.70227e-13		0	999		0	999		0	0	999	CM004491.1_chromosome_B1	17489635	1.54106e-15
5846946	1		60.2863	0.037244	-1.42894	228	1.42125		TGCAGCCGAACCGAATTTTTTAC		999		0	999		0	999		0	999		0	0	999		0	999
5846790	1		62.6432	0.17877	-0.747706	228	0.588804		TGCAGTTTCTGATTCTAAACCCCAAAAACCCTTGTTCTCTCTCTCTCCATTTCTATTTTAC	5846790	3.72679e-26	CM007187.1_chromosome_A3	19563861	1.97388e-14		0	999		0	999	chrA03	13728914	2	1.75817e-14	CM004491.1_chromosome_B1	15842254	3.03012e-24
5863739|F|0--23:T>C	1		63.3166	0.00164636	-2.78347	228	3.28545		TGCAGAAATGATATACTCGGTAGTTCATGGAAGTTGATGTTTAC	5863739	6.15192e-17		0	999		0	999		0	999		0	0	999		0	999
5853701|F|0--58:G>C	1	B01	63.3166	0.00199057	-2.70102	228	3.16726		TGCAGGCAAAAGCAAGAGCTTTGGTCCAAGCAGGTTTAGGGGTAACCAGGAAGATTCTGTTTCTTCTAT	5853701	1.52834e-30	CM007195.1_chromosome_B1	13632384	3.95223e-27	C3	22527005	4.47121e-24	NC_027750.1_chromosome_C3	22527005	4.47425e-24	chrA03	14021739	2	5.89072e-25	CM004491.1_chromosome_B1	13953334	1.70251e-27
5843453	1		63.3166	0.19053	-0.720036	228	0.557971		TGCAGCTATCACATATCTGCTTTGCCGACGATTTAC	5843453	1.24354e-12	LFQT01007037.1_Scaffold01986	7113	1.84238e-10		0	999		0	999		0	0	999		0	999
5863739	1		63.3166	0.190876	-0.719248	228	0.557098		TGCAGAAATGATATACTCGGTAGTTCATGGAAGTTGATGTTTAC	5863739	6.15192e-17		0	999		0	999		0	999		0	0	999		0	999
5862647	1		63.3166	0.298407	-0.52519	228	0.35161		TGCAGTGTAAATATGCTTCCACATATAAGCTCAAGGTATTTTTAGCAATGGTTAC	5862647	6.88654e-23	CM007199.1_chromosome_B5	45911963	2.7331e-17		0	999		0	999		0	0	999		0	999
5854789	1		63.6555	0.200623	-0.697619	228	0.533238		TGCAGTCATCCTCAGAATAATGATGTTGAGATTATGGTATCTTTTAGGTTACTACGCTATTAC	5854789	1.40578e-25		0	999		0	999		0	999		0	0	999		0	999
5858641	1		63.9945	0.0541796	-1.26616	228	1.21252		TGCAGTGGAGAAGAAAGAGGTTTGTGATTTTGCTTTACTTTTTAC	5858641	1.78173e-17	CM007187.1_chromosome_A3	19929963	1.50006e-08	C3	22600029	5.92587e-10	NC_027750.1_chromosome_C3	22600029	5.92991e-10	chrA03	14066232	1	1.33611e-08		0	999
5836990	1	B01	63.9945	0.0549357	-1.26015	228	1.20489		TGCAGAACCTTGATGCAATTCTGCAAAAATAAACAAGCGCAGCTTCTTTATGAGATATCCAAATTGTCT	5836990	1.52834e-30	CM007195.1_chromosome_B1	13625303	3.07695e-23	C3	22534454	1.26088e-14	NC_027750.1_chromosome_C3	22534454	1.26174e-14	chrC03	20629350	1	1.28417e-16	CM004491.1_chromosome_B1	13960269	6.21056e-17
5864024	1	B01	64.1287	0.00065909	-3.18106	228	3.86182		TGCAGTGGTCATATGAATTTTTTTCCAGCTCTATACAAAAACCCACATAAATATTAC	5864024	5.62783e-24	CM007195.1_chromosome_B1	13875788	1.04114e-21		0	999		0	999		0	0	999	CM004491.1_chromosome_B1	13743748	4.5223e-22
5834424	1	B01	64.1287	0.00597371	-2.22376	228	2.49338		TGCAGTGAGGTTACTGGTGTTTGTCTGAAAGAGAAGCAGAAGTAGTTAGAGATTTCATGAAGGAGAGTA	5834424	1.52834e-30	CM007195.1_chromosome_B1	13668058	8.49476e-29	Scaffold00834	58396	4.56711e-09	NW_013617471.1_UnpScaffold00834	58396	4.57023e-09	chrC05	42283923	1	7.78358e-09	CM004491.1_chromosome_B1	13910121	1.72677e-17
5858642	1		64.1287	0.00707084	-2.15053	228	2.3917		TGCAGTGGATAAGAAAGAGATTTGTGATTTTGCTTTACTTTTTAC	5858642	1.78173e-17		0	999		0	999		0	999		0	0	999		0	999
5830665	1	B01	64.1287	0.0255666	-1.59233	228	1.63514		TGCAGACTGTAGATGGAATCAGATCGATAGCTAGTCACGAATGGAACTTTTCCGTGGCCATCAACAGCA	5830665	1.52834e-30	CM007195.1_chromosome_B1	13641550	8.49476e-29		0	999		0	999		0	0	999	CM004491.1_chromosome_B1	13941817	7.921e-26
5862092	1	B01	64.1287	0.0277136	-1.55731	228	1.58896		TGCAGATAACAATGGCGTGACACCGTCTTCGGTCTCAGCGTTAGGCTGCAAGAACATTAC	5862092	1.3077e-25	CM007195.1_chromosome_B1	13664550	2.44758e-23	C3	22496143	1.29564e-18	NC_027750.1_chromosome_C3	22496143	1.29652e-18	chrC03	20603356	1	2.19557e-18	CM004491.1_chromosome_B1	13913671	1.06037e-23
5864540	1		64.4689	0.00441351	-2.35522	228	2.67714		TGCAGATATCCTCGGTGAGTTCTTCAATTTCTTAC	5864540	4.20948e-12		0	999		0	999		0	999		0	0	999		0	999
5854653|F|0--20:A>C	1	B01	64.6702	0.00131579	-2.88081	228	3.42559		TGCAGTATCAATGTGCGAAAAACAAGGAAAATATATCAGACAGAGAAGTAACTAGACATTAC	5854653	1.06146e-26	CM007195.1_chromosome_B1	13546984	2.01441e-19		0	999		0	999		0	0	999	CM004491.1_chromosome_B1	14024335	8.71399e-20
5858641|F|0--9:G>T	1		64.6702	0.00156573	-2.80528	228	3.31679		TGCAGTGGAGAAGAAAGAGGTTTGTGATTTTGCTTTACTTTTTAC	5858641	1.78173e-17	CM007187.1_chromosome_A3	19929963	1.50006e-08	C3	22600029	5.92587e-10	NC_027750.1_chromosome_C3	22600029	5.92991e-10	chrA03	14066232	1	1.33611e-08		0	999
5853972|F|0--45:G>A	1	B01	64.6702	0.0235165	-1.62863	228	1.68319		TGCAGGGGAAGTAGATATATTGGTAGCCGGTGTTGGGACCGGTGGGACAATTTCCGGATCAGGAAAGTT	5853972	1.52834e-30	CM007195.1_chromosome_B1	13561252	3.95223e-27		0	999		0	999		0	0	999		0	999
5857468	1		64.6702	0.0974745	-1.01111	228	0.896359		TGCAGCAAGGTGAACTGCAAGGAGCAAAGGGATTAC		999		0	999		0	999		0	999		0	0	999	CM004491.1_chromosome_B1	14033800	3.91128e-09
5837696	1		64.6702	0.232079	-0.634365	228	0.46473		TGCAGTTGACACTGCTCTTGTTGCTATTCCCTTTCCCCAAATACTCATGAGATAATCCGTATCCAATAT	5837696	1.52834e-30	CM007187.1_chromosome_A3	19906639	2.39552e-19	C3	22581954	7.48191e-22	NC_027750.1_chromosome_C3	22581954	7.48701e-22	chrCnn_random	62387042	3	1.27512e-21		0	999
5837251	1	B01	65.1515	0.0344718	-1.46254	228	1.46489		TGCAGCAGCCGTTATCCATTGCCGCTGCTGCTGTGATCCACTTGCTAGGCATTACCATGCCACCAAGGG	5837251	1.52834e-30	CM007195.1_chromosome_B1	21497377	5.14883e-21	C3	22780823	1.25199e-19	NC_027750.1_chromosome_C3	22780823	1.25284e-19	chrC05	12704763	2	4.58613e-21	CM004491.1_chromosome_B1	14214909	1.02465e-24
5861408	1	B01	65.4916	0.0146395	-1.83448	228	1.95894		TGCAGTCTACAGGTTGAATCCACCTGAATAACTCTCGACTGAGGTGATGATTGTTTGTTTAGTTTTTAC	5861408	1.52834e-30	CM007195.1_chromosome_B1	24563599	1.10667e-22		0	999		0	999		0	0	999	CM004491.1_chromosome_B1	15090120	6.12331e-27
5832435	1		65.8306	0.0466908	-1.33077	228	1.29479		TGCAGCGGATCAAATGGGGCGGAGCCTGCGGGTAAAACCTCATATTCCCATGCTTATTCATAAGTGAAT	5832435	1.52834e-30	CM007190.1_chromosome_A6	22145390	2.42965e-09		0	999		0	999		0	0	999		0	999
5842699	1		65.8306	0.113971	-0.943205	228	0.814931		TGCAGATTGCAAAAGAAAAAGGTTAC		999		0	999		0	999		0	999		0	0	999		0	999
5846082	1	B01	66.1696	0.102839	-0.987842	228	0.868311		TGCAGTCACCAAACTCCCTTGAGCGTCTGTACTCTGAAGTGCGTCTTTTGAAATCATTAC	5846082	1.3077e-25	CM007195.1_chromosome_B1	22845045	4.09566e-21	C3	27843027	6.02802e-17	NC_027750.1_chromosome_C3	27843027	6.03213e-17	chrC03	25556134	2	1.0215e-16	CM004491.1_chromosome_B1	6758997	1.06037e-23
5836937	1	B01	68.7106	0.0367192	-1.43511	228	1.42924		TGCAGAAAAATGGTTTAGCAACCTAACTTAGAAAATTCTAGAAGCAGGTTTCTTTATTTTTAC	5836937	3.02152e-27	CM007195.1_chromosome_B1	24611341	2.06886e-19		0	999		0	999		0	0	999	CM004491.1_chromosome_B1	15139403	4.13158e-23
5846622	1	B01	68.7106	0.152152	-0.817723	228	0.668219		TGCAGGATAAAGCGAGGAAGGAAGAGAGTGTTGAGATCATTAC	5846622	2.12043e-16	CM007195.1_chromosome_B1	23592096	1.74327e-12	C3	28593758	1.21311e-11	NC_027750.1_chromosome_C3	28593758	1.21394e-11	chrA03	17375744	1	2.0086e-11	CM004491.1_chromosome_B1	15236439	7.72906e-13
5859072	1		69.0507	0.0463983	-1.3335	228	1.29828		TGCAGCTCCGACATCGGCTTGTTTAC		999		0	999		0	999		0	999		0	0	999		0	999
5856239	1	B01	69.392	0.205589	-0.687001	228	0.521603		TGCAGGTTGAATCCACCTGAATAACTCTCGACTGAGGTGATGATTGTTTATTTAGTTTTTAC	5856239	1.06146e-26	CM007195.1_chromosome_B1	24563606	7.24511e-19		0	999		0	999		0	0	999	CM004491.1_chromosome_B1	15090127	4.02565e-23
5846048	1		71.1102	0.557309	-0.253904	228	0.111802		TGCAGTAGATCATTACCAAATCAAATGGTTAC	5846048	1.59127e-10		0	999		0	999		0	999		0	0	999		0	999
5851566|F|0--62:T>C	1	B01	71.7928	0.0694117	-1.15857	228	1.07734		TGCAGATTGTAGGTTATATATTGTCTTTACTCATTCATAGTAGGTGAAAGGTGAAGCAGTAGTGTCTTC	5851566	1.52834e-30	CM007195.1_chromosome_B1	21965306	8.49476e-29		0	999		0	999		0	0	999	CM004491.1_chromosome_B1	11118936	3.6593e-29
5858017|F|0--28:T>G	1	B01	71.7928	0.0956452	-1.01934	228	0.906313		TGCAGGAAAGACACCGCCCTTCTCCTGCTTTAC	5858017	4.76465e-11	CM007195.1_chromosome_B1	26553673	3.32342e-07		0	999		0	999		0	0	999	CM004491.1_chromosome_B1	11389062	1.3998e-07
5836884	1		71.7928	0.320829	-0.493726	228	0.320411		TGCAGTTTTCCAGATCTCGATTTAGAGGATACCTGTACCGTAGATTTAGAGTATAGATATAGAACCTGT	5836884	1.52834e-30		0	999		0	999		0	999		0	0	999	CM004491.1_chromosome_B1	11242121	4.76721e-23
5836144	1	B01	71.7928	0.477084	-0.321405	228	0.164172		TGCAGCTGTACAGTAAGTTTTTCCTTGTGTTCTTTGTTGTTATACTCTTATAGATGGAAGTTGAAGCCA	5836144	1.52834e-30	CM007195.1_chromosome_B1	21871776	8.49476e-29		0	999		0	999		0	0	999	CM004491.1_chromosome_B1	11230260	4.76721e-23
5842861	1		72.1295	0.224851	-0.648104	228	0.479442		TGCAGCAAGCATGATAACAAGGACGAGTATATTTTTTGTTTTAC	5842861	6.15192e-17		0	999		0	999		0	999		0	0	999		0	999
5842835	1	B01	72.1295	0.295394	-0.529598	228	0.356034		TGCAGCAACATTTTCTAAGCTCATGCCATCCTCCGCGTCGTTGAATTTAC	5842835	3.55254e-20	CM007195.1_chromosome_B1	26941499	1.37075e-14		0	999		0	999		0	0	999	CM004491.1_chromosome_B1	11694255	6.00454e-15
5863849	1		72.1295	0.341043	-0.467191	228	0.294658		TGCAGCAGTGAAAAATGTCACCGGAATGAGACGCCACTGACGCTGGAATTTTAC	5863849	2.40607e-22	CM007198.1_chromosome_B4	11022223	9.50231e-17		0	999		0	999		0	0	999	CM004491.1_chromosome_B1	11694204	1.91275e-20
5845618	1	B01	72.1295	0.446896	-0.349793	228	0.187907		TGCAGCAACACTTTCTAAGCTCATGCCATCCTCCGCGTCGTTTAC	5845618	1.78173e-17	CM007195.1_chromosome_B1	26941499	3.20144e-15		0	999		0	999		0	0	999	CM004491.1_chromosome_B1	11694255	1.41265e-15
5863849|F|0--6:A>C	1		72.1295	0.574334	-0.240835	228	0.102413		TGCAGCAGTGAAAAATGTCACCGGAATGAGACGCCACTGACGCTGGAATTTTAC	5863849	2.40607e-22	CM007198.1_chromosome_B4	11022223	9.50231e-17		0	999		0	999		0	0	999	CM004491.1_chromosome_B1	11694204	1.91275e-20
5863848	1	B01	72.1295	0.651608	-0.186014	228	0.0661672		TGCAGCCGTGAAAAATGTCACCGGAATGAGACGCCATTGACGCTGAAATTTTAC	5863848	2.40607e-22	CM007195.1_chromosome_B1	26941448	2.04239e-18		0	999		0	999		0	0	999	CM004491.1_chromosome_B1	11694204	1.92633e-15
5838926	1	B01	72.4662	0.248369	-0.604903	228	0.43352		TGCAGATGAACTTGTGCAAGTTGTTGCTAAGGTGTGCTTGCTTTCATCAGAAACATGCGAACTTTTTTC	5838926	1.52834e-30	CM007195.1_chromosome_B1	27070335	1.10667e-22	C3	25576221	4.53492e-14	NC_027750.1_chromosome_C3	25576221	4.53801e-14	chrC03	23463601	1	2.77974e-13	CM004491.1_chromosome_B1	11803113	4.76721e-23
5862109|F|0--18:C>T	1	B01	72.8029	0.130518	-0.884329	228	0.745445		TGCAGATATGCGTTGTTGCCTTCTTGGTTTTCAAAAGAAAGCAGCTCTTAC	5862109	1.02066e-20	CM007195.1_chromosome_B1	27072593	1.83111e-18	C3	25573978	2.10342e-15	NC_027750.1_chromosome_C3	25573978	2.10486e-15	chrC03	23461331	2	3.53048e-15	CM004491.1_chromosome_B1	11805479	2.22687e-19
5831718	1		73.1396	0.325206	-0.487841	228	0.314654		TGCAGCAACTTTGGACCGTCTACCCCGTCAGGTTATCTCATAATCACTGGTTCATTGTGTTAC	5831718	3.02152e-27	CM007191.1_chromosome_A7	22877791	1.24513e-16		0	999		0	999		0	0	999	CM004496.1_chromosome_B6	1449316	8.88026e-25
5857924|F|0--19:C>T	1		73.813	0.138611	-0.858203	228	0.71497		TGCAGCTGGGAAGCTTCACCATAGTAGTCCGTGCGAGGTTCATGCTTAC	5857924	1.23513e-19		0	999	C3	25138555	5.45354e-11	NC_027750.1_chromosome_C3	25138555	5.45726e-11	chrC03_random	1715950	1	9.50552e-11	CM004491.1_chromosome_B1	12253017	9.59315e-18
5850570	1	B01	73.813	0.174683	-0.757749	228	0.600076		TGCAGAGACCAAAAACCTTGTCATGTTCCAAACCAACATGAAGATGAAACCAAGCATCTTAC	5850570	1.06146e-26	CM007195.1_chromosome_B1	27596927	2.01441e-19		0	999		0	999		0	0	999	CM004491.1_chromosome_B1	12249010	1.87295e-21
5836573	1		74.1497	0.169805	-0.77005	228	0.613937		TGCAGTATCAAAACAAATGTTTTCTTGTAGTGAATTTAGAAGTTTTCTTGGAGTTACTGGTTAC	5836573	8.59634e-28		0	999		0	999		0	999		0	0	999		0	999
5836932	1	B01	74.1497	0.25926	-0.586265	228	0.414026		TGCAGAAAAACGAGAGGGCAGCTTGAGCTGGGTTCTTAGCTGTCGCTACAGTGAACCAAATGCCACATT	5836932	1.52834e-30	CM007195.1_chromosome_B1	27619851	3.95223e-27	C3	25118157	7.48191e-22	NC_027750.1_chromosome_C3	25118157	7.48701e-22	chrA03	15702765	2	5.89072e-25	CM004491.1_chromosome_B1	12264261	3.6593e-29
5840072	1		74.1497	0.270295	-0.568163	228	0.395285		TGCAGATGTACCTTGAAATGAGCCCAAGTTAGTCTCCAGTTTGTGAAGCCGCACATCCTGATGTCCTCA	5840072	1.52834e-30		0	999		0	999		0	999		0	0	999	CM004491.1_chromosome_B1	13472463	1.70251e-27
5852443	1	B01	74.1497	0.472639	-0.32547	228	0.167514		TGCAGCCTAACGCAAGAAGATGCCTTGGATTGATGGTTCAAAAATTTGAACAAAGCCCCACACAAGCAA	5852443	1.52834e-30	CM007195.1_chromosome_B1	28257154	1.83879e-25		0	999		0	999		0	0	999	CM004491.1_chromosome_B1	13304479	3.6593e-29
5842459	1	B01	74.1497	0.551112	-0.25876	228	0.115357		TGCAGATATTAGGTTATGTAATTGCCTATCTTGTATTGATCACTCTTAC	5842459	1.23513e-19	CM007195.1_chromosome_B1	23270344	2.18648e-17		0	999		0	999		0	0	999		0	999
5858397|F|0--27:T>A	1		74.4865	0.0971934	-1.01236	228	0.897875		TGCAGTAATTAGCACAATTCCAAAAAATGGTTCAATGGATGTGAGTGATTAC	5858397	2.92937e-21		0	999		0	999		0	999		0	0	999	CM004491.1_chromosome_B1	13324955	2.30934e-19
14757407|F|0--30:A>G	1	B01	74.4865	0.113573	-0.944726	228	0.816741		TGCAGCAAGGAAGGATTCTGCGGCACCACTAAACCTTACTGTGGGCCTGGTTGCCAAAGCCAGTGCGAT	14757407	1.52834e-30	CM007195.1_chromosome_B1	28198145	8.55507e-24		0	999		0	999		0	0	999	CM004491.1_chromosome_B1	13394719	1.70251e-27
5846434	1	B01	74.4865	0.293555	-0.532311	228	0.358764		TGCAGATAATGCATTGTCTCTGGACGGTACCTCATTCATGTCTCGGATTCTTAC	5846434	2.40607e-22	CM007195.1_chromosome_B1	23426551	5.6786e-19	C3	24985866	1.39668e-17	NC_027750.1_chromosome_C3	24985866	1.39763e-17		0	0	999	CM004491.1_chromosome_B1	13510542	2.4743e-19
5846777	1	B01	74.4865	0.39346	-0.4051	228	0.236614		TGCAGTTGCTGATAACAAGACTTGACAAGATTAC	5846777	1.41938e-11	CM007195.1_chromosome_B1	28239147	7.14315e-09	C5	41717618	5.19448e-08	NC_027752.1_chromosome_C5	41717618	5.19802e-08	chrC05	38794920	2	9.05337e-08	CM004491.1_chromosome_B1	13321402	3.30954e-09
5850815|F|0--41:A>G	1	B01	74.4865	0.422021	-0.374666	228	0.20943		TGCAGAGGAGATCTACGGCTTGGTGACTCTGGGTTGTTATCAAACACACACTTATTGGCAGGCCATGCT	5850815	1.52834e-30	CM007195.1_chromosome_B1	23237632	3.98029e-22	Scaffold13119	235	9.67846e-21	NW_013629639.1_UnpScaffold13119	235	9.68506e-21	chrC06	6820448	6	7.67422e-19	LFLV01000243.1scaffold_816.1	76543	1.71459e-22
5858396	1		74.4865	0.791485	-0.101557	228	0.0226781		TGCAGTAATTAGCACAATTCCAAAAAAAAGTTCAACGGATGTGAGTGATTAC		999		0	999		0	999		0	999		0	0	999		0	999
5858397	1		74.739	0.0586215	-1.23194	228	1.16927		TGCAGTAATTAGCACAATTCCAAAAAATGGTTCAATGGATGTGAGTGATTAC	5858397	2.92937e-21		0	999		0	999		0	999		0	0	999	CM004491.1_chromosome_B1	13324955	2.30934e-19
5847881	1		74.739	0.0722568	-1.14112	228	1.05566		TGCAGTCGGAACAGAACAGTCTAAAAAGGATCCATCTATGATCAAATTTAC	5847881	1.02066e-20	LFQT01002376.1_Scaffold02643	6055	3.08584e-11		0	999		0	999		0	0	999	CM004491.1_chromosome_B1	13408238	8.00924e-19
5832362	1		74.739	0.0849017	-1.07108	228	0.969323		TGCAGCGACTTCTGATCTTCCTCTGTATCACTGAAACGCTCTCAGTTATCTCTTCTTCGTTTTAC	5832362	2.44442e-28	CM007196.1_chromosome_B2	4791234	2.16239e-24	C8	25465223	5.30716e-18	NC_027755.1_chromosome_C8	25465223	5.31078e-18	chrC08	23369871	3	9.02476e-18	CM004491.1_chromosome_B1	13292694	9.33566e-25
5854498	1	B01	74.739	0.138532	-0.858451	228	0.715259		TGCAGTACACAATGTTTACGTTTCTCCACTTAGGGGATCAAAGGTAAAGAGATCAAAGTACTTAC	5854498	2.44442e-28	CM007195.1_chromosome_B1	28253018	1.00606e-22		0	999		0	999		0	0	999	CM004491.1_chromosome_B1	13308702	2.00657e-26
5844624	1		74.739	0.141462	-0.849361	228	0.704709		TGCAGTCGAACAAAAAGAGTCTTGTAAGTTAC	5844624	1.59127e-10		0	999		0	999		0	999		0	0	999	CM004491.1_chromosome_B1	13315785	1.08212e-08
5857882	1	B01	74.739	0.152758	-0.815995	228	0.666236		TGCAGCTCTATTTACCTTTGTCTTGTGGAATGTGTGTCCTTGTTATTGACTTTAC	5857882	6.88654e-23	CM007195.1_chromosome_B1	28306094	1.26262e-20		0	999		0	999		0	0	999	CM004491.1_chromosome_B1	13247019	5.49543e-21
5858643	1	B01	74.739	0.191492	-0.717849	228	0.555548		TGCAGTGGATGGTCATGCGAATATGGTGGATCTCCATCTGGTGGCAAGAAACCATTAC	5858643	1.60704e-24	CM007195.1_chromosome_B1	28294029	6.46186e-19	C3	24641340	1.5829e-17	NC_027750.1_chromosome_C3	24641340	1.58398e-17		0	0	999	CM004491.1_chromosome_B1	13262080	1.30467e-17
5831043	1	B01	74.739	0.212017	-0.673629	228	0.507026		TGCAGAGTGTGGAGATAGGAACGGGAGTGTTGCCACTGCTGTCGGATGAAGCGATCCCACCATCGATGC	5831043	1.52834e-30	CM007195.1_chromosome_B1	28290820	1.85185e-20		0	999		0	999		0	0	999	CM004491.1_chromosome_B1	13265274	3.6593e-29
5843580	1		74.739	0.214813	-0.667939	228	0.500849		TGCAGCTGGACAAGCCTGCATGGTGATTTTTCCATCGTTTTTTTGAAGATAATCTTAC	5843580	1.60704e-24		0	999		0	999		0	999		0	0	999	CM004491.1_chromosome_B1	13315069	1.29547e-22
5832281	1		74.739	0.228275	-0.641541	228	0.472402		TGCAGCCTCAAGTTATCAGCCTGCCACCAAGAAATGCCCTATGAACTTCCATTATAGGATATCTCACGA	5832281	1.52834e-30	CM007195.1_chromosome_B1	28258631	6.61348e-25	C3	24899873	4.53492e-14	NC_027750.1_chromosome_C3	24899873	4.53801e-14	chrC03	22967678	1	7.72871e-14	CM004491.1_chromosome_B1	13302989	3.6593e-29
5839374	1		74.739	0.232317	-0.633919	228	0.464254		TGCAGGCAATCGTATCCTGGTGCAGATGATCAGGAACTCCTACTGCACTTGTCATGAAACTCAGGTCCT	5839374	1.52834e-30		0	999		0	999		0	999		0	0	999	CM004491.1_chromosome_B1	13339316	3.6593e-29
5852600	1		74.739	0.281533	-0.550471	228	0.377162		TGCAGCGCCGTGTAATTCATCTAACAATTGATCTATAACGGGAATGGGATACTTGTCAGGAACGGTGGC	5852600	1.52834e-30		0	999		0	999		0	999		0	0	999	CM004498.1_chromosome_B8	17154434	1.71459e-22
5847878	1		74.739	0.290443	-0.536939	228	0.363433		TGCAGTAATTAGCACAATTCCAAAAAAAGTTCAACGGATATGAGTGATTAC		999		0	999		0	999		0	999		0	0	999		0	999
5854498|F|0--12:T>C	1	B01	74.8232	0.180315	-0.743969	228	0.584621		TGCAGTACACAATGTTTACGTTTCTCCACTTAGGGGATCAAAGGTAAAGAGATCAAAGTACTTAC	5854498	2.44442e-28	CM007195.1_chromosome_B1	28253018	1.00606e-22		0	999		0	999		0	0	999	CM004491.1_chromosome_B1	13308702	2.00657e-26
5855029|F|0--42:A>C	1	B01	74.8232	0.180315	-0.743969	228	0.584621		TGCAGTGAGATCATGTACCCTAAACTTTGTGAACAAGAAACCAATAGACGAGACTTTGTGTTCTTAGTT	5855029	1.52834e-30	CM007195.1_chromosome_B1	28302504	3.95223e-27		0	999		0	999		0	0	999	CM004491.1_chromosome_B1	13250594	1.70251e-27
5857882|F|0--41:G>C	1	B01	74.8232	0.180315	-0.743969	228	0.584621		TGCAGCTCTATTTACCTTTGTCTTGTGGAATGTGTGTCCTTGTTATTGACTTTAC	5857882	6.88654e-23	CM007195.1_chromosome_B1	28306094	1.26262e-20		0	999		0	999		0	0	999	CM004491.1_chromosome_B1	13247019	5.49543e-21
5860083|F|0--31:C>A	1	B01	74.8232	0.180315	-0.743969	228	0.584621		TGCAGCAAGGAAGGATATTGTGGCACCACTGCACCTTACTGTGGGAATGGTTGCCAAAGCCAGTGTGAT	5860083	1.52834e-30	CM007195.1_chromosome_B1	28198479	3.07695e-23		0	999		0	999		0	0	999	CM004491.1_chromosome_B1	13394377	3.6593e-29
5852443|F|0--11:G>A	1	B01	74.8232	0.330929	-0.480265	228	0.30728		TGCAGCCTAACGCAAGAAGATGCCTTGGATTGATGGTTCAAAAATTTGAACAAAGCCCCACACAAGCAA	5852443	1.52834e-30	CM007195.1_chromosome_B1	28257154	1.83879e-25		0	999		0	999		0	0	999	CM004491.1_chromosome_B1	13304479	3.6593e-29
5855145|F|0--68:T>A	1	B01	74.8232	0.42174	-0.374955	228	0.209684		TGCAGTGGAAAGCTGTAGAGTAGATAAAGAAAGAATATCAGGCTCATATCCATAATATTCAATAAGTTT	5855145	1.52834e-30	CM007195.1_chromosome_B1	28304475	3.05526e-28	C3	24868673	5.78387e-23	NC_027750.1_chromosome_C3	24868673	5.78781e-23		0	0	999	CM004491.1_chromosome_B1	13248625	1.31612e-28
5861822	1	B01	74.8232	0.446066	-0.350601	228	0.188595		TGCAGCAGTCCAGATGATAACAGCTACGATGATATCAAACTTGACGAAGCTGAAGCATGGCATTTACAG	5861822	1.52834e-30	CM007195.1_chromosome_B1	28320730	8.55507e-24	C3	24841217	2.69097e-21	NC_027750.1_chromosome_C3	24841217	2.69281e-21	chrC03	22904806	2	4.58613e-21	CM004491.1_chromosome_B1	13227216	7.921e-26
5854497	1	B01	74.8232	0.657346	-0.182206	228	0.063857		TGCAGTACACAACGTTTATGTTTCTCCACTTAGGGGATCAAAGGTAAAGAGATCAAAGTACTTAC	5854497	2.44442e-28	CM007195.1_chromosome_B1	28253018	4.64776e-26		0	999		0	999		0	0	999	CM004491.1_chromosome_B1	13308702	4.34346e-23
5857883	1	B01	74.8232	0.786275	-0.104426	228	0.0238543		TGCAGCTCTATTTACCTTTGTCTTGTGGAATGTGTGTCCTTCTTGTTGACTTTAC	5857883	6.88654e-23	CM007195.1_chromosome_B1	28306094	2.7331e-17		0	999		0	999		0	0	999	CM004491.1_chromosome_B1	13247019	1.18955e-17
5852442	1	B01	74.8232	0.836618	-0.0774728	228	0.0137969		TGCAGCCTAACACAAGAAGATGCCTTGAATTGATGGTTCAAAAATTTGAACAAAGCCCCACACAAGCAA	5852442	1.52834e-30	CM007195.1_chromosome_B1	28257154	8.49476e-29		0	999		0	999		0	0	999	CM004491.1_chromosome_B1	13304479	7.921e-26
5846545	1		75.1599	0.798399	-0.0977802	228	0.0211664		TGCAGCCGTTTTTTTTATATGTTATTCCATTAC		999		0	999		0	999		0	999		0	0	999		0	999
5837723	1	B01	75.1599	0.934438	-0.0294495	228	0.00219525		TGCAGTTTGAGATAAGAGTAACATCCTTACTGCTTGACACAGAGCTTTCTCCTGTAGCATCATCGTCAA	5837723	1.52834e-30	CM007195.1_chromosome_B1	28255427	3.95223e-27		0	999		0	999		0	0	999		0	999
5847807	1	B01	75.8367	0.306906	-0.512995	228	0.339435		TGCAGACCAGCACCTGTTCAGGTGAGAGGATTAC	5847807	1.41938e-11	CM007195.1_chromosome_B1	28446270	1.98606e-09	C3	24528501	5.19448e-08	NC_027750.1_chromosome_C3	24528501	5.19802e-08	chrC03	22638683	2	9.05337e-08		0	999
5846788	1		76.5067	0.442105	-0.354474	228	0.191908		TGCAGTTTCATTGCCAAGTTCCTTGAGATCCTCAAATTTCATGACCTGTTATAGCAACAAGATCGGAAG	5846788	1.52834e-30	LFQT01006521.1_Scaffold00106	211812	3.98029e-22	C8	13099182	2.08025e-22	NC_027755.1_chromosome_C8	13099182	2.08167e-22	chrA08	5249066	4	5.89072e-25	LFLV01000514.1scaffold_195.1	203965	6.12331e-27
5865818	1		76.5067	0.601882	-0.220488	228	0.0883426		TGCAGTCACCGATCATCCCGTCGATCAGGGAGATGAACTGCAAGGATAAAATCATATTAC	5865818	6.08414e-24	LFQT01004995.1_Scaffold01374	10371	1.13875e-21		0	999		0	999		0	0	999	LFLV01001128.1scaffold_47.1	981100	4.93342e-22
5843942	1		76.5067	0.63854	-0.194812	228	0.0716149		TGCAGGCAAAAGAAAATTAGCAATGACAATGGCTTGCTATGTTGATTTTATTAC	5843942	2.40607e-22	LFQT01005159.1_Scaffold00055	365201	9.50231e-17		0	999		0	999		0	0	999	CM004498.1_chromosome_B8	969747	1.91275e-20
5837593	1		76.5067	0.774956	-0.110723	228	0.0265201		TGCAGTCAAGGTACTTGTCTAAAACTCCATTTCCTCCTCCTATTTCTTTATGTAAATAGCCTCTAAAAA	5837593	1.52834e-30	LFQT01006521.1_Scaffold00106	211878	4.00855e-17		0	999		0	999		0	0	999	LFLV01000514.1scaffold_195.1	204031	3.6593e-29
5860666	1		76.5067	0.785514	-0.104846	228	0.0240287		TGCAGCTGGTTTCCAAACCATATCGCTTCTGGTCCGTCCCTCGTAACTACATGTCGGTGATTAC	5860666	8.59634e-28		0	999		0	999		0	999		0	0	999	LFLV01001122.1scaffold_554.1	33667	7.09087e-21
5845517	1		76.5067	0.915067	-0.038547	228	0.00368978		TGCAGATATAGGAAAGCTGCATTTGAAACACCACTCAGCTTATTAC	5845517	5.15204e-18		0	999		0	999		0	999		0	0	999		0	999
5859081|F|0--49:A>G	1		76.5067	0.993392	-0.00287952	228	2.23e-05		TGCAGGTTCTTTGTGATATTATGTAAACAGATAGTAAGCAATAGAAAACAAGATTTAC	5859081	1.60704e-24	LFQT01005512.1_Scaffold00125	39923	1.79664e-19		0	999		0	999		0	0	999	LFLV01001999.1scaffold_282.1	191762	7.79673e-20
5842542	1		76.8434	0.13899	-0.857015	228	0.71359		TGCAGATCTTAGCCTTCTCCGCCGCCGATCAAAAGAGGTGTGATTAC	5842542	1.48755e-18		0	999	C2	43406318	1.80453e-10	NC_027749.1_chromosome_C2	43406318	1.80576e-10	chrC02	37431819	1	6.76036e-12		0	999
14789585	1		76.8434	0.144325	-0.840659	228	0.694637		TGCAGTAAGCTCAGTAGCTTCTCTCTGGAGGCCTACAAAAGATGTGTTAC	14789585	3.55254e-20	LFQT01007414.1_Scaffold00569	10891	2.94624e-16		0	999		0	999		0	0	999	LFLV01000695.1scaffold_278.1	286199	1.29059e-16
5844436	1		76.8434	0.169325	-0.771279	228	0.615326		TGCAGTACTTGTCAAGGTACTCTGGTCTTCAACCTTAC	5844436	1.07441e-13	CM007202.1_chromosome_B8	70918484	1.66163e-11		0	999		0	999		0	0	999	CM004494.1_chromosome_B4	22124367	7.49863e-12
5859485	1	B01	76.8434	0.226057	-0.645782	228	0.476948		TGCAGAATCCTGTTCAGACAAAGTATCCAGAGTGAGTCAGACAACAACCTCAGATAGAAAAAAGTTTCG	5859485	7.11069e-29	CM007195.1_chromosome_B1	31065515	8.49476e-29		0	999		0	999		0	0	999	CM004491.1_chromosome_B1	10294373	3.6593e-29
5845582	1		76.8434	0.325687	-0.4872	228	0.314028		TGCAGATTCTGCTTGTGAAGGGATTCATGCATTACTTTTACCCACCTTTTTAC	5845582	8.39926e-22	CM007201.1_chromosome_B7	1094170	1.52442e-19		0	999		0	999		0	0	999	CM004491.1_chromosome_B1	5203958	6.65015e-20
5843645	1		76.8434	0.415241	-0.381699	228	0.215632		TGCAGCTTCCAAATAATATGAACGCTCATACCATTTAC	5843645	1.07441e-13	LFQT01005743.1_Scaffold00040	502082	1.66163e-11		0	999		0	999		0	0	999		0	999
5845854	1		76.8434	0.419926	-0.376827	228	0.211331		TGCAGGACAAAACTTGTCATTATCTAGCAAAAAAAAAAATCTTTTGTTTTTATTAC	5845854	1.96942e-23		0	999		0	999		0	999		0	0	999	CM004491.1_chromosome_B1	10113571	2.63925e-19
5863272|F|0--14:T>C	1	B01	76.8434	0.448985	-0.347768	228	0.186184		TGCAGCTGCAATGTTACCAGAGAACCCAGCGGCAATGCTAATAGCTACCGGAACTAAGGGTCCAACTTC	5863272	1.52834e-30	CM007195.1_chromosome_B1	32245196	5.11253e-26	C6	25215528	9.74717e-16	NC_027753.1_chromosome_C6	14606880	9.75382e-16	chrA05	8057018	2	3.57047e-17	CM004491.1_chromosome_B1	4770950	3.6593e-29
5830838	1	B01	76.8434	0.502533	-0.298836	228	0.145988		TGCAGAGATAATCAATCCTCTTGCAATCGAGCATAGCCTCCTCAAGGGTTTCATCACCAGGGGTACTAA	5830838	1.52834e-30	CM007195.1_chromosome_B1	32085492	8.49476e-29		0	999		0	999		0	0	999	CM004491.1_chromosome_B1	4843702	7.97723e-21
5862269	1		76.8434	0.525973	-0.279037	228	0.130577		TGCAGCCACTACTCGAGCTGCAGAAGAAGCCAACACTACAAGAATATAGGTCTTTAC	5862269	5.62783e-24	LFQT01007196.1_Scaffold00151	377	2.25367e-18		0	999		0	999		0	0	999	LFLV01002430.1scaffold_838.1	24869	9.78907e-19
5861927|F|0--28:C>T	1		76.8434	0.572064	-0.242555	228	0.103633		TGCAGAAGAAGCCAACACTACAAGAATACATGTCTTTAC	5862268	3.1445e-14	LFQT01007196.1_Scaffold00151	377	2.30298e-10		0	999		0	999		0	0	999	LFLV01002430.1scaffold_838.1	24887	1.03468e-10
5853352	1		76.8434	0.604769	-0.21841	228	0.0869449		TGCAGGAAATATTGTCTCATCAAAGTAAACGTGGCGAGAGATGATGTTCTTTCTGGATTTTAC	5853352	3.02152e-27	CM007199.1_chromosome_B5	42910228	5.75219e-20		0	999		0	999		0	0	999	CM004495.1_chromosome_B5	28996684	2.48657e-20
5849346|F|0--55:C>G	1	B01	76.8434	0.622725	-0.205704	228	0.0785639		TGCAGAAAACATGAAAAAGGTAAGAAAATTATTGCATTTATCTTTCGCAATCTTTCAACCCAAAAGGCC	5849346	1.52834e-30	CM007195.1_chromosome_B1	30905276	3.95223e-27	C8	15603229	2.08025e-22	NC_027755.1_chromosome_C8	15603229	2.08167e-22		0	0	999	CM004491.1_chromosome_B1	10132531	7.921e-26
5835496	1	B01	76.8434	0.629658	-0.200895	228	0.0754687		TGCAGAGAAACATAGAACATGCTAGGAACTTGGCAATCGCAAAGCACGCTGAGCTTGTTGAAGCATTGA	5835496	1.52834e-30	CM007195.1_chromosome_B1	30791387	8.55507e-24		0	999		0	999		0	0	999		0	999
5842121	1		76.8434	0.639147	-0.194399	228	0.0713561		TGCAGAGACCTCCTTGGCCTAACATATGACAAAAAGGATTCCATATGGATTAC	5842121	8.39926e-22		0	999		0	999		0	999		0	0	999		0	999
14757899|F|0--7:G>A	1		76.8434	0.641209	-0.193	228	0.0704808		TGCAGCCGCAAGAAGAAAAAGTTCCACACTTTAGATTAGTGTTCCATTGCAATTATCGAACAGTTTACA	14757899	1.52834e-30		0	999	C7	7262311	1.25199e-19	NC_027754.1_chromosome_C7	7262311	1.25284e-19		0	0	999	CM004491.1_chromosome_B1	5231410	2.20233e-26
5858962	1		76.8434	0.688353	-0.162189	228	0.0522053		TGCAGCTTTCAGATCAGTCACCATTATTGAGTCTAAACCCGCAAATCATTAC	5858962	2.92937e-21	LFQT01002315.1_Scaffold01558	5274	5.28698e-19		0	999		0	999		0	0	999	LFLV01001385.1scaffold_956.1	58849	1.07443e-17
5849979|F|0--25:G>T	1	B01	76.8434	0.689387	-0.161537	228	0.0518402		TGCAGAAGTAGTCTGGTTAGGAGTTGATCTCTACCATAAGTGGCTCAAGGTGGATCTAAAAAAACTATC	5849979	1.52834e-30	CM007195.1_chromosome_B1	30822201	8.49476e-29	C7	40448820	9.74717e-16	NC_027754.1_chromosome_C7	40448820	9.75382e-16	chrC07	37122948	2	1.66118e-15	CM004491.1_chromosome_B1	10065246	3.6593e-29
5845452	1	B01	76.8434	0.697475	-0.156471	228	0.0490363		TGCAGAGACCTCCTTGGCCTAACATATGACAAAAGGATTTCATATGGATTAC	5845452	2.92937e-21	CM007195.1_chromosome_B1	30993515	2.45979e-17		0	999		0	999		0	0	999	CM004491.1_chromosome_B1	10227981	6.46642e-15
5861927	1		76.8434	0.698597	-0.155773	228	0.0486544		TGCAGAAGAAGCCAACACTACAAGAATATAGGTCTTTAC	5862269	3.1445e-14	LFQT01007196.1_Scaffold00151	377	2.30298e-10		0	999		0	999		0	0	999	LFLV01002430.1scaffold_838.1	24887	1.03468e-10
5845667	1		76.8434	0.737536	-0.132217	228	0.03644		TGCAGCATCTTCTTGACACGCTCAACAACAGATTCTCAATGAATTAC	5845667	1.48755e-18		0	999		0	999		0	999		0	0	999	CM004491.1_chromosome_B1	531779	1.19132e-16
5859008	1		76.8434	0.739576	-0.131017	228	0.0358544		TGCAGTAGAACTATCTACGGTGAAAAGGTTTTAC	5859008	1.41938e-11		0	999		0	999		0	999		0	0	999		0	999
5835877	1		76.8434	0.756138	-0.121399	228	0.031293		TGCAGCAGGAATCATGTTTCCATCATGAAGACCTCAGAGTGGTCACATCCACATGCTAGCTTTGGCTAA	5835877	1.52834e-30		0	999		0	999		0	999		0	0	999		0	999
5864916	1		76.8434	0.768004	-0.114637	228	0.0282335		TGCAGATACAAGACATACAGTTTGAGGCCAAGACGCTTAC	5864916	8.57861e-15		0	999		0	999		0	999		0	0	999		0	999
5853029|F|0--15:G>C	1		76.8434	0.820324	-0.0860144	228	0.0167365		TGCAGCTGATCTTATGCATGAAGCTTCGAACGCGACTGCTTCACATCCAACTCTGTCTGAAGTTGTAGA	5853029	1.52834e-30	LFQT01006652.1_Scaffold00191	71701	1.83879e-25		0	999		0	999		0	0	999	CM004491.1_chromosome_B1	5390364	3.6593e-29
5859484|F|0--15:C>A	1		76.8434	0.823321	-0.0844307	228	0.0161735		TGCAGAATCCTGTTCCGACAAAGTATCCAGAGTGAGTCAGAAAACAACCTCAGATAGAAAAAAGTTTCG	5859484	1.52834e-30		0	999		0	999		0	999		0	0	999		0	999
5862511|F|0--49:C>T	1		76.8434	0.823321	-0.0844307	228	0.0161735		TGCAGGTCCCATTACACGTTCTGCTAACTCCCTTGTGTAAACAGAAGGTCCAATTTTAC	5862511	4.58575e-25	LFQT01003126.1_Scaffold00816	26936	1.85108e-19		0	999		0	999		0	0	999	CM004494.1_chromosome_B4	16619101	8.02605e-20
5863989|F|0--26:G>A	1		76.8434	0.823321	-0.0844307	228	0.0161735		TGCAGTAGGAGGACAAGTCATATGCAGTGCCATCAGGTTAC	5863989	2.50443e-15		0	999		0	999		0	999		0	0	999	LFLV01002407.1scaffold_561.1	79998	1.93407e-13
5836774	1		76.8434	0.844633	-0.0733319	228	0.0124593		TGCAGTGTTGATCTTTTTTCGGATCCTAAGCGGATTTTGATGTGGTGCAAGCCTCTTCTAACAGAGTTT	5836774	1.52834e-30		0	999		0	999		0	999		0	0	999	CM004491.1_chromosome_B1	4513557	2.8489e-25
5862268|F|0--46:C>T	1		76.8434	0.844833	-0.0732289	228	0.0124268		TGCAGCCACTACTCGAGCTGCAGAAGAAGCCAACACTACAAGAATACATGTCTTTAC	5862268	5.62783e-24	LFQT01007196.1_Scaffold00151	377	2.25367e-18		0	999		0	999		0	0	999	LFLV01002430.1scaffold_838.1	24869	9.78907e-19
5859032	1		76.8434	0.855284	-0.0678898	228	0.0107911		TGCAGTTTTTACTAGGGTGCACACATTTATATACATGTGCCTTTCGTTTAC	5859032	1.02066e-20		0	999		0	999		0	999		0	0	999		0	999
5850798|F|0--47:G>T	1	B01	76.8434	0.891976	-0.0496469	228	0.00598301		TGCAGAGGAAGTTCCATGAACTCGATGGTAAGATGGTTGAGGTCAAAGTGGCCGTCCCCAAGGAAACGT	5850798	1.52834e-30	CM007195.1_chromosome_B1	30826979	3.95223e-27	C8	15682675	1.24316e-24	NC_027755.1_chromosome_C8	15682675	1.24401e-24	chrA08_random	1363805	2	4.5538e-26	CM004491.1_chromosome_B1	10070098	1.70251e-27
5857777|F|0--10:C>T	1	B01	76.8434	0.891976	-0.0496469	228	0.00598301		TGCAGCGGATCTGGTGTCGAAGCAGTTGAGGAAGTGCTAAAAATGAGGCTTTTAC	5857777	6.88654e-23	CM007195.1_chromosome_B1	31224747	7.59904e-18		0	999		0	999		0	0	999	CM004491.1_chromosome_B1	34612	3.3074e-18
5857597|F|0--23:C>T	1		76.8434	0.892208	-0.0495338	228	0.00595715		TGCAGCATAGTTGATCGTCTGATCTTTAGGGATATGTCAAGTGAATGTTTAC	5857597	2.92937e-21		0	999		0	999		0	999		0	0	999		0	999
5857612|F|0--43:G>A	1		76.8434	0.892208	-0.0495338	228	0.00595715		TGCAGCATGCAATCCAAAGATGTGAACTCCAAGGATGAGTAAAGACGTTTCTTGTCGTTAC	5857612	3.72679e-26	LFQT01006652.1_Scaffold00191	71643	3.2566e-22		0	999		0	999		0	0	999	CM004491.1_chromosome_B1	5390430	3.03012e-24
5845511	1		76.8434	0.937276	-0.0281326	228	0.00200894		TGCAGATACCAACCACCAAAAAAAAACATTTTAC		999		0	999		0	999		0	999		0	0	999		0	999
5865705|F|0--41:A>G	1		76.8434	0.965783	-0.0151204	228	0.000596961		TGCAGTGTACTCATGATACATATGCCGATTTCACTTGTCTCACCTACAAGTTACCTTATGTAAGACTCC	5865705	1.52834e-30	LFQT01009405.1_Scaffold00728	17017	8.55507e-24	C6	5362556	1.60813e-23	NC_027753.1_chromosome_C6	34459852	1.60923e-23	chrC03	34304301	8	2.74068e-23	CM004492.1_chromosome_B2	21629015	1.70251e-27
5863271	1	B01	76.8434	0.979217	-0.00912085	228	0.000220135		TGCAGCTGCAATGTCACCAGAGAACCCAGCGGCAATGCTAATAGCTACCGGAACTAAGGGTCCAACTAC	5863271	1.52834e-30	CM007195.1_chromosome_B1	32245196	8.49476e-29	C6	25215528	2.71008e-16	NC_027753.1_chromosome_C6	14606880	2.71193e-16	chrA05	8057018	2	9.92723e-18	CM004491.1_chromosome_B1	4770950	2.20233e-26
5853030	1		76.8434	0.987069	-0.00565263	228	8.52e-05		TGCAGCTGATCTTATCCATGAAGCTTCGAACGCGATTGCTTCACATCCAACTCTGTCTGAAGTTGTAGA	5853030	1.52834e-30	LFQT01006652.1_Scaffold00191	71701	8.49476e-29		0	999		0	999		0	0	999	CM004491.1_chromosome_B1	5390364	7.921e-26
5846182	1	B01	77.1801	0.512558	-0.290257	228	0.139246		TGCAGTGTTCAAAAGCAGACCACTTCACCTTGGCATGTTAC	5846182	2.50443e-15	CM007195.1_chromosome_B1	30917749	4.33674e-13		0	999		0	999		0	0	999	CM004491.1_chromosome_B1	10154286	2.50188e-12
5845715	1	B01	77.1801	0.72339	-0.140627	228	0.0406474		TGCAGCCTCTTCCTCCATGCCTCCGATTAC	5845715	1.74175e-09	CM007195.1_chromosome_B1	31106801	2.32639e-07		0	999		0	999		0	0	999	CM004491.1_chromosome_B1	10326544	1.11985e-07
5858331|F|0--21:G>A	1	B01	77.1801	0.919905	-0.0362569	228	0.00328		TGCAGGTTGACTCGCCATTCTGCAAGAAAAATACATATAGGGTTAC	5858331	5.15204e-18	CM007195.1_chromosome_B1	30699288	9.32507e-16	C8	15903807	8.03062e-09	NC_027755.1_chromosome_C8	15903807	8.0361e-09	chrC08_random	3181268	1	1.39974e-08	CM004491.1_chromosome_B1	9927297	4.10623e-16
5836823	1		77.5168	0.568612	-0.245184	228	0.105508		TGCAGTTCTGAGTAACCATGGTGGATACAGTCACATTGATAGCCTTCAAATCTGATCCAAGCATTTTTA	5836823	1.52834e-30	LFQT01006889.1_Scaffold01509	9083	1.83879e-25		0	999		0	999		0	0	999	CM004498.1_chromosome_B8	8347572	7.921e-26
5840096	1	B01	77.5168	0.921682	-0.0354187	228	0.0031356		TGCAGGTTTTATCTCATTGTGTTAGCTACTGGTTCTTGGTAATATGGCAGTCTACAATCGGTGGGTCAT	5840096	1.52834e-30	CM007195.1_chromosome_B1	30594955	8.49476e-29		0	999		0	999		0	0	999	CM004491.1_chromosome_B1	560361	3.6593e-29
5832660	1		77.8557	0.686954	-0.163072	228	0.0527014		TGCAGCTCCAGGTCTCCTCGGTCCACGACCGACTAATAGTCAGCAAGCGAACATGGCAATGTTCCAACC	5832660	1.52834e-30	LFQT01009533.1_Scaffold00144	70488	8.49476e-29		0	999		0	999		0	0	999	LFLV01000692.1scaffold_577.1	122323	3.6593e-29
5862025	1		77.8557	0.771711	-0.112545	228	0.0273125		TGCAGAGAAAGTTTTTGTTTCTGCGATTTATCATCACAATTTTTTTAC	5862025	4.28913e-19	CM007202.1_chromosome_B8	9854163	3.65879e-15		0	999		0	999		0	0	999	CM004496.1_chromosome_B6	26365931	1.54106e-15
5846670	1		77.8557	0.833917	-0.078877	228	0.0142636		TGCAGGTTCTTATGTAACACACGAGACAAACCATTTCGTTAC	5846670	7.29484e-16	LFQT01007079.1_Scaffold00079	277245	4.59184e-13		0	999		0	999	chrC07	36594722	1	1.90288e-11	CM004492.1_chromosome_B2	2390511	2.04152e-13
5846399	1		78.8692	0.256495	-0.590922	228	0.418878		TGCAGAGATAATCAATCCTCTTGGAATCGAGCATAGCCTCATTAC	5846399	1.78173e-17		0	999		0	999		0	999		0	0	999	CM004491.1_chromosome_B1	4933968	6.57242e-14
5846650	1		78.8692	0.340627	-0.467721	228	0.295167		TGCAGGGCATTCAAAGAAGAAATAGGAAACTCACATTATCTCTTGTTAC	5846650	1.23513e-19	CM007195.1_chromosome_B1	32036373	1.70225e-13		0	999		0	999		0	0	999	CM004491.1_chromosome_B1	4952394	3.47481e-12
5857778	1		78.8692	0.676921	-0.169462	228	0.0563408		TGCAGCGGATTTGGTGTCGAAGCAGTTGAGGAAGTTCTAAAAATGAGGCTTTTAC	5857778	6.88654e-23		0	999		0	999		0	999		0	0	999		0	999
5846751	1		78.8692	0.787694	-0.103643	228	0.0235308		TGCAGTGTGGCTGAAGAACGATGTAAGTTATAAATTAGTTTTTAC	5846751	1.78173e-17		0	999		0	999		0	999		0	0	999		0	999
5843754	1		79.1208	0.273987	-0.56227	228	0.389227		TGCAGGAACCTTCTGTTATAACTAATGCCATTCGTTGATGATCTTAC	5843754	1.48755e-18		0	999		0	999		0	999		0	0	999		0	999
5865667	1		79.1208	0.435839	-0.360674	228	0.197242		TGCAGGTGTGGCTTAGGATCCGTCGTACCGTCATAGACCGGGATTTTAC	5865667	1.23513e-19	LFQT01005931.1_Scaffold00317	84620	1.70225e-13		0	999		0	999		0	0	999	LFLV01002435.1scaffold_2578.1	3628	1.60527e-15
5834859	1		79.1208	0.533529	-0.272842	228	0.125865		TGCAGTTGATTTTGAGGATAAAGGTGTTTCATACATGACAATCCAAATCACAAACTATGACGACCCTAA	5834859	1.52834e-30		0	999		0	999		0	999		0	0	999	CM004491.1_chromosome_B1	14071732	3.6593e-29
5845900	1		79.1208	0.61162	-0.213518	228	0.0836841		TGCAGGCAAAAGAAAATTAGCAATGACAATGGCTTGCTATGTTAC	5845900	1.78173e-17	LFQT01005159.1_Scaffold00055	365210	3.20144e-15		0	999		0	999		0	0	999	CM004498.1_chromosome_B8	969756	5.08079e-15
5842096	1		79.1208	0.673289	-0.171798	228	0.0576932		TGCAGAGAACGATGGTACCTCATATAGACGACTTAC	5842096	1.24354e-12		0	999	C2	17706331	6.13893e-08	NC_027749.1_chromosome_C2	17706331	6.14312e-08	chrCnn_random	67887001	1	9.8764e-08		0	999
5853029	1		79.1208	0.687057	-0.163007	228	0.0526651		TGCAGCTGATCTTATGCATGAAGCTTCGAACGCGACTGCTTCACATCCAACTCTGTCTGAAGTTGTAGA	5853029	1.52834e-30	LFQT01006652.1_Scaffold00191	71701	1.83879e-25		0	999		0	999		0	0	999	CM004491.1_chromosome_B1	5390364	3.6593e-29
5863272	1	B01	79.1208	0.723601	-0.140501	228	0.0405829		TGCAGCTGCAATGTTACCAGAGAACCCAGCGGCAATGCTAATAGCTACCGGAACTAAGGGTCCAACTTC	5863272	1.52834e-30	CM007195.1_chromosome_B1	32245196	5.11253e-26	C6	25215528	9.74717e-16	NC_027753.1_chromosome_C6	14606880	9.75382e-16	chrA05	8057018	2	3.57047e-17	CM004491.1_chromosome_B1	4770950	3.6593e-29
5832131	1		79.1208	0.736902	-0.13259	228	0.0366231		TGCAGCCAAGTAGGAAACGAAGTTCTCCATAGCAGACATATTATGAATATGATCATAGCGAGTATTGGA	5832131	1.52834e-30		0	999		0	999		0	999		0	0	999		0	999
5843285	1		79.1208	0.750102	-0.12488	228	0.0329158		TGCAGCCTTCAGTGATGCAATGAGTTAC	5843285	1.84344e-08		0	999		0	999		0	999		0	0	999		0	999
5831882	1		79.1208	0.784884	-0.105194	228	0.0241736		TGCAGCAGACTCTCACCGTCGACGTCTTGTCTTTGATGAAGGTGATCTCGTGTGGGTTCATTTAC	5831882	2.44442e-28		0	999		0	999		0	999		0	0	999		0	999
5857529	1		79.1208	0.902421	-0.0445909	228	0.00487637		TGCAGCAGAAATGTATGTCTCCGATCCCAGAAGCACCACGCCGTCGCTAGAGACGGTTAC	5857529	1.3077e-25		0	999		0	999		0	999		0	0	999		0	999
5861345	1		79.1208	0.932858	-0.0301845	228	0.00230259		TGCAGTCAATTGCTCTACCACTGAGCTATGGACCCAACTTGACATTATTGTTCACATGTAGTTATACTA	5861345	1.52834e-30	LFQT01005743.1_Scaffold00040	506421	8.49476e-29		0	999		0	999	chrC02	20139733	1	2.14887e-14	CM004491.1_chromosome_B1	661080	7.921e-26
5859484	1		79.1208	0.954252	-0.0203371	228	0.00106764		TGCAGAATCCTGTTCCGACAAAGTATCCAGAGTGAGTCAGAAAACAACCTCAGATAGAAAAAAGTTTCG	5859484	1.52834e-30		0	999		0	999		0	999		0	0	999		0	999
5857777	1	B01	79.1208	0.986229	-0.00602232	228	9.66e-05		TGCAGCGGATCTGGTGTCGAAGCAGTTGAGGAAGTGCTAAAAATGAGGCTTTTAC	5857777	6.88654e-23	CM007195.1_chromosome_B1	31224747	7.59904e-18		0	999		0	999		0	0	999	CM004491.1_chromosome_B1	34612	3.3074e-18
5860679|F|0--5:C>T	1	B01	79.5426	0.334023	-0.476224	228	0.303365		TGCAGCTGTTCATCCAGATTTGATGGTGCCACCGAATGCACCATATGCAAGACTTATATTCGATCTTTT	5860679	1.52834e-30	CM007195.1_chromosome_B1	29499599	1.83879e-25	C4	18339624	1.25199e-19	NC_027751.1_chromosome_C4	18339624	1.25284e-19	chrC07	26860372	11	2.13372e-19	CM004491.1_chromosome_B1	4725059	3.6593e-29
5859961|F|0--48:A>C	1		79.8793	0.857826	-0.0666008	228	0.0104112		TGCAGATGTTCTTAGTTCTATTATGGCACATGCTGAAGCAACACATAGAATTGTTCCGTTAC	5859961	1.06146e-26	LFQT01001312.1_Scaffold00030	645633	2.00021e-24		0	999		0	999		0	0	999	LFLV01001653.1scaffold_821.1	60324	8.65256e-25
5859706|F|0--32:C>T	1		79.8793	0.963729	-0.016045	228	0.000670827		TGCAGAGATCTTCGGGATCGAGAAGTCTATGACGGTGAACAGTGCCAAGGCGACGGTCTGTTGGGAGCT	5859706	7.11069e-29	LFQT01006021.1_Scaffold00279	15128	3.95223e-27		0	999		0	999		0	0	999	CM004491.1_chromosome_B1	9002396	3.6593e-29
5839853	1		80.216	0.723078	-0.140815	228	0.0407431		TGCAGATTGCTAATAAGTACATCTAAGGTATTGGTTGTCTATTATGGTTACTCCTTTTTTAC	5839853	1.06146e-26	LFQT01003706.1_Scaffold00099	152698	3.34706e-22		0	999		0	999		0	0	999	LFLV01000368.1scaffold_369.1	135371	1.44788e-22
5842533	1		80.216	0.801482	-0.0961063	228	0.0205101		TGCAGATCTCAATTGTAGCTAAATTAGAAAAAGGCCTAACGCCATATCTCGCCATTTAC	5842533	4.58575e-25	LFQT01004661.1_Scaffold00007	114655	3.97864e-21		0	999		0	999		0	0	999	LFLV01002366.1scaffold_223.1	128630	1.72509e-21
5865463|F|0--12:A>G	1		80.5527	0.959516	-0.0179476	228	0.000835848		TGCAGGGCTGGAAGGCATTCAAAAAAGAGGTTATTAC	5865463	3.6609e-13	LFQT01007006.1_Scaffold00006	839689	5.54939e-11		0	999		0	999		0	0	999	LFLV01001870.1scaffold_900.1	47622	2.51719e-11
5861524|F|0--25:C>A	1		81.2261	0.640542	-0.193452	228	0.0707632		TGCAGTGGCAAGACCAAGATTACATCTTTCTCCACAAGAATTGGCAGAGTATAAGCGATTGAAACTGTG	5861524	1.52834e-30	LFQT01001804.1_Scaffold00026	759201	8.49476e-29		0	999		0	999		0	0	999	CM004491.1_chromosome_B1	8964741	1.70251e-27
5863540	1		81.2261	0.749362	-0.125308	228	0.0331178		TGCAGTCTAAGCCAGAGATGAGGGCATGCTCCCTCATAGAATAATGGATAGGTAAACCATTAC	5863540	3.02152e-27	LFQT01006488.1_Scaffold00017	649897	2.05427e-24	C2	31870846	1.40361e-18	NC_027749.1_chromosome_C2	31870846	1.40457e-18	chrC06	14347572	14	8.57352e-18	CM004494.1_chromosome_B4	15688126	8.88026e-25
5854353|F|0--12:A>C	1		81.2261	0.924384	-0.0341477	228	0.00292237		TGCAGGTTTCAAATGAATCACTTTGGTTTACCCCAAAATAGAGGTACTGATGTTAGGACTTTTCAAGGG	5854353	1.52834e-30	LFQT01002332.1_Scaffold00165	55048	1.83879e-25		0	999		0	999		0	0	999	CM004495.1_chromosome_B5	15850964	7.921e-26
14772498	1		81.2261	0.962104	-0.0167781	228	0.000732342		TGCAGGTTCAAGGAACCAGCTCAGGTTCCTTGGTTGTAAGTTAC	14772498	6.15192e-17	LFQT01004929.1_Scaffold00273	32649	1.41856e-13	Scaffold02029	2725	2.60724e-13	NW_013618560.1_UnpScaffold02029	2725	2.60902e-13	chrUnn_random	5945511	13	4.54442e-13	LFLV01001977.1scaffold_1313.1	7270	2.25641e-13
5855757	1		81.5628	0.157023	-0.804038	228	0.652548		TGCAGAAAACTTCAAACTTGAGATGGTGATGGCCGTGAATGGGGCAAGAGTTGTTGCTCGCTGGGAGTT	5855757	7.11069e-29	LFQT01009745.1_Scaffold02164	8287	8.49476e-29		0	999		0	999	chrC04_random	3941606	3	1.28417e-16	LFLV01001210.1scaffold_2316.1	1078	1.70251e-27
5834567	1		81.5628	0.407341	-0.390042	228	0.223052		TGCAGTGGTGTAGACGAGTTCGTCGATGTGAGGCAAGGGAAAGGGGTCCTTTGGATAGGACTTGTTTAC	5834567	1.52834e-30	CM007202.1_chromosome_B8	2564153	3.0988e-18		0	999		0	999		0	0	999	LFLV01000305.1scaffold_1418.1	4811	1.03192e-19
5837329	1		81.5628	0.458151	-0.338991	228	0.178767		TGCAGCGCTGTGAGGTTGGGTTGATGGACGGGTAGGTCCACGGGACAGGTCGTCACATAAAGTATGTGA	5837329	1.52834e-30	CM007201.1_chromosome_B7	16605510	8.61581e-19		0	999		0	999		0	0	999	LFLV01000964.1scaffold_5287.1	1050	1.03192e-19
14792882|F|0--29:G>A	1		81.5628	0.509812	-0.29259	228	0.14107		TGCAGTCGTCGTTGTTATCGACGATGATCGGTTAC	14792882	4.20948e-12	CM007193.1_chromosome_A9	2705794	6.07419e-10		0	999		0	999		0	0	999	LFLV01001308.1scaffold_2517.1	1088	2.79102e-10
5863590|F|0--32:T>C	1		81.5628	0.520997	-0.283165	228	0.133747		TGCAGTGTTCTTTGCCTTATCCTTCAAGTTACTGGCCGCCTCGGAGATCGTTTGTGCTCCTTCGTCCGC	5863590	1.52834e-30	LFQT01006488.1_Scaffold00017	62753	8.49476e-29		0	999		0	999	chrC08	6655571	2	1.64947e-20	LFLV01000201.1scaffold_720.1	63330	3.6593e-29
5856690|F|0--10:G>A	1		81.5628	0.525177	-0.279694	228	0.13108		TGCAGAACATGGTCGCAACACTGATACTCATGTGAGACGACGAAGTTAC	5856690	1.23513e-19	LFQT01001509.1_Scaffold00504	53823	1.01727e-15		0	999		0	999		0	0	999	CM004494.1_chromosome_B4	18637913	4.46326e-16
5863588	1		81.5628	0.56169	-0.250503	228	0.109333		TGCAGTGTTCTTTGCCTTATCCTTCAAGTTACCGGCCGCCTCGGAGATCGTTTGTGCTCCTTCGTCTGC	5863588	1.52834e-30	LFQT01006488.1_Scaffold00017	62753	1.83879e-25		0	999		0	999	chrA08	4955153	1	7.67422e-19	LFLV01000201.1scaffold_720.1	63330	7.921e-26
5865713	1		81.5628	0.584523	-0.233198	228	0.0970517		TGCAGACAATGTTCCTCAATATGAAGCTTTCGACCTGAGAGTTTTTAC	5865713	4.28913e-19	LFQT01002477.1_Scaffold00275	1917	7.86406e-17		0	999		0	999		0	0	999	CM004493.1_chromosome_B3	18871257	3.3123e-17
5837676	1		81.5628	0.629216	-0.2012	228	0.0756636		TGCAGTTATTATTGGGCAGGTGCGTTTCTAGCGGCAGTGTCTTTCGGTCCTCCCTTTAGTGCAGCTTTT	5837676	1.52834e-30		0	999		0	999		0	999		0	0	999		0	999
5865429|F|0--49:A>G	1		81.5628	0.652474	-0.185437	228	0.0658154		TGCAGCTACAAGAACATTGGCTGACTACAACCGTCCAGATCAGTTCTATACCCACAGATCAGCCATTCG	5865429	1.52834e-30	LFQT01005072.1_Scaffold00203	79532	3.95223e-27	C9	30336043	3.48099e-20	NC_027756.1_chromosome_C9	30336043	3.48337e-20	chrC09	26353798	14	5.93254e-20	CM004498.1_chromosome_B8	213265	1.70251e-27
5847816	1		81.5628	0.683958	-0.164971	228	0.0537736		TGCAGATACTCTACAATTCTCTAAAGGATGCCAAACTTCAAATAATTTATCATACCATTAC	5847816	3.72679e-26		0	999		0	999		0	999		0	0	999		0	999
5836952	1		81.5628	0.834906	-0.0783626	228	0.0140919		TGCAGAAACGTGATGGTGATGATGCCCCTACCATTATTCCCTCTGTAACTGACATAACCAACGTCTCCA	5836952	1.52834e-30		0	999		0	999		0	999		0	0	999		0	999
5836764	1		81.5628	0.838727	-0.0763794	228	0.0134381		TGCAGTGTCTGACTTCTCCATCCGCGACCTCGATCTACCGCAGGTTTCCGACGATTTGATCAACCAAGC	5836764	1.52834e-30	LFQT01009609.1_Scaffold00263	92901	8.49476e-29		0	999		0	999		0	0	999	CM004494.1_chromosome_B4	12938614	1.31612e-28
14780376	1		81.5628	0.841457	-0.0749681	228	0.0129809		TGCAGCAGCTTGCTCTCTCATCTCCTTAGCCGACGAGCTGCTCGTGGTAGACGCCATTTTCTTAGCCTC	14780376	1.52834e-30		0	999		0	999		0	999		0	0	999		0	999
5865428	1		81.5628	0.85927	-0.0658701	228	0.0101985		TGCAGCTACAAGAACATTGGCTGACTACAACCGTCCAGATCAGTTCTATGCCCACAGATCAGCCATTCT	5865428	1.52834e-30	LFQT01005072.1_Scaffold00203	79532	3.05526e-28	C9	30336043	5.82493e-18	NC_027756.1_chromosome_C9	30336043	5.82891e-18	chrC09	26353798	14	9.92723e-18	CM004498.1_chromosome_B8	213265	1.31612e-28
5854675	1		81.5628	0.874807	-0.058088	228	0.00805321		TGCAGTATGCACTATTTCGATTCCCTTCTTAGAAACTCCATAGAACTCCCCAAGTCGTAATGATAAGGC	5854675	1.52834e-30		0	999		0	999		0	999		0	0	999	LFLV01002393.1scaffold_67.1	597797	7.921e-26
5855525|F|0--23:G>A	1		81.5628	0.878142	-0.0564354	228	0.00762648		TGCAGTTGGGGTCGGAGTCCTCCGATGAAACGTGAGACTAGCTGTACCTGACTGTCATGTATCTCGTTT	5855525	1.52834e-30	LFQT01002854.1_Scaffold00018	31998	1.83879e-25		0	999		0	999		0	0	999		0	999
5865256	1		81.5628	0.889054	-0.0510716	228	0.00631315		TGCAGCATGGAGCGGGCACTCCTTGCCAAAATCTGAGATATATGGAAAGTTTCATTAC	5865256	1.60704e-24	LFQT01004661.1_Scaffold00007	833010	2.98522e-22		0	999		0	999		0	0	999	CM004498.1_chromosome_B8	10435011	4.69242e-17
5836908	1		81.5628	0.949265	-0.0226127	228	0.00131342		TGCAGCGCTGTGAGGCTGGGTTGATGGGACGGGTAGGTCCACGGGACAGGTCGTCACAGATTCGTCGTC	5836908	1.52834e-30	CM007200.1_chromosome_B6	406435	1.85185e-20		0	999		0	999		0	0	999	LFLV01000964.1scaffold_5287.1	1050	2.21797e-21
5865630	1		81.5628	0.992227	-0.003389	228	3.08e-05		TGCAGATCATACTCATCTTTCCATCAAAATCAGTGATCAATCTTCGATTTCCCGTAAAAGCTTGATTTA	5865630	1.52834e-30	LFQT01004294.1_Scaffold00156	35676	3.95223e-27		0	999		0	999		0	0	999	CM004493.1_chromosome_B3	21076049	1.70251e-27
5865429	1		81.8996	0.529136	-0.276433	228	0.12859		TGCAGCTACAAGAACATTGGCTGACTACAACCGTCCAGATCAGTTCTATACCCACAGATCAGCCATTCG	5865429	1.52834e-30	LFQT01005072.1_Scaffold00203	79532	3.95223e-27	C9	30336043	3.48099e-20	NC_027756.1_chromosome_C9	30336043	3.48337e-20	chrC09	26353798	14	5.93254e-20	CM004498.1_chromosome_B8	213265	1.70251e-27
14770266	1		82.2363	0.219506	-0.658554	228	0.490695		TGCAGGGATCAATGAGGTTGATGGTTTAGACGGCCAAGAGGAGATGTGCTTCATCAATGTTAC	14770266	3.02152e-27	LFQT01006938.1_Scaffold00111	155172	1.23635e-21	C4	23536649	3.90256e-19	NC_027751.1_chromosome_C4	23536649	3.90522e-19	chrC04_random	2287487	1	6.62774e-19	LFLV01001992.1scaffold_329.1	231832	5.34454e-22
5848216	1		82.2363	0.417326	-0.379524	228	0.213709		TGCAGGTTGGACAGCCACTACAAGAAAACATGAGGTTAC	5848216	3.1445e-14		0	999		0	999		0	999		0	0	999		0	999
5857319|F|0--19:G>A	1		82.2363	0.579829	-0.2367	228	0.0994982		TGCAGATGTAAAACTTATGGTAGCATTAC	5857319	5.69496e-09	LFQT01009274.1_Scaffold00063	356020	7.17188e-07		0	999		0	999		0	0	999	LFLV01001402.1scaffold_500.1	4933	3.52423e-07
5844626	1		82.2363	0.605651	-0.217778	228	0.0865207		TGCAGTCGAACCTGTACACTATAGAACAAAACTTTAC	5844626	3.6609e-13		0	999		0	999		0	999		0	0	999		0	999
5842840	1		82.2363	0.632256	-0.199107	228	0.0743286		TGCAGCAACCCACATCGAATTAC		999		0	999		0	999		0	999		0	0	999		0	999
5855979|F|0--28:C>G	1		82.2363	0.728633	-0.137491	228	0.0390581		TGCAGCTGATGGGTTATCCAGAATTGATCACTCAACGGAGCTCTCGTCTTGTACTACTCTGTTTGCTTT	5855979	1.52834e-30	LFQT01004128.1_Scaffold00113	122681	3.95223e-27		0	999		0	999		0	0	999	CM004491.1_chromosome_B1	5557141	1.70251e-27
5844258	1		82.2363	0.773032	-0.111803	228	0.0269886		TGCAGGTGTTATGTCAGGACCTAAGGGCGACGAAGCGTTGGCAGACTTTAC	5844258	1.02066e-20	LFQT01005495.1_Scaffold00515	21211	1.83111e-18		0	999		0	999		0	0	999	CM004496.1_chromosome_B6	8445982	8.00924e-19
5848191	1		82.2363	0.815204	-0.0887337	228	0.0177219		TGCAGAGTGTGGGAACCGAAATTCGCACCGTCAAATTAC	5848191	3.1445e-14	LFQT01004371.1_Scaffold00499	56221	2.30298e-10	C2	11465868	7.55561e-08	NC_027749.1_chromosome_C2	11465868	7.56076e-08		0	0	999	LFLV01000261.1scaffold_130.1	484036	1.03468e-10
5862727	1		82.2363	0.857408	-0.0668124	228	0.0104732		TGCAGTCAGATTGGAACATTGATTAC		999		0	999		0	999		0	999		0	0	999		0	999
5857290|F|0--17:T>C	1		82.2363	0.894288	-0.0485227	228	0.00572815		TGCAGATGCAAACACCGTGATACTTGACCAGATTAC	5857290	1.24354e-12	CM007197.1_chromosome_B3	59072859	2.38327e-09		0	999		0	999		0	0	999	LFLV01001803.1scaffold_1596.1	17901	1.08748e-09
5857290	1		82.2363	0.896634	-0.0473846	228	0.00547524		TGCAGATGCAAACACCGTGATACTTGACCAGATTAC	5857290	1.24354e-12	CM007197.1_chromosome_B3	59072859	2.38327e-09		0	999		0	999		0	0	999	LFLV01001803.1scaffold_1596.1	17901	1.08748e-09
5852722|F|0--30:A>G	1	B01	82.573	0.842626	-0.0743654	228	0.0127877		TGCAGCGTGCAGGATTGCGGGATTACTAAAAATGCTTGGATGTTAGCCAAGAGACCAATTTTGGGACCT	5852722	1.52834e-30	CM007195.1_chromosome_B1	29955726	8.49476e-29		0	999		0	999		0	0	999	LFLV01000725.1scaffold_1031.1	24111	7.921e-26
5834443	1		83.5831	0.63875	-0.194669	228	0.0715251		TGCAGTGATCAATGAAGTTGATGGTCTAGAGGGTCAGGAAGAGCTATGCTTTGTGAATGTTAC	5834443	3.02152e-27	CM007202.1_chromosome_B8	43793107	5.75219e-20		0	999		0	999		0	0	999	CM004498.1_chromosome_B8	17908684	2.48657e-20
14785405	1		83.5831	0.91973	-0.0363395	228	0.00329439		TGCAGAAACACGAAAGATAAAAGGAAATTAGTTTCCCGATAAACACCAACTTAC	14785405	2.40607e-22	LFQT01004560.1_Scaffold00382	64390	7.34574e-18		0	999		0	999		0	0	999	LFLV01001644.1scaffold_344.1	63518	3.20071e-18
5866229	1		84.9299	0.39688	-0.401341	228	0.233208		TGCAGCAGGCTCAGCTTCTGGATCAGGGATTGCAGCCCCCTGAGCATTAC	5866229	3.55254e-20	LFQT01000449.1_Scaffold00667	10422	1.37075e-14	C4	17389301	4.41561e-07	NC_027751.1_chromosome_C4	17389301	4.41862e-07	chrC04	16787553	1	7.6964e-07	LFLV01000261.1scaffold_130.1	44781	6.00454e-15
19818809	1		84.9299	0.477502	-0.321025	228	0.163861		TGCAGTCCCATAACTGATCAGAACAAGCTGAGATCAACAAAACAGAAACTTGCTGTGGTTAC	19818809	1.06146e-26		0	999	C6	26549607	6.31806e-22	NC_027753.1_chromosome_C6	13272808	6.32236e-22	chrCnn_random	6649145	7	1.07226e-21	CM004492.1_chromosome_B2	25863790	5.2075e-22
5865302	1	B01	84.9299	0.631464	-0.199651	228	0.0746749		TGCAGCACCTTCCAGGAATCCGGGAGGACTTCATCCAGATTTGATGGTGCCACCCAATGCTCCCTATGC	5865302	1.52834e-30	CM007195.1_chromosome_B1	30086442	4.00855e-17		0	999		0	999		0	0	999	LFLV01002393.1scaffold_67.1	1050283	1.72677e-17
5863404|F|0--17:C>A	1		84.9299	0.980086	-0.00873565	228	0.000202109		TGCAGGGATAGACATAACGGATACAAACGTGACGTGTTCGTGGATGTTGCAGGTCTGTTTTTCTTTTGT	5863404	1.52834e-30	LFQT01005092.1_Scaffold01163	11482	3.95223e-27	C7	35597642	4.50295e-19	NC_027754.1_chromosome_C7	35597642	4.50602e-19	chrA04_random	1117120	5	7.67422e-19	CM004494.1_chromosome_B4	12831457	1.70251e-27
5856918|F|0--13:C>T	1		86.2767	0.640123	-0.193737	228	0.0709412		TGCAGACATCCAGCTAGATCAAGGCATTTGAGGCATTCGAGGTTAC	5856918	5.15204e-18	LFQT01004661.1_Scaffold00007	1342412	9.32507e-16		0	999		0	999		0	0	999	LFLV01001155.1scaffold_1170.1	14404	1.91044e-14
5839900	1		86.9501	0.604277	-0.218764	228	0.0871823		TGCAGTCACTGAAGATGTCTTGCTTGACCCTCTGACCAGGTTGTTTCCTCTTATATATTTAC	5839900	1.06146e-26	CM007193.1_chromosome_A9	14772700	2.00021e-24		0	999		0	999		0	0	999		0	999
5844069	1		86.9501	0.693271	-0.159097	228	0.0504827		TGCAGGGCCGGTGTAGGTCGACCAATTTTAC	5844069	5.28297e-10		0	999		0	999		0	999		0	0	999		0	999
5866070|F|0--6:A>C	1		86.9501	0.69571	-0.157572	228	0.0496406		TGCAGTAAGCATCATGGCTATAGACACTGCTGAATTATTAGGATTAC	5866070	1.48755e-18	LFQT01004661.1_Scaffold00007	1187175	2.71057e-16		0	999		0	999		0	0	999	LFLV01000654.1scaffold_327.1	160159	1.19132e-16
5866065|F|0--28:A>G	1		86.9501	0.826547	-0.0827322	228	0.0155787		TGCAGTCAGCATTATGGCTATAGACACTACTGAAGTATTAGGATTAC	5866065	1.48755e-18	LFQT01004661.1_Scaffold00007	1821213	2.71057e-16		0	999		0	999		0	0	999	LFLV01002489.1scaffold_996.1	22282	1.19132e-16
5842864	1		86.9501	0.990695	-0.00406004	228	4.41e-05		TGCAGCAAGCTTTCTCCACCCTGCGTAAGTATAACATTAC	5842864	8.57861e-15		0	999		0	999		0	999		0	0	999		0	999
5852290	1		87.2868	0.222795	-0.652094	228	0.483732		TGCAGCCACTTCACTTACAAACTTTGAAGCTCCTCTCTCATAAGCAAGATCAACTCTTCGGTGACATGA	5852290	1.52834e-30	LFQT01002004.1_Scaffold00034	75219	1.83879e-25	C7	12246427	9.81637e-11	NC_027754.1_chromosome_C7	12246427	9.82307e-11	chrCnn_random	20503097	1	1.67297e-10	LFLV01002393.1scaffold_67.1	966744	7.921e-26
5852290|F|0--38:C>G	1		87.6235	0.618992	-0.208315	228	0.0802625		TGCAGCCACTTCACTTACAAACTTTGAAGCTCCTCTCTCATAAGCAAGATCAACTCTTCGGTGACATGA	5852290	1.52834e-30	LFQT01002004.1_Scaffold00034	75219	1.83879e-25	C7	12246427	9.81637e-11	NC_027754.1_chromosome_C7	12246427	9.82307e-11	chrCnn_random	20503097	1	1.67297e-10	LFLV01002393.1scaffold_67.1	966744	7.921e-26
19818941	1		87.6235	0.822626	-0.0847977	228	0.0163032		TGCAGGACATTACTTTAGACATGATGGCTTTCTTTTCTATGATAACCGGCTTTGTGTGCCTAATTGTTC	19818941	1.52834e-30	LFQT01006944.1_Scaffold00180	9568	8.49476e-29		0	999		0	999		0	0	999	CM004497.1_chromosome_B7	11969433	3.6593e-29
5861062	1		89.307	0.731523	-0.135772	228	0.038197		TGCAGGGCTATAGAGAGCAACAAACATAATAAGACAATTGTCAACATTCCAAACACATTGTTAC	5861062	8.59634e-28	CM007188.1_chromosome_A4	27064937	1.64141e-20		0	999		0	999		0	0	999	CM004491.1_chromosome_B1	8060760	1.97153e-21
5861062|F|0--9:A>C	1		89.307	0.955359	-0.0198335	228	0.00101654		TGCAGGGCTATAGAGAGCAACAAACATAATAAGACAATTGTCAACATTCCAAACACATTGTTAC	5861062	8.59634e-28	CM007188.1_chromosome_A4	27064937	1.64141e-20		0	999		0	999		0	0	999	CM004491.1_chromosome_B1	8060760	1.97153e-21
5856502	1		89.6437	0.51524	-0.287991	228	0.137481		TGCAGTGAAAGGTGAAACAAAAAGAGTGTTACTTACTCCATATCACTAAAGGCAAGTAGTTAGAACTTA	5856502	1.52834e-30	CM007188.1_chromosome_A4	27376719	1.83879e-25		0	999		0	999		0	0	999	CM004491.1_chromosome_B1	7854472	3.6593e-29
5839955	1		89.6437	0.972143	-0.0122698	228	0.000395581		TGCAGCTCTTCACTTTCCCTGAAGCGATAAGCATTAGCAGAAGATCGCCTGAGAAGCTGTTCAAGATTC	5839955	1.52834e-30	CM007188.1_chromosome_A4	27278407	8.49476e-29	C2	18945752	2.08025e-22	NC_027749.1_chromosome_C2	18945752	2.08167e-22	chrC02	15754089	1	3.5453e-22	CM004491.1_chromosome_B1	7909958	3.6593e-29
5831575	1		89.9815	0.192715	-0.715085	228	0.552489		TGCAGATTTGAGTCCGGCATGGAGAGCTAGTGCTTCCGCTACCAGAGGAGAGCTTTTTTGCACACTTAC	5831575	1.52834e-30		0	999		0	999		0	999		0	0	999	CM004491.1_chromosome_B1	7505808	6.12331e-27
5855051|F|0--44:A>G	1		91.6707	0.216742	-0.664058	228	0.496645		TGCAGTGATACTAATACATGAGTCAAAGAGAAAGATTGTACACAACAACTCTAAGGCCATGAAAGTGAC	5855051	1.52834e-30	LFQT01004271.1_Scaffold00073	175981	3.95223e-27		0	999		0	999		0	0	999	CM004491.1_chromosome_B1	3566484	1.70251e-27
5839382	1		91.6707	0.262155	-0.581442	228	0.409014		TGCAGGGTCTCTCTAAGTCATATCTCTTCTCTCCACTTGCCTATTTATCATAGTCAACGATCGGTTTCT	5839382	1.52834e-30	LFQT01003367.1_Scaffold09661	589	8.55507e-24		0	999		0	999		0	0	999	LFLV01000976.1scaffold_873.1	68406	7.921e-26
5837252	1		91.6707	0.373145	-0.428123	228	0.257752		TGCAGCAGCCTCCTCAGCATCTCGTCCCAAACGATTATAGCTATAACACAGAGAATCTCCATTAC	5837252	2.44442e-28	CM007194.1_chromosome_A10	18961001	1.00606e-22	C9	51608249	1.47559e-18	NC_027756.1_chromosome_C9	51608249	1.47659e-18	chrA10	15350412	1	3.24588e-17	CM004498.1_chromosome_B8	28466216	3.38154e-19
5863338|F|0--51:A>G	1		91.6707	0.374908	-0.426075	228	0.255853		TGCAGGAATGTGGGTTGGCATTGGTCTAGTATCATCAGCATTACGGAAACCATCATCATTCCCACACCA	5863338	1.52834e-30	LFQT01005512.1_Scaffold00125	144169	3.95223e-27	C8	3340170	4.47121e-24	NC_027755.1_chromosome_C8	3340170	4.47425e-24	chrC08	3830188	2	7.62012e-24	LFLV01001999.1scaffold_282.1	296403	1.70251e-27
5858481|F|0--24:A>T	1		92.0074	0.0421163	-1.37555	228	1.35226		TGCAGTATGCATCTTCTTGCAATTATATAGTTAC	5858481	1.41938e-11	LFQT01003716.1_Scaffold00141	177414	1.98606e-09		0	999		0	999		0	0	999	LFLV01001402.1scaffold_500.1	57956	9.20176e-10
5839394	1		92.0074	0.183747	-0.73578	228	0.575475		TGCAGTAATCACCTTCCCATGTTACCAAATACATGTTGTCTGAGAACAATATCCCTTTCATGCTCTTCT	5839394	1.52834e-30		0	999		0	999		0	999		0	0	999		0	999
14793150	1		92.0074	0.200047	-0.698869	228	0.534611		TGCAGGACATTCGCCGAAAACCTGGTCGGAACAGCCCTCGAATGGTTCTCCGGGCTTGAGCCAAATTCG	14793150	1.52834e-30	LFQT01004871.1_Scaffold00301	36561	3.95223e-27		0	999		0	999		0	0	999	LFLV01001368.1scaffold_904.1	71417	1.70251e-27
5863352|F|0--63:T>C	1		92.0074	0.258963	-0.586762	228	0.414543		TGCAGGAGCTACAGGCATCCAGAGGGAGCACTCATCGCTATCAAGAGAATGTTGACCATTACCTTCTCC	5863352	1.52834e-30	LFQT01006619.1_Scaffold00023	506417	2.37863e-24	C6	37396795	5.78387e-23	NC_027753.1_chromosome_C6	2425613	5.78781e-23	chrC06	2403779	3	9.85725e-23	CM004496.1_chromosome_B6	2704284	1.70251e-27
5866254	1		92.0074	0.272622	-0.56444	228	0.391455		TGCAGCAGCGTCAACTTATAGATCAGGGATTGCAGCCCCCTGATCATTAC	5866254	3.55254e-20	LFQT01003465.1_Scaffold00248	71203	2.94624e-16		0	999		0	999		0	0	999	LFLV01000850.1scaffold_2160.1	6813	2.79364e-13
5861000|F|0--15:C>T	1		92.0074	0.291614	-0.535192	228	0.361668		TGCAGGCTCCTCTTGCTTTTGGTCTCCAACAACGTTCATCTGCTCTTGCTTAGCCTTCTCTGAAAAAAT	5861000	1.52834e-30	LFQT01003706.1_Scaffold00099	29756	1.83879e-25		0	999		0	999		0	0	999	LFLV01000368.1scaffold_369.1	24702	7.921e-26
5866087	1		92.0074	0.340216	-0.468245	228	0.295671		TGCAGTCACCGGAACAGAGCTCTGGTAAGTTTGCCGGAGAGTTTCGGAGGATCCTCAATAACTGCAAGC	5866087	1.52834e-30	LFQT01004871.1_Scaffold00301	28658	3.95223e-27		0	999		0	999		0	0	999	LFLV01000940.1scaffold_903.1	26653	1.70251e-27
5852611|F|0--6:G>T	1		92.0074	0.346117	-0.460777	228	0.288514		TGCAGCGCTGTGAGACTGGGTAGACGGACGGGTAGGTCCACGGGACAGGTCGTCATCAATTGGTGACAG	5852611	1.52834e-30	CM007201.1_chromosome_B7	23803972	1.43157e-21		0	999		0	999		0	0	999	CM004491.1_chromosome_B1	3975011	4.73361e-28
5847838	1		92.0074	0.364247	-0.438604	228	0.267529		TGCAGCCAGATTTGAGCTGAAAGTAATACAAAATACTGCACAAGAAATTGTTAC	5847838	2.40607e-22	LFQT01001312.1_Scaffold00030	155602	2.04239e-18		0	999		0	999		0	0	999	CM004491.1_chromosome_B1	4258978	8.89915e-19
14771531	1		92.0074	0.399478	-0.398507	228	0.230649		TGCAGATCAATTGGTGACAGCTTATCCTGTGGGAGAGTTATTAC	14771531	6.15192e-17	CM007195.1_chromosome_B1	8300212	2.37375e-11		0	999		0	999	chrA03	11921562	2	4.57668e-08	CM004491.1_chromosome_B1	22437500	1.04981e-11
5849588|F|0--17:A>G	1		92.0074	0.485581	-0.313739	228	0.157925		TGCAGAAAGGGTGTTATACTGCTGAGTTAGCTCATAAATATGTTGTTGCAGTTGCTTACCTCATTACAG	5849588	1.52834e-30	LFQT01001312.1_Scaffold00030	358970	3.95223e-27		0	999		0	999		0	0	999	CM004491.1_chromosome_B1	4069453	1.70251e-27
5865794|F|0--28:T>G	1		92.0074	0.521586	-0.282674	228	0.133369		TGCAGCATTTGGACCCAGATCACGAGATTCCCACGCCCAACCTTGTATCTCTCTTTGCCCAGCACCTGG	5865794	1.52834e-30	LFQT01004294.1_Scaffold00156	6450	8.49476e-29		0	999		0	999		0	0	999	CM004493.1_chromosome_B3	21053874	3.6593e-29
5861000	1		92.0074	0.529361	-0.276248	228	0.128449		TGCAGGCTCCTCTTGCTTTTGGTCTCCAACAACGTTCATCTGCTCTTGCTTAGCCTTCTCTGAAAAAAT	5861000	1.52834e-30	LFQT01003706.1_Scaffold00099	29756	1.83879e-25		0	999		0	999		0	0	999	LFLV01000368.1scaffold_369.1	24702	7.921e-26
5859168	1		92.0074	0.550597	-0.259166	228	0.115656		TGCAGATAACCACAAAACGCCGAACCCATTAGCTTGATATCTTCTTATTGGTCTTTAC	5859168	1.60704e-24		0	999		0	999		0	999		0	0	999		0	999
5854424	1		92.0074	0.56269	-0.249731	228	0.108775		TGCAGTAACAGTGGACGTAATTTCTGTATAATCCAGAAGCTCGGGTTTAGCTGAAAACCCTAATGCATC	5854424	7.11069e-29	LFQT01009533.1_Scaffold00144	105505	3.95223e-27		0	999		0	999		0	0	999	LFLV01000692.1scaffold_577.1	88325	1.70251e-27
5818041|F|0--18:A>T	1		92.0074	0.576479	-0.239216	228	0.101269		TGCAGCTTCATAGAGAAAATTGTTGAGGAAGGCGGTTTTAC		999	LFQT01000760.1_Scaffold00848	2975	4.33674e-13		0	999		0	999		0	0	999	LFLV01000201.1scaffold_720.1	13782	1.93407e-13
5858402	1		92.0074	0.5841	-0.233512	228	0.0972703		TGCAGTACAAATGCAACAGCAACTTGTGTCACGGAATGGATTAC	5858402	6.15192e-17		0	999		0	999		0	999		0	0	999	LFLV01002393.1scaffold_67.1	152909	4.84985e-15
5859552|F|0--51:T>A	1		92.0074	0.6269	-0.202802	228	0.0766909		TGCAGACATAACAGTATGGACCACAGTGCTCTTTGTAGCAACGTCTGTGAATTTTTCTCTTTGATTTTG	5859552	1.52834e-30	LFQT01002854.1_Scaffold00018	414325	1.83879e-25		0	999		0	999		0	0	999	LFLV01002393.1scaffold_67.1	138119	7.921e-26
5851188|F|0--33:A>G	1		92.0074	0.633481	-0.198266	228	0.0737947		TGCAGATATTCAATCGATCAACAACACATCACTAACATTCATAATAAGCATCAACCTTCAACACAATTA	5851188	1.52834e-30	LFQT01001312.1_Scaffold00030	672400	8.49476e-29		0	999		0	999		0	0	999	LFLV01001653.1scaffold_821.1	31121	3.6593e-29
5863886|F|0--35:A>C	1		92.0074	0.650586	-0.186695	228	0.0665838		TGCAGCTATAATACCAAGGAATGGTTATCTCATCAATGCTTAC	5863886	2.12043e-16	LFQT01001312.1_Scaffold00030	275207	1.74327e-12		0	999		0	999		0	0	999	CM004491.1_chromosome_B1	4156112	7.72906e-13
5847801	1		92.0074	0.664962	-0.177203	228	0.0608662		TGCAGAAATGACACGATATGATCACAGATCTTAC	5847801	1.41938e-11	CM007197.1_chromosome_B3	78430065	9.24025e-08		0	999		0	999		0	0	999	LFLV01000976.1scaffold_873.1	26090	9.20176e-10
5865254|F|0--5:T>C	1		92.0074	0.666309	-0.176324	228	0.0603462		TGCAGTATGGAGCGGGCGCTCCTTGCCAAAATCTGAGATATATGGAAAGTTTCTTTAC	5865254	1.60704e-24	LFQT01004661.1_Scaffold00007	833010	3.00641e-17		0	999		0	999	chrC07	27367844	1	5.79653e-14	CM004491.1_chromosome_B1	15650889	1.31393e-12
5237999|F|0--14:C>G	1		92.0074	0.693228	-0.159124	228	0.0504976		TGCAGACTGGTCAGCGCTGCCTTCTGCTGTTGTTAC	5237999	1.24354e-12	CM007192.1_chromosome_A8	3920454	1.84238e-10		0	999		0	999	chrA08	3110887	1	2.12279e-09		0	999
5857923|F|0--5:T>C	1		92.0074	0.708462	-0.149683	228	0.0453703		TGCAGTTGGCGACTGTATCCTACTTACTATACCCAACTTTAC	5857923	7.29484e-16	LFQT01003465.1_Scaffold00248	46185	5.93992e-12		0	999		0	999		0	0	999	CM004494.1_chromosome_B4	2877155	2.64087e-12
5834570	1		92.0074	0.716448	-0.144815	228	0.0428071		TGCAGTGGTGTTTGCCCTGAAGATCTGGCGATCCTACTTGTATGGTGCCAAATCCAAATATTAC	5834570	8.59634e-28	LFQT01007257.1_Scaffold00470	28137	7.58291e-24		0	999		0	999		0	0	999	LFLV01000853.1scaffold_989.1	17681	3.27581e-24
5854402|F|0--54:C>T	1		92.0074	0.72439	-0.140028	228	0.0403416		TGCAGTAAAGAACCATTGGAAGAAACCCCACAAGAAGCTCAAGGAGAAGAATTTCCCCAACACTCTCAC	5854402	1.52834e-30	LFQT01004271.1_Scaffold00073	151956	8.49476e-29	C8	3014143	4.47121e-24	NC_027755.1_chromosome_C8	3014143	4.47425e-24	chrA08	2703205	1	7.62012e-24	CM004491.1_chromosome_B1	3582648	3.6593e-29
5850862|F|0--20:C>T	1		92.0074	0.740947	-0.130213	228	0.0354638		TGCAGAGGGTCCAACACAAACTAGACAATTGGTATACAAGAGTGTTATCCCCCGCAGGAAAAGAGGTAC	5850862	1.52834e-30	LFQT01001312.1_Scaffold00030	96251	8.49476e-29		0	999		0	999		0	0	999	CM004491.1_chromosome_B1	4304320	3.6593e-29
5859035|F|0--18:A>G	1		92.0074	0.740947	-0.130213	228	0.0354638		TGCAGAAAAGCCTTGAGCAAGTGGAGGAGAGAACATAATTTTAC	5859035	6.15192e-17		0	999		0	999		0	999		0	0	999		0	999
14793150|F|0--15:G>A	1		92.0074	0.765621	-0.115986	228	0.028834		TGCAGGACATTCGCCGAAAACCTGGTCGGAACAGCCCTCGAATGGTTCTCCGGGCTTGAGCCAAATTCG	14793150	1.52834e-30	LFQT01004871.1_Scaffold00301	36561	3.95223e-27		0	999		0	999		0	0	999	LFLV01001368.1scaffold_904.1	71417	1.70251e-27
5847803	1		92.0074	0.794113	-0.100118	228	0.022097		TGCAGAACAGCATCATCCCATTGACCAGATGATTGATAATTAC	5847803	2.12043e-16	LFQT01001312.1_Scaffold00030	644710	8.11065e-11		0	999		0	999		0	0	999	LFLV01001653.1scaffold_821.1	61273	3.59598e-11
5851379	1		92.0074	0.818758	-0.0868446	228	0.0170348		TGCAGATGCAATTTCCCATTACAAATCTGGCCAATTCTCTAAATGATATGCCACGGCGATCACATAGCT	5851379	1.52834e-30	LFQT01008023.1_Scaffold00461	6112	8.49476e-29		0	999		0	999		0	0	999	CM004498.1_chromosome_B8	1248955	3.6593e-29
5852513	1		92.0074	0.840233	-0.0756	228	0.0131848		TGCAGCCTTGAGACATCTTCTAGCCAAGAAGGATGCCAAGCCAAGACTACTAAGGTGGATCCTTTTGCT	5852513	1.52834e-30	LFQT01007527.1_Scaffold00641	52615	8.55507e-24		0	999		0	999		0	0	999	LFLV01001326.1scaffold_982.1	44869	3.68528e-24
5852561|F|0--35:G>A	1		92.0074	0.851704	-0.0697115	228	0.011338		TGCAGCGAGTTGTAGCTCTTTCTACAACTGAAGCCGAATATATGGCTTTGACTGAAGCGGTTAC	5852561	8.59634e-28	LFQT01000582.1_Scaffold01088	15677	7.58291e-24	C2	41700899	8.66415e-16	NC_027749.1_chromosome_C2	41700899	8.67006e-16		0	0	999	CM004491.1_chromosome_B1	22995016	3.27581e-24
5861820|F|0--44:C>A	1		92.0074	0.871965	-0.0595012	228	0.00842623		TGCAGATCGAAGACAAACCCATAAAGTCACTTCCTTCGCGAGTACCCTGGCAGCTATCCTCTTCTCATC	5861820	1.52834e-30		0	999	C1	33875119	2.09502e-17	NC_027748.1_chromosome_C1	33875119	2.09645e-17	chrCnn_random	10022569	1	3.57047e-17		0	999
5866087|F|0--59:A>T	1		92.0074	0.890096	-0.0505632	228	0.00619442		TGCAGTCACCGGAACAGAGCTCTGGTAAGTTTGCCGGAGAGTTTCGGAGGATCCTCAATAACTGCAAGC	5866087	1.52834e-30	LFQT01004871.1_Scaffold00301	28658	3.95223e-27		0	999		0	999		0	0	999	LFLV01000940.1scaffold_903.1	26653	1.70251e-27
5829991	1		92.0074	0.899522	-0.045988	228	0.00517194		TGCAGAAAGGGAACAAAGATGAGGAGCTTTCGTTCTGTTGTATGAATGAGACAAGTAGTGAAACTTCAT	5829991	1.52834e-30	LFQT01004271.1_Scaffold00073	154263	8.49476e-29		0	999		0	999		0	0	999	CM004491.1_chromosome_B1	3580344	3.6593e-29
5862741	1		92.0074	0.956503	-0.0193138	228	0.000965055		TGCAGCAGAACAGCTGCACATGTGGGCATGTTCGTGATCAGAGTGTTGGAAATTGATTTAC	5862741	3.72679e-26		0	999		0	999		0	999		0	0	999		0	999
5839359	1		92.0074	0.956544	-0.0192952	228	0.000963236		TGCAGCTGCCATACTCCTGTATTCGGCTTCAGCCGTCGGTTTGGAGACTGTATCCTGCTTCTTGGAACG	5839359	1.52834e-30	LFQT01004554.1_Scaffold00423	48819	2.37863e-24		0	999		0	999		0	0	999	LFLV01001999.1scaffold_282.1	133714	1.70251e-27
5865550|F|0--27:C>T	1		92.3441	0.508382	-0.29381	228	0.142027		TGCAGCCCGTTGTGATGCGGAAAAGCACTTCAAATGTTAC	5865550	8.57861e-15		0	999		0	999		0	999		0	0	999		0	999
5865552|F|0--31:A>G	1		92.3441	0.662981	-0.178499	228	0.0616359		TGCAGCCCGTTGTGATGCGGAAAAGCATTTCAATTGTTAC	5865552	8.57861e-15		0	999		0	999		0	999		0	0	999		0	999
5865552	1		92.3441	0.921415	-0.0355448	228	0.00315714		TGCAGCCCGTTGTGATGCGGAAAAGCATTTCAATTGTTAC	5865552	8.57861e-15		0	999		0	999		0	999		0	0	999		0	999
5841369	1		92.3441	0.412475	-0.384602	228	0.218206		TGCAGAAAAAACATAGAGATTAGAGAGAGTCACCAACTCCAACTTAC	5841369	1.48755e-18	LFQT01002067.1_Scaffold00395	84500	2.71057e-16		0	999		0	999		0	0	999	LFLV01000774.1scaffold_349.1	100514	1.19132e-16
5856079	1		92.5313	0.657988	-0.181782	228	0.0636016		TGCAGTCCCCTCTTGAATATCTTCCTTGCTGTATCTTCTCGAAGGACCTCTCATAATAGTATATTACAG	5856079	1.52834e-30	LFQT01004128.1_Scaffold00113	39479	3.95223e-27	C2	27452653	2.08025e-22	NC_027749.1_chromosome_C2	27452653	2.08167e-22	chrCnn_random	11088284	2	1.64947e-20	CM004491.1_chromosome_B1	5636755	1.70251e-27
5862168|F|0--25:T>G	1		92.6808	0.711791	-0.147648	228	0.0442917		TGCAGATTTCTTTTACAAATCTAGTTCATTTAC	5862168	4.76465e-11		0	999		0	999		0	999		0	0	999		0	999
5865550	1		92.6808	0.910556	-0.0406933	228	0.00409386		TGCAGCCCGTTGTGATGCGGAAAAGCACTTCAAATGTTAC	5865550	8.57861e-15		0	999		0	999		0	999		0	0	999		0	999
5866237	1		92.6808	0.440617	-0.355939	228	0.193164		TGCAGCAGTCTCAGCTTCTGGATCAGGGATTGTGTCCCCCTGATCATTAC	5866237	3.55254e-20	LFQT01006521.1_Scaffold00106	25474	1.37075e-14		0	999		0	999		0	0	999	LFLV01000514.1scaffold_195.1	40553	6.00454e-15
14769415	1		92.6808	0.509156	-0.293149	228	0.141508		TGCAGATCTTGCTCTTACAATGTTCTTTGTGTTGTTGCTGGATGCTAGGTTGTCTATTATTAC	14769415	3.02152e-27	LFQT01000364.1_Scaffold01418	8849	1.23635e-21		0	999		0	999		0	0	999	CM004494.1_chromosome_B4	2697937	5.34454e-22
5859621	1		92.6808	0.699318	-0.155326	228	0.0484101		TGCAGACTGCTTTTAGCCGAGTAACAGACGAACAAGAGGAAAGTGGCTAAACAGCTCGGGACAAGATTT	5859621	1.52834e-30	LFQT01000246.1_Scaffold00643	46151	1.11453e-17		0	999		0	999		0	0	999	LFLV01001848.1scaffold_173.1	12763	7.921e-26
5857049|F|0--6:T>G	1		92.6808	0.90108	-0.0452365	228	0.00501197		TGCAGATATCTTCGGGATCGAGAAGTCTATGAGAGAATGGCTTAC	5857049	1.78173e-17	LFQT01001804.1_Scaffold00026	710335	3.20144e-15		0	999		0	999		0	0	999	CM004491.1_chromosome_B1	8983796	6.57242e-14
5845738	1		92.6808	0.973942	-0.0114668	228	0.000346119		TGCAGCGGCTCCTCTTCTCTCACCACTATCTTCACTTAC	5845738	3.1445e-14	LFQT01007006.1_Scaffold00006	857598	4.94993e-12		0	999		0	999		0	0	999	LFLV01001870.1scaffold_900.1	29669	2.22389e-12
5846030	1		93.0175	0.441011	-0.355551	228	0.192831		TGCAGTAATCTGATTTTGAAAATGCTTTAC	5846030	1.74175e-09	LFQT01007888.1_Scaffold00227	97187	2.32639e-07		0	999		0	999		0	0	999	CM004496.1_chromosome_B6	4024524	1.11985e-07
5857813	1		93.0175	0.678895	-0.168198	228	0.0556136		TGCAGCTAACATATCAATTGATGTACCAAGTGTTGGTATTAC	5857813	7.29484e-16		0	999	Scaffold04142	196	2.49463e-08	NW_013620666.1_UnpScaffold04142	196	2.49633e-08	chrC08	26114272	2	4.11901e-08		0	999
5836663	1		93.0175	0.71085	-0.148222	228	0.0445951		TGCAGTCTCCAGATTCATCTAGAAATGGAGATTTAGTGACCAAGTCTATTGAGGATGATATTATTACAG	5836663	1.52834e-30	LFQT01007535.1_Scaffold02163	6574	8.55507e-24		0	999		0	999		0	0	999	CM004491.1_chromosome_B1	11844486	1.71459e-22
5866070	1		93.0175	0.804837	-0.0942921	228	0.0198085		TGCAGTAAGCATCATGGCTATAGACACTGCTGAATTATTAGGATTAC	5866070	1.48755e-18	LFQT01004661.1_Scaffold00007	1187175	2.71057e-16		0	999		0	999		0	0	999	LFLV01000654.1scaffold_327.1	160159	1.19132e-16
14782228	1		93.3542	0.704686	-0.152004	228	0.0466117		TGCAGGTAATTCCCGGAAACCGCCATGCAATTAC	14782228	1.41938e-11		0	999		0	999		0	999		0	0	999		0	999
5865582	1		94.0276	0.514873	-0.2883	228	0.137722		TGCAGCACACTGTCCTTTCCTTCCCATGAAGCAGTCTCCAGCCAATCTTTATTAC	5865582	6.88654e-23	LFQT01002803.1_Scaffold00355	89953	2.7331e-17	C8	6608349	5.1908e-17	NC_027755.1_chromosome_C8	6608349	5.19434e-17	chrCnn_random	9717972	12	8.7557e-17	LFLV01000753.1scaffold_75.1	266594	1.18955e-17
5854220	1		94.0276	0.675084	-0.170642	228	0.0570226		TGCAGGTGCGACTTGTTGGGGTCAAAATCGGTCAATGACGAAATCGTCACCCGAAAGTCCTCGAAAGAA	5854220	1.52834e-30	LFQT01006040.1_Scaffold00059	258471	3.07695e-23		0	999		0	999		0	0	999	LFLV01001951.1scaffold_157.1	553785	1.32546e-23
5866099	1		94.2149	0.628213	-0.201893	228	0.0761075		TGCAGTCTCTTGAACAGAGCTCAGGTAAGTTTTCCGGAGAGTTTCGGAGGATCCTCAATAACTGAAAGC	5866099	1.52834e-30	LFQT01004871.1_Scaffold00301	28658	1.85185e-20		0	999		0	999		0	0	999	CM004492.1_chromosome_B2	32990811	1.70251e-27
5857896	1		94.2149	0.673371	-0.171745	228	0.0576625		TGCAGCTGAACTTACGTGGCTGGTTTCTCTTATGTTTGAGCTTGGATTAC	5857896	3.55254e-20		0	999		0	999		0	999		0	0	999		0	999
5862971|F|0--37:A>G	1		94.3666	0.62388	-0.204899	228	0.0780429		TGCAGATAACCATTGCATCATGGTATTTCTCAACTAAATACCGGGGCCCACCGGTAAAACTCGGCAGCA	5862971	1.52834e-30	LFQT01002854.1_Scaffold00018	156326	8.55507e-24	C2	10269439	4.53492e-14	NC_027749.1_chromosome_C2	10269439	4.53801e-14	chrC02	8032317	2	2.14887e-14	LFLV01002393.1scaffold_67.1	355954	7.921e-26
5846517	1		94.9647	0.211701	-0.674278	228	0.507731		TGCAGCATACATCACGGTTCAATCCATATTCTCGAGGGCGAGAAAGGCAACAACAATTTAC	5846517	3.72679e-26	LFQT01004271.1_Scaffold00073	99594	2.53538e-18		0	999		0	999		0	0	999	CM004491.1_chromosome_B1	3631472	5.10646e-17
5836963	1		94.9647	0.934351	-0.0294899	228	0.00220108		TGCAGAAAGGGAACAAAGATGAGGAGCTTTCGTTCTGTTGTATGAATGAGACAAGTAGTGAACTTCATT	5836963	1.52834e-30	LFQT01004271.1_Scaffold00073	154263	3.95223e-27	C9	5143504	5.78387e-23	NC_027756.1_chromosome_C9	5143504	5.78781e-23		0	0	999	CM004491.1_chromosome_B1	3580344	1.70251e-27
5862971	1		95.0515	0.643184	-0.191665	228	0.0696489		TGCAGATAACCATTGCATCATGGTATTTCTCAACTAAATACCGGGGCCCACCGGTAAAACTCGGCAGCA	5862971	1.52834e-30	LFQT01002854.1_Scaffold00018	156326	8.55507e-24	C2	10269439	4.53492e-14	NC_027749.1_chromosome_C2	10269439	4.53801e-14	chrC02	8032317	2	2.14887e-14	LFLV01002393.1scaffold_67.1	355954	7.921e-26
5857430	1		95.3933	0.528204	-0.277198	228	0.129173		TGCAGCAAACTTCTCACATGATTTAC		999		0	999		0	999		0	999		0	0	999		0	999
14791402	1		95.3933	0.609408	-0.215092	228	0.0847284		TGCAGTCGCCAGATTCATCTAGAAATGGAGATTTAGTGACCAAGTCTATTGAGGATGATTATTAC	14791402	2.44442e-28	LFQT01007535.1_Scaffold02163	6578	2.16239e-24		0	999		0	999		0	0	999	CM004491.1_chromosome_B1	11844490	4.34346e-23
5846433	1		95.3933	0.626808	-0.202866	228	0.0767319		TGCAGATAATGAGCTTGAAGAAAGACCATGAAGTGAATCTGCATGATGTTGCCTTAC	5846433	5.62783e-24	LFQT01009689.1_Scaffold00082	93171	1.74219e-19	C8	3647855	4.30194e-13	NC_027755.1_chromosome_C8	3647855	4.30488e-13	chrA08	2926712	2	1.56281e-14	LFLV01000774.1scaffold_349.1	155186	7.56742e-20
5837326	1		95.3933	0.636697	-0.196067	228	0.0724042		TGCAGCGCATCGATCCCAACCCCTCCATTATGAGTTCTCACTAACTCCATCAATTGGTGACAGCTTGTA	5837326	1.52834e-30	CM007196.1_chromosome_B2	18384589	1.85185e-20	C2	4024937	9.81637e-11	NC_027749.1_chromosome_C2	4024937	9.82307e-11	chrAnn_random	26770217	8	4.61869e-16	CM004492.1_chromosome_B2	14327760	7.97723e-21
5859036	1	B01	95.3933	0.66527	-0.177002	228	0.0607472		TGCAGAAAAGCCTTGAGCGAGTGGAGGAGAGAACATAATATTAC	5859036	6.15192e-17	CM007195.1_chromosome_B1	30528905	1.41856e-13		0	999		0	999		0	0	999		0	999
5865363	1		95.3933	0.677115	-0.169337	228	0.0562689		TGCAGCTCCACTTGCTTGTCAAAATCCTACTGCTCTGCTTCTGAAATGGACTCAGCTGAAACTTTACAG	5865363	1.52834e-30	LFQT01004661.1_Scaffold00007	830741	8.55507e-24	Scaffold14396	135	7.48191e-22	NW_013630914.1_UnpScaffold14396	135	7.48701e-22	chrCnn_random	33304104	14	1.27512e-21	LFLV01001116.1scaffold_744.1	68982	3.68528e-24
14781394	1		95.3933	0.775288	-0.110537	228	0.0264399		TGCAGATGCAAACACCGCGATACATGACCAGATTAC	14781394	1.24354e-12	LFQT01006040.1_Scaffold00059	223649	1.84238e-10		0	999		0	999		0	0	999	LFLV01001334.1scaffold_1005.1	8597	8.40674e-11
14774703	1		96.412	0.841069	-0.0751686	228	0.0130454		TGCAGGTCCGTTTTCACTCGCCTCTTTAC	14774703	5.69496e-09		0	999		0	999		0	999		0	0	999		0	999
14769264	1		96.412	0.948931	-0.0227653	228	0.00133078		TGCAGAGGATAGATTCAAACTAGAGATTCTTTGCTTCATATAACCAGTGCACTCTCTAGGACATTTGGT	14769264	1.52834e-30	LFQT01005606.1_Scaffold00245	50967	3.95223e-27		0	999		0	999		0	0	999	LFLV01000055.1scaffold_603.1	13355	2.91001e-10
5858329|F|0--30:A>C	1		96.7499	0.894584	-0.0483787	228	0.00569587		TGCAGGTTCTTCAGCTCCCGCAGCACCGTTATCCTCTTCAGGCTCTTCCTGGTCGTTAC	5858329	4.58575e-25	LFQT01003068.1_Scaffold07158	1011	8.55153e-23		0	999		0	999		0	0	999	CM004494.1_chromosome_B4	28623276	3.70783e-23
5861459|F|0--42:C>A	1		97.4233	0.408564	-0.38874	228	0.22189		TGCAGTGAACTGTGAAGAGGTTATGAGAGGTTTATACGACACCATTGGAAAGTTGGTTCCTGAAGTTGC	5861459	7.11069e-29	LFQT01001758.1_Scaffold00347	66736	3.95223e-27		0	999		0	999	chrC03	56130566	1	3.5453e-22	CM004496.1_chromosome_B6	13694588	1.70251e-27
5858402|F|0--11:T>C	1		97.4233	0.511558	-0.291105	228	0.139908		TGCAGTACAAATGCAACAGCAACTTGTGTCACGGAATGGATTAC	5858402	6.15192e-17		0	999		0	999		0	999		0	0	999	LFLV01002393.1scaffold_67.1	152909	4.84985e-15
5860478|F|0--17:T>C	1		97.4233	0.511558	-0.291105	228	0.139908		TGCAGCGTTCCTTGGAATCTAGTAGTTGCTATGACAAATCGGCTTTCGTTTTGCCTGTTTGCGATTTTA	5860478	1.52834e-30	LFQT01006315.1_Scaffold00002	186476	1.11453e-17		0	999		0	999		0	0	999		0	999
5862146|F|0--26:A>G	1		97.4233	0.784425	-0.105448	228	0.0242796		TGCAGATGGCTTCTACTCCTGATCCAATTAC	5862146	5.28297e-10		0	999		0	999		0	999		0	0	999		0	999
5866096	1		97.922	0.428829	-0.367716	228	0.203351		TGCAGTCTCCGGAACAGAGATCTAGTGAGTTTGCCGGAGAGTTTCGGAGGATCCTCAATAACTGCAAGA	5866096	7.11069e-29	LFQT01007569.1_Scaffold02572	7802	6.61348e-25		0	999		0	999		0	0	999	LFLV01001741.1scaffold_753.1	104202	2.8489e-25
5836577	1		97.922	0.551673	-0.258318	228	0.115033		TGCAGTATCAGATAGAGTTCGATACTCAGCTTTTGTGGAAGAACATGCAACAGAGTCCTGACGTTTAGC	5836577	1.52834e-30	CM007198.1_chromosome_B4	25201109	8.49476e-29		0	999		0	999		0	0	999		0	999
5858401	1		97.922	0.559498	-0.252201	228	0.110564		TGCAGTACAAACGCAACAGCAACTTGTGTCAAGTAATGGATTAC	5858401	6.15192e-17	LFQT01002854.1_Scaffold00018	397939	1.09661e-14		0	999		0	999		0	0	999		0	999
5866242	1		97.922	0.657675	-0.181989	228	0.063726		TGCAGCAGCTTCAGCTTCTAGATCAGGGATTGCAGCCCCTTGATCATTAC	5866242	3.55254e-20	CM007196.1_chromosome_B2	20299097	6.33253e-18		0	999		0	999		0	0	999	CM004492.1_chromosome_B2	4458118	1.29059e-16
14757436	1		97.922	0.838802	-0.0763407	228	0.0134255		TGCAGCAATATGGAGAAGAGCAGGTGAGTACAAGTGTGACCAAGAAGCTTCACCAAAAAGGCAATTCAT	14757436	1.52834e-30	LFQT01002854.1_Scaffold00018	320954	8.49476e-29		0	999		0	999		0	0	999	CM004495.1_chromosome_B5	26024167	3.6593e-29
5860406|F|0--28:C>A	1		98.099	0.298807	-0.52461	228	0.351027		TGCAGCGACGCAAAATTTTAGGTATCAGCAAACATCTTAGCAGTGAGGGATACGACCTTTCGTTTTTGC	5860406	1.52834e-30	LFQT01006021.1_Scaffold00279	23153	1.83879e-25		0	999		0	999		0	0	999	CM004491.1_chromosome_B1	9010369	2.20233e-26
5845540	1		98.2587	0.224503	-0.648778	228	0.480166		TGCAGATCTCAATTGTAGCTAAATTAGAAAAAAGGCCTAACGCCATATCTCGCCATTTAC	5845540	1.3077e-25	LFQT01004661.1_Scaffold00007	114654	2.44758e-23		0	999		0	999		0	0	999	LFLV01002366.1scaffold_223.1	128629	1.06037e-23
5853063	1		98.2587	0.825419	-0.0833255	228	0.0157854		TGCAGCTGCGATCTTCCCGGTTGTTCAGAAACAGCGTCAGCTTTTAGTGACACTGCTTCTGTGCAATGC	5853063	1.52834e-30	LFQT01004726.1_Scaffold03907	3153	8.49476e-29	C1	31246590	9.67846e-21	NC_027748.1_chromosome_C1	31246590	9.68506e-21	chrA04	4706559	2	7.62012e-24	LFLV01002393.1scaffold_67.1	293411	3.6593e-29
5845716	1	B01	98.2587	0.909328	-0.0412796	228	0.00420757		TGCAGCCTCTTGATTCCACCGGAAACCATCTTTTTAC	5845716	3.6609e-13	CM007195.1_chromosome_B1	30181734	5.54939e-11		0	999		0	999		0	0	999	LFLV01002393.1scaffold_67.1	941285	2.51719e-11
5846017	1		98.2587	0.924666	-0.0340151	228	0.00290053		TGCAGTAACAAAAACCTTCAATTTTCTCCCAAGTACGTTAC	5846017	2.50443e-15	LFQT01003675.1_Scaffold00210	62063	4.33674e-13		0	999		0	999		0	0	999	CM004496.1_chromosome_B6	27165927	1.93407e-13
5844998	1		98.2598	0.833654	-0.079014	228	0.0143096		TGCAGTTCCCTCTTGAATATCTTCCTTACTATATCTTCTAGAAGGATCTCTCTTAC	5844998	1.96942e-23	LFQT01002004.1_Scaffold00034	78676	3.62758e-21		0	999		0	999		0	0	999	LFLV01002393.1scaffold_67.1	970184	1.57722e-21
5839284	1		98.438	0.437688	-0.358835	228	0.195656		TGCAGAAAAATAGCAAGTGAGTCAAAACCTCTAAAACTTATTGTTCGTTTTATAGTGATCTGTAGCTCA	5839284	1.52834e-30		0	999		0	999		0	999		0	0	999		0	999
5844226	1		98.7781	0.697187	-0.156651	228	0.0491346		TGCAGGTGAGGGTGAAGTTCAAAACTTAC	5844226	5.69496e-09	LFQT01009533.1_Scaffold00144	146400	7.17188e-07	C8	3936641	4.27633e-07	NC_027755.1_chromosome_C8	3936641	4.27924e-07	chrC08_random	465964	2	6.38796e-07	LFLV01000692.1scaffold_577.1	63855	3.52423e-07
5847854	1		98.7781	0.833943	-0.0788635	228	0.0142591		TGCAGGAAGCAACAGAGATTCTGGTTAC	5847854	1.84344e-08		0	999		0	999		0	999		0	0	999		0	999
5837049	1		98.9378	0.775929	-0.110178	228	0.0262851		TGCAGACGCCGTGAGTGAATTTGTGGTGCGGTAGTGTTGTCTATGTTGTCTGTTGATACGTTAC	5837049	8.59634e-28	LFQT01005512.1_Scaffold00125	29965	1.26889e-21		0	999		0	999		0	0	999	LFLV01001999.1scaffold_282.1	179856	2.55033e-20
5865583	1		99.4913	0.176956	-0.752134	228	0.593769		TGCAGCACACTGTCCTCTCCTTCCCATGAAGCAGTCTCAAGCCAATCATAATTAC	5865583	6.88654e-23	LFQT01003675.1_Scaffold00210	116375	1.26262e-20		0	999		0	999		0	0	999	CM004491.1_chromosome_B1	3350972	5.49543e-21
14759240	1		99.4913	0.238993	-0.621616	228	0.451167		TGCAGGGTGAATCGATCGTGGGGTTTATAGCTGTGAACACTCTGCGGAAGGGCTTCATATAAACTCTCA	14759240	1.52834e-30	CM007197.1_chromosome_B3	17263991	8.49476e-29		0	999		0	999		0	0	999	LFLV01001209.1scaffold_586.1	18213	3.6593e-29
5837199	1		99.4913	0.259141	-0.586463	228	0.414232		TGCAGCAAAACGGCGTAGTAGAGAGAAGAAACCGCACTCTTATGGAGATGACTCGTAGCATGTTACAGA	5837199	1.52834e-30	CM007197.1_chromosome_B3	7522431	1.10667e-22	Scaffold05258	7	9.74717e-16	NW_013621780.1_UnpScaffold05258	7	9.75382e-16	chrC08	20226082	3	1.66118e-15	LFLV01001259.1scaffold_4246.1	1589	4.76721e-23
5836313	1		99.4913	0.278289	-0.555504	228	0.382298		TGCAGGCCAAAACCCTCATCACACGCCGTATACTACTTTGTCAATGGGGAACTTGGTCGCCGAGGAAAG	5836313	1.52834e-30	LFQT01007257.1_Scaffold00470	53788	8.49476e-29		0	999		0	999		0	0	999	LFLV01000853.1scaffold_989.1	43335	3.6593e-29
5835137	1		99.4913	0.307389	-0.512312	228	0.338756		TGCAGCAGGGATCGCGTTACTAAGAGCACGCCACATGAAGGATCTGATTTTTGGTTGCGTTTTAC	5835137	2.44442e-28	LFQT01006314.1_Scaffold00975	8201	4.64776e-26		0	999		0	999		0	0	999	LFLV01002091.1scaffold_1583.1	20146	2.00657e-26
5846518	1		99.4913	0.315197	-0.501417	228	0.327973		TGCAGCATATAATCTCTCAGCTCCGCCCTAGCCTCATTAC	5846518	8.57861e-15		0	999		0	999		0	999		0	0	999		0	999
5861109	1		99.4913	0.448693	-0.34805	228	0.186424		TGCAGGTAGTTTGGTTGCTAAGCATGATAACTCAGGTGTCACTTTGAAAGGACCCAAGGATCTTCCCCA	5861109	1.52834e-30	LFQT01004661.1_Scaffold00007	1127592	8.49476e-29		0	999		0	999	chrA08	6985916	1	2.13372e-19	LFLV01000654.1scaffold_327.1	110141	1.70251e-27
5845697	1		99.4913	0.450094	-0.346697	228	0.185274		TGCAGCCCTGAAGGCTTCTGGAAAAAAACTTTAC		999		0	999		0	999		0	999		0	0	999		0	999
5857669	1		99.4913	0.453658	-0.343272	228	0.182374		TGCAGCCAGATTTGAGCTGCAAAGTAATACAAAATAATGCACAAGAAATTGTTAC	5857669	3.204e-21	LFQT01001312.1_Scaffold00030	155602	5.87442e-19		0	999		0	999		0	0	999	CM004491.1_chromosome_B1	4258977	2.55677e-19
5833737	1		99.4913	0.460928	-0.336367	228	0.176567		TGCAGGTGCAAGATATGATGCTCGGCTTCCAGGGACTTCATGATGTCTTGCTTCATTGTTTTAGCATTC	5833737	1.52834e-30	LFQT01005495.1_Scaffold00515	37137	8.49476e-29		0	999		0	999		0	0	999	CM004496.1_chromosome_B6	8462020	3.6593e-29
5858221|F|0--5:T>G	1		99.4913	0.494067	-0.306215	228	0.151863		TGCAGTGGTGAGATCAGTAAACCAAGGGTTTCACTTCCACCGGTTTTAC	5858221	1.23513e-19	CM007199.1_chromosome_B5	20569183	2.18648e-17		0	999		0	999		0	0	999	LFLV01000403.1scaffold_287.1	68422	2.07655e-14
5865772	1		99.4913	0.494201	-0.306097	228	0.151769		TGCAGATAAATGTCAATGCTCGAGGATAACTACGAAGTTCGACGGAAAATGAAATATTTCCAAAAGAGA	5865772	1.52834e-30	LFQT01000434.1_Scaffold01404	18559	8.49476e-29		0	999		0	999		0	0	999	LFLV01001347.1scaffold_2194.1	3929	2.8489e-25
5829756	1		99.4913	0.507469	-0.29459	228	0.14264		TGCAGCAGCACCAGAGCAAGAGCAAACAACAATAGCTGATACTTCTCTCGTTGAGATCGTTTAC	5829756	8.59634e-28	LFQT01000389.1_Scaffold00370	64952	1.62984e-25		0	999		0	999		0	0	999	CM004494.1_chromosome_B4	13104493	7.04089e-26
5866145|F|0--16:C>T	1		99.4913	0.517847	-0.285799	228	0.135781		TGCAGCGCATCGATCCCAACCCCTCCATTATGAATTCTCACTAACTCAATAATTAGGTTGTTGGCGTCC	5866145	1.52834e-30	LFQT01004847.1_Scaffold00194	47053	1.83879e-25		0	999		0	999		0	0	999	LFLV01000537.1scaffold_272.1	325627	3.68528e-24
5836922	1		99.4913	0.519878	-0.284099	228	0.134467		TGCAGCTCCACCATCAAACACGTCAAATAAAAAGTGCACGCACGAGCAGACATCTCTGCTGATCATTTT	5836922	1.52834e-30		0	999		0	999		0	999		0	0	999		0	999
5836735	1		99.4913	0.537916	-0.269285	228	0.123184		TGCAGTGGATTTGATTTCATCAGACAGACACAACGTCTAGAAAGGAGGATAAAAGACAACACGTACGAG	5836735	1.52834e-30	LFQT01002230.1_Scaffold06713	1213	8.49476e-29		0	999		0	999		0	0	999		0	999
5858892	1		99.4913	0.539227	-0.268228	228	0.122391		TGCAGCAAGAAGGTCATCCGATCGCATTTTTCAGTAGAACATTAGCAGCTCGTCATGTTAC	5858892	3.72679e-26		0	999		0	999		0	999		0	0	999	LFLV01002177.1scaffold_1006.1	15747	1.40978e-22
5866145	1		99.4913	0.54962	-0.259938	228	0.116225		TGCAGCGCATCGATCCCAACCCCTCCATTATGAATTCTCACTAACTCAATAATTAGGTTGTTGGCGTCC	5866145	1.52834e-30	LFQT01004847.1_Scaffold00194	47053	1.83879e-25		0	999		0	999		0	0	999	LFLV01000537.1scaffold_272.1	325627	3.68528e-24
5835639	1		99.4913	0.572098	-0.24253	228	0.103615		TGCAGATAGCCCCGCCACACGATAACTTCCACTTCTTACACCCACACCACGACTTATCGCTGCTTCTTA	5835639	1.52834e-30	LFQT01004661.1_Scaffold00007	1666684	8.49476e-29		0	999		0	999		0	0	999	LFLV01002129.1scaffold_779.1	16249	1.70251e-27
5845851	1		99.4913	0.589319	-0.22965	228	0.0945929		TGCAGGAATCTGACCCATTGTATGGAGTCTTATCTGAAAGTCAGGTGGAAATTAC	5845851	6.88654e-23	LFQT01004661.1_Scaffold00007	1394807	1.26262e-20		0	999		0	999		0	0	999		0	999
19819019	1		99.4913	0.596503	-0.224387	228	0.0909852		TGCAGGTGATGTACTGTCGATCGATATCGACATGCTCTAATCGGTCGATATTCAAGGCAATCTTCTACT	19819019	1.52834e-30	LFQT01000129.1_Scaffold00132	153281	3.95223e-27	C1	37552923	9.61023e-26	NC_027748.1_chromosome_C1	37552923	9.61678e-26	chrA07	3993660	14	3.52031e-27	LFLV01000299.1scaffold_380.1	201408	1.70251e-27
5851719	1		99.4913	0.624874	-0.204208	228	0.0775964		TGCAGCAACAGTGGAAATAGTTGCTGTATAATTCAGAAGCTCGGATCTAGCTGAAAACCCTAATGCATC	5851719	1.52834e-30	LFQT01009533.1_Scaffold00144	49565	1.83879e-25		0	999		0	999		0	0	999	LFLV01000692.1scaffold_577.1	130515	7.921e-26
5864478|F|0--41:C>A	1		99.4913	0.641385	-0.192881	228	0.0704064		TGCAGTTTTCTGGGTTTAGCAGGGTATTACTGAAAGTTCGTCAAAGGTTTCGCCAGTATTGCCAAACCA	5864478	1.52834e-30	LFQT01008949.1_Scaffold00524	20034	8.49476e-29		0	999		0	999		0	0	999	LFLV01000911.1scaffold_1139.1	51145	3.6593e-29
5836499	1		99.4913	0.660103	-0.180388	228	0.0627644		TGCAGTAACAGAGGTTTCTTCTTTGCGACAGGATTCCCTGCTCTTCTCGCTGCCGCTTCCAATTGTCTT	5836499	1.52834e-30	LFQT01004661.1_Scaffold00007	1394741	8.49476e-29		0	999		0	999		0	0	999		0	999
5836997	1		99.4913	0.677853	-0.168864	228	0.0559966		TGCAGAAGACAGTCGGAACAACCCGCAAGGACTGGTCTCTCAAATTAGATGATGCGTTGTGGGCTTTTA	5836997	1.52834e-30	LFQT01003465.1_Scaffold00248	117341	1.83879e-25	C8	10937687	4.50295e-19	NC_027755.1_chromosome_C8	10937687	4.50602e-19	chrC08_random	1161186	3	7.67422e-19	CM004494.1_chromosome_B4	2842687	7.921e-26
5855755	1		99.4913	0.693615	-0.158882	228	0.0503634		TGCAGGTTTCACATTACCCGATAGGCCGATACAAGGTAACTATACACCTAAGAAAACAACAAACAAGAT	5855755	1.52834e-30	CM007198.1_chromosome_B4	25136815	8.49476e-29		0	999		0	999		0	0	999	LFLV01002393.1scaffold_67.1	661470	1.70251e-27
5865409	1		99.4913	0.706845	-0.150676	228	0.0458998		TGCAGTGAAACGTTCGGGTCCCAGCTTTCGTGTTATTTGTTTAC	5865409	2.86221e-15	CM007197.1_chromosome_B3	58725620	1.09661e-14		0	999		0	999		0	0	999	CM004491.1_chromosome_B1	2012133	4.84985e-15
5863590	1		99.4913	0.707899	-0.150028	228	0.0455541		TGCAGTGTTCTTTGCCTTATCCTTCAAGTTACTGGCCGCCTCGGAGATCGTTTGTGCTCCTTCGTCCGC	5863590	1.52834e-30	LFQT01006488.1_Scaffold00017	62753	8.49476e-29		0	999		0	999	chrC08	6655571	2	1.64947e-20	LFLV01000201.1scaffold_720.1	63330	3.6593e-29
5862910	1		99.4913	0.71584	-0.145184	228	0.0429992		TGCAGAGATAAAACAGAAACAGAAGCCAGACACACCTGATGCTAGGACTTTTCAAGGGTCCTTAC	5862910	2.44442e-28	LFQT01006488.1_Scaffold00017	386007	4.64776e-26		0	999		0	999		0	0	999	LFLV01001150.1scaffold_616.1	32359	2.00657e-26
5842380	1		99.4913	0.721104	-0.142002	228	0.0413516		TGCAGATAAATCATGCTACACTCATAAGTCTTGAAACCGAAATTTAC	5842380	1.48755e-18		0	999		0	999		0	999		0	0	999		0	999
19819000	1		99.4913	0.731819	-0.135596	228	0.0381095		TGCAGTCTGAAACTATTCCTGAAACCTTGTCTTATGACCTGGAAAAGCACTGTAAGGGGTTTAC	19819000	8.59634e-28		0	999		0	999		0	999		0	0	999	CM004493.1_chromosome_B3	11380046	3.27581e-24
5830494	1		99.4913	0.735525	-0.133403	228	0.0370224		TGCAGACACTCGCACTGTTCTGATGTCTCTTTCGAGTGAAACCTTCGGAAAGAATTCGTAAGGAGCGAT	5830494	1.52834e-30	LFQT01005072.1_Scaffold00203	76999	3.95223e-27		0	999		0	999		0	0	999	CM004498.1_chromosome_B8	210732	3.6593e-29
5836692	1		99.4913	0.743934	-0.128466	228	0.0346209		TGCAGTGACATTGACCAATGTAGGAACCAATAGTGATGGCAGTGGTCAAAATTATGCATTAC	5836692	1.06146e-26	LFQT01006488.1_Scaffold00017	840325	2.00021e-24		0	999		0	999		0	0	999	CM004494.1_chromosome_B4	15526907	8.65256e-25
5842197	1		99.4913	0.760057	-0.119154	228	0.0302634		TGCAGAGCAAGTTTACAGCAACAGTTCGTACATTAC	5842197	1.24354e-12	LFQT01005072.1_Scaffold00203	122277	1.84238e-10		0	999		0	999		0	0	999	CM004498.1_chromosome_B8	268439	8.40674e-11
5837104	1		99.4913	0.761781	-0.11817	228	0.0298166		TGCAGAGGGTTTGTCATATCATTTCTTACCAAACCAGTGGTGGCCAAAGGCGTCTATAGATGAAATAGT	5837104	1.52834e-30		0	999		0	999		0	999		0	0	999		0	999
19819004|F|0--41:G>T	1		99.4913	0.769394	-0.113851	228	0.0278862		TGCAGCGCCCGAAACACATCCTTGAACTCCTGAACCAACGGGATCCCGTCCGGGCTACCACCCCCTACA	19819004	1.52834e-30	LFQT01006491.1_Scaffold01768	9583	3.95223e-27		0	999		0	999		0	0	999	LFLV01000479.1scaffold_1722.1	7327	1.70251e-27
5855345	1		99.4913	0.777342	-0.109388	228	0.0259456		TGCAGTTATTACACATGCTCTTCCTACTGATGTAAAGTCTACCCATTTCATCAAGCCCACATTTTACAG	5855345	1.52834e-30	LFQT01003923.1_Scaffold01685	1982	3.95223e-27	C4	14727326	3.48099e-20	NC_027751.1_chromosome_C4	14727326	3.48337e-20	chrC04_random	2045380	1	5.93254e-20	CM004494.1_chromosome_B4	15743502	1.70251e-27
5836648	1		99.4913	0.778124	-0.108951	228	0.0257587		TGCAGTCGCCAAGCATCCCGTCGATCAGCGACACAAACTGCATAAAAAGAAAAGGAAAGTTATTTTTTA	5836648	1.52834e-30	LFQT01009274.1_Scaffold00063	127349	8.49476e-29		0	999		0	999		0	0	999	LFLV01002366.1scaffold_223.1	390459	7.921e-26
5865142	1		99.4913	0.793364	-0.100527	228	0.0222617		TGCAGGCTATTTTGGATATGCGTCAACATTTCTCACATCTTTTAC	5865142	1.78173e-17	LFQT01003675.1_Scaffold00210	53110	3.20144e-15		0	999		0	999		0	0	999	CM004491.1_chromosome_B1	3310395	1.41265e-15
5845522	1		99.4913	0.795229	-0.099508	228	0.0218527		TGCAGATCAAGTTCTTCTCTACAACTCTAGACTGAAGTTATTTCCAGGGAAGCTTAC	5845522	5.62783e-24	LFQT01001671.1_Scaffold01205	21430	4.84395e-20	Scaffold21974	92	5.52569e-17	NW_013638490.1_UnpScaffold21974	92	5.52945e-17	chrA09	30745402	4	4.3452e-15	LFLV01002134.1scaffold_791.1	24540	2.10402e-20
5845998	1		99.4913	0.801004	-0.0963651	228	0.020611		TGCAGGTTCATTCGGGATTTCCGCATCTGGATTTCTCGATGTTGACTTCCTTTTTTAC	5845998	1.60704e-24	LFQT01008997.1_Scaffold00925	33120	3.86162e-21		0	999		0	999		0	0	999	LFLV01002449.1scaffold_539.1	88374	6.02724e-21
5858501	1		99.4913	0.822247	-0.0849977	228	0.0163741		TGCAGTCAACAAATCTAAGAATGGAACTAAAGAGTGGTTAGATAACAAGTAAAGATTTAC	5858501	1.3077e-25	LFQT01000384.1_Scaffold01790	7436	2.44758e-23		0	999		0	999		0	0	999	LFLV01002427.1scaffold_2010.1	8407	1.06037e-23
5848009	1		99.4913	0.849196	-0.070992	228	0.0117294		TGCAGTCATCCCAAAATCGCTGATTAC		999		0	999		0	999		0	999		0	0	999		0	999
5836638	1		99.4913	0.850798	-0.0701734	228	0.0114785		TGCAGTCCTGGTCGAAAGCAGTATAATCGTGGAGAGTAGATAACTATTTTGAAGCATGTACGCTAAGTC	5836638	1.52834e-30	LFQT01004661.1_Scaffold00007	1547181	8.49476e-29		0	999		0	999		0	0	999	LFLV01002129.1scaffold_779.1	79740	1.70251e-27
5857746	1		99.4913	0.865333	-0.0628167	228	0.00933039		TGCAGCGAATTCACGTGATCCAAATTCAAGAAAATCAGATTATTTTAC	5857746	4.28913e-19	LFQT01006488.1_Scaffold00017	973740	7.86406e-17		0	999		0	999		0	0	999	LFLV01000357.1scaffold_478.1	108061	3.3123e-17
5831273	1		99.4913	0.875373	-0.0578071	228	0.00797995		TGCAGATCGCTAATAAGTACATCTAAGGTATTGGTTGTCTATTATGGTTACTCCTTTTTTTTAC	5831273	8.59634e-28	LFQT01003706.1_Scaffold00099	152696	1.62984e-25		0	999		0	999		0	0	999	LFLV01000368.1scaffold_369.1	135369	7.04089e-26
5836367	1		99.4913	0.889749	-0.0507326	228	0.00623388		TGCAGGGCAGTTTCCAAGTTTTTATTGCATTATAGGGAAGTTTCAGCTCTTGAGGTAGTTTTTAC	5836367	2.44442e-28	LFQT01006938.1_Scaffold00111	190743	4.64776e-26		0	999		0	999		0	0	999	CM004491.1_chromosome_B1	8783272	2.00657e-26
14793390	1		99.4913	0.891912	-0.0496779	228	0.00599011		TGCAGCACACTGTCCTTTCCTTCCCATGAAGCAGGCTCCAGCCAATCATAATTAC	14793390	6.88654e-23	LFQT01002803.1_Scaffold00355	89953	5.87442e-19	C8	6608349	1.44323e-17	NC_027755.1_chromosome_C8	6608349	1.44422e-17	chrCnn_random	9717972	12	2.43441e-17	LFLV01000753.1scaffold_75.1	266594	2.55677e-19
5865836	1		99.4913	0.892269	-0.0495042	228	0.00595039		TGCAGCCTCATAGTGGATGGAGGAAGTTGTGTGAATGTGGCCAATGAGACCTTGGTGAGAAAATTAGGA	5865836	1.52834e-30		0	999		0	999		0	999		0	0	999		0	999
5836431	1		99.4913	0.898571	-0.0464476	228	0.00527088		TGCAGGTGAGAAATCATCCTTGCAGGTGTGAGTACCCACAATACTGTGACTCTCAACAACAAAGATAAC	5836431	1.52834e-30	CM007198.1_chromosome_B4	25170732	8.49476e-29	C8	10586662	4.47121e-24	NC_027755.1_chromosome_C8	10586662	4.47425e-24	chrA08	7718241	2	1.63784e-25	LFLV01002393.1scaffold_67.1	639666	3.6593e-29
5835384	1		99.4913	0.924341	-0.0341676	228	0.00292567		TGCAGAATAAGTAAACATGGGGTTGTTGTTAGACTATGTGCAATGGCCCTGTTGAATTGAAAATTCAAT	5835384	1.52834e-30		0	999		0	999		0	999		0	0	999	LFLV01000990.1scaffold_835.1	66218	3.6593e-29
5836621	1		99.4913	0.933929	-0.029686	228	0.00222953		TGCAGTCCAACCCCCACAATATGCAAATATGTATGAAAAAGCAATAAAACACATAACTACACACATAAT	5836621	1.52834e-30	LFQT01006938.1_Scaffold00111	191410	8.49476e-29		0	999		0	999		0	0	999	CM004491.1_chromosome_B1	8782601	3.6593e-29
5855784|F|0--6:G>A	1		99.4913	0.93434	-0.0294953	228	0.00220186		TGCAGAGCCTCGACCCTAATATCTCACCTGTGAATCTTTATTGACTCCCCCAGATAGGTTATTGGTGTG	5855784	1.52834e-30	LFQT01004933.1_Scaffold00361	33280	3.95223e-27		0	999		0	999		0	0	999	LFLV01001333.1scaffold_940.1	28484	1.70251e-27
14766237	1		99.4913	0.953609	-0.0206297	228	0.00109789		TGCAGTCGGGGTTCATCTTCATGAAAGTCACGGGTCAAGAAAGATTAC	14766237	4.28913e-19	CM007197.1_chromosome_B3	76495835	7.86406e-17		0	999		0	999		0	0	999	CM004494.1_chromosome_B4	15815107	3.3123e-17
5860899	1		99.4913	0.956807	-0.0191755	228	0.000951574		TGCAGGAGGCAGATTATGGCTTCTGCGGAGACCGAATTTATCAGTGGTGGTGTACCTGAAGACGGATCA	5860899	1.52834e-30	LFQT01006938.1_Scaffold00111	90324	8.49476e-29		0	999		0	999		0	0	999	CM004491.1_chromosome_B1	8875127	3.6593e-29
5836906	1		99.4913	0.96374	-0.0160399	228	0.000670412		TGCAGCCTAGAGGTCTTCAACGCACTGGTAGTGGTGAGGATGGCCACCAGAAGCTTATGTTGGACGCTT	5836906	1.52834e-30		0	999		0	999		0	999		0	0	999		0	999
5836280	1		99.4913	0.964914	-0.0155113	228	0.000627684		TGCAGGATCAGAATTTTTACCTAATCCAATAGTCAGGACACATTTCCATAAATCTAACAAATTTACAGA	5836280	1.52834e-30	LFQT01004661.1_Scaffold00007	696626	1.42147e-26		0	999		0	999		0	0	999	LFLV01000224.1scaffold_310.1	246335	2.20233e-26
5851506|F|0--45:T>G	1		99.4913	0.968133	-0.014065	228	0.000517735		TGCAGATTCATATACTCCATTGTCAAGAAGGATCATCAAACGTTTTTTGGTACACTCAGTAGCATAGTG	5851506	1.52834e-30	LFQT01003164.1_Scaffold00092	170464	3.95223e-27		0	999		0	999		0	0	999	LFLV01002509.1scaffold_416.1	75118	1.70251e-27
5835729	1		99.4913	0.971226	-0.0126795	228	0.000422056		TGCAGATTCTGTTCAAAACATTTTCAGAATTCAAATCCTTTCAAAGAGCTTTTCCCTTTTTTTTGTTTA	5835729	1.52834e-30	LFQT01007888.1_Scaffold00227	97214	8.49476e-29		0	999		0	999		0	0	999	CM004496.1_chromosome_B6	4024551	3.6593e-29
14765643	1		99.4913	0.978895	-0.00926409	228	0.000227031		TGCAGGTTGATGGATTTTGGATCGTGGATACCCGCTGACCCGCATAATTTAC	14765643	2.92937e-21	LFQT01004661.1_Scaffold00007	929893	5.28698e-19		0	999		0	999		0	0	999	LFLV01000224.1scaffold_310.1	54838	1.07443e-17
5832892	1		99.4913	0.982856	-0.00751011	228	0.000149791		TGCAGCTTCAGGTTCAGGGATTACAGTCCCCTGAGCATCTAACTTTTGACCTGTTGCATTAC	5832892	1.06146e-26	CM007197.1_chromosome_B3	17213894	2.00021e-24	C5	23184132	1.06474e-14	NC_027752.1_chromosome_C5	23184132	1.06547e-14	chrAnn_random	11080926	14	2.33751e-13	LFLV01002123.1scaffold_938.1	16803	8.65256e-25
5844219	1		99.4913	0.989175	-0.004727	228	5.97e-05		TGCAGGTGAATGAATAAAAAAATCGAACCTGCATTAC		999		0	999		0	999		0	999		0	0	999		0	999
5857578|F|0--9:A>C	1		99.7916	0.319744	-0.495198	228	0.321854		TGCAGCAGGACATTCTTATGAATTCCTTTAC	5857578	5.28297e-10		0	999		0	999		0	999		0	0	999		0	999
5852562|F|0--20:T>C	1		99.828	0.338552	-0.470374	228	0.297719		TGCAGCGATAAAAGAGATGATGCCTGAGGAAGCATGGAGTGGAAACACACCAAAAGTTGATCACTTCAG	5852562	1.52834e-30	LFQT01009274.1_Scaffold00063	122138	3.95223e-27		0	999		0	999		0	0	999	LFLV01002366.1scaffold_223.1	385190	3.6593e-29
5830024	1		99.828	0.541218	-0.266628	228	0.121193		TGCAGAAATGACACGATATGATCACAGATCCTAAATATCATAATATCCTACAGCAAGTAATAACAAAGG	5830024	1.52834e-30	CM007197.1_chromosome_B3	78430065	8.49476e-29	Scaffold01507	2756	4.53492e-14	NW_013618041.1_UnpScaffold01507	2756	4.53801e-14	chrC07	29003473	1	7.72871e-14	LFLV01000976.1scaffold_873.1	26090	1.70251e-27
5836131	1		99.828	0.731173	-0.13598	228	0.0383006		TGCAGCTGCTGCAAGCGGCGATGGTGGACGCAGATGATGATGAAAATCGGGAACGTTTGGTTTTCAAAT	5836131	1.52834e-30	LFQT01002854.1_Scaffold00018	133198	8.49476e-29	C2	1552641	9.74717e-16	NC_027749.1_chromosome_C2	1552641	9.75382e-16	chrC08	12587433	2	1.66118e-15	LFLV01002393.1scaffold_67.1	393268	7.921e-26
14792601	1		100.467	0.148114	-0.829405	228	0.68165		TGCAGATTGTTGATTTATCTTCTCTGTTGTCATTAC	14792601	1.24354e-12	LFQT01002891.1_Scaffold00102	244294	3.08296e-08		0	999		0	999		0	0	999		0	999
14757905	1		100.501	0.671059	-0.173239	228	0.0585332		TGCAGCCGCCCCGCATAAATTATTCATAACCCACACCCGCATCCGCGAACCGATTTTTTTAC	14757905	1.06146e-26	LFQT01004661.1_Scaffold00007	929942	2.00021e-24		0	999		0	999		0	0	999	LFLV01000224.1scaffold_310.1	54778	3.11202e-24
5866065	1		100.501	0.733381	-0.13467	228	0.0376491		TGCAGTCAGCATTATGGCTATAGACACTACTGAAGTATTAGGATTAC	5866065	1.48755e-18	LFQT01004661.1_Scaffold00007	1821213	2.71057e-16		0	999		0	999		0	0	999	LFLV01002489.1scaffold_996.1	22282	1.19132e-16
5860865|F|0--34:T>G	1		101.143	0.307042	-0.512802	228	0.339244		TGCAGGACTGTGAGCCTAGGATCTACGAGACGGTTGATCCACGGGATGGATTGTCATAGAATATCTTTT	5860865	1.52834e-30	LFQT01000063.1_Scaffold00108	205388	8.49476e-29		0	999		0	999		0	0	999	CM004491.1_chromosome_B1	6443786	3.6593e-29
5863584	1		101.143	0.548613	-0.260734	228	0.116813		TGCAGTGTCTAAAAATTTGAATATGACGGCAAGTAGAAACTTGGTTGTGTATGGCCCAGTTGATGAAGC	5863584	1.52834e-30	LFQT01001142.1_Scaffold00558	60203	8.49476e-29		0	999		0	999		0	0	999	LFLV01001017.1scaffold_1018.1	7631	3.6593e-29
5865466	1		101.143	0.884303	-0.0533991	228	0.00686946		TGCAGATGCACTAAAACCAGAAGATGGTGATTTCACAAGAGTATGTCCTGCTTTGAGAAATGATGATCG	5865466	1.52834e-30	CM007190.1_chromosome_A6	7389544	3.95223e-27	C9	14827081	2.06558e-27	NC_027756.1_chromosome_C9	14827081	2.06699e-27	chrUnn_random	7301206	6	3.52031e-27	CM004491.1_chromosome_B1	1627802	1.70251e-27
5851692|F|0--46:C>A	1		102.49	0.370907	-0.430735	228	0.26018		TGCAGCAAATGGAGCGTTCGACTTAGCCCCTCCACACCCAGATACCCGCAAGGAAATGGTCAGGCCGAG	5851692	1.52834e-30	LFQT01001648.1_Scaffold00206	132560	8.49476e-29		0	999		0	999		0	0	999	CM004491.1_chromosome_B1	1738384	3.6593e-29
5850501|F|0--25:A>G	1		102.49	0.560219	-0.251642	228	0.110158		TGCAGAGAAAGTAATGGCAGGGGACATCAAAGTTATTGTTACGATAGATGTGAAGGAGGATGGAGCGGA	5850501	1.52834e-30	LFQT01009221.1_Scaffold00137	74668	1.83879e-25		0	999		0	999		0	0	999	CM004491.1_chromosome_B1	4571668	3.6593e-29
5833650	1		102.49	0.57815	-0.237959	228	0.100383		TGCAGGTATCAAGACTGCCATGTTTACCCTGTTGTGGGAACCGAAATTCGCACTGTCGATTTTCCTTAC	5833650	1.52834e-30	CM007185.1_chromosome_A1	24095027	8.73858e-09		0	999		0	999		0	0	999		0	999
5842742	1		102.49	0.661769	-0.179294	228	0.0621097		TGCAGATTTTCCGTCGTCGAGGATGAGAGCAATGTGGCTCCGAGTTTTTAC	5842742	1.02066e-20	CM007197.1_chromosome_B3	76546409	2.36869e-17		0	999		0	999		0	0	999	LFLV01001939.1scaffold_1821.1	2426	1.03606e-17
5865545|F|0--45:A>G	1		102.49	0.986497	-0.00590416	228	9.29e-05		TGCAGCGTTCCTTGGAAAGGAACAGATAAATGAGGTACAAGCTACACTTGAGAATGTTAC	5865545	1.3077e-25	LFQT01004509.1_Scaffold00123	167801	4.09566e-21		0	999		0	999		0	0	999	CM004494.1_chromosome_B4	2697997	1.77437e-21
5834393	1		103.5	0.3123	-0.505428	228	0.331933		TGCAGTGACATTGACCAATGTAGGAACCAATAGTGATTGGCAGTGGTCAAAATTATGCATTAC	5834393	3.02152e-27	LFQT01006488.1_Scaffold00017	840325	9.55759e-23		0	999		0	999		0	0	999	CM004494.1_chromosome_B4	15526906	4.13158e-23
14789987	1		103.5	0.342687	-0.465102	228	0.292653		TGCAGCTGCACCCCGGCGCCCGAGCCTTTGTTTGGGGAGGAGCCGTCCACATGTAGTATCCAGTTCTGA	14789987	1.52834e-30	CM007199.1_chromosome_B5	38661054	3.95223e-27		0	999		0	999		0	0	999	CM004495.1_chromosome_B5	32027359	7.921e-26
4121421	1		103.5	0.406283	-0.391172	228	0.224062		TGCAGCAACACACCTCACAAATTTCCACGCACCTCTCTCATAACCAGGATCAGCTCTTCGGTTTAGAGA	4121421	7.11069e-29	LFQT01000133.1_Scaffold04432	2015	3.95223e-27	C6	17625874	5.78387e-23	NC_027753.1_chromosome_C6	22196534	5.78781e-23	chrAnn_random	25088369	12	9.85725e-23	LFLV01001572.1scaffold_743.1	60805	2.20233e-26
5832721	1		103.5	0.591687	-0.227908	228	0.0933935		TGCAGCTCTTCAGGAGGGGGATGCTTATCATGATGCATCTGTTGGTTTTGCGATAGTGTTAC	5832721	1.06146e-26	LFQT01006731.1_Scaffold09643	348	4.3297e-21		0	999		0	999		0	0	999	CM004491.1_chromosome_B1	11853865	4.05423e-18
5846281	1		103.5	0.728637	-0.137489	228	0.0390568		TGCAGAAAAATTTCAAAAGAAACTAAGTAGAAGTTTCAGTCTAAAACTTTTTAC	5846281	2.40607e-22		0	999		0	999		0	999		0	0	999		0	999
5854806|F|0--38:C>T	1		103.5	0.737441	-0.132273	228	0.0364673		TGCAGTCCACCGACGGATTACCCGTCACCTTATCCACACTTGAAGTGGATATGATTTACGAGGAGGTAA	5854806	1.52834e-30	LFQT01002206.1_Scaffold00076	217902	1.42147e-26	Scaffold01040	6790	7.42916e-27	NW_013617613.1_UnpScaffold01040	6790	7.43423e-27	chrC07	4523605	14	1.26613e-26	CM004491.1_chromosome_B1	5303545	6.12331e-27
5843557	1		103.5	0.746591	-0.126917	228	0.0338804		TGCAGCTGCCACACAGGGCGACAACTGACTTTCCAGAGCAGATCGATAGCCTTTAC	5843557	1.96942e-23		0	999		0	999		0	999		0	0	999		0	999
5863036	1		103.5	0.951538	-0.0215737	228	0.00119819		TGCAGATGGGCAAGAGTGGAGGTTTTATTCTGTTTCTTTTGGTTGTGTGTGTGTGGTAGTTGTATTGGC	5863036	1.52834e-30	LFQT01004661.1_Scaffold00007	1421823	1.83879e-25		0	999		0	999	chrC09	35827770	1	9.92723e-18	CM004491.1_chromosome_B1	8035385	2.23372e-16
5865364|F|0--37:C>T	1		103.837	0.00812176	-2.09035	228	2.30851		TGCAGCTCCACCTGCTTGTCAAAATCCTCCTGCCCTGCTTCTGAAATGGACTCAGCTGAAACTTTACAG	5865364	7.11069e-29	LFQT01004661.1_Scaffold00007	830741	1.83879e-25	Scaffold14396	135	1.60813e-23	NW_013630914.1_UnpScaffold14396	135	1.60923e-23	chrCnn_random	33304104	14	2.74068e-23	LFLV01000924.1scaffold_88.1	421155	1.32546e-23
5865867|F|0--21:G>A	1		103.837	0.108557	-0.964343	228	0.840137		TGCAGGCTCTTGTGATCCCTCGTGGGACCTTGCTCTTGGCCTTCGCAGTTAC	14792382	1.3629e-19	LFQT01000063.1_Scaffold00108	4411	5.28698e-19		0	999		0	999		0	0	999	LFLV01001572.1scaffold_743.1	44429	1.07443e-17
5834551	1		103.837	0.121731	-0.914599	228	0.781034		TGCAGTGGGATATTGTGAGAGCGGCTATGTGGGTTTATATATTCTAGATTTCAGACTTTCAGTATTATT	5834551	1.52834e-30	CM007197.1_chromosome_B3	78521525	5.18538e-16		0	999		0	999		0	0	999	LFLV01001616.1scaffold_2898.1	1850	3.6593e-29
5851290|F|0--51:T>G	1		103.837	0.144915	-0.838887	228	0.692589		TGCAGATCTCAAGCATGACACAATGGTATGTACAAAGGTTCTTGCTTGATTTTATTCTTGTCTTACCCT	5851290	1.52834e-30	LFQT01009236.1_Scaffold00163	68294	8.49476e-29		0	999		0	999		0	0	999	CM004496.1_chromosome_B6	27107674	3.6593e-29
5862984|F|0--7:A>G	1		103.837	0.147859	-0.830151	228	0.68251		TGCAGATAGAAGCCATGATGTCTGAGATCATAAATGAGATTTTAGAGTTTAGAAGACTAATCTGAGAGT	5862984	1.52834e-30	LFQT01007325.1_Scaffold01062	1295	8.49476e-29		0	999		0	999		0	0	999		0	999
5844285	1	B01	103.837	0.170209	-0.769018	228	0.612772		TGCAGGTTCCTATAATTCAACGCAAAGTTCGCCTACTCTTTTAC	5844285	6.15192e-17	CM007195.1_chromosome_B1	28591867	6.59991e-12		0	999		0	999	chrCnn_random	11166753	1	7.60441e-11	CM004491.1_chromosome_B1	4869480	6.27367e-14
5860556	1		103.837	0.232269	-0.634008	228	0.46435		TGCAGCTCAGCTCATTTCACCCGAACCTTAGTAGGATCGAGTTGACTTAGAGGCAATCCAGCTTCATTG	5860556	7.11069e-29	LFQT01006488.1_Scaffold00017	718066	1.83879e-25		0	999		0	999		0	0	999	CM004494.1_chromosome_B4	15636384	7.921e-26
5851543	1		103.837	0.235992	-0.627103	228	0.456994		TGCAGATTGAGTATGCAGATTTGCTTGAAGGCAGAGGATGATAAATGGGGAAAGAAGGTGGATAGAGAT	5851543	1.52834e-30	CM007199.1_chromosome_B5	41066624	3.95223e-27	C7	5801338	5.78387e-23	NC_027754.1_chromosome_C7	5801338	5.78781e-23	chrC07	9917935	1	7.62012e-24	CM004495.1_chromosome_B5	27061367	1.70251e-27
5839877	1		103.837	0.244903	-0.611006	228	0.439948		TGCAGCTGGACTGAGACTTTCACGTACATGACCCTTTGCTAAAAGTTTTTCCACTTGTCTTTAC	5839877	8.59634e-28	LFQT01005330.1_Scaffold00675	35475	2.10833e-24		0	999		0	999		0	0	999	CM004494.1_chromosome_B4	12577717	9.10796e-25
5862984|F|0--22:T>G	1		103.837	0.258338	-0.587812	228	0.415637		TGCAGATAGAAGCCATGATGTCTGAGATCATAAATGAGATTTTAGAGTTTAGAAGACTAATCTGAGAGT	5862984	1.52834e-30	LFQT01007325.1_Scaffold01062	1295	8.49476e-29		0	999		0	999		0	0	999		0	999
5861108|F|0--46:G>A	1		103.837	0.267639	-0.572451	228	0.399707		TGCAGGTAGTTTGGTTGCTAAGCATGATAACTCAGGTGTCACTTTGGAAGGACCCAATGATCTTCCCCA	5861108	1.52834e-30	LFQT01004661.1_Scaffold00007	1127592	1.83879e-25		0	999		0	999	chrCnn_random	52936115	2	7.67422e-19	LFLV01000654.1scaffold_327.1	110141	1.70251e-27
5829927	1		103.837	0.308141	-0.511251	228	0.337702		TGCAGAAACGAGACTGGAGGGAAGAGAGAGAGAGAGAGTTTTATGAGTTTTGGAGATGGTCAAGTTTGC	5829927	1.52834e-30	CM007196.1_chromosome_B2	19026093	6.61348e-25		0	999		0	999		0	0	999	LFLV01001881.1scaffold_234.1	197058	2.8489e-25
5864493|F|0--45:A>G	1		103.837	0.309006	-0.510033	228	0.336494		TGCAGCGACCACACTTGAGGTCAGATAAATGAAGCTGTTGATTCGAAGACTTCTAATAGCATTTGTGGT	5864493	1.52834e-30		0	999		0	999		0	999		0	0	999		0	999
5834292	1		103.837	0.327223	-0.485156	228	0.312036		TGCAGTCGCCGAGCATCCTGTCGATCAGCGACACAAACTGCATAAAAAGAGAAGGAAAGTCATTTTTTA	5834292	1.52834e-30	LFQT01000824.1_Scaffold02070	2648	6.61348e-25		0	999		0	999		0	0	999	LFLV01002366.1scaffold_223.1	390459	7.921e-26
5837075	1		103.837	0.362554	-0.440627	228	0.269427		TGCAGAGATCATGAGCGTGTGCGTCATGAGGCTGAGACACATTATCAAGTCTTACGCCATGGTTACAGA	5837075	1.52834e-30		0	999		0	999		0	999		0	0	999	CM004497.1_chromosome_B7	32368249	6.12331e-27
19819040	1		103.837	0.375504	-0.425386	228	0.255214		TGCAGCTCATCGATCCCAACCCTTTCATTATGAGTTCTCACTAACTCCATAATTAGGTTGTTGGTGAGC	19819040	1.52834e-30	LFQT01007751.1_Scaffold03166	4437	8.55507e-24	C5	11540570	9.67846e-21	NC_027752.1_chromosome_C5	11540570	9.68506e-21	chrC05	10946677	13	1.64947e-20	CM004495.1_chromosome_B5	19846020	3.68528e-24
5848222	1		103.837	0.381291	-0.418744	228	0.249084		TGCAGTCTCTGTTCTTGCGTAACAGATTCAGCAAAGATTTTAC	5848222	2.12043e-16		0	999		0	999		0	999		0	0	999		0	999
14787027|F|0--41:A>T	1		103.837	0.384336	-0.415289	228	0.24591		TGCAGATGGAAGCCATGATGTCGGAGATCATAAATGAGATTATAGAGTTTAGAAGAGTAATCTGAGAGT	14787027	1.52834e-30		0	999		0	999		0	999		0	0	999		0	999
5865506	1		103.837	0.3874	-0.411841	228	0.242753		TGCAGATTTTCCGTTGTCGAGGATGAGAGGAATGTGGCTCCGAGTTTTAC	5865506	3.55254e-20		0	999		0	999		0	999		0	0	999		0	999
5865057	1		103.837	0.395925	-0.402387	228	0.234155		TGCAGCGATGCACAAGATTGGTGAAGATGAGATAAGAAGCTACGAGATTCTGTATCTATTAC	5865057	1.06146e-26	LFQT01008876.1_Scaffold00179	55604	4.3297e-21		0	999		0	999		0	0	999	LFLV01002161.1scaffold_515.1	113511	4.02565e-23
5859871|F|0--50:C>T	1		103.837	0.396108	-0.402186	228	0.233973		TGCAGATCAGAAACTGAAACCGTATCCTCTGCTTCAACCGTGCTCTGATACCACTTGTGATGTATTTAC	5859871	1.52834e-30	CM007202.1_chromosome_B8	30168548	1.42147e-26		0	999		0	999		0	0	999	LFLV01000996.1scaffold_352.1	190473	6.12331e-27
5855549|F|0--44:C>G	1		103.837	0.396437	-0.401826	228	0.233647		TGCAGTTGTGTTTGCACTTCGAATTTGGCGATCGTATTTATATGCTGAGAAAATCCAAGTATTCACCGA	5855549	1.52834e-30	LFQT01001912.1_Scaffold00647	49348	1.42147e-26	C6	30381736	1.61955e-18	NC_027753.1_chromosome_C6	9440672	1.62065e-18	chrC06_random	1202774	3	2.76014e-18	CM004491.1_chromosome_B1	5455652	1.70251e-27
5865477|F|0--45:A>T	1		103.837	0.400227	-0.397693	228	0.229916		TGCAGATATCTTGCTTTATTGCCCCTGTAGAAGGTGTATAACAGAAATTTGTGAGAGAAATTGTGGTGA	5865477	1.52834e-30	LFQT01007535.1_Scaffold02163	6640	3.95223e-27		0	999		0	999		0	0	999		0	999
5851719|F|0--12:G>A	1		103.837	0.424188	-0.372442	228	0.207479		TGCAGCAACAGTGGAAATAGTTGCTGTATAATTCAGAAGCTCGGATCTAGCTGAAAACCCTAATGCATC	5851719	1.52834e-30	LFQT01009533.1_Scaffold00144	49565	1.83879e-25		0	999		0	999		0	0	999	LFLV01000692.1scaffold_577.1	130515	7.921e-26
5836308	1		103.837	0.432636	-0.363877	228	0.200015		TGCAGGCATAATAATCTTACAAACAATTATAAGGAGATGCATTATCAATTCAAAGACCATTAC	5836308	3.02152e-27	LFQT01004661.1_Scaffold00007	918875	5.71164e-25		0	999		0	999		0	0	999	LFLV01000224.1scaffold_310.1	69758	2.46904e-25
5862111|F|0--33:C>G	1		103.837	0.455531	-0.341482	228	0.180864		TGCAGATATGTTTCCAATGATCTGTAATCCCAACCAAAATTAC	5862111	2.12043e-16	LFQT01008876.1_Scaffold00179	27596	1.74327e-12		0	999		0	999		0	0	999		0	999
5866078	1		103.837	0.464616	-0.332906	228	0.173677		TGCAGTCTCTTGAACAGAGCTCTGGTAAGTTTGCCGGAGAGTTTCGGAGGATCCTCAATAACTGAAAGC	5866078	1.52834e-30	LFQT01004871.1_Scaffold00301	28658	8.55507e-24		0	999		0	999		0	0	999	CM004492.1_chromosome_B2	32990811	1.70251e-27
5850020	1		103.837	0.470416	-0.327518	228	0.169205		TGCAGAATAAGTAAACATGGGGTTGTTGTTAGACTATGTGCAATGCCCTGTTGAATTGAAAATTCAATT	5850020	1.52834e-30		0	999		0	999		0	999		0	0	999	LFLV01000990.1scaffold_835.1	66218	1.70251e-27
5851836	1		103.837	0.476226	-0.322187	228	0.164814		TGCAGCAATTCTTGAAGCGTATGTTTGCTCGGCACTTATCTTGCTCGTCAATATTTGTGGTTTATGAGA	5851836	1.52834e-30	CM007196.1_chromosome_B2	19895752	3.95223e-27		0	999		0	999		0	0	999	CM004491.1_chromosome_B1	2146442	1.70251e-27
5865666|F|0--38:A>C	1		103.837	0.489928	-0.309868	228	0.154798		TGCAGGTGTGACTTAGGATCCGTCGTACCGTCATAGACAGGGATTTTAC	5865666	1.23513e-19	LFQT01003071.1_Scaffold00150	182519	1.70225e-13		0	999		0	999		0	0	999	LFLV01002456.1scaffold_967.1	22363	7.46861e-14
14792436	1		103.837	0.509437	-0.29291	228	0.141321		TGCAGCTGAGCCGAAGTTTCCGAGCTCCAGCTCCTCGACTGTGAACCGCTTAC	14792436	8.39926e-22		0	999		0	999		0	999		0	0	999		0	999
5853820	1		103.837	0.510498	-0.292006	228	0.140613		TGCAGGCTATATACACAACTTGTAAAGTACCAAGGGACAGGTGAGTAATTTCGCCTCTGTTTCTCTTTC	5853820	1.52834e-30	CM007198.1_chromosome_B4	25256377	1.83879e-25		0	999		0	999		0	0	999	LFLV01002393.1scaffold_67.1	562596	3.6593e-29
5862325|F|0--39:G>A	1		103.837	0.521462	-0.282777	228	0.133448		TGCAGCTATACTCGTCACCACATCTAACCCTGTACCGAGGTTTTGATTTCTTTAC	5862325	6.88654e-23	CM007197.1_chromosome_B3	38417264	5.87442e-19		0	999		0	999	chrA08	7183181	1	1.46514e-14	LFLV01000990.1scaffold_835.1	63611	2.55677e-19
5861108	1		103.837	0.542092	-0.265927	228	0.120669		TGCAGGTAGTTTGGTTGCTAAGCATGATAACTCAGGTGTCACTTTGGAAGGACCCAATGATCTTCCCCA	5861108	1.52834e-30	LFQT01004661.1_Scaffold00007	1127592	1.83879e-25		0	999		0	999	chrCnn_random	52936115	2	7.67422e-19	LFLV01000654.1scaffold_327.1	110141	1.70251e-27
5856751|F|0--21:A>C	1	B01	103.837	0.54366	-0.264672	228	0.119734		TGCAGAAGCACTTTCGCCTGGAAAATAGGGGAGATGCGTTGGGGGAGGTTAC	5856751	2.92937e-21	CM007195.1_chromosome_B1	30189322	2.45979e-17		0	999		0	999		0	0	999	LFLV01002393.1scaffold_67.1	933666	1.07443e-17
5844034	1		103.837	0.54614	-0.262696	228	0.118266		TGCAGGGAAAATGTTCATTTGCCGTCAAAATTTGGTTAC	5844034	3.1445e-14	LFQT01006521.1_Scaffold00106	23073	4.94993e-12		0	999		0	999		0	0	999		0	999
5855898|F|0--11:A>C	1		103.837	0.548761	-0.260616	228	0.116726		TGCAGCAACAAAAAGAACAGCTGCCACAACAACAAGGTCAGACTATGATGGCTAATTACTCGGGTGCAA	5855898	1.52834e-30	CM007197.1_chromosome_B3	78473664	3.95223e-27		0	999		0	999		0	0	999	LFLV01001116.1scaffold_744.1	62303	1.70251e-27
5852597	1		103.837	0.553844	-0.256613	228	0.113781		TGCAGCGCCCGAAACACATCCTTGAACTCCTGAACCAACGGGATCCGTCCGGGATACCACCCCCTACAA	5852597	1.52834e-30	LFQT01006491.1_Scaffold01768	9583	8.55507e-24		0	999		0	999		0	0	999	LFLV01000479.1scaffold_1722.1	7327	3.68528e-24
5865058|F|0--49:A>C	1		103.837	0.556771	-0.254324	228	0.112108		TGCAGCGATGCACAAGATTGGTGAAGATGAGATAAGAAGCTACGAGATTATGTATCTCTTAC	5865058	1.06146e-26	LFQT01008876.1_Scaffold00179	55604	2.00021e-24		0	999		0	999		0	0	999	LFLV01002161.1scaffold_515.1	113511	4.02565e-23
5849691|F|0--12:T>C	1		103.837	0.561721	-0.250479	228	0.109316		TGCAGAACATGGTCGCAACACTGATACTCATGCAAGAAAATGAAGGTAACCTGCGTGACCAAGAAGGTC	5849691	1.52834e-30	LFQT01004372.1_Scaffold00463	66230	3.05526e-28		0	999		0	999		0	0	999	LFLV01001523.1scaffold_2179.1	2475	6.12331e-27
5864835|F|0--59:C>A	1		103.837	0.564393	-0.248419	228	0.107829		TGCAGGTGACATAAGACCAGCTAAAGCAAGGGCTCACAAAATCTCTTGTCCATCTAAGACGATTGCTTG	5864835	1.52834e-30	CM007193.1_chromosome_A9	2887978	3.95223e-27	C3	36829589	4.47121e-24	NC_027750.1_chromosome_C3	36829589	4.47425e-24	chrC03	35095009	2	7.62012e-24	LFLV01001889.1scaffold_1096.1	8730	1.70251e-27
5850550|F|0--67:A>C	1		103.837	0.565746	-0.247379	228	0.107081		TGCAGAGAATCGATCCTAACCTTTCAAATGTGAGTCCTCACTGACTCCCCCATGAAGGTGATACAGGAT	5850550	1.52834e-30	LFQT01000063.1_Scaffold00108	205454	1.09887e-27		0	999		0	999		0	0	999	CM004491.1_chromosome_B1	6443852	4.73361e-28
5865767|F|0--30:A>G	1		103.837	0.567003	-0.246415	228	0.106389		TGCAGATAAATGTGAATGTTCGAGGATAGCAACGAAGATCGACGAAAAATGGAATATTTCCAAAAGAGA	5865767	1.52834e-30	LFQT01007236.1_Scaffold00536	38444	1.42147e-26	C4	16284151	4.53492e-14	NC_027751.1_chromosome_C4	16284151	4.53801e-14	chrC01	26309249	3	1.66118e-15	CM004491.1_chromosome_B1	6330412	6.12331e-27
5857747	1		103.837	0.571496	-0.242987	228	0.10394		TGCAGCGAATTCACGTGATCCGAGTTCAAGAAAATCAGATTATTTTAC	5857747	4.28913e-19	CM007194.1_chromosome_A10	4601250	3.68477e-10		0	999		0	999		0	0	999		0	999
5837307	1	B01	103.837	0.581901	-0.235151	228	0.0984134		TGCAGCCTCAAGTTATCAGCCTGCCACCAAGAAATGCCCTATGAACTTCCATTATAGGATATATATCTC	5837307	1.52834e-30	CM007195.1_chromosome_B1	28258631	8.49476e-29	C3	24899873	4.53492e-14	NC_027750.1_chromosome_C3	24899873	4.53801e-14	chrC03	22967678	1	7.72871e-14	CM004491.1_chromosome_B1	13302989	2.8489e-25
5844402	1		103.837	0.590171	-0.229022	228	0.0941601		TGCAGTAATGATGTAATGGTGATAAGAAGCAGCCTTATAACCACATCGATTTTTAC	5844402	1.96942e-23	CM007198.1_chromosome_B4	25118822	4.69258e-20		0	999		0	999		0	0	999		0	999
5865475|F|0--33:A>G	1		103.837	0.591619	-0.227958	228	0.0934281		TGCAGATATCTTGCTTTATTGCCCCTGTAGAAGATGTGTAACAGAAATTTTTGAGAGAAATTGTGGTGA	5865475	1.52834e-30	LFQT01007535.1_Scaffold02163	6640	1.83879e-25		0	999		0	999		0	0	999	CM004491.1_chromosome_B1	11844552	1.72677e-17
5859063	1		103.837	0.595089	-0.225418	228	0.0916883		TGCAGCCTCTCTTTGATATCTTCATCATCCCATTAGTTTTAC	5859063	7.29484e-16		0	999		0	999		0	999		0	0	999		0	999
14781761	1		103.837	0.597123	-0.223936	228	0.0906782		TGCAGCCTTAGGAGAAAACATTGAAGAATCAAAGCTAGTGAAATTTTTTCTTAC	14781761	2.40607e-22	LFQT01009609.1_Scaffold00263	31025	9.50231e-17		0	999		0	999		0	0	999	CM004494.1_chromosome_B4	13021491	1.91275e-20
5832252	1		103.837	0.612192	-0.213112	228	0.0834153		TGCAGCCGGGGGAGGTACGGCATCGTCTAATTCCGGGTCAGCTTGGTTCTGTCGGTGAGTTAC	5832252	3.02152e-27		0	999		0	999		0	999		0	0	999		0	999
5845315	1		103.837	0.612796	-0.212684	228	0.0831321		TGCAGAACAGCTCATCGCAGGAGCAAATTGAGCTAATAATTGTTGCTTAC	5845315	3.55254e-20	CM007197.1_chromosome_B3	30482249	6.33253e-18		0	999		0	999		0	0	999	LFLV01001881.1scaffold_234.1	216807	2.77394e-18
5865650|F|0--62:T>C	1		103.837	0.613468	-0.212208	228	0.0828179		TGCAGCTGTTTGGAGTGCTCGTCAAGTTTGCCCTTCAGGGTTTGGACTTCTTGGAGGAGCTCTGGACTA	5865650	7.11069e-29	CM007196.1_chromosome_B2	19047412	3.95223e-27		0	999		0	999		0	0	999	LFLV01002291.1scaffold_683.1	88449	1.70251e-27
5865440|F|0--7:T>G	1		103.837	0.616346	-0.210176	228	0.0814804		TGCAGTCTCCAGATTCATCTAGAAATTGAGATTTAGTGACCAAGTCTACTGAGGATGATTATTAC	5865440	2.44442e-28		0	999		0	999		0	999		0	0	999		0	999
5864462|F|0--23:A>G	1		103.837	0.624442	-0.204508	228	0.07779		TGCAGTTCTAGTGTAACGCCTGTACACATTCCTGATCCTTTCACTATAATACCAGTTCCCACCAACACT	5864462	1.52834e-30	LFQT01006488.1_Scaffold00017	917395	3.95223e-27		0	999		0	999		0	0	999	LFLV01000357.1scaffold_478.1	147008	7.921e-26
5864462|F|0--37:C>A	1		103.837	0.624442	-0.204508	228	0.07779		TGCAGTTCTAGTGTAACGCCTGTACACATTCCTGATCCTTTCACTATAATACCAGTTCCCACCAACACT	5864462	1.52834e-30	LFQT01006488.1_Scaffold00017	917395	3.95223e-27		0	999		0	999		0	0	999	LFLV01000357.1scaffold_478.1	147008	7.921e-26
5855346	1	B01	103.837	0.632807	-0.198729	228	0.0740881		TGCAGTTATTACACAGGCTCTTCCTACTGATGTAAAGTCTACCCATTTCATCAAGCCCACATATTACAG	5855346	1.52834e-30	CM007195.1_chromosome_B1	8145886	1.83879e-25	C4	14727326	5.78387e-23	NC_027751.1_chromosome_C4	14727326	5.78781e-23	chrC04_random	2045380	1	9.85725e-23	CM004494.1_chromosome_B4	15743502	3.68528e-24
5858588|F|0--38:G>C	1		103.837	0.639571	-0.194111	228	0.0711757		TGCAGTCTTTTACATTTCACAAGTAAAACTTTTGTTCTGTTTTGTTTAC	5858588	1.23513e-19	LFQT01006488.1_Scaffold00017	723972	1.01727e-15		0	999		0	999		0	0	999	CM004494.1_chromosome_B4	15625997	4.46326e-16
5865477|F|0--62:G>A	1		103.837	0.65989	-0.180528	228	0.0628483		TGCAGATATCTTGCTTTATTGCCCCTGTAGAAGGTGTATAACAGAAATTTGTGAGAGAAATTGTGGTGA	5865477	1.52834e-30	LFQT01007535.1_Scaffold02163	6640	3.95223e-27		0	999		0	999		0	0	999		0	999
5843775	1		103.837	0.66332	-0.178277	228	0.0615036		TGCAGGAATCAAATAGAATCATCAATCACTGAAAGCGAAAACACTGGACTCAGATTAC	5843775	1.60704e-24	LFQT01008876.1_Scaffold00179	57929	1.80939e-14		0	999		0	999		0	0	999	LFLV01002161.1scaffold_515.1	111173	1.29547e-22
5842041	1		103.837	0.663441	-0.178198	228	0.0614565		TGCAGACTCGACAACTGTTCCATCAAATCAAAAGGGTCAACAAAACTTTAC	5842041	1.02066e-20		0	999		0	999		0	999		0	0	999		0	999
14792382|F|0--38:T>G	1		103.837	0.667505	-0.175546	228	0.0598867		TGCAGGCTCTTGTGATCCCTCGTGGGACCTTGCTCTTGTCCTTCGCAGTTAC	14792382	2.92937e-21	LFQT01000063.1_Scaffold00108	4411	2.45979e-17		0	999		0	999		0	0	999	LFLV01001572.1scaffold_743.1	44429	4.99885e-16
5846338	1		103.837	0.66842	-0.174951	228	0.0595363		TGCAGAAGTTTTTTAGTAGTCGGTTCAATTCTGTATCTCCAACATTTAC	5846338	1.23513e-19	CM007198.1_chromosome_B4	24971933	4.7329e-14		0	999		0	999		0	0	999	LFLV01002393.1scaffold_67.1	811973	2.07655e-14
5865871|F|0--22:C>T	1		103.837	0.675316	-0.170493	228	0.0569361		TGCAGGCTCTTGTGATCCCTCGCGGGGCCTTGCTCTTGGCCTTCGCAATTAC	5865871	2.92937e-21	LFQT01006040.1_Scaffold00059	163506	2.45979e-17		0	999		0	999		0	0	999	LFLV01000545.1scaffold_1202.1	11464	1.38987e-16
5846663	1		103.837	0.678804	-0.168255	228	0.0556467		TGCAGGTCCCATCTCTGTCCCAAAAATAAAAAACATGTTCAGTTGCTGAGACCAAGTTTAC	5846663	3.72679e-26		0	999		0	999		0	999		0	0	999		0	999
5862861|F|0--37:C>T	1		103.837	0.679559	-0.167773	228	0.0553702		TGCAGCATTTGTTGATGATGGTATGAATGTCCCCGTACGGTACATTGGCACAGTCTTGATTCCAGGTTT	5862861	1.52834e-30	CM007197.1_chromosome_B3	17372144	8.49476e-29		0	999		0	999		0	0	999	LFLV01001209.1scaffold_586.1	103685	3.6593e-29
5841479	1		103.837	0.685177	-0.164197	228	0.0533358		TGCAGAAACCTCGGCATCCAGCATACTACAATCCTCCTCCGTGCAACGGAAGTCCATTAC	5841479	1.3077e-25		0	999		0	999		0	999		0	0	999		0	999
5865556|F|0--24:T>G	1		103.837	0.686388	-0.16343	228	0.0529032		TGCAGCGTTCCTTGTGAAGGAACATATTAC	5865556	1.74175e-09		0	999		0	999		0	999		0	0	999		0	999
5865836|F|0--23:A>G	1		103.837	0.692851	-0.15936	228	0.0506285		TGCAGCCTCATAGTGGATGGAGGAAGTTGTGTGAATGTGGCCAATGAGACCTTGGTGAGAAAATTAGGA	5865836	1.52834e-30		0	999		0	999		0	999		0	0	999		0	999
5865478|F|0--60:C>T	1		103.837	0.694617	-0.158255	228	0.050017		TGCAGATATCTTGCTTTATTGCCCCTGTAGAAGGTGTATAACAGAAATTTTTGAGAGAAACTGTGGTGA	5865478	1.52834e-30	LFQT01007535.1_Scaffold02163	6640	3.95223e-27		0	999		0	999		0	0	999		0	999
5865239	1		103.837	0.704135	-0.152344	228	0.0467946		TGCAGATGCGCTTTTGGATTGGTGGTACCGTCGTAGACAGGAATTTTAC	5865239	1.23513e-19	LFQT01001837.1_Scaffold00727	28128	4.7329e-14		0	999		0	999		0	0	999	LFLV01001992.1scaffold_329.1	99785	4.46326e-16
14788290|F|0--15:A>G	1		103.837	0.704466	-0.15214	228	0.0466847		TGCAGGTTCATTCGGAATTTCCGCATCTGGATTTCTCGATGTTAC	14788290	1.78173e-17		0	999		0	999		0	999		0	0	999		0	999
5865368	1		103.837	0.715722	-0.145256	228	0.0430368		TGCAGCTCTTTTTATAGGTAATGGAGATGGAGACCTAGGTTTTTGTCATTCGGGCCGTAGAGAGGCCCG	5865368	7.11069e-29	CM007199.1_chromosome_B5	3922085	1.83879e-25		0	999		0	999		0	0	999	CM004495.1_chromosome_B5	5769863	7.921e-26
5856566|F|0--25:T>C	1		103.837	0.717603	-0.144116	228	0.0424434		TGCAGAAAAGCACTTGTACCATTGTTTGCTGGCTTGCTTAC	5856566	2.50443e-15		0	999		0	999		0	999		0	0	999		0	999
5834430	1		103.837	0.726024	-0.139049	228	0.0398446		TGCAGTGAGTTCTAGGCTTGTGATTTGAATCGATCGGGAACCGAGTATCTTCCCAAAGACAGTTTTACA	5834430	1.52834e-30		0	999		0	999		0	999		0	0	999		0	999
14788611|F|0--19:T>G	1		103.837	0.728806	-0.137388	228	0.0390061		TGCAGCAGCGTCAGCTTCTTGAACAGGGATTGCAGTCCCCTGATCATTAC	14788611	3.55254e-20		0	999		0	999		0	999		0	0	999	LFLV01001209.1scaffold_586.1	63526	1.29059e-16
14771110	1		103.837	0.729943	-0.136711	228	0.0386664		TGCAGAAGCAGAATCGCTGAGAATTTCTGCAATTAGAAAAAAAAAATTTCTTAC	14771110	2.40607e-22	CM007195.1_chromosome_B1	30106643	3.41764e-16	C2	37994155	3.91086e-13	NC_027749.1_chromosome_C2	37994155	3.91353e-13	chrC08	13970260	1	6.5894e-13	LFLV01002393.1scaffold_67.1	1026658	8.89915e-19
5855345|F|0--15:T>G	1		103.837	0.735169	-0.133613	228	0.0371261		TGCAGTTATTACACATGCTCTTCCTACTGATGTAAAGTCTACCCATTTCATCAAGCCCACATTTTACAG	5855345	1.52834e-30	LFQT01003923.1_Scaffold01685	1982	3.95223e-27	C4	14727326	3.48099e-20	NC_027751.1_chromosome_C4	14727326	3.48337e-20	chrC04_random	2045380	1	5.93254e-20	CM004494.1_chromosome_B4	15743502	1.70251e-27
5858271|F|0--43:A>G	1		103.837	0.735169	-0.133613	228	0.0371261		TGCAGGTAGATTTTGTTTGATAAGGACCCTAAACATCACAAAGAATTAC	5858271	1.23513e-19	CM007199.1_chromosome_B5	20447543	2.18648e-17		0	999		0	999		0	0	999	LFLV01000403.1scaffold_287.1	195294	4.46326e-16
5865363|F|0--11:T>C	1		103.837	0.735169	-0.133613	228	0.0371261		TGCAGCTCCACTTGCTTGTCAAAATCCTACTGCTCTGCTTCTGAAATGGACTCAGCTGAAACTTTACAG	5865363	1.52834e-30	LFQT01004661.1_Scaffold00007	830741	8.55507e-24	Scaffold14396	135	7.48191e-22	NW_013630914.1_UnpScaffold14396	135	7.48701e-22	chrCnn_random	33304104	14	1.27512e-21	LFLV01001116.1scaffold_744.1	68982	3.68528e-24
5865632|F|0--33:C>T	1		103.837	0.735169	-0.133613	228	0.0371261		TGCAGATCATACTCATCTTTCCATCAAAATCAGCGATCAATCTTCAATTTCCCGTAAAAGCTTGATTTA	5865632	1.52834e-30	LFQT01004294.1_Scaffold00156	29151	8.49476e-29		0	999		0	999		0	0	999	CM004493.1_chromosome_B3	21069512	3.6593e-29
5849429|F|0--68:T>C	1		103.837	0.735169	-0.133613	228	0.0371261		TGCAGAAAAATAGACGTGTAGTCAAAAAGGATAGATTGTATGTGTACTTAGGAAGCAAGTGATTTACAT	5849429	1.52834e-30	LFQT01004661.1_Scaffold00007	715694	3.05526e-28		0	999		0	999		0	0	999	LFLV01000224.1scaffold_310.1	234834	3.6593e-29
5849440|F|0--55:A>T	1		103.837	0.735169	-0.133613	228	0.0371261		TGCAGAAAACCAAGGAGCTGACTATCTTCTGGGTTCTCTCCATCTCCAGCCTATAAGACCAATCTTTTA	5849440	1.52834e-30	LFQT01009236.1_Scaffold00163	104190	8.49476e-29	C7	31397598	1.25199e-19	NC_027754.1_chromosome_C7	31397598	1.25284e-19	chrC03_random	2258511	1	2.13372e-19	CM004496.1_chromosome_B6	27134660	3.6593e-29
5850547|F|0--27:A>G	1		103.837	0.735169	-0.133613	228	0.0371261		TGCAGAGAATATAGTGAATATGGCATTACAGTTGAACTTTTACGCATTTTTTCTTCGTTGTCCATTACA	5850547	1.52834e-30	CM007196.1_chromosome_B2	20117803	5.11253e-26		0	999		0	999		0	0	999	CM004491.1_chromosome_B1	360020	2.20233e-26
5865582|F|0--16:T>C	1		103.837	0.735169	-0.133613	228	0.0371261		TGCAGCACACTGTCCTTTCCTTCCCATGAAGCAGTCTCCAGCCAATCTTTATTAC	5865582	6.88654e-23	LFQT01002803.1_Scaffold00355	89953	2.7331e-17	C8	6608349	5.1908e-17	NC_027755.1_chromosome_C8	6608349	5.19434e-17	chrCnn_random	9717972	12	8.7557e-17	LFLV01000753.1scaffold_75.1	266594	1.18955e-17
5865829|F|0--11:C>A	1		103.837	0.735169	-0.133613	228	0.0371261		TGCAGCCTCATCGTGTATGGAGGGAGTTGTGTGAATGTGGCCAGTGAGACCTTGGTGAGCAAATTAGGA	5865829	1.52834e-30	LFQT01008332.1_Scaffold03080	543	3.98029e-22		0	999		0	999		0	0	999	LFLV01001113.1scaffold_2065.1	10422	7.97723e-21
5846800	1		103.837	0.750671	-0.124551	228	0.0327609		TGCAGTTTTGACTCTAGCTTCAACTCCAAACCAAGAGTAGGTAACATATATTAC	5846800	2.40607e-22	CM007198.1_chromosome_B4	24969475	7.34574e-18		0	999		0	999		0	0	999	LFLV01002393.1scaffold_67.1	814430	3.20071e-18
5849478|F|0--5:A>C	1		103.837	0.755926	-0.121521	228	0.0313492		TGCAGAAAATTGATGAAATCGAAGAGTGTGGATGTGATTTGATCCCATGGAAGCCATTGAAACCCTTAC	5849478	1.52834e-30	CM007196.1_chromosome_B2	18751174	3.05526e-28		0	999		0	999		0	0	999	CM004492.1_chromosome_B2	13988309	1.31612e-28
14793201	1		103.837	0.761143	-0.118534	228	0.0299815		TGCAGTCTCCGGAACAGAGCTCTGGTGAGTTTGCCGGAGAGTTTCGGAAGATCCTCAATAACTGCAAGC	14793201	1.52834e-30	LFQT01007569.1_Scaffold02572	7802	3.95223e-27		0	999		0	999		0	0	999	LFLV01001741.1scaffold_753.1	104202	1.70251e-27
5833344	1		103.837	0.763557	-0.117158	228	0.0293599		TGCAGGCATAATAATCTTACAAACAATTATAAGGAGATGCATTATCAATTCAAAACCATTAC	5833344	1.06146e-26	LFQT01004661.1_Scaffold00007	918876	9.30608e-23		0	999		0	999		0	0	999	LFLV01000224.1scaffold_310.1	69758	4.02565e-23
5847892	1		103.837	0.770033	-0.11349	228	0.0277272		TGCAGTTGACGAGTTGTTTTGGCTCTCCAATTTCTTAC	5847892	1.07441e-13	LFQT01004554.1_Scaffold00423	48779	7.73079e-10		0	999		0	999		0	0	999	LFLV01001999.1scaffold_282.1	133679	7.49863e-12
5865871	1		103.837	0.782044	-0.106769	228	0.024833		TGCAGGCTCTTGTGATCCCTCGCGGGGCCTTGCTCTTGGCCTTCGCAATTAC	5865871	2.92937e-21	LFQT01006040.1_Scaffold00059	163506	2.45979e-17		0	999		0	999		0	0	999	LFLV01000545.1scaffold_1202.1	11464	1.38987e-16
5865256|F|0--10:A>G	1		103.837	0.785077	-0.105088	228	0.0241294		TGCAGCATGGAGCGGGCACTCCTTGCCAAAATCTGAGATATATGGAAAGTTTCATTAC	5865256	1.60704e-24	LFQT01004661.1_Scaffold00007	833010	2.98522e-22		0	999		0	999		0	0	999	CM004498.1_chromosome_B8	10435011	4.69242e-17
5857639|F|0--10:G>T	1		103.837	0.795767	-0.0992143	228	0.0217354		TGCAGCATTTGGTCCAAGCGGAATTTGGTTCACCAAGTCAGAAGGTTAC	5857639	1.23513e-19	LFQT01002477.1_Scaffold00275	39406	1.01727e-15		0	999		0	999		0	0	999	CM004493.1_chromosome_B3	18905824	4.46326e-16
5852875|F|0--33:A>C	1		103.837	0.801202	-0.0962579	228	0.0205692		TGCAGCTATCTGTGTAGAGGCTGTTGCAGTATCAATTATTGTACCTTTCATCAGCCAATCATTGAGAGA	5852875	1.52834e-30	LFQT01006521.1_Scaffold00106	142087	3.95223e-27		0	999		0	999		0	0	999	LFLV01000514.1scaffold_195.1	152866	1.70251e-27
5862910|F|0--13:C>A	1		103.837	0.801912	-0.0958732	228	0.0204194		TGCAGAGATAAAACAGAAACAGAAGCCAGACACACCTGATGCTAGGACTTTTCAAGGGTCCTTAC	5862910	2.44442e-28	LFQT01006488.1_Scaffold00017	386007	4.64776e-26		0	999		0	999		0	0	999	LFLV01001150.1scaffold_616.1	32359	2.00657e-26
5832774	1		103.837	0.807773	-0.0927106	228	0.019205		TGCAGCTGCAAGCGGCGATGGTGGACGCAGATGATGATGAAAATCGGGAACGTTTGGTTTTCAAATTTT	5832774	1.52834e-30	LFQT01002854.1_Scaffold00018	133205	1.42147e-26	C2	1552643	1.61955e-18	NC_027749.1_chromosome_C2	1552643	1.62065e-18	chrC08	12587435	3	2.76014e-18	LFLV01002393.1scaffold_67.1	393265	3.6593e-29
5850982|F|0--7:T>C	1		103.837	0.807896	-0.0926447	228	0.01918		TGCAGAGTGTTATCAAGATGGAGGAGCTATAATAACACGAACTCAAGGAAGGTGATTGAGCAATTACAG	5850982	1.52834e-30	CM007197.1_chromosome_B3	17372078	3.95223e-27		0	999		0	999		0	0	999	LFLV01001209.1scaffold_586.1	103619	1.70251e-27
5863906|F|0--37:G>A	1		103.837	0.808417	-0.0923644	228	0.0190739		TGCAGCTGGGTTGTTTCTTCTAGGTTCCTGGCAAACGGCAAAAGTTTTAC	5863906	3.55254e-20	LFQT01000625.1_Scaffold00427	35928	2.94624e-16		0	999		0	999		0	0	999	CM004496.1_chromosome_B6	27167101	1.29059e-16
5865829|F|0--15:T>G	1		103.837	0.808417	-0.0923644	228	0.0190739		TGCAGCCTCATAGTGTATGGAGGGAGTTGTGTGAATGTGGCCAGTGAGACCTTGGTGAGCAAATTAGGA	5865830	7.11069e-29	LFQT01008332.1_Scaffold03080	543	8.55507e-24		0	999		0	999		0	0	999	LFLV01001113.1scaffold_2065.1	10422	1.71459e-22
5865787|F|0--28:A>G	1		103.837	0.812339	-0.0902627	228	0.0182863		TGCAGCACTTGGACCCAGACCACGACATACCCATGCCCAACCTGGGATCTCTCTTCGCTCAGCACCTGG	5865787	1.52834e-30	LFQT01001318.1_Scaffold00886	5454	8.49476e-29		0	999		0	999		0	0	999	CM004492.1_chromosome_B2	20165983	1.70251e-27
5834214	1		103.837	0.813968	-0.0893929	228	0.0179643		TGCAGTCAGATCGAGCTTTGTGAAGCAGGCAGCTCCGTGTAACTCATCCAACATATCTTCAATCATTGG	5834214	1.52834e-30		0	999		0	999		0	999		0	0	999	LFLV01002393.1scaffold_67.1	42230	3.6593e-29
5865364|F|0--28:C>T	1		103.837	0.821802	-0.0852326	228	0.0164576		TGCAGCTCCACCTGCTTGTCAAAATCCTCCTGCCCTGCTTCTGAAATGGACTCAGCTGAAACTTTACAG	5865364	7.11069e-29	LFQT01004661.1_Scaffold00007	830741	1.83879e-25	Scaffold14396	135	1.60813e-23	NW_013630914.1_UnpScaffold14396	135	1.60923e-23	chrCnn_random	33304104	14	2.74068e-23	LFLV01000924.1scaffold_88.1	421155	1.32546e-23
5858031	1		103.837	0.831771	-0.079996	228	0.0146403		TGCAGGAACCCGTCCACCGCCTTTCTGTAAAAAATCAATCAAAGTTTAC	5858031	1.23513e-19	LFQT01004661.1_Scaffold00007	938250	6.07923e-18		0	999		0	999		0	0	999	LFLV01000224.1scaffold_310.1	45425	2.66725e-18
5844619	1		103.837	0.836517	-0.0775252	228	0.0138142		TGCAGTCCTGGTCGAAAGCAGTATAATCGTGGAGAGTAGATAACTATTTTTAC	5844619	8.39926e-22	LFQT01004661.1_Scaffold00007	1547181	1.97196e-18		0	999		0	999		0	0	999	LFLV01002129.1scaffold_779.1	79756	6.65015e-20
5858088|F|0--7:A>G	1		103.837	0.840706	-0.075356	228	0.0131059		TGCAGGAACATGATCTGAATCCCCAGGAGGTTAC	5858088	1.41938e-11		0	999		0	999		0	999		0	0	999		0	999
5844348	1		103.837	0.844745	-0.0732744	228	0.0124411		TGCAGTAAACACACTAGAGGAAGCATCTGCCATGAAGTCGTTGTGCTCAGTGAATTAC	5844348	1.60704e-24		0	999		0	999		0	999		0	0	999		0	999
5856080|F|0--24:T>C	1		103.837	0.851079	-0.0700299	228	0.0114348		TGCAGTCCCCTCTTGAATATCTTCTTTGCTGTATCTTCTCGAAGGACCTCTCATAACAGTATATTACAG	5856080	1.52834e-30	LFQT01004128.1_Scaffold00113	39479	8.55507e-24	C2	27452653	2.08025e-22	NC_027749.1_chromosome_C2	27452653	2.08167e-22	chrCnn_random	11088284	2	1.64947e-20	CM004491.1_chromosome_B1	5636755	3.68528e-24
5864948	1		103.837	0.855066	-0.0680001	228	0.0108239		TGCAGCTGGACAAGATAGGGACAGCACCAAACAGCTCTTTTCCTTAC	5864948	1.48755e-18		0	999		0	999		0	999		0	0	999		0	999
5839847	1		103.837	0.857547	-0.0667422	228	0.0104526		TGCAGATACTCAAGATCACACCAATGGAGAGAAGCTTTTTCAGCAGCAGCTGGTTATGAGTTAC	5839847	8.59634e-28		0	999		0	999		0	999		0	0	999		0	999
5857747|F|0--21:G>A	1		103.837	0.857658	-0.0666858	228	0.0104361		TGCAGCGAATTCACGTGATCCGAGTTCAAGAAAATCAGATTATTTTAC	5857747	4.28913e-19	CM007194.1_chromosome_A10	4601250	3.68477e-10		0	999		0	999		0	0	999		0	999
5846549	1		103.837	0.860501	-0.0652485	228	0.010019		TGCAGCCTCTTGATTGATTCCACTGGAAACCATCTTTTTTAC	5846549	7.29484e-16		0	999		0	999		0	999		0	0	999		0	999
5830591	1		103.837	0.868684	-0.0611382	228	0.00886758		TGCAGACGAGACATCATGAGCCTATCGATCTGATCTCGTAACCCGCTCTCGAGAAAGTCTGTCACTGTT	5830591	1.52834e-30	LFQT01006521.1_Scaffold00106	109180	8.49476e-29		0	999		0	999	chrAnn_random	12249205	1	5.93254e-20	LFLV01000514.1scaffold_195.1	116234	7.921e-26
14781761|F|0--41:A>T	1		103.837	0.880705	-0.0551696	228	0.00730661		TGCAGCCTTAGGAGAAAACATTGAAGAATCAAAGCTAGTGAAATTTTTTCTTAC	14781761	2.40607e-22	LFQT01009609.1_Scaffold00263	31025	9.50231e-17		0	999		0	999		0	0	999	CM004494.1_chromosome_B4	13021491	1.91275e-20
5865804|F|0--8:G>A	1		103.837	0.886028	-0.0525526	228	0.00666471		TGCAGTAAGCATCTTACCCAAGGTGATGACAGACCATCTAGGTCTGAAGATAGAGCCTTCGGACGATTA	5865804	1.52834e-30	LFQT01005072.1_Scaffold00203	81592	3.95223e-27	C9	29555479	9.74717e-16	NC_027756.1_chromosome_C9	29555479	9.75382e-16	chrC08_random	768432	10	1.66118e-15	CM004498.1_chromosome_B8	215325	1.70251e-27
5837632	1		103.837	0.906959	-0.0424122	228	0.00443128		TGCAGTGAACAGAGGTTAGTTTCATTCAGCAAAAGAGAGACACAAGATTTTGACACGAAACTATAAATT	5837632	1.52834e-30	CM007198.1_chromosome_B4	27381378	8.49476e-29		0	999		0	999		0	0	999	CM004491.1_chromosome_B1	22412843	3.6593e-29
5857501|F|0--13:C>A	1		103.837	0.917114	-0.0375767	228	0.00351345		TGCAGCACAGCAGCATGAGTCTTATAAAAATGATTATAAGATTTAC	5857501	5.15204e-18	CM007199.1_chromosome_B5	20554662	4.33853e-14		0	999		0	999		0	0	999	LFLV01000403.1scaffold_287.1	82945	1.91044e-14
5832065	1		103.837	0.919532	-0.0364333	228	0.00331078		TGCAGCATGAAGTACTGCGTATCCCCAGGCCGTGGTTGGGAGATTACTTTTCATGAGTAAGGATCTAGC	5832065	1.52834e-30		0	999		0	999		0	999		0	0	999	LFLV01000383.1scaffold_215.1	323272	1.32546e-23
5865630|F|0--63:G>T	1		103.837	0.919753	-0.0363288	228	0.00329253		TGCAGATCATACTCATCTTTCCATCAAAATCAGCGATCAATCTTCGATTTCCCGTAAAAGCTTGATTTA	5865632	7.11069e-29	LFQT01004294.1_Scaffold00156	35676	8.49476e-29		0	999		0	999		0	0	999	CM004493.1_chromosome_B3	21076049	3.6593e-29
5837414	1		103.837	0.921059	-0.0357123	228	0.00318584		TGCAGGAAGATAATATGGTCAGTGGGGATACTAGAGAAGGTGATATTGCGTTGGAGACGGAAAGGAGCT	5837414	1.52834e-30	CM007199.1_chromosome_B5	8027478	1.09887e-27	C4	40421256	1.24316e-24	NC_027751.1_chromosome_C4	40421256	1.24401e-24	chrC04	36206484	3	2.11868e-24	CM004497.1_chromosome_B7	20336246	4.73361e-28
5846801	1		103.837	0.925561	-0.0335948	228	0.00283179		TGCAGTTTTTCCTAACCTGATAACCTCTCACATGAGCCTGCACGTTGCCAGTTTAC	5846801	1.96942e-23	CM007199.1_chromosome_B5	8027420	1.68775e-19		0	999		0	999		0	0	999	CM004495.1_chromosome_B5	23282024	7.3381e-20
5856080	1		103.837	0.936519	-0.0284836	228	0.00205783		TGCAGTCCCCTCTTGAATATCTTCTTTGCTGTATCTTCTCGAAGGACCTCTCATAACAGTATATTACAG	5856080	1.52834e-30	LFQT01004128.1_Scaffold00113	39479	8.55507e-24	C2	27452653	2.08025e-22	NC_027749.1_chromosome_C2	27452653	2.08167e-22	chrCnn_random	11088284	2	1.64947e-20	CM004491.1_chromosome_B1	5636755	3.68528e-24
5856974|F|0--19:G>C	1		103.837	0.936927	-0.0282944	228	0.00203142		TGCAGACTTGCAGTACACTGCTAGATTTAC	5856974	1.74175e-09	LFQT01004661.1_Scaffold00007	827039	2.32639e-07		0	999		0	999		0	0	999		0	999
5846554	1		103.837	0.941792	-0.0260449	228	0.00172955		TGCAGCGATGGTTTATAACCTGTCTGAACCAATTGGCCTCTCTTTGGGCTGGTTAC	5846554	1.96942e-23	CM007199.1_chromosome_B5	38610633	3.62758e-21		0	999		0	999		0	0	999	LFLV01001204.1scaffold_82.1	770797	1.57722e-21
5853371|F|0--40:T>A	1		103.837	0.943864	-0.0250905	228	0.00160841		TGCAGGAACTCCTCTCTTTTAGATGCTCGGATCAGGATGCTCATAATCTGTTGCAGCCAGTAACGCAGG	5853371	1.52834e-30	CM007198.1_chromosome_B4	24892506	3.95223e-27		0	999		0	999		0	0	999	LFLV01002393.1scaffold_67.1	887847	1.70251e-27
5858544|F|0--9:G>T	1	B01	103.837	0.943864	-0.0250905	228	0.00160841		TGCAGTCCGGTATGCACAAGCGCAATCCCTTAC	5858544	4.76465e-11	CM007195.1_chromosome_B1	29917809	7.14322e-09		0	999		0	999		0	0	999	LFLV01000725.1scaffold_1031.1	54910	3.00867e-09
14790723|F|0--33:T>G	1		103.837	0.947995	-0.023194	228	0.00138009		TGCAGCTGACTGAACCAGCTAACTGCATCTCCATATAGAGAATAGGGGAAGATCTTGCAGATAATATGG	14790723	1.52834e-30	LFQT01004294.1_Scaffold00156	172303	3.95223e-27	C7	10365073	4.47121e-24	NC_027754.1_chromosome_C7	10365073	4.47425e-24	chrC04_random	2212499	12	7.62012e-24	CM004493.1_chromosome_B3	21199119	1.70251e-27
14792439	1		103.837	0.962312	-0.0166839	228	0.000724297		TGCAGCCGAGCCGAAGTCGCCGAGCTCCAGCCCCTCGACTGTGAACCGCTTAC	14792439	8.39926e-22		0	999		0	999		0	999		0	0	999	LFLV01001848.1scaffold_173.1	2014	6.69737e-15
5859035	1		103.837	0.96663	-0.0147395	228	0.000567741		TGCAGAAAAGCCTTGAGCAAGTGGAGGAGAGAACATAATTTTAC	5859035	6.15192e-17		0	999		0	999		0	999		0	0	999		0	999
14771868	1		103.837	0.967541	-0.0143304	228	0.000537147		TGCAGCCATGGCTTCTCCTGCACAGCAGCTCATCTGCTTCCAACCAGAACCTGGCTTTAC	14771868	1.3077e-25		0	999		0	999		0	999		0	0	999	LFLV01002393.1scaffold_67.1	216276	1.06037e-23
14788291	1		103.837	0.971931	-0.0123646	228	0.000401637		TGCAGGTTCATTCGGGATTTCTGCATCTGGATTTCTCGATGTTAC	14788291	1.78173e-17	LFQT01000611.1_Scaffold00346	314	5.35715e-13		0	999		0	999		0	0	999		0	999
5865835|F|0--59:A>C	1		103.837	0.973234	-0.0117829	228	0.000365207		TGCAGCCTCATAGTGGATGGAGGGAGTTGTGTGAATGTGGCCAGTGAGACCATGGTGAGAAAATTAGGA	5865835	1.52834e-30	LFQT01008332.1_Scaffold03080	543	3.98029e-22		0	999		0	999		0	0	999	LFLV01001113.1scaffold_2065.1	10422	3.68528e-24
5864493	1		103.837	0.9734	-0.0117086	228	0.000360672		TGCAGCGACCACACTTGAGGTCAGATAAATGAAGCTGTTGATTCGAAGACTTCTAATAGCATTTGTGGT	5864493	1.52834e-30		0	999		0	999		0	999		0	0	999		0	999
5859800|F|0--26:C>T	1		103.837	0.979866	-0.00883326	228	0.000206605		TGCAGAGTGTTATCAAGATGGAGGAGCTATAATAACACGAACTCAAGGAAGGTGATTGAGCCAATTACA	5859800	7.11069e-29	CM007197.1_chromosome_B3	17367075	5.11253e-26		0	999		0	999		0	0	999	LFLV01001209.1scaffold_586.1	98616	2.20233e-26
5853231	1		103.837	0.989994	-0.00436762	228	5.1e-05		TGCAGCTTGAGGAGCCTTTGACTGACGTCTTATTTGCCAGCACTTTACCTGCAAACCAAAATATCATTG	5853231	1.52834e-30	LFQT01006521.1_Scaffold00106	209912	8.49476e-29	C8	13099013	3.45645e-25	NC_027755.1_chromosome_C8	13099013	3.45881e-25	chrA08	5248900	4	1.26613e-26	LFLV01000514.1scaffold_195.1	203752	1.02465e-24
5866153|F|0--37:G>A	1		103.837	0.996456	-0.00154168	228	6.4e-06		TGCAGGCTTCTGCATAAATGTAGCAATCTTGCTTCTTGGCTCCTCTGCACGTGCCTCATCAAATAAATT	5866153	1.52834e-30	LFQT01004661.1_Scaffold00007	1680603	8.49476e-29		0	999		0	999		0	0	999	LFLV01002129.1scaffold_779.1	8371	1.70251e-27
5838026	1		104.173	0.547285	-0.261787	228	0.117591		TGCAGCTTCTTTCTAAATAAGCAGCAGTCGTTCACACAAGTGTGGGAACCGAAATTCACACCGTCAATT	5838026	1.52834e-30		0	999		0	999		0	999		0	0	999		0	999
5853914|F|0--56:G>A	1	B01	104.173	0.556587	-0.254467	228	0.112213		TGCAGGGAGGTTAGCAAAGATTGAAGAGGACTAGGCGTTGGCTGATAATTCTTCAAGATCATCAGATGG	5853914	1.52834e-30	CM007195.1_chromosome_B1	30803081	1.83879e-25		0	999		0	999		0	0	999		0	999
5854092	1	B01	104.173	0.593585	-0.226517	228	0.0924394		TGCAGGTACATACGACTGATAGTTGTAGAATCCCTGCGTCTCTATCCTCAGCCGCCGCTGCTCATCAGA	5854092	1.52834e-30	CM007195.1_chromosome_B1	32255400	8.55507e-24		0	999		0	999		0	0	999	CM004491.1_chromosome_B1	4747086	3.6593e-29
5834403	1	B01	104.173	0.610945	-0.213998	228	0.0840019		TGCAGTGACGTTGGAATTGGAGAATCTATGTGATAATTTTTAGCGACTGATGAAAGAAATAGTGAAAAT	5834403	1.52834e-30	CM007195.1_chromosome_B1	30913978	3.95223e-27		0	999		0	999		0	0	999	CM004491.1_chromosome_B1	10150078	1.70251e-27
5853914	1	B01	104.173	0.753298	-0.123033	228	0.032051		TGCAGGGAGGTTAGCAAAGATTGAAGAGGACTAGGCGTTGGCTGATAATTCTTCAAGATCATCAGATGG	5853914	1.52834e-30	CM007195.1_chromosome_B1	30803081	1.83879e-25		0	999		0	999		0	0	999		0	999
5854002|F|0--38:G>A	1		104.173	0.855673	-0.0676923	228	0.0107325		TGCAGGGGTAGAAGGAACTACACAAAATTTCTTACAAAGCTACAGAAGTAATGTTCTCAAGCTATCAAA	5854002	1.52834e-30	LFQT01006488.1_Scaffold00017	932693	3.95223e-27		0	999		0	999		0	0	999	LFLV01000357.1scaffold_478.1	143081	1.70251e-27
5854093	1	B01	104.173	0.916332	-0.0379471	228	0.00358029		TGCAGGTACATACGACTGGTAGTTGTAGAATCCCTGCGTCTCTATCCTCAGCCGCCTCTTCTCATCAGA	5854093	1.52834e-30	CM007195.1_chromosome_B1	32255400	3.95223e-27		0	999		0	999		0	0	999	CM004491.1_chromosome_B1	4747086	3.68528e-24
5853062|F|0--24:A>G	1		104.173	0.938854	-0.0274021	228	0.00190894		TGCAGCTGCGAGACATCCATTCCCATGTAGTCTTCAGGCTGATATTGGAGGAATTCTCGGGAAAAACTC	5853062	1.52834e-30	CM007198.1_chromosome_B4	24892572	8.49476e-29		0	999		0	999		0	0	999	LFLV01002393.1scaffold_67.1	887781	3.6593e-29
5854092|F|0--18:A>G	1	B01	104.173	0.97868	-0.00935922	228	0.000231668		TGCAGGTACATACGACTGATAGTTGTAGAATCCCTGCGTCTCTATCCTCAGCCGCCGCTGCTCATCAGA	5854092	1.52834e-30	CM007195.1_chromosome_B1	32255400	8.55507e-24		0	999		0	999		0	0	999	CM004491.1_chromosome_B1	4747086	3.6593e-29
5860258|F|0--6:C>G	1		104.173	0.352435	-0.452921	228	0.281033		TGCAGCCAAAACATCCAGTATCTGGTGGTTGTCAAAGCGGACAATTTTTCTTACGGTGTCCTGGCTGCT	5860258	1.52834e-30	LFQT01004661.1_Scaffold00007	1751413	3.95223e-27		0	999		0	999		0	0	999	LFLV01001450.1scaffold_2255.1	5174	1.32546e-23
5846690	1		104.174	0.730673	-0.136277	228	0.0384491		TGCAGTAGCTTTAGTTGCTGGGAGTTGATTAC	5846690	1.59127e-10	CM007190.1_chromosome_A6	34791131	2.31224e-08		0	999		0	999		0	0	999		0	999
5845258	1		104.51	0.791351	-0.101631	228	0.022708		TGCAGAAAAGAAAAAAAAAAGATAAAAACTTTAC		999		0	999		0	999		0	999		0	0	999		0	999
5865497	1		104.51	0.793412	-0.100501	228	0.0222512		TGCAGCAAACAAATAACATTATTACTCTGCGTATGGTTTATTAC	5865497	6.15192e-17	LFQT01004128.1_Scaffold00113	170121	1.09661e-14		0	999		0	999		0	0	999	CM004491.1_chromosome_B1	5518877	4.84985e-15
5845513	1		104.516	0.416528	-0.380356	228	0.214443		TGCAGATACTCAAGATCACACCAACTCTTAC	5845513	5.28297e-10	LFQT01001450.1_Scaffold01666	3437	7.39227e-08		0	999		0	999		0	0	999	CM004492.1_chromosome_B2	25863718	3.50279e-08
5857785	1		104.849	0.262759	-0.580442	228	0.407976		TGCAGCGGGTCAAATGGGGCGAGGCCCGCGGGTTAC	5857785	1.24354e-12		0	999		0	999		0	999		0	0	999		0	999
5865767	1		104.849	0.733993	-0.134308	228	0.0374697		TGCAGATAAATGTGAATGTTCGAGGATAGCAACGAAGATCGACGAAAAATGGAATATTTCCAAAAGAGA	5865767	1.52834e-30	LFQT01007236.1_Scaffold00536	38444	1.42147e-26	C4	16284151	4.53492e-14	NC_027751.1_chromosome_C4	16284151	4.53801e-14	chrC01	26309249	3	1.66118e-15	CM004491.1_chromosome_B1	6330412	6.12331e-27
5831478	1		104.849	0.835124	-0.0782488	228	0.014054		TGCAGATTCAGAGGCGAATCTTTTCATACCCCCGGAGACCTGATGCAGCGCATCTTTAGCGTCAAGTTG	5831478	1.52834e-30		0	999	C1	36923658	4.56711e-09	NC_027748.1_chromosome_C1	36923658	4.57023e-09		0	0	999		0	999
5862268	1		104.851	0.932652	-0.0302805	228	0.00231679		TGCAGCCACTACTCGAGCTGCAGAAGAAGCCAACACTACAAGAATACATGTCTTTAC	5862268	5.62783e-24	LFQT01007196.1_Scaffold00151	377	2.25367e-18		0	999		0	999		0	0	999	LFLV01002430.1scaffold_838.1	24869	9.78907e-19
5849766|F|0--11:C>T	1		104.853	0.981318	-0.00819022	228	0.000177877		TGCAGAACTGTCTCCGCCACTAGCGATCCTAATCGTTATCAACAGCGCTGCTAACTTATACCGTAAACA	5849766	1.52834e-30	LFQT01006556.1_Scaffold00181	31266	8.49476e-29		0	999		0	999		0	0	999	CM004491.1_chromosome_B1	2321187	3.6593e-29
14757082	1		105.183	0.520584	-0.283509	228	0.134012		TGCAGATGGAAGCCATGATGTCTGAGATCCTGCTCCTACTAACTTGAACCTGATGATCCTGCTCCTACT	14757082	1.52834e-30		0	999		0	999		0	999		0	0	999		0	999
5848365	1		105.191	0.769118	-0.114007	228	0.0279549		TGCAGGGCTGTTCGTTTTTCTTATTAC		999		0	999		0	999		0	999		0	0	999		0	999
19818910	1		105.196	0.883483	-0.053802	228	0.00696789		TGCAGCGGGCTTTTGCAATCCCTCGCGGGGCCTTGCTCTTGGCCTTCGCAGTTAC	19818910	6.88654e-23	LFQT01009609.1_Scaffold00263	22743	1.26262e-20		0	999		0	999		0	0	999	CM004496.1_chromosome_B6	6685961	9.26108e-14
5835732	1		105.196	0.893347	-0.0489797	228	0.00583115		TGCAGATTGCTGATTTATCTTCTCTGTTGTCTTCAAGAAAACTAATGTCTGAGATGGGTTTTCGAGTTG	5835732	1.52834e-30	LFQT01004661.1_Scaffold00007	1821728	8.49476e-29		0	999		0	999	chrC08	4979277	2	7.67422e-19	LFLV01002489.1scaffold_996.1	21741	3.6593e-29
5858868|F|0--13:G>A	1		105.52	0.202434	-0.693717	228	0.528956		TGCAGTTTTCTCAGGATACCAAACTGTCTATATATCCAACTTTTCGTTTTGGTTAC	5858868	1.96942e-23	LFQT01009689.1_Scaffold00082	119708	1.68775e-19		0	999		0	999		0	0	999	LFLV01000774.1scaffold_349.1	129075	7.3381e-20
5853256|F|0--10:G>A	1		105.525	0.383521	-0.416211	228	0.246756		TGCAGCTTGTGTACCGTGGATAGGAATATGTCGTATCTCAATCTTTTTCTATTTCCATTACAAATCACG	5853256	1.52834e-30	CM007196.1_chromosome_B2	19202574	3.95223e-27		0	999		0	999		0	0	999	LFLV01001881.1scaffold_234.1	64690	1.70251e-27
5865092	1		105.526	0.785651	-0.104771	228	0.0239974		TGCAGGGGTCAAGACTGCCACGTTCACCCTGTCAACCAAAAAGCAATCCGAAAACTGGGCAGCTACCTT	5865092	1.52834e-30	LFQT01004661.1_Scaffold00007	1385760	8.49476e-29		0	999		0	999		0	0	999		0	999
5843883	1		105.526	0.820348	-0.086002	228	0.0167321		TGCAGGAGTTATACAGAAGCTCATCTTTCAAAACTTAC	5843883	1.07441e-13	CM007198.1_chromosome_B4	8084910	1.66163e-11		0	999		0	999	chrAnn_random	36559953	3	1.48002e-11	LFLV01001456.1scaffold_316.1	7326	7.49863e-12
5841619	1		105.53	0.469628	-0.328246	228	0.169807		TGCAGAACATTTCTTATTGGTTGTTTGTTCTAAGTTCCAAGTCTCGATTCAACTTAC	5841619	5.62783e-24	LFQT01006677.1_Scaffold00176	141278	1.04114e-21		0	999		0	999		0	0	999	CM004491.1_chromosome_B1	5222969	4.5223e-22
5842483	1		105.53	0.708664	-0.14956	228	0.0453044		TGCAGATCAAGGAGCCAGTTGATATTAGAAATTCCTCATAATTAC	5842483	1.78173e-17		0	999		0	999		0	999		0	0	999		0	999
5842122	1		105.53	0.894251	-0.0485404	228	0.00573213		TGCAGAGACGACACAAGAAGAATGGGTTTTTAC	5842122	4.76465e-11		0	999		0	999		0	999		0	0	999		0	999
5866023	1		105.858	0.409532	-0.387713	228	0.220973		TGCAGAGACTACACTCAGGAGTACAAAATAAAGCTTGCTCCAACTGAGTTTAC	5866023	8.39926e-22	LFQT01005606.1_Scaffold00245	76099	7.09244e-18		0	999		0	999		0	0	999	CM004495.1_chromosome_B5	18310304	3.09402e-18
5836655	1		105.858	0.87485	-0.0580665	228	0.00804758		TGCAGTCGGTTTAGCATTTCTACTTACAAAAAAAGAAATCAATTCAAAATAATTCTCGATTAC	5836655	3.02152e-27	CM007198.1_chromosome_B4	25127070	5.71164e-25		0	999		0	999		0	0	999	LFLV01002393.1scaffold_67.1	671157	2.46904e-25
19818899	1		105.874	0.681177	-0.16674	228	0.0547797		TGCAGGCTATTGCATAGTCTGCATTTGCTAGCATCTTTTGGTAGGCTGGATCATCACGTTGCTTGTAGA	19818899	1.52834e-30	CM007199.1_chromosome_B5	23551951	8.49476e-29		0	999		0	999		0	0	999	LFLV01001895.1scaffold_679.1	97974	3.6593e-29
5865512	1		106.877	0.755432	-0.121804	228	0.0314804		TGCAGTATCCCTTCAACGTAGTGTGCTTCTGGATTGCCACTGGACAGTGCTTTAC	5865512	6.88654e-23	CM007199.1_chromosome_B5	14037648	2.7331e-17		0	999		0	999		0	0	999	CM004497.1_chromosome_B7	17646480	1.18955e-17
5857478	1		106.877	0.786227	-0.104452	228	0.0238654		TGCAGCAATACTTCAGTTATGATTTCATCAACTTAC	5857478	1.24354e-12	LFQT01009609.1_Scaffold00263	35135	1.84238e-10	Scaffold01390	831	4.74569e-09	NW_013617927.1_UnpScaffold01390	831	4.74892e-09	chrC04	38453411	1	7.63492e-09	CM004494.1_chromosome_B4	13018689	8.40674e-11
14793489|F|0--13:A>G	1		107.545	0.706845	-0.150676	228	0.0458997		TGCAGCGACCGATAGTAACTCTTTTCCATCGATCGACACTTAC	14793489	2.12043e-16	CM007202.1_chromosome_B8	41584899	4.84694e-13	C7	6848668	9.37793e-13	NC_027754.1_chromosome_C7	6848668	9.38433e-13	chrAnn_random	11617084	11	1.55274e-12	CM004496.1_chromosome_B6	551047	7.72906e-13
14793489	1		107.545	0.760994	-0.118619	228	0.0300201		TGCAGCGACCGATAGTAACTCTTTTCCATCGATCGACACTTAC	14793489	2.12043e-16	CM007202.1_chromosome_B8	41584899	4.84694e-13	C7	6848668	9.37793e-13	NC_027754.1_chromosome_C7	6848668	9.38433e-13	chrAnn_random	11617084	11	1.55274e-12	CM004496.1_chromosome_B6	551047	7.72906e-13
5836948	1		107.57	0.550656	-0.25912	228	0.115622		TGCAGAAACCAAACAACTTTTCGTATCTGAGAGACACCATAATCTCCACCCCTTCCACAAATTCAACTG	5836948	1.52834e-30		0	999		0	999		0	999		0	0	999		0	999
5858111	1		108.555	0.564912	-0.248019	228	0.107541		TGCAGGATCGGCATCCATCCTTTGGTGTTCGTTCGGATTCGTGGTTAC	5858111	4.28913e-19	LFQT01005512.1_Scaffold00125	150434	1.70227e-13		0	999		0	999		0	0	999	LFLV01000996.1scaffold_352.1	167817	7.16987e-14
14791402|F|0--9:C>T	1		108.555	0.616346	-0.210176	228	0.0814804		TGCAGTCGCCAGATTCATCTAGAAATGGAGATTTAGTGACCAAGTCTATTGAGGATGATTATTAC	14791402	2.44442e-28	LFQT01007535.1_Scaffold02163	6578	2.16239e-24		0	999		0	999		0	0	999	CM004491.1_chromosome_B1	11844490	4.34346e-23
5864554	1		108.555	0.755918	-0.121525	228	0.0313514		TGCAGCGCATCGATCCCAATCCCTCCATTATGAGTTCTCACTAACTCCATAATTAC	5864554	1.96942e-23	LFQT01002803.1_Scaffold00355	99530	3.62758e-21	C3	64472441	8.96623e-15	NC_027750.1_chromosome_C3	64472441	8.97235e-15	chrCnn_random	34098189	14	3.25408e-16	CM004496.1_chromosome_B6	3363400	1.57722e-21
14791399	1		108.555	0.77315	-0.111736	228	0.0269596		TGCAGTCTCTAGATTCATCTAGAAATGGAGATTTAGTGACCAAGTCTATTGAGGATGATTATTAC	14791399	2.44442e-28	LFQT01007535.1_Scaffold02163	6578	2.16239e-24		0	999		0	999		0	0	999	CM004491.1_chromosome_B1	11844490	4.34346e-23
5865424	1		108.893	0.599315	-0.222345	228	0.0895974		TGCAGCCAAGATCTCTAACCTGTTGGGAGGACATAAAAGGCGCCTTCCTAGGTAAATTTTTCAGCAGAG	5865424	1.52834e-30	CM007197.1_chromosome_B3	81834036	3.95223e-27		0	999		0	999	chrAnn_random	22349754	1	5.93254e-20	CM004498.1_chromosome_B8	26336323	2.20233e-26
5846288	1		109.568	0.362968	-0.440132	228	0.268962		TGCAGAAAAGTTGAAACGATTGACTTGTGGTTTAC	5846288	4.20948e-12		0	999		0	999		0	999		0	0	999		0	999
5858117	1		109.568	0.58048	-0.236212	228	0.0991563		TGCAGGATTCAAGTGGTTTTGGAGAGTTTAC	5858117	5.28297e-10		0	999		0	999		0	999		0	0	999		0	999
5865547	1		109.976	0.454126	-0.342824	228	0.181995		TGCAGCTTTCCTTGGAAAGGAACAGATAAATGAGGTACAAGCTACGCTTGACAATGTTAC	5865547	1.3077e-25	LFQT01004509.1_Scaffold00123	167801	1.90553e-19		0	999		0	999		0	0	999	CM004494.1_chromosome_B4	2697997	8.25536e-20
5865142|F|0--19:G>T	1		110.579	0.319983	-0.494873	228	0.321536		TGCAGGCTATTTTGGATATGCGTCAACATTTCTCACATCTTTTAC	5865142	1.78173e-17	LFQT01003675.1_Scaffold00210	53110	3.20144e-15		0	999		0	999		0	0	999	CM004491.1_chromosome_B1	3310395	1.41265e-15
14793070	1		110.579	0.907168	-0.0423121	228	0.00441128		TGCAGGCTATTTTGGATATTCGTCAACATTTCTCACATCCTTTAC	14793070	1.78173e-17		0	999		0	999		0	999		0	0	999		0	999
14774706	1		111.592	0.708762	-0.149499	228	0.0452724		TGCAGTCGCCAGATTCATCTAGAAATGGAGATTTAC	14774706	1.24354e-12		0	999		0	999		0	999		0	0	999	CM004491.1_chromosome_B1	11844519	1.08748e-09
5847985	1		111.592	0.742755	-0.129154	228	0.0349521		TGCAGGAGCTTTATTATGAGTTTTTCCTTACATGCTGTGTTTTAC	5847985	1.78173e-17	LFQT01003382.1_Scaffold02636	6601	3.22417e-10		0	999		0	999		0	0	999	LFLV01001631.1scaffold_780.1	46142	1.42268e-10
5866382	1		111.93	0.627141	-0.202635	228	0.0765834		TGCAGGTCCGGATACTTGTTTGAGCTGCCATGCACCTTTTGATCGATACCCCCAAGGTAAAGCCTGCAC	5866382	1.52834e-30	LFQT01005931.1_Scaffold00317	60419	1.85185e-20	C9	25209599	4.53492e-14	NC_027756.1_chromosome_C9	25209599	4.53801e-14	chrC08_random	613025	14	1.66118e-15	LFLV01000981.1scaffold_648.1	120227	7.97723e-21
5858456|F|0--26:A>T	1		111.93	0.628769	-0.201509	228	0.0758614		TGCAGTATACGAAGAAAGAAGGAGGGATCGGATTTAC	5858456	3.6609e-13	LFQT01006488.1_Scaffold00017	1059161	5.54939e-11		0	999		0	999		0	0	999	LFLV01000357.1scaffold_478.1	31003	2.51719e-11
14792673	1		111.93	0.655598	-0.183363	228	0.0645556		TGCAGCATTTGGACCCGGATCGCGAGATGCCCACGCCCAACCTTGGATCTCTCTTTGCCCAGAACCTGG	14792673	1.52834e-30	CM007196.1_chromosome_B2	8458985	3.95223e-27		0	999		0	999		0	0	999	CM004491.1_chromosome_B1	2222584	1.70251e-27
5866162	1		111.93	0.739998	-0.13077	228	0.0357339		TGCAGCGTTCCTTGGAAAGGAACATATAAATGAAGTACAAGCTACACTTGACAATGTTCAGAAACTGCT	5866162	1.97704e-29	LFQT01000364.1_Scaffold01418	8909	1.83879e-25		0	999		0	999		0	0	999	CM004498.1_chromosome_B8	1235555	1.70251e-27
5865794|F|0--16:A>G	1		111.93	0.912361	-0.0398333	228	0.00392963		TGCAGCATTTGGACCCAGATCACGAGATTCCCACGCCCAACCTTGTATCTCTCTTTGCCCAGCACCTGG	5865794	1.52834e-30	LFQT01004294.1_Scaffold00156	6450	8.49476e-29		0	999		0	999		0	0	999	CM004493.1_chromosome_B3	21053874	3.6593e-29
5864944	1		111.93	0.919816	-0.0362991	228	0.00328735		TGCAGCTTTCCCTGCGAGACATCCATTCGAAGATCCATCACGTTAC	5864944	5.15204e-18	LFQT01006572.1_Scaffold00612	12553	4.33853e-14		0	999		0	999		0	0	999	LFLV01001848.1scaffold_173.1	252940	1.91044e-14
5865959	1		111.93	0.999319	-0.000295841	228	2.36e-07		TGCAGGTTCATTCGGGATTTCCGCATCTGGGTTTCTCGATGTTGGCTTCCTTTTGTGAATCGTATGTTT	5865959	1.52834e-30	LFQT01004873.1_Scaffold00746	1901	1.83879e-25		0	999		0	999		0	0	999	LFLV01002449.1scaffold_539.1	88374	7.921e-26
5860899|F|0--13:T>A	1		113.613	0.342537	-0.465292	228	0.292835		TGCAGGAGGCAGATTATGGCTTCTGCGGAGACCGAATTTATCAGTGGTGGTGTACCTGAAGACGGATCA	5860899	1.52834e-30	LFQT01006938.1_Scaffold00111	90324	8.49476e-29		0	999		0	999		0	0	999	CM004491.1_chromosome_B1	8875127	3.6593e-29
5860898	1		113.613	0.343402	-0.464198	228	0.291787		TGCAGGAGGCAGAATATGGCTTCTGTGGAGACCGAATTTATCAGTGGTTGTGTACCTGAAGACGGATCA	5860898	1.52834e-30		0	999		0	999		0	999		0	0	999		0	999
5858277|F|0--22:A>G	2		0	0.308497	-0.51075	228	0.337205		TGCAGGTAGTATATACTGATGGAGAGTCAGAACAGCTTAC	5858277	8.57861e-15		0	999		0	999		0	999		0	0	999	CM004494.1_chromosome_B4	32606305	6.5697e-13
5855744|F|0--22:C>T	2		0.673401	0.46703	-0.330655	228	0.171805		TGCAGCTCCGACTACCATTGATCTTTCAATCGAGCAAGACGATGACGACGACGACGAAGAGATATCAAA	5855744	1.52834e-30	CM007202.1_chromosome_B8	20239218	2.39552e-19		0	999		0	999		0	0	999		0	999
5863867|F|0--10:T>C	2		0.673401	0.622344	-0.205969	228	0.0787362		TGCAGCGAGATCAAACCACAGTTTTTTAC	5863867	5.69496e-09	CM007198.1_chromosome_B4	27747977	7.17188e-07		0	999		0	999		0	0	999		0	999
5846076	2		0.673401	0.692474	-0.159597	228	0.0507596		TGCAGTCAACAGACATCATCAACAGCTTCCTGAGATTGTTAC	5846076	7.29484e-16	CM007198.1_chromosome_B4	27976671	5.93992e-12		0	999		0	999		0	0	999	CM004494.1_chromosome_B4	32359432	5.67618e-14
5855745	2		0.673401	0.922863	-0.034863	228	0.00304151		TGCAGCTCCGACTACCATTGATTTTTCAATCGAGCAAGACGATGACGATGACGACGAAGAGATATCAAA	5855745	1.52834e-30	CM007202.1_chromosome_B8	20239218	5.14883e-21		0	999		0	999		0	0	999	CM004494.1_chromosome_B4	32479712	3.6593e-29
5858740|F|0--11:A>G	2		1.0101	0.593241	-0.226769	228	0.0926121		TGCAGTTCAGAACTTGGATTTTTTCAGCGTTTTAC	5858740	4.20948e-12	LFQT01008051.1_Scaffold00127	85715	6.07419e-10	C6	217248	3.38644e-10	NC_027753.1_chromosome_C6	39605194	3.38875e-10	chrC06	37012522	2	5.90216e-10	CM004494.1_chromosome_B4	32655676	2.79102e-10
5833610	2		1.0101	0.666064	-0.176484	228	0.0604405		TGCAGGTAAGTAACACACCCCATGTGAATATGTTTGTTTGCACTTATACCTGGACTGTTGTTATGCACT	5833610	1.52834e-30	LFQT01008051.1_Scaffold00127	121352	8.49476e-29		0	999		0	999		0	0	999		0	999
5862765|F|0--30:G>T	2		2.6936	0.830768	-0.0805203	228	0.0148182		TGCAGAAAAGTATGGTGATAAAGTTGCACTGGTAGATCCTTACCATGATCCGCCTTTGAAATTGACATA	5862765	1.52834e-30	CM007198.1_chromosome_B4	28288325	1.83879e-25		0	999		0	999	chrA04	4860987	1	1.63784e-25	CM004494.1_chromosome_B4	32127501	3.6593e-29
5840058	2		4.37711	0.537776	-0.269399	228	0.123269		TGCAGTTTGCAGACACTATAAGATGTCTTTGCAGATATAGTGTTCAGTGCTCATGCATTTGTTGTTTTG	5840058	1.52834e-30		0	999		0	999		0	999		0	0	999		0	999
5845829	2		4.37711	0.923308	-0.0346534	228	0.00300637		TGCAGCTTTTTCTTGATTCAACCTACACAATTAC	5845829	1.41938e-11	CM007198.1_chromosome_B4	27362401	1.98606e-09		0	999		0	999		0	0	999		0	999
5833256	2		5.39631	0.704317	-0.152232	228	0.0467341		TGCAGGATATACACGTCAAGCTATAAGAGCCACAAGACAGCAAAGTGCAAGCTATTGCAGTTTAC	5833256	2.44442e-28	CM007198.1_chromosome_B4	27685464	2.16239e-24		0	999		0	999		0	0	999	CM004494.1_chromosome_B4	31740264	3.38154e-19
5856128	2		8.10817	0.50951	-0.292847	228	0.141272		TGCAGTTTATATCACTCAGTGACAACACTGGTTACGTATAATGTAGCAAAAGATATCTTACGGTTGAGT	5856128	1.52834e-30	CM007198.1_chromosome_B4	27073956	1.83879e-25		0	999		0	999		0	0	999	CM004494.1_chromosome_B4	31366648	6.12331e-27
5849393	2		8.10817	0.635229	-0.197069	228	0.0730369		TGCAGCCACTAATAAGGCAGTTTTGAATAGAAGAATACTCCTCGGTCGAATCCTCCAGACCACCTTCAA	5849393	1.52834e-30	CM007198.1_chromosome_B4	27056399	8.49476e-29		0	999		0	999		0	0	999	CM004494.1_chromosome_B4	31345825	3.6593e-29
5831025	2		8.44715	0.654554	-0.184054	228	0.0649748		TGCAGAGTCCCTTCATAGATAGATACTCCAGAATAATAAAAAGAACATAATGCTTTGCCATTCTTTAGT	5831025	1.52834e-30	CM007198.1_chromosome_B4	26956600	8.55507e-24		0	999		0	999		0	0	999	CM004494.1_chromosome_B4	31263593	1.70251e-27
5851728|F|0--12:A>G	2		9.12283	0.659243	-0.180954	228	0.0631039		TGCAGCAACCCAACAGCAAAGAAGCACATACAAAGGTTCTCCTGCCTATCAAACAAGCCACACTTACAG	5851728	1.52834e-30	CM007198.1_chromosome_B4	26828734	3.95223e-27	C7	29882679	9.67846e-21	NC_027754.1_chromosome_C7	29882679	9.68506e-21	chrC07	27603208	3	1.64947e-20	CM004494.1_chromosome_B4	31147228	2.8489e-25
5846422	2		9.47914	0.534291	-0.272222	228	0.125396		TGCAGAGTCCCTTCATAGATAGATACTCCAGATTAC	5846422	1.24354e-12		0	999		0	999		0	999		0	0	999	CM004494.1_chromosome_B4	31263593	8.40674e-11
5837185	2		10.3201	0.261764	-0.58209	228	0.409687		TGCAGATTCTTGTCCTAAGAAATGTGGAGGAATCCACATCCCGCACCCATTTGGAATCGGAAAGGGCTG	5837185	1.52834e-30		0	999		0	999		0	999		0	0	999		0	999
5030021	2		10.3201	0.266329	-0.574581	228	0.401908		TGCAGAAGGAACAACCACCAACGGAGACTACTTACTTACATTCAAGACAGGTGCATTTTTGGCTGGAAC	5030021	7.11069e-29	CM007202.1_chromosome_B8	20338546	3.95223e-27	C6	354199	9.61023e-26	NC_027753.1_chromosome_C6	39468209	9.61678e-26	chrA07	23741522	2	3.52031e-27	CM004494.1_chromosome_B4	32569925	7.921e-26
5837015	2		10.3201	0.275677	-0.559599	228	0.386488		TGCAGAATAAACGTCTTGCAGTTCCTTTGAATCAAATGAAAAGACAAGGGACACAAAAAGATTAC	5837015	2.44442e-28	CM007198.1_chromosome_B4	27760630	4.64776e-26	C6	367189	6.81685e-22	NC_027753.1_chromosome_C6	39455223	6.8215e-22	chrC06	36874696	2	1.1592e-21	CM004494.1_chromosome_B4	32557355	2.00657e-26
5855744	2		10.3201	0.360536	-0.443051	228	0.271705		TGCAGCTCCGACTACCATTGATCTTTCAATCGAGCAAGACGATGACGACGACGACGAAGAGATATCAAA	5855744	1.52834e-30	CM007202.1_chromosome_B8	20239218	2.39552e-19		0	999		0	999		0	0	999		0	999
5845683	2		10.3201	0.375097	-0.425857	228	0.25565		TGCAGCCAGAATACTCTCACCCCAAAAATTAC	5845683	1.59127e-10		0	999		0	999		0	999		0	0	999		0	999
5864517	2		10.3201	0.516313	-0.287087	228	0.136779		TGCAGAAGCAACTCCAGAGATATTCTCCTGTCACCCTCAAAGCAAATGTATTAC	5864517	2.40607e-22	CM007191.1_chromosome_A7	21119148	9.50231e-17	C6	369588	5.02335e-17	NC_027753.1_chromosome_C6	39452835	5.02678e-17	chrC06	36872308	1	8.46384e-17	CM004494.1_chromosome_B4	32554914	8.96234e-14
5830048	2		10.4696	0.163223	-0.787217	228	0.633383		TGCAGAACAAAGAGCTCCCATAGATTCGAGTATGATTCCCTACAAGGTTTCACAAAAAGTAGATTACAG	5830048	1.52834e-30		0	999		0	999		0	999		0	0	999		0	999
5863365	2		10.4696	0.229395	-0.639416	228	0.470127		TGCAGGATCTGGATCCAACTTTTACAGGAACACGAGAATGCAAATTCTTATCGGTAATGTTTAC	5863365	8.59634e-28	CM007200.1_chromosome_B6	13468970	7.58291e-24		0	999		0	999	chrA04	2096176	3	4.06498e-21	CM004494.1_chromosome_B4	30880853	3.27581e-24
5857396	2		10.4696	0.334952	-0.475017	228	0.302198		TGCAGATTTTACTTTCAGATGTTAGACGAACCGGTCGTGACGACGACTGACACGTTAC	5857396	7.47682e-23	LFQT01006979.1_Scaffold05823	986	6.46186e-19		0	999		0	999		0	0	999		0	999
3080500	2		10.4696	0.368851	-0.433149	228	0.262428		TGCAGCTAAATTCAAACAGAATGTCGTTTGCAGTCCCATCCAGGCTAGGTCTTCCTGGAACCAAGTTAC	3080500	7.11069e-29		0	999		0	999		0	999	chrA04	9716313	1	3.52031e-27		0	999
5836432	2		10.4696	0.397813	-0.400321	228	0.232286		TGCAGGTGATAAAAGTAAAACATTGTTGATCAGATTTAGATTCAGACAGTTTACTCCTTTTTAC	5836432	8.59634e-28	CM007200.1_chromosome_B6	13530664	5.94548e-15		0	999		0	999		0	0	999	CM004494.1_chromosome_B4	30941567	1.19498e-13
5863365|F|0--34:A>C	2		10.4696	0.491626	-0.308365	228	0.153588		TGCAGGATCTGGATCCAACTTTTACAGGAACACGAGAATGCAAATTCTTATCGGTAATGTTTAC	5863365	8.59634e-28	CM007200.1_chromosome_B6	13468970	7.58291e-24		0	999		0	999	chrA04	2096176	3	4.06498e-21	CM004494.1_chromosome_B4	30880853	3.27581e-24
5863367	2		10.4696	0.942429	-0.0257512	228	0.00169183		TGCAGGATCTGGATCCAACTTTTACAGGAACACGCGAATGCAAATTCTTATCGGTAATATTTAC	5863367	8.59634e-28	CM007200.1_chromosome_B6	13468970	1.64141e-20		0	999		0	999	chrA04	2096176	3	1.89125e-19	CM004494.1_chromosome_B4	30880853	3.27581e-24
5844883	2		10.8063	0.431941	-0.364576	228	0.200621		TGCAGTGTTATTTTGTGATGATGATTAC	5844883	1.84344e-08		0	999		0	999		0	999		0	0	999		0	999
5861939	2		11.8164	0.232505	-0.633568	228	0.46388		TGCAGAAGCGGTATTCCACTGAACTTCAAATGGATAGCCAAGCCGTTAC	5861939	1.23513e-19	CM007200.1_chromosome_B6	13173851	1.01727e-15		0	999		0	999		0	0	999		0	999
5845546	2		11.8164	0.332933	-0.477644	228	0.304739		TGCAGATGAATCTAATATCAGCAAATGATAAGCTATTATTAC	5845546	7.29484e-16		0	999		0	999		0	999		0	0	999	CM004494.1_chromosome_B4	30583927	5.67618e-14
5861940	2		11.8164	0.496547	-0.304039	228	0.150124		TGCAGAAGCGGTATTCCACTGAGCTTCAAATGGATAGTCAGGCCGTTAC	5861940	1.23513e-19		0	999		0	999		0	999		0	0	999	CM004494.1_chromosome_B4	30583966	9.59315e-18
5861939|F|0--37:C>T	2		11.8164	0.677886	-0.168844	228	0.0559846		TGCAGAAGCGGTATTCCACTGAACTTCAAATGGATAGCCAAGCCGTTAC	5861939	1.23513e-19	CM007200.1_chromosome_B6	13173851	1.01727e-15		0	999		0	999		0	0	999		0	999
5834466	2		12.1531	0.0996688	-1.00144	228	0.884686		TGCAGTGCAAGTGAACAATGTGGTGTACCGAAACATAAGTGGTACGAGCACAACGGATGTGGCGATAAT	5834466	1.52834e-30	CM007200.1_chromosome_B6	13146901	8.49476e-29		0	999		0	999		0	0	999	CM004494.1_chromosome_B4	30551578	3.6593e-29
5855018	2		12.1531	0.344658	-0.462611	228	0.290268		TGCAGTGAGAAATATCCATGCCAAAGTATAGTGCTTGAGAATGTGGACATCAGAGGAGGAACAGCTTCT	5855018	1.52834e-30	CM007200.1_chromosome_B6	13146977	1.83879e-25		0	999		0	999		0	0	999	CM004494.1_chromosome_B4	30551654	7.921e-26
5836049	2		12.1531	0.377307	-0.423305	228	0.25329		TGCAGCTACCAGTACCTAATGTCTTTATTCCTACAGATTTTTCACTAAAGGATGTTGAAGATAAGGTTC	5836049	1.52834e-30	CM007200.1_chromosome_B6	13156467	8.49476e-29		0	999		0	999		0	0	999	CM004494.1_chromosome_B4	30559417	1.32546e-23
5845824	2		12.1531	0.533052	-0.27323	228	0.126159		TGCAGCTTTACATCAGGGGCAGACTGCACCCATTCCTGTAATTGTTAC	5845824	4.28913e-19	CM007200.1_chromosome_B6	13156422	7.86406e-17	C4	28235927	4.01868e-17	NC_027751.1_chromosome_C4	28235927	4.02142e-17	chrC04	25219035	2	7.00456e-17	CM004494.1_chromosome_B4	30559372	1.54106e-15
5855018|F|0--23:A>G	2		12.1531	0.778175	-0.108923	228	0.0257466		TGCAGTGAGAAATATCCATGCCAAAGTATAGTGCTTGAGAATGTGGACATCAGAGGAGGAACAGCTTCT	5855018	1.52834e-30	CM007200.1_chromosome_B6	13146977	1.83879e-25		0	999		0	999		0	0	999	CM004494.1_chromosome_B4	30551654	7.921e-26
5845576	2		12.4898	0.456811	-0.340263	228	0.179837		TGCAGATTCCTAAACAACATATTTCACATTTCAAGCCGAGTGAGGCTAGCTTAC	5845576	2.40607e-22		0	999		0	999		0	999		0	0	999		0	999
5855061|F|0--28:G>A	2		13.8366	0.744489	-0.128142	228	0.0344656		TGCAGTGATCGCCTGACAAAACGTTTCAGTATAAAGTTGCCGAAACTGTTGTGTATATTAGTATATTCG	5855061	1.52834e-30	CM007198.1_chromosome_B4	26686446	3.98029e-22		0	999		0	999		0	0	999	CM004494.1_chromosome_B4	30385006	2.8489e-25
5845560	2		13.8366	0.910744	-0.0406035	228	0.00407656		TGCAGATGTCAAAAAGTACAAAAATATTTAC	5845560	5.28297e-10	CM007198.1_chromosome_B4	26695431	9.56251e-07		0	999		0	999		0	0	999	CM004494.1_chromosome_B4	30398122	3.50279e-08
19818873	2		13.8366	0.988355	-0.00508689	228	6.91e-05		TGCAGGAGGAAAAAAAAAAGAGAAATGAGTTTCACAATCCCTTAC		999		0	999		0	999		0	999		0	0	999		0	999
5838595	2		14.1745	0.416048	-0.380856	228	0.214886		TGCAGAGCAGAACTTCCAATCAACTGGCTCAAATCTATAGTCATGGTTTCAGAGAGAACAGGGATGATG	5838595	1.52834e-30	CM007198.1_chromosome_B4	26701980	8.49476e-29		0	999		0	999		0	0	999	CM004494.1_chromosome_B4	30403724	7.921e-26
19818874	2		14.1745	0.463174	-0.334255	228	0.174802		TGCAGGAGGAAAAAAAAGAGAAATGAGTTTCACAATCCCTTAC		999		0	999		0	999		0	999		0	0	999		0	999
5842613	2		14.1745	0.629736	-0.200842	228	0.0754344		TGCAGATGTCAAAAAGTACAAAAATATTAC	5842613	1.74175e-09	CM007198.1_chromosome_B4	26695432	2.32639e-07		0	999		0	999		0	0	999	CM004494.1_chromosome_B4	30398123	4.02769e-07
5836596	2		14.5123	0.416721	-0.380155	228	0.214266		TGCAGTCAAACTAGCAGAACATAAGTGTAAGAAAAAAGCCTAAAACTCTAGAGTAGCACGCAGCCAACA	5836596	1.52834e-30	CM007198.1_chromosome_B4	26619922	8.49476e-29		0	999		0	999		0	0	999	CM004494.1_chromosome_B4	30334482	1.71459e-22
5841762	2		14.5123	0.495804	-0.30469	228	0.150644		TGCAGAAGTGGGTTGTTTATAGGAAACTTTAC	5841762	1.59127e-10	CM007188.1_chromosome_A4	2368340	1.07578e-06	C4	27621270	5.49776e-07	NC_027751.1_chromosome_C4	27621270	5.50151e-07	chrC04	24722136	2	9.58195e-07		0	999
5836724	2		15.5258	0.261368	-0.582748	228	0.41037		TGCAGTGCTGTTTTGAGTCTCTCAGTTTCCTGTGTCGTTAGACTACTATCAGGTGGCTATTAC	5836724	3.02152e-27		0	999		0	999		0	999		0	0	999		0	999
5846208	2		15.5258	0.312146	-0.505642	228	0.332144		TGCAGTTCAGACATACTGCTCAAAAAAATTAC		999		0	999		0	999		0	999		0	0	999		0	999
5846209	2		15.5258	0.394579	-0.403866	228	0.235494		TGCAGTTCAGACATTATGCACAAAAAGTGGAAGAAACTTAC	5846209	2.50443e-15		0	999		0	999		0	999		0	0	999		0	999
5856095	2		15.5258	0.491304	-0.30865	228	0.153817		TGCAGTGCTGTTTTGAGTCACTCAGTTTCCTGTGTCGTTAGACTACTGCTGTTTATCAGGTGTCTATTA	5856095	1.52834e-30	CM007198.1_chromosome_B4	26563608	1.83879e-25		0	999		0	999		0	0	999	CM004494.1_chromosome_B4	30277437	7.921e-26
5856094	2		15.5258	0.545897	-0.262889	228	0.118409		TGCAGTGCTGTTTTGAGCCTCTCAGTTACCTGTGTCGTTAGACTACTGCTGTTTATCAGGTGTCTATTA	5856094	1.52834e-30	CM007198.1_chromosome_B4	26563608	3.95223e-27		0	999		0	999		0	0	999	CM004494.1_chromosome_B4	30277437	1.70251e-27
5856095|F|0--17:T>C	2		15.5258	0.856081	-0.0674853	228	0.0106712		TGCAGTGCTGTTTTGAGTCACTCAGTTTCCTGTGTCGTTAGACTACTGCTGTTTATCAGGTGTCTATTA	5856095	1.52834e-30	CM007198.1_chromosome_B4	26563608	1.83879e-25		0	999		0	999		0	0	999	CM004494.1_chromosome_B4	30277437	7.921e-26
5856459	2		15.8625	0.53202	-0.274072	228	0.126796		TGCAGCTCTCTTTGATTAGAGCAGTGTCTTTCAAAAAGAAGGTAAGCAAAGGGCAGAAGAAAAGTTTTA	5856459	1.52834e-30		0	999		0	999		0	999		0	0	999		0	999
5847817	2		15.8625	0.980432	-0.00858257	228	0.000195155		TGCAGATAGTTTTACTTGAATGCACAAAGATTAC	5847817	1.41938e-11		0	999		0	999		0	999		0	0	999		0	999
5847952	2		18.5561	0.406727	-0.390697	228	0.223637		TGCAGCATCCAACTGCAAGACCGATTTCGTCTCTTACATCTAGCTAGACTTTCATCTTAC	5847952	1.3077e-25		0	999		0	999		0	999		0	0	999		0	999
5846552	2		20.913	0.0616465	-1.21009	228	1.14177		TGCAGCCTTTGCCACCTCAGAAGAAGCTATGGCAACATGGATTGGCTTAC	5846552	3.55254e-20		0	999		0	999		0	999		0	0	999		0	999
5846580	2		20.913	0.0719866	-1.14275	228	1.05768		TGCAGCTGATGAGAGGGTTGAAGCTAAGCGCAGAGGTTAC	5846580	8.57861e-15	CM007188.1_chromosome_A4	1675179	8.83519e-10	C4	26189083	4.79745e-10	NC_027751.1_chromosome_C4	26189083	4.80072e-10	chrC04	23253136	2	7.86954e-10		0	999
5851205|F|0--50:A>T	2		20.913	0.167645	-0.77561	228	0.620222		TGCAGATCAACCAAATCTTTGTCAGTAAATCAAACTCAGCTTCTGAACAAAGGAAGCTTTTGGAACACG	5851205	1.52834e-30	CM007198.1_chromosome_B4	26188320	8.49476e-29		0	999		0	999		0	0	999	CM004494.1_chromosome_B4	29898947	1.35389e-08
5851206	2		20.913	0.218121	-0.661304	228	0.493665		TGCAGATCAACCAAATCTTTGTCAGTAAATCAAACTCAGCTTCTGAACAATGGAAGCTTTTGGAACATG	5851206	1.52834e-30	CM007198.1_chromosome_B4	26188320	5.11253e-26		0	999		0	999		0	0	999	CM004494.1_chromosome_B4	29898947	4.86947e-08
5851205	2		20.913	0.615615	-0.210691	228	0.0818188		TGCAGATCAACCAAATCTTTGTCAGTAAATCAAACTCAGCTTCTGAACAAAGGAAGCTTTTGGAACACG	5851205	1.52834e-30	CM007198.1_chromosome_B4	26188320	8.49476e-29		0	999		0	999		0	0	999	CM004494.1_chromosome_B4	29898947	1.35389e-08
5861464|F|0--53:T>C	2		21.2497	0.0910745	-1.0406	228	0.932124		TGCAGTGAAGTTGTGAAGGTAACATTCTTTATTGTAATCGATGTCAATAAGATTTCTCACCCATGTCTT	5861464	1.52834e-30	CM007198.1_chromosome_B4	26184859	3.95223e-27		0	999		0	999	chrA04	784039	1	1.63784e-25	CM004494.1_chromosome_B4	29895063	3.6593e-29
5865063	2		21.5864	0.180984	-0.742359	228	0.582821		TGCAGCGTATGACTTGAAGAAAGTTCCGTTTTTGAAATCCTTGAGCAGCTCATCTAACTTCATCTTACA	5865063	1.52834e-30		0	999		0	999		0	999	chrC05	34195666	1	4.61869e-16		0	999
5865355|F|0--68:C>T	2		22.5965	0.0629956	-1.20069	228	1.12997		TGCAGACATATATTCCACAGGAGCTGTCTCGACCGTTGGATGGATCACGACCAGAAGACGTGTCCTCTC	5865355	1.52834e-30	CM007198.1_chromosome_B4	25942140	3.05526e-28	C4	25475569	7.42916e-27	NC_027751.1_chromosome_C4	25475569	7.43423e-27	chrC08	30779456	6	3.52031e-27	CM004494.1_chromosome_B4	29648000	1.31612e-28
5850183|F|0--68:G>A	2		22.5965	0.0722522	-1.14115	228	1.05569		TGCAGACAAACACTATTCAACGTATTGTGTCTTACACTCTTTTGTTTTGTTATGAATGAACACTAACTG	5850183	1.52834e-30	CM007198.1_chromosome_B4	25958916	3.05526e-28		0	999		0	999		0	0	999	CM004494.1_chromosome_B4	29665221	1.31612e-28
5865355	2		22.5965	0.221656	-0.65432	228	0.486129		TGCAGACATATATTCCACAGGAGCTGTCTCGACCGTTGGATGGATCACGACCAGAAGACGTGTCCTCTC	5865355	1.52834e-30	CM007198.1_chromosome_B4	25942140	3.05526e-28	C4	25475569	7.42916e-27	NC_027751.1_chromosome_C4	25475569	7.43423e-27	chrC08	30779456	6	3.52031e-27	CM004494.1_chromosome_B4	29648000	1.31612e-28
5860702|F|0--36:A>T	2		25.9635	0.10656	-0.972405	228	0.849785		TGCAGCTTCAGACAACATTCAGCTTCAAAGCACCATACCATATAATCAGGTCTCATTCTTTTTTAGTTA	5860702	1.52834e-30	CM007188.1_chromosome_A4	685645	8.49476e-29	C4	24306148	1.24316e-24	NC_027751.1_chromosome_C4	24306148	1.24401e-24	chrC04	21766050	2	2.11868e-24	CM004494.1_chromosome_B4	29209897	1.70251e-27
5860702	2		25.9635	0.144049	-0.841491	228	0.695598		TGCAGCTTCAGACAACATTCAGCTTCAAAGCACCATACCATATAATCAGGTCTCATTCTTTTTTAGTTA	5860702	1.52834e-30	CM007188.1_chromosome_A4	685645	8.49476e-29	C4	24306148	1.24316e-24	NC_027751.1_chromosome_C4	24306148	1.24401e-24	chrC04	21766050	2	2.11868e-24	CM004494.1_chromosome_B4	29209897	1.70251e-27
5860703	2		25.9635	0.209643	-0.67852	228	0.512347		TGCAGCTTCAGACAACATTCAGCTTCAAAGCACCATTCCATATAATCAGGTCTCATTTTTTTTTAGTCA	5860703	7.11069e-29	CM007188.1_chromosome_A4	685645	2.37863e-24		0	999		0	999		0	0	999	CM004494.1_chromosome_B4	29209897	4.76721e-23
5862757	2		25.9635	0.448045	-0.348678	228	0.186957		TGCAGATGCTTTATACTTTGATTCAAGACTGTAAAATGTAGTTACTTTATAGGCTGGCAGTTTTGGACC	5862757	1.52834e-30	CM007188.1_chromosome_A4	688540	1.42147e-26		0	999		0	999		0	0	999	CM004494.1_chromosome_B4	29212751	2.8489e-25
5862756|F|0--32:C>A	2		26.3002	0.179191	-0.746684	228	0.587659		TGCAGATGCTTTATACTTTGATTCAAGACTGTCAAATGTAGTTACTTTATAGGCTGGCAGTTTTGGACA	5862756	1.52834e-30	CM007188.1_chromosome_A4	688540	8.49476e-29		0	999		0	999		0	0	999	CM004494.1_chromosome_B4	29212751	6.12331e-27
5859221|F|0--42:T>A	2		26.3002	0.209956	-0.677873	228	0.511642		TGCAGAACCTGGTACGTATGTAGTAGCAATTTGATTTATTTTTTAGAGTTGCACTCTGATGATAAATTA	5859221	1.52834e-30	CM007188.1_chromosome_A4	685542	8.55507e-24		0	999		0	999		0	0	999	CM004494.1_chromosome_B4	29209794	3.68528e-24
5862756	2		26.3002	0.329534	-0.4821	228	0.309062		TGCAGATGCTTTATACTTTGATTCAAGACTGTCAAATGTAGTTACTTTATAGGCTGGCAGTTTTGGACA	5862756	1.52834e-30	CM007188.1_chromosome_A4	688540	8.49476e-29		0	999		0	999		0	0	999	CM004494.1_chromosome_B4	29212751	6.12331e-27
5859221	2		26.3002	0.371727	-0.429776	228	0.259287		TGCAGAACCTGGTACGTATGTAGTAGCAATTTGATTTATTTTTTAGAGTTGCACTCTGATGATAAATTA	5859221	1.52834e-30	CM007188.1_chromosome_A4	685542	8.55507e-24		0	999		0	999		0	0	999	CM004494.1_chromosome_B4	29209794	3.68528e-24
5832349	2		26.3002	0.374279	-0.426805	228	0.256529		TGCAGCGAAGTCATGATTGTCCAGAGCATGGCAGAGCTGTGCGAGTTTATCGGCAGCATTCTTGGAGAT	5832349	1.52834e-30	CM007188.1_chromosome_A4	687124	8.49476e-29		0	999		0	999		0	0	999	CM004494.1_chromosome_B4	29211383	3.6593e-29
5859222	2		26.3002	0.446638	-0.350045	228	0.188121		TGCAGAACCTGGTACGTATGTAGTAGCAATTTGATTTATTTTATAGAGTTTGACTCTGATGATAAATTA	5859222	1.52834e-30	CM007188.1_chromosome_A4	685542	8.49476e-29		0	999		0	999		0	0	999	CM004494.1_chromosome_B4	29209794	3.6593e-29
5832352	2		30.0039	0.441809	-0.354765	228	0.192157		TGCAGCGACAAATGCATAAAAAGCAGCAAGTTGATAACAGTTCATCTATGCTACCTAAACATGCTCCAG	5832352	1.52834e-30		0	999		0	999		0	999		0	0	999		0	999
5837615	2		30.0176	0.617268	-0.209526	228	0.0810545		TGCAGTCTACGCTCCCACGGTTTTGACTTTCCACCTGGTTTTACCCTCTTTTGGCTAAAAACCACTTAC	5837615	1.52834e-30	CM007198.1_chromosome_B4	24357375	3.05526e-28		0	999		0	999		0	0	999		0	999
14764273	2		30.0176	0.685722	-0.163852	228	0.0531408		TGCAGCTCCAAGCTCCAACCGCTTTCTCTCACTAGCTTAC	14764273	8.57861e-15	CM007198.1_chromosome_B4	24357781	1.46802e-12		0	999		0	999		0	0	999		0	999
5830344	2		30.6773	0.221724	-0.654187	228	0.485985		TGCAGAATCAAAACAAACACAAAGGTGATGGGATCGAAATTTCTTCAGCGATCCGAAATAGGATCGAAG	5830344	1.52834e-30	LFQT01009388.1_Scaffold00336	13202	8.49476e-29		0	999		0	999		0	0	999		0	999
5852448|F|0--10:C>G	2		30.6773	0.54317	-0.265064	228	0.120026		TGCAGCCTATCTGCTCAACATAAAAACTGAAGAATTTCTCAACTTCCGTTTGCACATTTCTCCTCCATT	5852448	1.52834e-30	CM007198.1_chromosome_B4	24261829	8.49476e-29		0	999		0	999		0	0	999	CM004494.1_chromosome_B4	27880015	3.6593e-29
3170157	2		32.3723	0.26324	-0.579649	228	0.407154		TGCAGAAGGATATAGCTTTCCTGTAAAATTCAGGTCAGAAAGCTTTAC	3170157	1.99554e-17	CM007198.1_chromosome_B4	24175457	7.86406e-17	C6	22917224	3.12869e-13	NC_027753.1_chromosome_C6	16905205	3.13082e-13	chrA07	13107928	2	1.51622e-13	CM004494.1_chromosome_B4	27822956	3.3123e-17
5842209	2		34.7451	0.503357	-0.298124	228	0.145425		TGCAGAGCCAACGTATATGGCTCCAGATACCCCATTAC	5842209	1.07441e-13		0	999		0	999		0	999		0	0	999	CM004494.1_chromosome_B4	27700849	3.48877e-10
5857200|F|0--11:G>T	2		34.7451	0.608264	-0.215908	228	0.0852715		TGCAGATAGTGGGCCATCAGCAGTAAGAACATAGTAGAGACTTAC	5857200	1.78173e-17	CM007198.1_chromosome_B4	24103751	1.48949e-13		0	999		0	999		0	0	999	CM004494.1_chromosome_B4	27753987	6.57242e-14
5843060	2		35.0818	0.273113	-0.563658	228	0.390652		TGCAGCATCAAGGGATCCGAGTTCAAGTTATCCCTGGTAATGTTCTTAC	5843060	1.23513e-19	CM007198.1_chromosome_B4	24077649	1.01727e-15	C4	38010329	1.96144e-10	NC_027751.1_chromosome_C4	38010329	1.96278e-10	chrC04	34645021	1	3.41879e-10	CM004494.1_chromosome_B4	27696752	4.46326e-16
5857208|F|0--22:T>C	2		35.0818	0.335186	-0.474715	228	0.301906		TGCAGATATATGCGATGCCGGTTTTTGACATGATGGAAACTTTATTGGTTAC	5857208	2.92937e-21	CM007191.1_chromosome_A7	15903795	2.45979e-17	C4	37958562	3.65013e-13	NC_027751.1_chromosome_C4	37958562	3.65262e-13	chrAnn_random	32258198	2	2.19097e-17	CM004494.1_chromosome_B4	27713144	2.30934e-19
5829995	2		35.0818	0.608542	-0.21571	228	0.0851396		TGCAGAAAGTCCATCTCTTCTCCACCTCGTCCAAAAACCTGAAACATCAAATATCAAAGTTGCAAACAG	5829995	1.52834e-30	CM007198.1_chromosome_B4	24077695	6.61348e-25		0	999		0	999		0	0	999	CM004494.1_chromosome_B4	27696798	2.8489e-25
5836966	2		35.0818	0.737349	-0.132327	228	0.036494		TGCAGAAAGTCCATCTCTTCTCCACCTCGTCCAAAAACCTGAAACATCAAATCAAAGTTGCAAACAGAT	5836966	1.52834e-30	CM007198.1_chromosome_B4	24077695	8.49476e-29		0	999		0	999		0	0	999	CM004494.1_chromosome_B4	27696798	3.6593e-29
5837873	2		35.0818	0.831337	-0.0802226	228	0.0147171		TGCAGAGTTCCATACAGGTGTATAATGTTTCTTCTCTTTTATTGTAGAGTTTAGGCCTGGGCATTTTAC	5837873	1.52834e-30		0	999		0	999		0	999		0	0	999		0	999
5846444	2		35.0818	0.84381	-0.0737552	228	0.0125933		TGCAGATATGCCTTATGCCAACGAAACAGAAATGGAGATGCATCAATTAC	5846444	3.55254e-20		0	999		0	999		0	999		0	0	999		0	999
5846085	2		35.0818	0.867726	-0.0616176	228	0.00899871		TGCAGTCATATACCTCGATGATGAGAGTCTTAC	5846085	4.76465e-11		0	999		0	999		0	999		0	0	999		0	999
5837250	2		35.0818	0.930367	-0.0313455	228	0.00247703		TGCAGCAGCAAGGGATCCGAGTTCAAGTTATCCCTGGTAATGTTCTTTCTTATGCTCACTCTGTGCTCT	5837250	1.52834e-30	LFQT01002614.1_Scaffold00054	115170	1.43157e-21	C4	38010329	7.48191e-22	NC_027751.1_chromosome_C4	38010329	7.48701e-22	chrC04	34645021	1	1.27512e-21	CM004495.1_chromosome_B5	21378356	6.16678e-22
5837087	2		35.0818	0.938604	-0.0275177	228	0.0019246		TGCAGAGCCAACGTATATGGCTCCAGATACCCCAGCAAGAACATCAGAGTAAACAGGGATGCTCCAGAA	5837087	1.52834e-30		0	999		0	999		0	999		0	0	999	CM004494.1_chromosome_B4	27700849	3.68528e-24
5837121	2		35.4185	0.598692	-0.222797	228	0.089904		TGCAGAGTTCCGTGGTCTCTGTGCGGAAGAGGTAAGACGGACGTTACATGTTCTTTTTGGTGAGAGATA	5837121	1.52834e-30		0	999		0	999		0	999		0	0	999		0	999
5856965|F|0--6:C>T	2		35.4185	0.613714	-0.212034	228	0.0827031		TGCAGACTATTCTCACTTCCACACCTGCTTTTATTCAGTTAC	5856965	7.29484e-16	CM007198.1_chromosome_B4	24034241	5.93992e-12		0	999		0	999		0	0	999	CM004494.1_chromosome_B4	27645283	4.41911e-10
5864463|F|0--8:C>T	2		35.4185	0.667594	-0.175488	228	0.0598525		TGCAGTTCCCTAACAAGCTTTGCTGCATCTGGTTGGAAACTTGAGAAGATCACTGGTCTGTCTTTGGCA	5864463	1.52834e-30	CM007198.1_chromosome_B4	24004797	3.95223e-27	C4	38174292	4.47121e-24	NC_027751.1_chromosome_C4	38174292	4.47425e-24	chrA07	13246403	4	7.62012e-24	CM004494.1_chromosome_B4	27627088	3.6593e-29
5845963	2		35.4185	0.986795	-0.00577328	228	8.89e-05		TGCAGGTACAACATCTCCTTACTTCTGTAACATTCTATAGAAATATTAC	5845963	1.23513e-19	CM007194.1_chromosome_A10	4918972	2.18648e-17		0	999		0	999		0	0	999		0	999
5864463	2		35.5308	0.722482	-0.141173	228	0.0409263		TGCAGTTCCCTAACAAGCTTTGCTGCATCTGGTTGGAAACTTGAGAAGATCACTGGTCTGTCTTTGGCA	5864463	1.52834e-30	CM007198.1_chromosome_B4	24004797	3.95223e-27	C4	38174292	4.47121e-24	NC_027751.1_chromosome_C4	38174292	4.47425e-24	chrA07	13246403	4	7.62012e-24	CM004494.1_chromosome_B4	27627088	3.6593e-29
5833910	2		35.7552	0.330847	-0.480372	228	0.307385		TGCAGTAACAAACTTGATCCAGTGGCGGAGCCACATGAAGTAAGGGAGGGGCAGTTGCCCCTGATGAAA	5833910	1.52834e-30	CM007198.1_chromosome_B4	24063975	8.49476e-29	C6	34127123	1.61955e-18	NC_027753.1_chromosome_C6	5695285	1.62065e-18	chrC04	23590081	2	2.76014e-18	CM004493.1_chromosome_B3	33006893	6.21056e-17
5864464	2		35.7552	0.450783	-0.346033	228	0.184711		TGCAGTTCTCTAACAAGCTTTGCTGCATCAGGTTGGAAACTTGAGAAGATCACTGGTCTGTCTTTGGCA	5864464	1.52834e-30	CM007191.1_chromosome_A7	15947551	8.55507e-24	C6	22483431	5.78387e-23	NC_027753.1_chromosome_C6	17338977	5.78781e-23	chrA07	13246403	4	7.62012e-24	CM004494.1_chromosome_B4	27627088	7.921e-26
5854130|F|0--32:C>A	2		35.7552	0.502536	-0.298833	228	0.145986		TGCAGGTATGATCATAATACTAGTAGTCCAACCAATTCTAAGTGTATTAGTAAAAAATGTCTTAC	5854130	2.44442e-28	CM007198.1_chromosome_B4	24004923	6.05494e-20		0	999		0	999		0	0	999	CM004494.1_chromosome_B4	27627213	1.21622e-18
5834930	2		36.0931	0.58159	-0.235383	228	0.0985759		TGCAGTTGTTGGACGTTGGTCTCGTTGTAGCTGGCTTGAGATAGGTAGCAGAAACGTCAAGACATTACA	5834930	1.52834e-30		0	999		0	999		0	999		0	0	999		0	999
5850908	2		36.4309	0.269956	-0.568707	228	0.395846		TGCAGAGTAAGCTGCATGGTAGCTGTGGATGAAGATATTCCAGTTTCGGCTGTAATATGCTTGGGATAT	5850908	1.52834e-30		0	999		0	999		0	999		0	0	999	CM004494.1_chromosome_B4	27418754	1.70251e-27
5850909|F|0--47:A>G	2		36.4309	0.373237	-0.428016	228	0.257652		TGCAGAGTAAGCTGCATGGTAGCTGTGGATGAAGATATTCCAGTTTCAGCTGTAGTATGCTTGGGATAT	5850909	1.52834e-30	CM007198.1_chromosome_B4	23766996	8.55507e-24	C6	21852924	4.47121e-24	NC_027753.1_chromosome_C6	17969484	4.47425e-24	chrC06	16611500	2	7.62012e-24	CM004494.1_chromosome_B4	27418754	1.70251e-27
5850909	2		36.4309	0.996334	-0.00159519	228	6.85e-06		TGCAGAGTAAGCTGCATGGTAGCTGTGGATGAAGATATTCCAGTTTCAGCTGTAGTATGCTTGGGATAT	5850909	1.52834e-30	CM007198.1_chromosome_B4	23766996	8.55507e-24	C6	21852924	4.47121e-24	NC_027753.1_chromosome_C6	17969484	4.47425e-24	chrC06	16611500	2	7.62012e-24	CM004494.1_chromosome_B4	27418754	1.70251e-27
5861669	2		37.1043	0.376465	-0.424275	228	0.254186		TGCAGTTGTCGTGTTCGTCGGAATGTCGTCGGTATATTCCGAGGAATTTCCGACGACCTATGTTTTTAC	5861669	7.11069e-29	LFQT01005861.1_Scaffold01750	11762	3.0988e-18	C4	10270653	1.26088e-14	NC_027751.1_chromosome_C4	10270653	1.26174e-14	chrCnn_random	72080857	12	4.61869e-16	LFLV01002393.1scaffold_67.1	867753	2.86912e-20
5844514	2		37.1043	0.557737	-0.25357	228	0.111559		TGCAGTATGCCAACTTTTTGCAAACTAAATATAAATCTGCTGATAAGCTTTTAC	5844514	2.40607e-22	CM007198.1_chromosome_B4	22991192	4.38983e-20		0	999		0	999		0	0	999	CM004494.1_chromosome_B4	27257020	8.89915e-19
5862327	2		37.1043	0.561537	-0.250622	228	0.109419		TGCAGCTCAAGAAGCAGAGCAAGATCAACACGCTGATCTGGTTAC	5862327	1.78173e-17		0	999		0	999		0	999		0	0	999		0	999
5833511	2		37.7777	0.591406	-0.228114	228	0.0935353		TGCAGGGCACTTGAAGTCACGAGGTGGAGTCTTACCACAGTCGATAAGAAGCTCAAGAGCAATGGGAAT	5833511	1.52834e-30	CM007198.1_chromosome_B4	22908546	6.61348e-25	Scaffold01083	28879	3.45645e-25	NW_013617649.1_UnpScaffold01083	28879	3.45881e-25	chrA05_random	762450	6	5.89072e-25	CM004494.1_chromosome_B4	27140886	1.31612e-28
5832654	2		37.7777	0.645505	-0.1901	228	0.0686786		TGCAGCTCCACAGCGAAGGAATCCTCTCTTGGGTTGATCTCTTTGTACGTTTCATTTGTTACAGTGAAA	5832654	1.52834e-30		0	999		0	999		0	999		0	0	999	CM004494.1_chromosome_B4	27140818	6.12331e-27
5832999	2		38.1201	0.786096	-0.104525	228	0.0238954		TGCAGCTTTGTCTAGTTTCTGTGATAAAATGTTCATTGCCAATCCAAACAGGTAAGGACTTAC	5832999	3.02152e-27	CM007198.1_chromosome_B4	22610189	5.71164e-25		0	999		0	999		0	0	999		0	999
5860723	2		39.1245	0.40733	-0.390054	228	0.223063		TGCAGCTTCTATGCCTGCATGGCTCAAGTGGGGTTTCTGGGCAAATCCTTTGAGTTATAGTGAGATTGG	5860723	1.52834e-30	CM007191.1_chromosome_A7	16445374	1.83879e-25	C6	20939826	4.47121e-24	NC_027753.1_chromosome_C6	18882582	4.47425e-24	chrC06	17515118	2	7.62012e-24		0	999
5843346	2		39.1245	0.607557	-0.216413	228	0.0856085		TGCAGCGGAAGCTGAGGCAGCTGCTCAACAGTTTAC	5843346	1.24354e-12		0	999		0	999		0	999		0	0	999		0	999
5851799|F|0--13:G>T	2		39.1245	0.738664	-0.131553	228	0.0361155		TGCAGCAAGTGCTGGGCATTTGGCAAGAACCGAAGCAAACTGAACCGACCAGACCAAATGTCCGGTTAC	5851799	1.52834e-30	CM007198.1_chromosome_B4	22568138	1.42147e-26		0	999		0	999		0	0	999	CM004494.1_chromosome_B4	26802868	1.31612e-28
5850804|F|0--15:T>G	2		39.1245	0.796876	-0.0986095	228	0.0214947		TGCAGAGGACATAGTTACAAACCCAAAACCCCTGCTTCGGCCAGTCACTTTGTCATAGATAACCTACAA	5850804	1.52834e-30	CM007198.1_chromosome_B4	22549983	3.95223e-27		0	999		0	999		0	0	999	CM004494.1_chromosome_B4	26791660	7.921e-26
5865447|F|0--40:T>C	2		40.8137	0.953636	-0.0206172	228	0.00109658		TGCAGCCGGTGGCCTAACTATGGAAATGGTTTTCATTGATTTTAC	5865447	1.78173e-17		0	999		0	999		0	999		0	0	999		0	999
5836718	2		40.8137	0.587208	-0.231208	228	0.0956699		TGCAGTGCCTTCTCTGCCTGCGTCGCCGAGGTATTCTCCCGATTCCCCCGAATTTTCCATGCGTTTTTT	5836718	1.52834e-30	CM007198.1_chromosome_B4	22355378	3.95223e-27	C6	20609369	1.60813e-23	NC_027753.1_chromosome_C6	19213039	1.60923e-23	chrC06_random	2065430	1	2.74068e-23	CM004494.1_chromosome_B4	26618169	1.70251e-27
5845953	2		42.8476	0.449666	-0.34711	228	0.185625		TGCAGGGTATAGCATGTCGAGAGTACCTTAC	5845953	5.28297e-10	CM007198.1_chromosome_B4	20960171	7.39227e-08		0	999		0	999		0	0	999		0	999
5842249	2		44.5299	0.0671009	-1.17327	228	1.09567		TGCAGAGGAATGAGGAACCGGTGGATCGCTTTCTCTAGTTGTTTTTTTTTAC	5842249	2.92937e-21	CM007198.1_chromosome_B4	20328251	5.28698e-19		0	999		0	999		0	0	999	CM004494.1_chromosome_B4	24804485	2.30934e-19
5842696	2		44.5299	0.165765	-0.780508	228	0.62577		TGCAGATTGATCATTGGACTCGTGATATAGTGTATTTTGACTTTAC	5842696	5.15204e-18		0	999		0	999		0	999		0	0	999		0	999
5861948|F|0--36:G>A	2		44.5299	0.527182	-0.278039	228	0.129815		TGCAGAAGTTCATCGCCAGGTTCACTTTCTTTTCCCGTTTAC	5861948	7.29484e-16	CM007198.1_chromosome_B4	20306415	5.93992e-12	C6	17234162	5.36186e-10	NC_027753.1_chromosome_C6	22588273	5.36551e-10	chrA07	15120464	2	2.46153e-10	CM004494.1_chromosome_B4	24791757	5.67618e-14
5863197|F|0--12:A>T	2		44.5299	0.553686	-0.256736	228	0.113872		TGCAGCCTGGCGAACAGAGTTGTATATTGGCTTTTGCAAACGCTCCAAGTCTCTCTTCTCGTCAGATGT	5863197	1.52834e-30	CM007198.1_chromosome_B4	20306349	1.83879e-25	C6	17234096	2.08025e-22	NC_027753.1_chromosome_C6	22588312	2.08167e-22	chrC06	20200136	1	3.5453e-22	CM004494.1_chromosome_B4	24791691	7.921e-26
5863197	2		44.5299	0.604472	-0.218624	228	0.0870879		TGCAGCCTGGCGAACAGAGTTGTATATTGGCTTTTGCAAACGCTCCAAGTCTCTCTTCTCGTCAGATGT	5863197	1.52834e-30	CM007198.1_chromosome_B4	20306349	1.83879e-25	C6	17234096	2.08025e-22	NC_027753.1_chromosome_C6	22588312	2.08167e-22	chrC06	20200136	1	3.5453e-22	CM004494.1_chromosome_B4	24791691	7.921e-26
5856499	2		44.5299	0.813427	-0.0896817	228	0.0180709		TGCAGAAACCTTCCTAGATACTGTCAATAATCAATAAGGGCATCCGCAATGGTGTTACCCACTGAAGTC	5856499	1.52834e-30	CM007198.1_chromosome_B4	20289980	8.49476e-29		0	999		0	999		0	0	999		0	999
5863198	2		44.5299	0.938814	-0.0274204	228	0.00191142		TGCAGCCTGGCGTACAGAGTTGTATATTGGCTTTTGCAAACGCTCCAAGTCTCTCTTCTCTTCAGATGT	5863198	1.52834e-30	CM007198.1_chromosome_B4	20306349	8.49476e-29	C6	17234096	9.61023e-26	NC_027753.1_chromosome_C6	22588312	9.61678e-26	chrC06	20200136	5	1.63784e-25	CM004494.1_chromosome_B4	24791691	3.6593e-29
5847375	2		46.3139	0.1323	-0.878441	228	0.738557		TGCAGCAAAAAGTTCATATGCGTTTAC		999		0	999		0	999		0	999		0	0	999		0	999
5847546	2		46.8868	0.287453	-0.541433	228	0.367979		TGCAGACCTCATCAGCAGGTAACTAACTACCTGTTAC	5847546	3.6609e-13	LFQT01008375.1_Scaffold03332	4478	5.54939e-11		0	999		0	999		0	0	999	CM004494.1_chromosome_B4	24015236	2.51719e-11
5845369	2		46.8868	0.513404	-0.289541	228	0.138688		TGCAGAATCCTATTTTACTGGAGTTTCTTTTTTAC	5845369	4.20948e-12		0	999		0	999		0	999		0	0	999		0	999
5859157	2		48.2336	0.335875	-0.473822	228	0.301044		TGCAGTACCACCCAATAAAGTAAATAGCCAAGTAGATTGTGTTAC	5859157	1.78173e-17		0	999		0	999		0	999		0	0	999		0	999
5838893	2		48.2336	0.574426	-0.240766	228	0.102364		TGCAGACTCAAGTTTTTGACCCATTCAGTATACTTGGATTGGAACCTGGAGTTTCAGATTCAGAAATTA	5838893	1.52834e-30	CM007191.1_chromosome_A7	20795502	1.09887e-27	C6	15624680	5.7431e-28	NC_027753.1_chromosome_C6	24197728	5.74701e-28	chrC06	21325299	4	9.78776e-28	CM004494.1_chromosome_B4	23938833	3.6593e-29
5861520	2		48.5611	0.47695	-0.321528	228	0.164273		TGCAGTGGAAGAAGCCAAGGCAGATATAGTTGGTCTTTGGGCACTAAAATTTCTCATCACCAAGGTCTC	5861520	1.52834e-30	CM007202.1_chromosome_B8	20307492	8.55507e-24	C6	367123	1.60813e-23	NC_027753.1_chromosome_C6	39455285	1.60923e-23	chrA07	23726808	3	7.62012e-24	CM004494.1_chromosome_B4	32557417	3.68528e-24
5862307|F|0--27:A>G	2		48.907	0.471153	-0.326838	228	0.168643		TGCAGCGTTACCGGCGTTGTTCTCTTCAATGAAGCTAATGGTAGAGTTAC	5862307	3.55254e-20		0	999	C6	15234391	1.21905e-12	NC_027753.1_chromosome_C6	24588036	1.21988e-12	chrC06	21673064	1	4.56696e-14	CM004494.1_chromosome_B4	23709494	2.77394e-18
5855731	2		48.907	0.631278	-0.199779	228	0.0747565		TGCAGTTTTTGTTTGTGTTTTCCAAACTGATAATTTTCTCTCGATTTTTTTCCTTTTTCTGTTGTTATT		999		0	999		0	999		0	999		0	0	999		0	999
5833796	2		49.1315	0.249342	-0.603204	228	0.431736		TGCAGGTTCAGAGAAGTTTGGAGGATCAGTCTGTGTTGGTAGCAACTTACGAGGGTGAACATAACCATC	5833796	1.52834e-30	CM007191.1_chromosome_A7	21078812	3.95223e-27		0	999		0	999		0	0	999	CM004494.1_chromosome_B4	23642088	2.20233e-26
5855730	2		49.1315	0.37534	-0.425575	228	0.25539		TGCAGTTTTTGTTTGTGTTTTCAAAACTGATAATTTTCTCTCGATTTTTTTCTTTTTTCTGTTGTTATT		999		0	999		0	999		0	999		0	0	999		0	999
4112554	2		49.2437	0.12414	-0.906087	228	0.770997		TGCAGAAGGAACAACCACCAACGGAGACTACTTGCTTCAATTCAAGACAGGTGCATTTCTGGCCGGAAC	4112554	7.11069e-29	CM007198.1_chromosome_B4	19049946	1.83879e-25	C6	354199	4.47121e-24	NC_027753.1_chromosome_C6	24725976	4.47425e-24	chrC06	21819226	3	7.62012e-24	CM004494.1_chromosome_B4	23615906	3.68528e-24
5030021|F|0--33:A>G	2		49.2437	0.143541	-0.843025	228	0.697373		TGCAGAAGGAACAACCACCAACGGAGACTACTTACTTACATTCAAGACAGGTGCATTTTTGGCTGGAAC	5030021	7.11069e-29	CM007202.1_chromosome_B8	20338546	3.95223e-27	C6	354199	9.61023e-26	NC_027753.1_chromosome_C6	39468209	9.61678e-26	chrA07	23741522	2	3.52031e-27	CM004494.1_chromosome_B4	32569925	7.921e-26
5847103	2		49.2437	0.240076	-0.619652	228	0.449086		TGCAGAAACAGAAACATCACAGACAACTTTAC	5847103	1.59127e-10		0	999		0	999		0	999		0	0	999		0	999
5850420|F|0--7:A>T	2		49.2437	0.37989	-0.420342	228	0.250555		TGCAGACACTTCTTTGACATCCTGCATCATGTCTTCCTCATTATCAGAAGCTGCATAACTCAAACGTTC	5850420	1.52834e-30	CM007191.1_chromosome_A7	21000583	3.95223e-27	C6	15228232	2.06558e-27	NC_027753.1_chromosome_C6	24594176	2.06699e-27	chrA07	15832576	2	7.62012e-24	CM004494.1_chromosome_B4	23703255	1.70251e-27
5846947	2		49.2437	0.533693	-0.272708	228	0.125764		TGCAGCCGCTTTGATGGCCGGTCTAGCCCCCAAAACCAAAGTAAGTTTTAC	5846947	1.02066e-20	CM007198.1_chromosome_B4	19147992	1.83111e-18		0	999		0	999	chrA07	15826432	1	1.63099e-18	CM004494.1_chromosome_B4	23709541	1.03606e-17
5816411|F|0--34:C>G	2		49.2437	0.716336	-0.144884	228	0.0428427		TGCAGAAGTTGATACAGAAGCTCTTCCACTTATCCGAAGAGCAGAGTTCAGTTGCTGGCTCCAAGAGTG	14788618	7.11069e-29	CM007198.1_chromosome_B4	19141745	3.95223e-27	C6	15228166	9.61023e-26	NC_027753.1_chromosome_C6	24594242	9.61678e-26	chrA07	15832642	4	3.52031e-27	CM004494.1_chromosome_B4	23703189	3.6593e-29
5847253	2		49.2437	0.749081	-0.125471	228	0.0331946		TGCAGGTACTGCAACGGAACATTCTCCATGGATTAC	5847253	1.24354e-12	CM007191.1_chromosome_A7	21100792	1.84238e-10		0	999		0	999		0	0	999		0	999
5853730|F|0--27:C>T	2		49.2437	0.996087	-0.00170265	228	7.8e-06		TGCAGGCAGCTACATATAATGCATCCACCAACTTATGCAAGAACCGAATCCTAGATGATTTGCTCACTG	5853730	1.52834e-30	CM007191.1_chromosome_A7	21102542	8.49476e-29		0	999		0	999		0	0	999	CM004494.1_chromosome_B4	23623060	1.70251e-27
5846172	2		49.5804	0.538592	-0.26874	228	0.122774		TGCAGTGTAATAGATGCTCAGTTCTTTTTATTTTTTTGTCTCATTTGGATTAC		999		0	999		0	999		0	999		0	0	999		0	999
5862202	2		49.5804	0.601112	-0.221045	228	0.0887181		TGCAGCAATGTGAAATGGTGACCACTTTATCACTCCAGGCAGCTCATTAC	5862202	3.55254e-20	CM007198.1_chromosome_B4	19442096	6.33253e-18	C1	25097685	7.28506e-15	NC_027748.1_chromosome_C1	25097685	7.29003e-15	chrCnn_random	11149479	5	5.86609e-18	CM004498.1_chromosome_B8	36812462	2.77394e-18
5845931	2		49.5804	0.684546	-0.164598	228	0.0535622		TGCAGGGAAATTCATCATCGTTTGTTTTGATGTTCGGTCGGAGAAGTTCAGTTTTGTTAC	5845931	1.3077e-25	CM007197.1_chromosome_B3	15482725	1.13875e-21		0	999		0	999		0	0	999	CM004494.1_chromosome_B4	23219871	1.06037e-23
5860476	2		49.5816	0.940335	-0.0267172	228	0.00181737		TGCAGCGTTCACCGTCTTGTTCAGCGTCTTGCTTCACCACTCTGCTTCGAATTTGCTTCTGTTTCTCAC	5860476	1.52834e-30	CM007191.1_chromosome_A7	20973313	1.83879e-25	C6	15300340	4.47121e-24	NC_027753.1_chromosome_C6	24522068	4.47425e-24	chrC06	21566902	2	7.62012e-24	CM004494.1_chromosome_B4	23743735	3.68528e-24
5837979	2		49.9217	0.638747	-0.194671	228	0.0715266		TGCAGCCGGAGATGCAGGATATGTCTATGTGTAGGAGGACCGAACACTTGGTGGAGTCACCCGCAGGTG	5837979	1.52834e-30	CM007191.1_chromosome_A7	20984816	5.11253e-26		0	999		0	999		0	0	999		0	999
5847652	2		52.2946	0.204972	-0.688305	228	0.523029		TGCAGTCACATTCAATGTAGCTGGAAACCTCAAGGTAACCAAGAAAACCTTAC	5847652	8.39926e-22	CM007191.1_chromosome_A7	21536502	7.14279e-13	C6	14000904	3.7805e-13	NC_027753.1_chromosome_C6	25821520	3.78307e-13	chrA07	16296248	2	6.36218e-13	CM004494.1_chromosome_B4	22818169	6.65015e-20
5844852	2		52.2946	0.394594	-0.403849	228	0.235479		TGCAGTGTAATAGATGCTCAGTTCTTTTTATTTTTTGTCTCATTTGGATTAC		999		0	999		0	999		0	999		0	0	999		0	999
5838873	2		52.2946	0.56895	-0.244926	228	0.105323		TGCAGAACCATGCGAATCTTCTTTGTGTCGTTCCAATTTTATCGAATGTCTTACATGATAAAAGAAAAT	5838873	1.52834e-30		0	999		0	999		0	999		0	0	999	CM004494.1_chromosome_B4	22753853	7.921e-26
5850197	2		52.2946	0.600535	-0.221461	228	0.0889997		TGCAGACAACTCTGGGCCGTGTTACTATCCAAATCGACAAAGTCGTGACAGAAGGAGTTTACAACGGAT	5850197	1.52834e-30	CM007197.1_chromosome_B3	15111477	8.49476e-29		0	999		0	999		0	0	999	CM004494.1_chromosome_B4	22778600	3.6593e-29
19818880	2		52.2946	0.667257	-0.175707	228	0.0599818		TGCAGGTTTGAGCGGGACGGATGCAGGTTTAC	19818880	1.59127e-10		0	999		0	999		0	999		0	0	999		0	999
5852835	2		52.2946	0.679528	-0.167793	228	0.0553814		TGCAGCTAGAAACAAAGACTGATCCTGATGACACCAAGAAAAAAAAAATACAATGCCAAACCTCATCAT	5852835	1.52834e-30		0	999		0	999		0	999		0	0	999		0	999
5854815	2		52.2946	0.711631	-0.147745	228	0.0443431		TGCAGTCCATGGTCAAGTTTATTTGGTCTCTATGCACCTTATGGCTGCTGAGCAATCATGCACTAAGAA	5854815	1.52834e-30		0	999		0	999		0	999	chrC04_random	2891351	1	1.63784e-25		0	999
5856966	2		52.2946	0.786776	-0.104149	228	0.0237398		TGCAGACTCTACGGAAGAGTCGTTCGCCAATTTTATGAGTGCCTTAC	5856966	1.48755e-18	LFQT01009255.1_Scaffold08123	436	2.71057e-16		0	999		0	999		0	0	999	CM004494.1_chromosome_B4	22773856	1.19132e-16
5855344|F|0--31:G>A	2		52.2946	0.879108	-0.0559579	228	0.00750511		TGCAGTTATGTGGCATCCAGAAAGTTATGATGTGCGAAAATGCAACCCAAGTATGAACTGAAGGTCTTT	5855344	1.52834e-30	CM007197.1_chromosome_B3	15052384	1.83879e-25		0	999		0	999		0	0	999	CM004494.1_chromosome_B4	22721032	1.70251e-27
5855343	2		52.2946	0.922231	-0.0351602	228	0.00309167		TGCAGTTATGTGGCATCCAGAAAGTTATGATATGAGAAAATGCAACCCAAGTATGAACTGAAGGTCTTT	5855343	1.52834e-30	CM007197.1_chromosome_B3	15052384	8.49476e-29		0	999		0	999		0	0	999	CM004494.1_chromosome_B4	22721032	1.70251e-27
5855344	2		52.2946	0.923525	-0.0345512	228	0.00298931		TGCAGTTATGTGGCATCCAGAAAGTTATGATGTGCGAAAATGCAACCCAAGTATGAACTGAAGGTCTTT	5855344	1.52834e-30	CM007197.1_chromosome_B3	15052384	1.83879e-25		0	999		0	999		0	0	999	CM004494.1_chromosome_B4	22721032	1.70251e-27
5853516|F|0--32:A>C	2		52.2946	0.964278	-0.0157977	228	0.000650661		TGCAGGAGAAGCAGCATGAACTTGAAATGGGAAGCTGTGAAGAAGAGTAAAGAAGACGATCGACAGAGC	5853516	1.52834e-30	CM007195.1_chromosome_B1	26650107	1.11453e-17	C3	26065732	1.25199e-19	NC_027750.1_chromosome_C3	26065732	1.25284e-19	chrA03	16280533	2	2.13372e-19	CM004494.1_chromosome_B4	22833782	3.6593e-29
5858862|F|0--16:G>A	2		52.2946	0.976633	-0.0102686	228	0.000278309		TGCAGTTTTATTCGAAGAAAACATAGGTAAAGACTGTAAAACTTTAC	5858862	1.48755e-18	CM007197.1_chromosome_B3	15569442	2.71057e-16		0	999		0	999		0	0	999	CM004497.1_chromosome_B7	32778187	5.54268e-15
14787008	2		52.968	0.0897927	-1.04676	228	0.939618		TGCAGAGGGTTCCACCACTTTGAACCATCTACAGATGGGAGATCAGTTAGATACATAGCTTACTCTATT	14787008	1.52834e-30	LFQT01000207.1_Scaffold00838	28433	8.49476e-29	C6	12910840	9.61023e-26	NC_027753.1_chromosome_C6	26911568	9.61678e-26	chrC06	24496710	2	1.63784e-25	CM004493.1_chromosome_B3	9199940	3.6593e-29
5846539	2		52.968	0.284316	-0.546199	228	0.372814		TGCAGCCCGTGGCATCCTCCAACGGACTGATCTACCTCTGGGGCGACTCGGTTAC	5846539	6.88654e-23	CM007198.1_chromosome_B4	15135789	1.26262e-20		0	999		0	999		0	0	999	LFLV01002130.1scaffold_240.1	340160	9.19579e-19
5837190	2		52.968	0.491309	-0.308645	228	0.153813		TGCAGATTGGTTACTGTTGTAGATGACTCACTCAAATGCTTGGTATGCATGAGGACAATTAC	5837190	1.06146e-26	CM007198.1_chromosome_B4	15139048	2.00021e-24		0	999		0	999		0	0	999	CM004495.1_chromosome_B5	22080997	8.65256e-25
5846511	2		52.968	0.536229	-0.27065	228	0.12421		TGCAGCAGCAGCGGCAACAAGAAGAACATGGCTTAC	5846511	1.24354e-12	CM007197.1_chromosome_B3	15007934	1.84238e-10		0	999		0	999		0	0	999	CM004494.1_chromosome_B4	22684160	3.0236e-10
5849637|F|0--28:C>T	2		53.6414	0.594304	-0.225992	228	0.0920801		TGCAGAAATGATTGCGAGATCATGGAAACAGTCTATGATATACCATCTCCTTGCCATGATTTTCATACA	5849637	1.52834e-30	CM007197.1_chromosome_B3	15079052	8.49476e-29		0	999		0	999	chrA07	16374974	1	4.65148e-11	CM004494.1_chromosome_B4	22741791	3.6593e-29
5857941	2		53.9792	0.735983	-0.133132	228	0.0368895		TGCAGCTGTTCCTGCTGATTACCTTTGATTATTTGTTTCCACTTATAATAATTTAC	5857941	1.96942e-23	CM007199.1_chromosome_B5	32448098	3.62758e-21	C6	13589876	4.14217e-18	NC_027753.1_chromosome_C6	26232545	4.145e-18	chrC06	21100409	1	6.99419e-18	LFLV01002130.1scaffold_240.1	316980	1.57722e-21
5844298	2		54.3182	0.947085	-0.0236109	228	0.00142886		TGCAGGTTGCTGTAATTGCAGTTTCTATCAAATTTTTTGTTTATTAGAAGTTAC	5844298	2.40607e-22		0	999		0	999		0	999		0	0	999		0	999
5865017|F|0--15:T>C	2		57.0301	0.651832	-0.185864	228	0.0660761		TGCAGAGATATCTGGTGCTGCAATTGGCAAAGGAAAACAAGCTGCTGAAATGTAAGGTTTTGTGTTACA	5865017	1.52834e-30	LFQT01000567.1_Scaffold00505	39447	1.10667e-22	C6	8661239	3.48099e-20	NC_027753.1_chromosome_C6	31161169	3.48337e-20	chrC06	28216196	2	5.93254e-20	CM004494.1_chromosome_B4	22607799	1.02465e-24
5865019	2		57.0301	0.73885	-0.131444	228	0.0360621		TGCAGAGATATCTGGCGCTGCAATTGGCAAAGGAAAACAAGCTGCTAAAATGTAAGGTTTTGTGTTACA	5865019	1.52834e-30	LFQT01000567.1_Scaffold00505	39447	1.10667e-22	C6	8661239	3.48099e-20	NC_027753.1_chromosome_C6	31161169	3.48337e-20	chrC06	28216196	2	5.93254e-20	CM004494.1_chromosome_B4	22607799	4.73361e-28
5845533	2		57.3668	0.243466	-0.613562	228	0.442644		TGCAGATCCTGTCCATGTTTCCGGCATCCCTGCTCCCCCGGTTAC	5845533	1.78173e-17		0	999		0	999		0	999		0	0	999	CM004493.1_chromosome_B3	8766931	1.41265e-15
5858219	2		57.3668	0.245994	-0.609076	228	0.437912		TGCAGGGGTATCTATGTAAATTTTTAGAAGCTGTGTGTTTTCTTTAC	5858219	1.48755e-18		0	999		0	999		0	999		0	0	999	CM004494.1_chromosome_B4	22477621	5.54268e-15
5845892	2		57.3668	0.260177	-0.584732	228	0.412431		TGCAGGATCTCAATATGATTTCTGTAGTCGCTACTTTGCTCCCAACTTTGGAATTAC	5845892	5.62783e-24	CM007198.1_chromosome_B4	12676997	4.84395e-20	C5	901550	1.53635e-17	NC_027752.1_chromosome_C5	901550	1.53739e-17	chrA10	881999	2	2.00738e-18	CM004494.1_chromosome_B4	22564399	2.74105e-14
5858807	2		57.3668	0.266366	-0.574522	228	0.401846		TGCAGTTGTAATATCGTCCCTATCTGTCGAAAAAACTTCATCAGCTTACTTAC	5858807	8.39926e-22	CM007196.1_chromosome_B2	55030026	3.29979e-16		0	999		0	999		0	0	999		0	999
5851831	2		57.3668	0.344607	-0.462676	228	0.29033		TGCAGCAATGGATAAACAGATCATAAAATTAGAATTTGGTAACAAACACAGCTACTAAGAATCAATTAT	5851831	1.52834e-30	CM007198.1_chromosome_B4	12164594	3.95223e-27		0	999		0	999		0	0	999		0	999
5860769	2		57.3668	0.379453	-0.420841	228	0.251015		TGCAGCTTTGCGACAACAACAACTTCGTTTTCGAACTCTCTTTTACCTTGTCCTGATGTATTCGATAGC	5860769	1.52834e-30	CM007185.1_chromosome_A1	15880253	8.55507e-24	C1	10521438	2.08025e-22	NC_027748.1_chromosome_C1	10521438	2.08167e-22	chrC01	10061379	4	7.62012e-24	CM004494.1_chromosome_B4	22363255	3.6593e-29
5845524	2		57.3668	0.381362	-0.418663	228	0.249009		TGCAGATCAGGGATTTTGTGTATAATCTTGTGAAGTAAGCAAACACATTTAC	5845524	2.92937e-21	CM007198.1_chromosome_B4	12825236	1.49092e-09	C6	12342215	7.90115e-10	NC_027753.1_chromosome_C6	27480210	7.90654e-10	chrA07	17096404	1	1.32799e-09	CM004493.1_chromosome_B3	8775629	8.30588e-19
5865017|F|0--11:C>T	2		57.3668	0.41521	-0.381732	228	0.215661		TGCAGAGATATCTGGTGCTGCAATTGGCAAAGGAAAACAAGCTGCTGAAATGTAAGGTTTTGTGTTACA	5865017	1.52834e-30	LFQT01000567.1_Scaffold00505	39447	1.10667e-22	C6	8661239	3.48099e-20	NC_027753.1_chromosome_C6	31161169	3.48337e-20	chrC06	28216196	2	5.93254e-20	CM004494.1_chromosome_B4	22607799	1.02465e-24
5865017	2		57.3668	0.558423	-0.253037	228	0.111171		TGCAGAGATATCTGGTGCTGCAATTGGCAAAGGAAAACAAGCTGCTGAAATGTAAGGTTTTGTGTTACA	5865017	1.52834e-30	LFQT01000567.1_Scaffold00505	39447	1.10667e-22	C6	8661239	3.48099e-20	NC_027753.1_chromosome_C6	31161169	3.48337e-20	chrC06	28216196	2	5.93254e-20	CM004494.1_chromosome_B4	22607799	1.02465e-24
5858637	2		57.3668	0.57351	-0.241459	228	0.102855		TGCAGTGGACAATGAAAGAGAGAAATATATAAGCTTTAC	5858637	3.1445e-14	CM007198.1_chromosome_B4	12327213	4.94993e-12		0	999		0	999		0	0	999	CM004494.1_chromosome_B4	22199008	2.22389e-12
5834512	2		57.3668	0.596663	-0.224271	228	0.0909061		TGCAGTGGAAATTTTGTTTGTTATCTTCATCAACTATACTCAACTGCAATCACCATAATTAC	5834512	1.06146e-26		0	999		0	999		0	999		0	0	999	CM004494.1_chromosome_B4	22524305	4.05423e-18
5833101	2		57.3668	0.598595	-0.222867	228	0.0899517		TGCAGGAAGTTCCAGAAAAGAAAAGTAAGCTAGGGAATTGCGTGCAGGAAAAGAGAATTTAC	5833101	1.06146e-26	CM007197.1_chromosome_B3	14342789	1.20382e-21		0	999		0	999		0	0	999	CM004494.1_chromosome_B4	22356761	4.02565e-23
5843159	2		57.3668	0.620383	-0.20734	228	0.0796268		TGCAGCCACTGAATCTGCACTTGTCACATCATCTTTAC	5843159	1.07441e-13		0	999		0	999		0	999		0	0	999	CM004494.1_chromosome_B4	22530185	1.25479e-09
5857926	2		57.3668	0.80033	-0.0967307	228	0.0207539		TGCAGCTGGTAGGTGTTCGTGTTACATCTTGTCTTATTCTCGTACATGTTAC	5857926	2.92937e-21	CM007198.1_chromosome_B4	12329781	5.28698e-19		0	999		0	999		0	0	999		0	999
5832712	2		57.3668	0.830114	-0.0808625	228	0.0149348		TGCAGCTCTGAAGTAAACATCCTTGATTCTTGTCTCAACTCTATTTGTGGTTTCTTCTCCGTTAC	5832712	2.44442e-28	CM007198.1_chromosome_B4	12643785	4.64776e-26		0	999		0	999	chrA10	907721	1	1.93975e-19	CM004494.1_chromosome_B4	22530856	2.00657e-26
5834627	2		57.3668	0.882117	-0.0544737	228	0.00713337		TGCAGTGTGATCTTTCAATGTATGTCTACAGGCATAGTTCCCATCCTCTGAACTCCCCCAGATACGGAC	5834627	1.52834e-30	CM007198.1_chromosome_B4	12151728	8.49476e-29		0	999		0	999	chrA08	18463411	1	1.63784e-25	CM004494.1_chromosome_B4	22056317	3.6593e-29
4121330	2		57.3668	0.902959	-0.0443321	228	0.00482248		TGCAGCAGCTGCTACATGGAGAGGAAGGTCTCCACTGGAGTTTGGTCTTAC	5839860	3.67096e-20	CM007198.1_chromosome_B4	12505397	8.51931e-17		0	999		0	999	chrAnn_random	40713897	1	7.58827e-17	CM004494.1_chromosome_B4	22425741	8.00924e-19
5850571|F|0--68:A>C	2		57.3668	0.337835	-0.471296	228	0.298607		TGCAGAGACCAACTAAGCAGATAAAGCACGCTCGAGGGTATTTTGGTCAGGATAATGACTTTGACTGGA	5850571	1.52834e-30	CM007198.1_chromosome_B4	12651792	3.95223e-27		0	999		0	999		0	0	999	CM004494.1_chromosome_B4	22535159	1.72677e-17
3093872|F|0--10:T>C	2		57.3668	0.382126	-0.417794	228	0.24821		TGCAGCTCACTTTGGGTTATCCAAGTCATACATATGGTTCTTAC	3199387	6.15192e-17	LFQT01006983.1_Scaffold03463	3439	5.10204e-13	C8	786733	9.3773e-13	NC_027755.1_chromosome_C8	786733	9.38369e-13	chrC02	17325316	3	9.76758e-15	CM004491.1_chromosome_B1	21711779	2.25641e-13
5842497	2		57.3668	0.403236	-0.39444	228	0.226991		TGCAGATCAGGGATTTTGTGTATTATCTTGTGAAGTAAGCAAACACATTTGACCTTTAC	5842497	4.58575e-25	CM007198.1_chromosome_B4	12809614	8.55153e-23	C6	12342208	7.63496e-11	NC_027753.1_chromosome_C6	27480210	7.64016e-11	chrA07	17096404	1	1.67228e-09	CM004493.1_chromosome_B3	8775622	1.72509e-21
5845429	2		57.3668	0.414385	-0.382596	228	0.216427		TGCAGAGAAAAAAAAAAGGTTTGTTTGCCTGAATGATTTGTTAGTCTGTATGTTAC	5845429	1.96942e-23	CM007198.1_chromosome_B4	12637330	3.62758e-21		0	999		0	999		0	0	999		0	999
5863003	2		57.3668	0.837894	-0.0768111	228	0.0135793		TGCAGATCATCACCCAAGCAGAAGGCATTGGTAATACTAATGTCACGTATATGCGTTTATTGAGTTTTA	5863003	1.52834e-30		0	999		0	999		0	999		0	0	999		0	999
5857155|F|0--11:G>A	2		57.3668	0.853909	-0.0685886	228	0.0109995		TGCAGAGTTTCGTAAGCCCCCTGATTGTAGTTTTTAC	5857155	3.6609e-13		0	999		0	999		0	999		0	0	999		0	999
5858220	2		57.7035	0.0805319	-1.09403	228	0.997483		TGCAGGGGTGTCTATGTAAATTTATAGAAGCTGTGTGTTTCCTTTAC	5858220	1.48755e-18	CM007198.1_chromosome_B4	12603526	2.71057e-16		0	999		0	999		0	0	999		0	999
5858138|F|0--26:G>T	2		57.7035	0.218917	-0.659721	228	0.491956		TGCAGGCCATGCACAGGCTGTGATCCGCCTTATTAC	5858138	1.24354e-12		0	999		0	999		0	999		0	0	999		0	999
3142138|F|0--18:G>A	2		57.7035	0.237274	-0.624749	228	0.454493		TGCAGTCATCTCATGGAGGAAAGTCAATGGACCTTAC	3215172	3.6609e-13	CM007194.1_chromosome_A10	2055536	5.54939e-11	C5	1037995	1.42098e-09	NC_027752.1_chromosome_C5	1037995	1.42194e-09	chrA10	1135603	1	4.94287e-11		0	999
5839860	2		57.7035	0.274651	-0.561218	228	0.388148		TGCAGCAGCTGCTACATGGAGAGGAAGGTCTCCACTGGAGTTTGGTCTTATTGAATGTAAAGAACTGAT	5839860	1.52834e-30	CM007198.1_chromosome_B4	12505379	1.44173e-16		0	999		0	999	chrAnn_random	40713897	1	1.28417e-16	CM004494.1_chromosome_B4	22425723	1.33487e-18
5863891	2		57.7035	0.294705	-0.530612	228	0.357054		TGCAGCTCACCTTGGGTTATCCAAGCCATACATTTGGTTCTTAC	5863891	6.15192e-17	CM007201.1_chromosome_B7	2611628	1.41856e-13		0	999		0	999		0	0	999	LFLV01000557.1scaffold_351.1	176908	6.27367e-14
5858220|F|0--9:G>A	2		57.7035	0.368044	-0.4341	228	0.263316		TGCAGGGGTGTCTATGTAAATTTATAGAAGCTGTGTGTTTCCTTTAC	5858220	1.48755e-18	CM007198.1_chromosome_B4	12603526	2.71057e-16		0	999		0	999		0	0	999		0	999
5830681	2		57.7035	0.381191	-0.418857	228	0.249188		TGCAGAGAAAAAAAAAGGTTAGTTTGCCTGAATGATTTGTCAGTCTGTATGTCAAATCTAAACTGCATC	5830681	1.52834e-30		0	999		0	999		0	999		0	0	999	CM004494.1_chromosome_B4	22524380	3.6593e-29
5858137	2		57.7035	0.631316	-0.199753	228	0.0747401		TGCAGGCCATGCACAGGCTGTGATCCTTCTTATTAC	5858137	1.24354e-12	CM007198.1_chromosome_B4	12505445	1.84238e-10		0	999		0	999		0	0	999	CM004494.1_chromosome_B4	22425789	8.40674e-11
5858138	2		57.7035	0.699003	-0.155521	228	0.0485168		TGCAGGCCATGCACAGGCTGTGATCCGCCTTATTAC	5858138	1.24354e-12		0	999		0	999		0	999		0	0	999		0	999
19818922	2		57.7035	0.704226	-0.152288	228	0.0467644		TGCAGGATGAAAAGAAACGTATAACTGGCAGTTTTTGTGACATGCTCTTTTAGCAACGTCAGACAGGAG	19818922	1.52834e-30	CM007200.1_chromosome_B6	4540335	3.95223e-27		0	999		0	999		0	0	999	LFLV01002062.1scaffold_334.1	32964	1.70251e-27
5860781	2		57.7035	0.789697	-0.102539	228	0.0230781		TGCAGGAAAAAAAATGATCTTACTAAAATGTTACTTTCGAATGTTCTCTGTTCAGGTACTGTTGAAGTT	5860781	1.52834e-30	CM007197.1_chromosome_B3	14342848	8.55507e-24		0	999		0	999		0	0	999	CM004494.1_chromosome_B4	22356820	3.6593e-29
5851695|F|0--13:T>C	2		59.0503	0.428597	-0.367951	228	0.203556		TGCAGCAAATGTGTAATCATCTCAGCTGCTCACTCTACTCAGTCTACTCAGTCTTCCCAATCTCAAGAA	5851695	1.52834e-30	CM007199.1_chromosome_B5	2158320	1.83879e-25		0	999		0	999		0	0	999	CM004497.1_chromosome_B7	37745021	1.70251e-27
5858636	2		59.0503	0.284969	-0.545202	228	0.371802		TGCAGTGAACAATGGAAGAGAGAAATATATAAGCTTTAC	5858636	3.1445e-14		0	999		0	999		0	999		0	0	999		0	999
5847539	2		59.0503	0.395309	-0.403063	228	0.234767		TGCAGAATTATCTATAGCAAAAATGGAGTTTAC	5847539	4.76465e-11		0	999		0	999		0	999		0	0	999		0	999
19818994	2		59.0503	0.473208	-0.324948	228	0.167084		TGCAGTCTGGTTTCTTTCACAGTTTTATTGGCAAGATATCTTTAC	19818994	1.78173e-17		0	999		0	999		0	999		0	0	999		0	999
5845623	2		59.0503	0.695852	-0.157483	228	0.0495917		TGCAGCAATAAAATCAAACTTGTACAGTCTCAGAACTGAATGACTCAGAAGCATTTAC	5845623	1.60704e-24	CM007198.1_chromosome_B4	12149473	3.86162e-21		0	999		0	999	chrA10	1404258	1	4.48099e-15	CM004494.1_chromosome_B4	22048997	1.29547e-22
5850722	2		59.7237	0.963864	-0.0159842	228	0.000665839		TGCAGAGCATCTGAAGCAGCACCTTTGACTTACAATGTCTAGCCAATGTTTTCAGCTTTTTCAGCGTCG	5850722	1.52834e-30	LFQT01005724.1_Scaffold01633	7243	8.49476e-29		0	999		0	999		0	0	999	CM004494.1_chromosome_B4	22090553	7.921e-26
5836731	2		60.0604	0.149382	-0.825702	228	0.677387		TGCAGTGGATAAGCTGAGAGGTCTTCAAACAGAAGAAACCAACTAAAGATCAAATGTTTCTGATGGTAT	5836731	1.52834e-30	CM007198.1_chromosome_B4	12004247	8.55507e-24		0	999		0	999		0	0	999	CM004494.1_chromosome_B4	21912065	3.68528e-24
5845894	2		60.0604	0.348167	-0.458212	228	0.286066		TGCAGGATCTTCCGAAACAAGAAGTGTTCTTGTTAC	5845894	1.24354e-12	CM007198.1_chromosome_B4	12004841	1.84238e-10		0	999		0	999		0	0	999		0	999
5855648	2		60.0604	0.377227	-0.423397	228	0.253374		TGCAGTTTGTACTGCTTAGTTAGTCGCTAAAAATCAGAAACGTACAAACCAACATCACCTAGACGGTTT	5855648	1.52834e-30		0	999		0	999		0	999		0	0	999	CM004494.1_chromosome_B4	22551007	1.70251e-27
5860314	2		60.0604	0.276882	-0.557705	228	0.384548		TGCAGCCCCATTTCTCTATGTGCATGCTTCTCATTCTTCCGTTCTAGTTTGTTAGGCTTGATTCAACCT	5860314	1.52834e-30	CM007198.1_chromosome_B4	12046573	3.98029e-22	C5	1470047	2.08025e-22	NC_027752.1_chromosome_C5	1470047	2.08167e-22	chrC05	1350948	1	7.62012e-24	CM004494.1_chromosome_B4	21951094	1.70251e-27
5863839	2		60.0604	0.277241	-0.557143	228	0.383974		TGCAGTGATGGATTCATTCTGATCCTCGGAACTAGCTTGCAAGACCTTCAACGTTAC	5863839	5.62783e-24	CM007198.1_chromosome_B4	12045690	4.84395e-20	C5	1470922	5.52569e-17	NC_027752.1_chromosome_C5	1470922	5.52945e-17	chrA10	1492538	2	4.31457e-20	CM004494.1_chromosome_B4	21950211	9.78907e-19
5853949	2		60.0604	0.393416	-0.405148	228	0.236657		TGCAGGGCATTCGTTTCAGCGTCGAGGCCCTTACAAGTAAGAACCAATGGATATATGCTCTCAACTAAC	5853949	1.52834e-30	CM007198.1_chromosome_B4	12076986	3.95223e-27		0	999		0	999		0	0	999	CM004494.1_chromosome_B4	21978423	1.70251e-27
5834526	2		60.0604	0.428916	-0.367628	228	0.203274		TGCAGTGGATAAGCTAAGAGGTCTTCAAACAGTAGAAGACCAACTAAAGATCAAATGTTTCTGATGGTA	5834526	1.52834e-30	CM007198.1_chromosome_B4	12004247	8.49476e-29		0	999		0	999		0	0	999	CM004494.1_chromosome_B4	21912065	3.6593e-29
5842961	2		60.0604	0.601279	-0.220924	228	0.0886364		TGCAGCAGAGGTAATGAGAATCATTTCGGTAAGGAATGATAACATGGATATTAC	5842961	2.40607e-22		0	999		0	999		0	999		0	0	999	CM004494.1_chromosome_B4	21951043	1.91275e-20
5836415	2		62.0874	0.54357	-0.264745	228	0.119788		TGCAGGTCAGAGCCCCGAGGTTGACATGGAAACTAACTCCACTCTTGTTGCGTGCTTCATACTCCTTCT	5836415	1.52834e-30	CM007198.1_chromosome_B4	17294381	5.11253e-26		0	999		0	999		0	0	999	CM004494.1_chromosome_B4	20503672	2.20233e-26
5836218	2		62.0874	0.591524	-0.228028	228	0.0934759		TGCAGGAAGCTTCCAAAGAAAATGTTGTGACACGACAAGCAATCAAAAACGAATGCAGCTGAGCTATTT	5836218	1.52834e-30	CM007198.1_chromosome_B4	17299362	8.49476e-29	C5	2773564	5.82493e-18	NC_027752.1_chromosome_C5	2773564	5.82891e-18	chrCnn_random	71722162	1	4.61869e-16	CM004494.1_chromosome_B4	20498675	4.73361e-28
5862504|F|0--48:C>T	2		63.4274	0.523401	-0.281166	228	0.132209		TGCAGGTATCATCAACTTCTTCTCTATACTTTTCAATAGATTGTTTGTCTCTCTTAC	5862504	5.62783e-24	CM007198.1_chromosome_B4	17431419	4.84395e-20		0	999		0	999		0	0	999	CM004494.1_chromosome_B4	20702236	4.5223e-22
5842719	2		63.7641	0.557663	-0.253628	228	0.111601		TGCAGATTTCAAAATCATGACTTATGATGTGATTTTTAC	5842719	3.1445e-14		0	999		0	999		0	999		0	0	999	CM004494.1_chromosome_B4	20716881	2.22389e-12
5843124	2		63.7641	0.804542	-0.0944513	228	0.0198696		TGCAGCCAAAGTTGCCACGTCCGGAAATCAGAAAGAGGAAGAAGAAGCTGTACTCGTTAC	5843124	1.3077e-25	CM007198.1_chromosome_B4	17431471	2.44758e-23		0	999		0	999		0	0	999	CM004494.1_chromosome_B4	20702182	3.84085e-18
5845928	2		64.1008	0.451449	-0.345391	228	0.184167		TGCAGGCTGCATGTGTTCATTCATGTTCAACCTAGTTTTCTGAAAATATTAC	5845928	2.92937e-21	CM007198.1_chromosome_B4	17299427	1.14443e-15		0	999		0	999		0	0	999	CM004494.1_chromosome_B4	20498627	4.99885e-16
5855952	2		64.1008	0.45691	-0.34017	228	0.179758		TGCAGCGCTCCAGAGTGTTCAAATACTAATAAGCAAACTATATAGTTTCAAACCTTTCTACATCAGTTA	5855952	1.52834e-30	CM007198.1_chromosome_B4	17433896	1.85185e-20		0	999		0	999		0	0	999	CM004494.1_chromosome_B4	20699753	3.6593e-29
5845494	2		64.1008	0.489866	-0.309923	228	0.154842		TGCAGAGTCGTTTTGTATGAGACCGATCATGTTTTTTCCATAGGCTGTTTTGTTTAC	5845494	5.62783e-24	LFQT01008573.1_Scaffold00053	431682	8.10564e-18		0	999		0	999		0	0	999	LFLV01000206.1scaffold_1881.1	1337	1.2663e-17
5831501	2		64.1008	0.542293	-0.265766	228	0.120549		TGCAGATTCTCCACTACCTCCAGGGACGCTGAGAATGAAAAGTTGTCCAATACGTAGTATTTGCAGTGA	5831501	1.52834e-30		0	999	C5	2712494	4.47121e-24	NC_027752.1_chromosome_C5	2712494	4.47425e-24		0	0	999	CM004494.1_chromosome_B4	20716917	3.6593e-29
5861348	2		64.1008	0.574414	-0.240775	228	0.10237		TGCAGTTACATCAAACGATAACTTTTTTCATAAGCTCATTTGATCAGAAAAGCTGATATATATTACAGA	5861348	7.11069e-29	CM007198.1_chromosome_B4	17433830	3.07695e-23	C5	2683916	1.63105e-13	NC_027752.1_chromosome_C5	2683916	1.63216e-13	chrC05	2478772	1	2.77974e-13	CM004494.1_chromosome_B4	20699819	6.12331e-27
5845388	2		64.1008	0.585093	-0.232775	228	0.0967574		TGCAGACAACGGAAAAAGTAAACCAACGTGTAACCATAATCTAATTGAGATTAC	5845388	2.40607e-22	CM007198.1_chromosome_B4	17244624	2.642e-17		0	999		0	999		0	0	999	CM004494.1_chromosome_B4	20453267	1.15118e-17
5843214	2		64.1008	0.588415	-0.230316	228	0.0950531		TGCAGCCCTCCAAAGAGTTCAAATATTAC	5843214	5.69496e-09	CM007198.1_chromosome_B4	17433896	7.17188e-07		0	999		0	999		0	0	999		0	999
5855595|F|0--62:A>T	2		64.1008	0.596349	-0.2245	228	0.0910618		TGCAGTTTCCAGCTTCTAGCACTAAGAACTCTTTCCTCCGTAAACTTCACAGGCTCAACAACAACGTGA	5855595	1.52834e-30	CM007198.1_chromosome_B4	17468912	3.95223e-27		0	999		0	999		0	0	999	CM004494.1_chromosome_B4	20668077	3.6593e-29
5863668	2		64.1008	0.652524	-0.185403	228	0.065795		TGCAGTTTTCCCACCCGTACTAACAAACTTCAGTTCCAAATATCAACACACAATATATAAGTCCAGACT	5863668	1.52834e-30	CM007202.1_chromosome_B8	35300750	3.95223e-27	C4	38965508	2.09502e-17	NC_027751.1_chromosome_C4	38965508	2.09645e-17	chrUnn_random	162874	2	1.64947e-20	CM004494.1_chromosome_B4	20531726	3.6593e-29
5853839|F|0--17:A>G	2		64.1008	0.772567	-0.112064	228	0.0271023		TGCAGGCTGAGATTCCAAGAATTTTGTTACTACAGATTTGTCCGCATTTTTCGAATAACAATCTACAGA	5853839	1.52834e-30	CM007198.1_chromosome_B4	16689649	1.83879e-25		0	999		0	999		0	0	999	CM004494.1_chromosome_B4	15331165	7.921e-26
5853840	2		64.1008	0.77267	-0.112006	228	0.0270771		TGCAGGCTGAGATTCCAGGAATTTTGTTACTACAGATTTGTCCGCATTTTTAGAATAACAATCTACAGA	5853840	1.52834e-30	CM007198.1_chromosome_B4	16689649	8.49476e-29		0	999		0	999		0	0	999	CM004494.1_chromosome_B4	15331165	3.6593e-29
5829784	2		64.1008	0.791317	-0.10165	228	0.0227157		TGCAGACAGATAAAGCCTTACGCATGTCACCAGATGCAGCTGCAACTTTCTGGCACAATGCAAATAAAG	5829784	1.52834e-30	CM007198.1_chromosome_B4	17443477	8.49476e-29		0	999		0	999		0	0	999		0	999
5836351	2		64.1008	0.800642	-0.0965617	228	0.0206878		TGCAGGGAACGTTGAAATCAATGACTGCTGTGGAACTTGAAGAGGTTGTTTGCAATGTACCAGCTGATG	5836351	1.52834e-30	CM007198.1_chromosome_B4	17431528	3.95223e-27		0	999		0	999		0	0	999	CM004494.1_chromosome_B4	20702116	3.6593e-29
5853839	2		64.1008	0.815045	-0.0888185	228	0.017753		TGCAGGCTGAGATTCCAAGAATTTTGTTACTACAGATTTGTCCGCATTTTTCGAATAACAATCTACAGA	5853839	1.52834e-30	CM007198.1_chromosome_B4	16689649	1.83879e-25		0	999		0	999		0	0	999	CM004494.1_chromosome_B4	15331165	7.921e-26
5841897	2		64.1008	0.861795	-0.064596	228	0.00983215		TGCAGACAACGGAAAAAAAGTAAACCAACGTGTAACCATAATCTAATTGAGATTAC	5841897	1.96942e-23	CM007198.1_chromosome_B4	17244624	3.62758e-21		0	999		0	999		0	0	999	CM004494.1_chromosome_B4	20453267	1.57722e-21
5857569|F|0--18:G>C	2		64.1008	0.976677	-0.0102491	228	0.000277261		TGCAGCAGCTGCTGCTGCGTCGACTGTTAC	5857569	1.74175e-09		0	999		0	999		0	999		0	0	999		0	999
5845675	2		64.1008	0.990894	-0.00397268	228	4.23e-05		TGCAGCCAAAGTTGTCACGTCCGGAATCACAAAGAGGAAGAAGAAGCTGTACTCGTTAC	5845675	4.58575e-25	CM007198.1_chromosome_B4	17431472	8.61224e-18		0	999		0	999		0	0	999	CM004494.1_chromosome_B4	20702182	3.70783e-23
5861347|F|0--6:C>T	2		64.7742	0.511395	-0.291244	228	0.140017		TGCAGTCACATCAAACGATAACTTTTTTCATAAGCTCATTTGATCAGAAAAACTGATATATATTACAGA	5861347	1.52834e-30	CM007198.1_chromosome_B4	17433830	1.42147e-26	C5	2683916	1.26088e-14	NC_027752.1_chromosome_C5	2683916	1.26174e-14	chrC05	2478772	1	2.14887e-14	CM004494.1_chromosome_B4	20699819	1.32546e-23
5861347	2		64.7742	0.572609	-0.242142	228	0.10334		TGCAGTCACATCAAACGATAACTTTTTTCATAAGCTCATTTGATCAGAAAAACTGATATATATTACAGA	5861347	1.52834e-30	CM007198.1_chromosome_B4	17433830	1.42147e-26	C5	2683916	1.26088e-14	NC_027752.1_chromosome_C5	2683916	1.26174e-14	chrC05	2478772	1	2.14887e-14	CM004494.1_chromosome_B4	20699819	1.32546e-23
5862141|F|0--40:A>G	2		66.121	0.709898	-0.148804	228	0.0449032		TGCAGATGGAAGCCATGATATCTGAGATCATAAAGAGGTCAAGAACTAGTAAATTAGTTAC	5862141	3.72679e-26		0	999		0	999		0	999		0	0	999		0	999
5865683|F|0--9:A>T	2		66.4577	0.305001	-0.515699	228	0.342126		TGCAGCTCCACAAAAAATCGTCTTTAC		999		0	999		0	999		0	999		0	0	999		0	999
5851548	2		67.1311	0.42181	-0.374883	228	0.209621		TGCAGATTGATAGCTGCAGGGAAGTCTTCTGAGTCTCGAACAACAAAGCAGAATGGTACTATGCAGTTT	5851548	1.52834e-30	LFQT01003922.1_Scaffold00110	26576	3.95223e-27		0	999		0	999		0	0	999		0	999
5862332|F|0--24:A>T	2		67.1311	0.428537	-0.368012	228	0.203609		TGCAGCTCAGGTGATGTGATAGATAGTTCTTTTGGTGTGTTATTGGTGTACACTTGTTAC	5862332	6.08414e-24	CM007196.1_chromosome_B2	28488318	1.13875e-21		0	999		0	999		0	0	999	LFLV01000626.1scaffold_923.1	73549	2.2953e-20
5865665	2		67.1311	0.476088	-0.322312	228	0.164917		TGCAGGTGCGACTTAGGATCCGTCGTACTGTCATAAACCGGGATTTTAC	5865665	1.23513e-19	LFQT01003071.1_Scaffold00150	182519	1.70225e-13		0	999		0	999		0	0	999	LFLV01002456.1scaffold_967.1	22363	7.46861e-14
14786061	2		67.1311	0.490883	-0.309022	228	0.154117		TGCAGGGAAGTCTTCTGAGTCTCGAACAACAAAGCAGAATGGTACTATGCAGTTTAC	5851548	7.28006e-23	LFQT01003922.1_Scaffold00110	26590	4.84395e-20		0	999		0	999		0	0	999		0	999
5865539|F|0--7:A>G	2		67.1311	0.783391	-0.106022	228	0.0245192		TGCAGCAAAAGGATATGGTTGGCAGGACAGGAGAGGCATTCAGGGTTTCGGAGTTTAC	5865539	1.60704e-24	LFQT01004168.1_Scaffold02175	2179	6.46186e-19		0	999		0	999		0	0	999	LFLV01000817.1scaffold_271.1	80327	2.8042e-19
5862845	2		67.4678	0.918976	-0.0366958	228	0.00335682		TGCAGAATAAACATCATTCGATTCGGTTGGAATCATCCTCGATGTTTTACGATAAAACTGGAGGGATTG	5862845	1.52834e-30	LFQT01003369.1_Scaffold01109	2670	3.0988e-18		0	999		0	999		0	0	999	LFLV01002232.1scaffold_159.1	262323	1.32546e-23
5862845|F|0--7:T>C	2		67.4678	0.931381	-0.0308726	228	0.00240526		TGCAGAATAAACATCATTCGATTCGGTTGGAATCATCCTCGATGTTTTACGATAAAACTGGAGGGATTG	5862845	1.52834e-30	LFQT01003369.1_Scaffold01109	2670	3.0988e-18		0	999		0	999		0	0	999	LFLV01002232.1scaffold_159.1	262323	1.32546e-23
5862845|F|0--15:A>C	2		67.4678	0.99914	-0.000373826	228	3.77e-07		TGCAGAATAAACATCATTCGATTCGGTTGGAATCATCCTCGATGTTTTACGATAAAACTGGAGGGATTG	5862845	1.52834e-30	LFQT01003369.1_Scaffold01109	2670	3.0988e-18		0	999		0	999		0	0	999	LFLV01002232.1scaffold_159.1	262323	1.32546e-23
5838368	2		67.8045	0.909197	-0.0413421	228	0.00421979		TGCAGCGCCCGAAACACATCCTTGAACTCCTGAACCAATGGGGGATACCGGGCTACCACCCCCTACAAC	5838368	1.52834e-30	LFQT01007012.1_Scaffold00651	20677	2.41252e-14		0	999		0	999		0	0	999	LFLV01002291.1scaffold_683.1	5141	1.03925e-14
5861475|F|0--45:C>T	2		68.8146	0.353752	-0.451301	228	0.279497		TGCAGTGACCGTTGATGTGTATCCAGCTGGAGTTTTATCGACAGTCTCTAGCGCCAAACTGTGGGAACC	5861475	7.11069e-29	LFQT01007940.1_Scaffold00512	18063	3.95223e-27		0	999		0	999		0	0	999	CM004496.1_chromosome_B6	8414664	3.6593e-29
5855057	2		68.8146	0.438791	-0.357742	228	0.194715		TGCAGTGATCACAATGAGGATAATAATTTTTGTAAGAACAGTTCATTCTAGAGTGCAGAGACCAGCTCA	5855057	1.52834e-30	LFQT01003412.1_Scaffold00229	49302	8.49476e-29	C5	25098305	7.53503e-17	NC_027752.1_chromosome_C5	25098305	7.54017e-17	chrC05	22161943	1	1.28417e-16	LFLV01000474.1scaffold_295.1	49946	3.6593e-29
5846112	2		68.8146	0.641645	-0.192705	228	0.0702966		TGCAGTCTCAGCATCATTTCCCCCTTCATAATCAATGTGGGATGGTTCTTAC	5846112	2.92937e-21		0	999		0	999		0	999		0	0	999	CM004496.1_chromosome_B6	12564277	2.30934e-19
5855056|F|0--24:C>A	2		68.8146	0.887549	-0.0518078	228	0.00648684		TGCAGTGATCACAATGAGGATAATCATTTTTGTAAGAACTGTTCATTCTAGAGTGCAGAGACCAGCTCA	5855056	1.52834e-30	LFQT01003412.1_Scaffold00229	49302	1.83879e-25		0	999		0	999		0	0	999	LFLV01000474.1scaffold_295.1	49946	7.921e-26
5853850|F|0--51:G>T	2		69.1513	0.501476	-0.29975	228	0.146712		TGCAGGCTGGGGTCGAGGCTGTGTAGCTGAAACGTCCGGGAAGTCGAAGTCGGCTGAGCTACAACAAGC	5853850	1.52834e-30	CM007197.1_chromosome_B3	25835348	6.61348e-25		0	999		0	999		0	0	999	LFLV01000898.1scaffold_1615.1	6104	3.6593e-29
5852641|F|0--9:G>A	2		69.8247	0.891928	-0.0496701	228	0.00598832		TGCAGCGGCGGCTCCGGCAGTTCCCATTGATAGGGTGAGAGATTGCAAATTGTGGGCACTCTCTTGAAG	5852641	1.52834e-30	CM007197.1_chromosome_B3	66547908	8.49476e-29	C5	26523942	7.48191e-22	NC_027752.1_chromosome_C5	26523942	7.48701e-22	chrC05	23740348	2	2.74068e-23	LFLV01000817.1scaffold_271.1	213577	1.70251e-27
5865417|F|0--61:T>G	2		70.4981	0.305236	-0.515365	228	0.341793		TGCAGAAAATCATGTATGACAACTCATAACTCATAAAGGTCTATCCGATAAAAACTAGATCTTTTCATA	5865417	7.11069e-29	CM007196.1_chromosome_B2	13674535	1.83879e-25		0	999		0	999		0	0	999	CM004496.1_chromosome_B6	11165983	1.70251e-27
5865416	2		70.4981	0.966346	-0.0148674	228	0.000577472		TGCAGAAAATCATGTATGACAACTCATAACTCATAAAGGTCTATCCGATAAAAACTAGATCGATTCATA	5865416	7.11069e-29	CM007196.1_chromosome_B2	13674535	1.83879e-25		0	999		0	999		0	0	999	CM004496.1_chromosome_B6	11165983	1.70251e-27
5851669|F|0--25:T>G	2		70.8348	0.902214	-0.0446902	228	0.00489712		TGCAGCAAAGCCAATGGAGTCCCTGTGGACTACCTTCTCTGTAAGCTCTTCAAACACTCTTTATCTGGA	5851669	1.52834e-30	CM007200.1_chromosome_B6	15496770	5.11253e-26		0	999		0	999		0	0	999	CM004494.1_chromosome_B4	2697547	2.20233e-26
19818926	2		71.5082	0.437533	-0.35899	228	0.195789		TGCAGTGTTACTTTCTTCCCAATGGCGCGTTTGCAACCTACACTCTCATGATAGGTGTTAC	19818926	3.72679e-26		0	999		0	999		0	999		0	0	999		0	999
5855376	2		71.5082	0.711934	-0.14756	228	0.0442455		TGCAGTTCATCATCCGGTAAGGAAAGCAAACTTGAATCTGCCATAGGTATTCCGATTGGAAGAAGAGAT	5855376	7.11069e-29	LFQT01004863.1_Scaffold01548	16263	3.98029e-22		0	999		0	999		0	0	999	LFLV01002230.1scaffold_1806.1	11721	3.6593e-29
5865417	2		72.1816	0.0452501	-1.34438	228	1.31222		TGCAGAAAATCATGTATGACAACTCATAACTCATAAAGGTCTATCCGATAAAAACTAGATCTTTTCATA	5865417	7.11069e-29	CM007196.1_chromosome_B2	13674535	1.83879e-25		0	999		0	999		0	0	999	CM004496.1_chromosome_B6	11165983	1.70251e-27
14783765|F|0--20:T>C	2		72.1816	0.0655313	-1.18355	228	1.10851		TGCAGTTCAATTGGTGACAATTCATCTTGGAGGAGACTTGTTAC	14783765	6.15192e-17		0	999		0	999		0	999		0	0	999	LFLV01000581.1scaffold_668.1	92742	4.84985e-15
5866194|F|0--60:A>G	2		72.1816	0.134667	-0.870739	228	0.729564		TGCAGAAGGATAGATTCAAACTAGAGCTTCTTTGCTTCATATAACCAGTGTACTCTCTAGAACAATTGG	5866194	1.52834e-30	LFQT01005385.1_Scaffold01041	16893	1.83879e-25		0	999		0	999		0	0	999	LFLV01001011.1scaffold_599.1	43853	7.921e-26
14783765	2		72.1816	0.407938	-0.389406	228	0.222484		TGCAGTTCAATTGGTGACAATTCATCTTGGAGGAGACTTGTTAC	14783765	6.15192e-17		0	999		0	999		0	999		0	0	999	LFLV01000581.1scaffold_668.1	92742	4.84985e-15
19819041	2		72.1816	0.677539	-0.169066	228	0.0561125		TGCAGAAGGATAGATTCAAACTAGAGCTTCTTTGCTTCATATAACCACTGTACTCTCTAGGACATTTGG	19819041	1.52834e-30	LFQT01005385.1_Scaffold01041	16893	3.95223e-27		0	999		0	999		0	0	999	LFLV01001011.1scaffold_599.1	43853	1.70251e-27
5860294|F|0--6:G>C	2		72.855	0.517612	-0.285995	228	0.135933		TGCAGCGAGGAAGGCGCGGATTGCATTATAGCTAGCGCGTGTAAGGCAGATTCGGTGAAAGTAGGTGGT	5860294	1.52834e-30	LFQT01009470.1_Scaffold00003	1143896	8.49476e-29		0	999		0	999		0	0	999	CM004498.1_chromosome_B8	5345360	1.70251e-27
5857793|F|0--5:C>T	2		72.855	0.964057	-0.0158971	228	0.000658735		TGCAGCGTCAGTGGTTACCGTTGACATGTTTCCAGTTAGGGTTAGATTAC	5857793	3.55254e-20	LFQT01008911.1_Scaffold00367	32776	6.33253e-18		0	999		0	999		0	0	999	CM004498.1_chromosome_B8	11946375	2.77394e-18
5831789	2		73.1917	0.460219	-0.337035	228	0.177126		TGCAGCAATTTATTCTTCAAGGAAACATCAGCAGGATTAGCTATCTTACTCTTTCTACGAAGTACATTG	5831789	1.52834e-30	LFQT01008353.1_Scaffold00319	58780	8.49476e-29		0	999		0	999		0	0	999	LFLV01001384.1scaffold_819.1	67708	3.6593e-29
5865971	2		73.1917	0.553485	-0.256894	228	0.113987		TGCAGACTCTTTACTTCAGCCTTCTTGGCAGCATCCCTCAGAATATGTGCTTCAGCTGTAGCCAGAACA	5865971	1.52834e-30	LFQT01008183.1_Scaffold01120	9363	1.83879e-25		0	999		0	999		0	0	999	LFLV01000268.1scaffold_2119.1	684	7.921e-26
5865963|F|0--14:C>T	2		73.1917	0.762813	-0.117582	228	0.0295508		TGCAGACTCTTTACCTCAGCCTTCTTGGCGGCATCCCTCAGAATATGTTCTTCAGCTGTGGCCACAACA	5865963	1.52834e-30	LFQT01002356.1_Scaffold00683	47916	3.95223e-27	C7	35604032	9.81637e-11	NC_027754.1_chromosome_C7	35604032	9.82307e-11		0	0	999	LFLV01000525.1scaffold_597.1	26303	7.921e-26
5861624|F|0--53:C>T	2		73.1917	0.823579	-0.0842946	228	0.0161255		TGCAGTTCCGGTCGGAGTCGGAAATTTGATACCAAGGTGATATGTGGATGGTACTGCCTTAC	5861624	1.06146e-26	LFQT01001251.1_Scaffold00015	497965	1.55724e-20		0	999		0	999		0	0	999	LFLV01001593.1scaffold_131.1	436718	6.73633e-21
5839696	2		73.1917	0.863891	-0.0635412	228	0.0095333		TGCAGTATGCTCATCACACTCGTTCACCAGCATGGAGTGTTTGCTCGAACTCTCGAGGCTCTAATTTAC	5839696	1.52834e-30	LFQT01002891.1_Scaffold00102	170937	4.03701e-12		0	999		0	999		0	0	999	CM004494.1_chromosome_B4	17137569	8.03387e-16
5846673	2		73.5284	0.319998	-0.494852	228	0.321516		TGCAGTAAAATAGATGATATGAACTTAGATATTTGACGGATTAC	5846673	6.15192e-17	LFQT01003537.1_Scaffold00749	17540	2.37375e-11	C5	13385276	4.36283e-11	NC_027752.1_chromosome_C5	13385276	4.36581e-11	chrC05	10541803	14	7.60441e-11	CM004498.1_chromosome_B8	1845815	1.04981e-11
5845345	2		73.5284	0.352162	-0.453258	228	0.281352		TGCAGAAGCACGAGCCACCGTTAC		999		0	999		0	999		0	999		0	0	999		0	999
5864180	2		73.8651	0.282721	-0.548642	228	0.375299		TGCAGATCTCAGACCTAAACCACAAATCAGACCGCTACAGTCTTTGGTCCCTGCCGGTTCCAGCTTTTA	5864180	1.52834e-30	LFQT01001012.1_Scaffold00784	33850	8.49476e-29		0	999		0	999		0	0	999	LFLV01001799.1scaffold_1192.1	11009	7.921e-26
5865714	2		73.8651	0.445665	-0.350991	228	0.188929		TGCAGACAATGTTCCTCCATATGAAGCTTTTTACCTGAGAGTCTTTAC	5865714	4.28913e-19		0	999		0	999		0	999		0	0	999		0	999
5864564|F|0--17:G>A	2		73.8651	0.334873	-0.47512	228	0.302298		TGCAGCAGATGTCTATCGTAGATATGAGATAGAATCAGTTAC	5864564	7.29484e-16		0	999		0	999		0	999		0	0	999		0	999
5864551	2		73.8651	0.716945	-0.144514	228	0.0426506		TGCAGCAGCCTCAGCTTTTAC		999		0	999		0	999		0	999		0	0	999		0	999
5848068	2		73.8651	0.721119	-0.141993	228	0.041347		TGCAGCTGCGTGGTCGCAAAGTTAC		999		0	999		0	999		0	999		0	0	999		0	999
5842971	2		73.8651	0.764283	-0.116746	228	0.0291743		TGCAGCAGATTGCTGATTTATCTTCTCGGTTGTCTTTAC	5842971	3.1445e-14	CM007202.1_chromosome_B8	58544715	8.28299e-10		0	999		0	999		0	0	999	LFLV01002507.1scaffold_944.1	73979	2.22389e-12
14774699	2		73.8651	0.86727	-0.0618458	228	0.00906144		TGCAGCTCGTTAGGACAATATAAACTTGTTGAAATACTTAC	14774699	2.50443e-15		0	999		0	999		0	999		0	0	999	LFLV01001752.1scaffold_975.1	52970	1.93407e-13
5848045	2		73.8651	0.896948	-0.0472326	228	0.00544184		TGCAGAGGAACACACAGTTTTTGGGGATTTCAATTAC	5848045	3.6609e-13		0	999		0	999		0	999		0	0	999		0	999
5832675	2		73.8651	0.945433	-0.0243691	228	0.00151961		TGCAGCTCCTATGTCGCAGAGGGCACGCGAGAAAGTGATTCCTTGCACTACACATGGTACTTTAC	5832675	2.44442e-28	CM007199.1_chromosome_B5	24605248	4.64776e-26		0	999		0	999		0	0	999	LFLV01002507.1scaffold_944.1	58527	2.00657e-26
5865584|F|0--6:T>C	2		73.8651	0.963682	-0.0160663	228	0.000672574		TGCAGCTAGCTGAGCAGTGTTAGCCTGTTCTCGATCTTGCGCCATCTTTAC	5865584	1.02066e-20	LFQT01008260.1_Scaffold00489	30020	8.51931e-17		0	999		0	999		0	0	999	CM004494.1_chromosome_B4	14322738	8.00924e-19
5836748	2		74.5385	0.638329	-0.194955	228	0.0717049		TGCAGTGGTGTTTGCTCTCAAGATATGGCGTTCATACTTGTATGGTGCCAAGGTTCAGATCTTAC	5836748	2.44442e-28	LFQT01003050.1_Scaffold00624	7558	6.01225e-25	C2	37882971	1.89534e-22	NC_027749.1_chromosome_C2	37882971	1.89663e-22	chrAnn_random	28665908	14	1.49952e-20	LFLV01000793.1scaffold_449.1	12275	2.59566e-25
19819033	2		74.5385	0.754447	-0.122371	228	0.031743		TGCAGCGTTCCTTGGAAATGAACTGATAAATGAGGTACAAGCTACACTTGACAATGTTCAGAAGTTGTT	19819033	1.52834e-30	CM007197.1_chromosome_B3	57465275	2.37863e-24		0	999		0	999		0	0	999	LFLV01002009.1scaffold_785.1	83606	4.76721e-23
5848071	2		75.8899	0.729673	-0.136872	228	0.0387468		TGCAGCTTGTCTTCATCAGGGATGAGAGGATTAC	5848071	1.41938e-11		0	999		0	999		0	999		0	0	999	LFLV01000817.1scaffold_271.1	161062	1.19032e-08
5861526	2		76.8152	0.528543	-0.276919	228	0.12896		TGCAGTGGCAGTTACATCTAGAGAGGAGAATGACGGTGAGGATGATGTCCCTGAGGATAAGGGTTCGGA	5861526	1.52834e-30	LFQT01005299.1_Scaffold00348	12035	8.49476e-29	C4	35675840	9.61023e-26	NC_027751.1_chromosome_C4	35675840	9.61678e-26	chrA04	7250881	2	3.5453e-22	CM004494.1_chromosome_B4	16686042	7.921e-26
5845907	2		76.9034	0.321336	-0.49304	228	0.319739		TGCAGGCATCGTCCTGTCCAAGATCACAATCAGATCTACAAGGATCGTCCTGTTTAC	5845907	5.62783e-24	LFQT01002348.1_Scaffold00593	44361	6.31053e-14		0	999		0	999		0	0	999	CM004492.1_chromosome_B2	10706826	9.78907e-19
5865768	2		76.9034	0.381646	-0.41834	228	0.248712		TGCAGATAAATGTCAATACTCGAGGATAACTACAAAGATCGACGAAAAAAGGAATATTTCCAAAAGAGA	5865768	1.52834e-30	LFQT01001258.1_Scaffold00246	103616	6.61348e-25	Scaffold01273	7310	9.67846e-21	NW_013617819.1_UnpScaffold01273	7310	9.68506e-21	chrC04	20947045	14	1.64947e-20	LFLV01001520.1scaffold_1786.1	472	6.12331e-27
5855531|F|0--22:T>G	2		76.9034	0.489379	-0.310355	228	0.15519		TGCAGTTGGTTCAGGAGCTGTTTCAGGTGGTTGCAGAGTAGCAGTATCAGTAGCCGGAACTGGTTCAAT	5855531	1.52834e-30	LFQT01008267.1_Scaffold00221	36701	8.49476e-29		0	999		0	999		0	0	999	LFLV01000497.1scaffold_434.1	80777	1.70251e-27
5849923|F|0--8:T>C	2		76.9034	0.606183	-0.217396	228	0.0862655		TGCAGAAGTTCAGAGTGGAAGGAAACAGAGCAGTTCCATTACACCAGAGTTTCTTGGACTAGGACAGAC	5849923	1.52834e-30	LFQT01002891.1_Scaffold00102	86659	8.49476e-29	C6	30086275	5.78387e-23	NC_027753.1_chromosome_C6	9736133	5.78781e-23	chrC06	11551549	2	9.85725e-23	CM004494.1_chromosome_B4	17206133	3.6593e-29
5854779	2		76.9034	0.632869	-0.198687	228	0.0740614		TGCAGTCAGTGGCTACTTTTTTTGTCAAGTTATGTCTGCTGTTTGTAGAAACACTACTGGTCCAGGTGA	5854779	1.52834e-30	LFQT01004847.1_Scaffold00194	79943	8.49476e-29		0	999		0	999		0	0	999	CM004494.1_chromosome_B4	16758964	3.6593e-29
5844235	2		76.9034	0.646787	-0.189239	228	0.0681466		TGCAGGTGCGATATATGGTCCTCAGCCTCCAGGGACTTAC	5844235	8.57861e-15	LFQT01006766.1_Scaffold00256	96631	1.46802e-12		0	999		0	999		0	0	999	LFLV01000628.1scaffold_1328.1	4227	6.5697e-13
5845886	2		76.9034	0.754429	-0.122381	228	0.0317478		TGCAGGATCAAAGGGACTGTTTGGAAACTACCATGTGAGTCTTTTTTAGATTTTAC	5845886	1.96942e-23		0	999		0	999		0	999		0	0	999		0	999
5845603	2		76.9034	0.827678	-0.0821385	228	0.015373		TGCAGCAAAACTAAAAATCAAGATTCTCATGTCCCTTAC	5845603	3.1445e-14		0	999		0	999		0	999		0	0	999	LFLV01002313.1scaffold_719.1	23937	2.22389e-12
5845527	2		76.9034	0.842381	-0.0744916	228	0.012828		TGCAGATCCAAGTTCATCTCAAATCCCGATACTCGCGGAATCTCGTTGGATTAC	5845527	2.40607e-22	LFQT01002261.1_Scaffold02060	2645	2.04239e-18		0	999		0	999		0	0	999	LFLV01001015.1scaffold_916.1	53405	8.89915e-19
5865958	2		77.2401	0.377788	-0.422752	228	0.252779		TGCAGGTTCATTTGGGATTTCCGCATCTGAATTTCTCGATGTTGACTTCCTTTTGTGAATCGTATGTTT	5865958	1.52834e-30	LFQT01007059.1_Scaffold00507	62108	1.83879e-25		0	999		0	999		0	0	999	LFLV01002449.1scaffold_539.1	88374	7.921e-26
5854847	2		77.2401	0.498405	-0.302418	228	0.148832		TGCAGTCGATCGATATCGTCCTCGTCTTGCCGGTCGATTTCTGGTACACGTCTACTCGGATCTTTTTTT	5854847	1.52834e-30	CM007202.1_chromosome_B8	15693997	8.55507e-24		0	999		0	999		0	0	999	LFLV01001260.1scaffold_1007.1	33547	3.68528e-24
5846431	2		77.2401	0.572064	-0.242556	228	0.103634		TGCAGATAATCAGAACCTTCAGGGGAAGTTAGGTTTACTTGGCTTTCCTCTGATTAC	5846431	5.62783e-24	LFQT01007148.1_Scaffold00090	218186	1.35636e-15		0	999		0	999		0	0	999	CM004498.1_chromosome_B8	5475979	1.62651e-21
14785458|F|0--18:T>C	2		77.2401	0.591608	-0.227966	228	0.0934337		TGCAGAAGCAAAACTCGATCGATAAGCAACCGATTGCATCGATCGATATACAGACTTAC	14785458	4.58575e-25		0	999		0	999		0	999		0	0	999	CM004497.1_chromosome_B7	25203577	4.83044e-17
5854847|F|0--14:A>G	2		77.2401	0.599645	-0.222106	228	0.0894358		TGCAGTCGATCGATATCGTCCTCGTCTTGCCGGTCGATTTCTGGTACACGTCTACTCGGATCTTTTTTT	5854847	1.52834e-30	CM007202.1_chromosome_B8	15693997	8.55507e-24		0	999		0	999		0	0	999	LFLV01001260.1scaffold_1007.1	33547	3.68528e-24
5854848	2		77.2401	0.61292	-0.212597	228	0.0830745		TGCAGTCGATCGATGTCGTCCTCGTCTCGCCGGTCGATTTCTGGTACACGTCTACTCGGAGCTTTTTTT	5854848	1.52834e-30	CM007202.1_chromosome_B8	15693997	8.49476e-29		0	999		0	999		0	0	999	LFLV01001260.1scaffold_1007.1	33547	3.6593e-29
5860192|F|0--54:G>C	2		77.2401	0.944939	-0.024596	228	0.00154728		TGCAGCAGGAGGCATGAATTGCCACATGGCAAAGCCAGGGTAAGTTGTGAAAGGGACAAGCTTGCTTCC	5860192	1.52834e-30	CM007197.1_chromosome_B3	66303200	8.49476e-29		0	999		0	999	chrA05_random	1192489	1	1.63784e-25	LFLV01000817.1scaffold_271.1	28398	1.70251e-27
5865636|F|0--24:G>A	2		77.5768	0.328816	-0.483047	228	0.309983		TGCAGATGAGAGATATGGTCTTCTGCCTCGAGGGACTTGACCAATATGTCGTCAATATAGACCTCCATT	5865636	1.52834e-30	LFQT01009470.1_Scaffold00003	936116	8.49476e-29		0	999		0	999		0	0	999	LFLV01000645.1scaffold_1282.1	1958	6.12331e-27
5858054	2		77.9146	0.371804	-0.429687	228	0.259204		TGCAGGAATCTCAGTGGTGACTTGAAAAGCAGAAGCATTCGAAATGGATTAC	5858054	2.92937e-21	CM007201.1_chromosome_B7	17028779	5.28698e-19		0	999		0	999		0	0	999	LFLV01002342.1scaffold_249.1	157077	1.07443e-17
5850243	2		77.9146	0.410836	-0.386331	228	0.219743		TGCAGACACTCATCGACTATAAGTTGTGCCTTTCTAACAAAGGATCGGATGCCTGCTCATGCTTACAAT	5850243	1.52834e-30	CM007197.1_chromosome_B3	66283145	1.83879e-25		0	999		0	999		0	0	999	CM004493.1_chromosome_B3	5632538	7.921e-26
5866179	2		77.9146	0.713451	-0.146636	228	0.0437592		TGCAGATCTTGCTTTTACAAAGTTCTTCGTGCTGTTGATGGATGCTAAGTTGTCTATTAGCTTCACAGC	5866179	1.52834e-30	CM007201.1_chromosome_B7	4073	1.83879e-25		0	999		0	999		0	0	999	CM004493.1_chromosome_B3	13797537	1.71459e-22
5865882|F|0--10:T>C	2		78.2502	0.729847	-0.136768	228	0.0386951		TGCAGTTATATGTCATGCCCCCTGCATTGTATATAGCTCATGGCATTTTTAC	5865882	2.92937e-21	LFQT01009459.1_Scaffold03107	4776	5.28698e-19		0	999		0	999		0	0	999	LFLV01002045.1scaffold_969.1	37366	2.32574e-14
5865919|F|0--11:C>A	2		78.9236	0.132471	-0.877879	228	0.7379		TGCAGTTTGGGCAATAACCTCCGTAAATGTCTTCACGTCGGTAATCATGGCCATATAAGCACCTTGGAG	5865919	1.52834e-30	LFQT01003142.1_Scaffold00038	531837	2.39552e-19		0	999		0	999		0	0	999	LFLV01001183.1scaffold_168.1	503276	1.03192e-19
5865919	2		78.9236	0.33526	-0.474618	228	0.301812		TGCAGTTTGGGCAATAACCTCCGTAAATGTCTTCACGTCGGTAATCATGGCCATATAAGCACCTTGGAG	5865919	1.52834e-30	LFQT01003142.1_Scaffold00038	531837	2.39552e-19		0	999		0	999		0	0	999	LFLV01001183.1scaffold_168.1	503276	1.03192e-19
5865919|F|0--22:G>A	2		78.9236	0.534498	-0.272054	228	0.125269		TGCAGTTTGGGCAATAACCTCCGTAAATGTCTTCACGTCGGTAATCATGGCCATATAAGCACCTTGGAG	5865919	1.52834e-30	LFQT01003142.1_Scaffold00038	531837	2.39552e-19		0	999		0	999		0	0	999	LFLV01001183.1scaffold_168.1	503276	1.03192e-19
5864671|F|0--6:A>C	2		78.9236	0.584811	-0.232984	228	0.0969028		TGCAGAAAGAGAAACCTACATCAGTTGCTATGTAGAAATTGTCTCATCTAAGGTTCATATGTAAGAAAT	5864671	1.52834e-30	LFQT01000059.1_Scaffold00213	25436	8.49476e-29		0	999		0	999	chrA03	29700580	1	5.89072e-25	LFLV01002023.1scaffold_775.1	93969	1.70251e-27
5838391	2		78.9236	0.852388	-0.0693628	228	0.0112324		TGCAGCTCTCTCTCCTCTATGTTTATTCATTTCTTTGTCAACTTGTGTCAAGATTTAGTCTTTAC	5838391	2.44442e-28		0	999		0	999		0	999		0	0	999		0	999
5864670|F|0--44:C>T	2		79.2603	0.206936	-0.684163	228	0.518502		TGCAGGCAGAGAAACCTACATCAGTTGCTATGTAGAAATTGTCTCATCTAAGGTTCATATGTAAGAAAT	5864670	1.52834e-30	LFQT01000059.1_Scaffold00213	38735	3.95223e-27		0	999		0	999	chrA03	29700580	1	5.89072e-25	LFLV01002023.1scaffold_775.1	78066	3.6593e-29
5865348	2		79.2603	0.326771	-0.485756	228	0.312621		TGCAGCCGTGGGTAACTTGGCGTGTGTACTTTAC	5865348	1.41938e-11	CM007196.1_chromosome_B2	28469680	1.98606e-09		0	999		0	999		0	0	999		0	999
5865963	2		79.2603	0.328008	-0.484116	228	0.311023		TGCAGACTCTTTACCTCAGCCTTCTTGGCGGCATCCCTCAGAATATGTTCTTCAGCTGTGGCCACAACA	5865963	1.52834e-30	LFQT01002356.1_Scaffold00683	47916	3.95223e-27	C7	35604032	9.81637e-11	NC_027754.1_chromosome_C7	35604032	9.82307e-11		0	0	999	LFLV01000525.1scaffold_597.1	26303	7.921e-26
5865539	2		79.2603	0.51102	-0.291562	228	0.140266		TGCAGCAAAAGGATATGGTTGGCAGGACAGGAGAGGCATTCAGGGTTTCGGAGTTTAC	5865539	1.60704e-24	LFQT01004168.1_Scaffold02175	2179	6.46186e-19		0	999		0	999		0	0	999	LFLV01000817.1scaffold_271.1	80327	2.8042e-19
5834871	2		79.2603	0.690085	-0.161098	228	0.051595		TGCAGTTGCATCAGCTCTCTCTGAGTAACTGAATCAAGAGTCCCTAAGTGAAACATTTAGAGAAAAGAA	5834871	1.52834e-30	LFQT01000907.1_Scaffold00492	53852	8.49476e-29	C8	27983669	2.08025e-22	NC_027755.1_chromosome_C8	27983669	2.08167e-22	chrC08	25157688	2	3.5453e-22		0	999
14785978|F|0--13:G>T	2		79.2614	0.281079	-0.551172	228	0.377876		TGCAGCTTGAGCAGCAGCTTCTAGATCAGGGATTGCAGCCCCCTGGTCATTAC	14785978	3.90779e-20	LFQT01006766.1_Scaffold00256	54894	9.23978e-12		0	999		0	999		0	0	999	LFLV01001768.1scaffold_353.1	215915	4.03078e-12
5852411|F|0--36:G>A	2		79.266	0.681175	-0.166741	228	0.0547803		TGCAGCCGCGTCCATATACTGGTTCCTTAGCAGGGGGAACATAAACGAAATAAACATCACCACTGGTTG	5852411	1.52834e-30	LFQT01003412.1_Scaffold00229	100882	3.95223e-27		0	999		0	999		0	0	999	LFLV01000474.1scaffold_295.1	18716	1.70251e-27
5833672	2		79.266	0.928555	-0.0321923	228	0.00260799		TGCAGGTCAAAAAGCACAAATCTGCTCAGCCCAATATCAAACTCAGGTAAAAAAGTGCAGTAAGCATGG	5833672	1.52834e-30	LFQT01000907.1_Scaffold00492	63468	8.49476e-29	C5	19865481	2.08025e-22	NC_027752.1_chromosome_C5	19865481	2.08167e-22	chrC05	17320621	2	3.5453e-22		0	999
5866080	2		80.2704	0.335005	-0.474949	228	0.302132		TGCAGTCTCCGGAACAGAGCGCTGGTAAGTTTGCCGGAAAGTTTCGGAGGATCCTCAATAACTGCAAGC	5866080	1.52834e-30	LFQT01004871.1_Scaffold00301	28658	1.83879e-25		0	999		0	999		0	0	999	LFLV01000940.1scaffold_903.1	26653	7.921e-26
5831402	2		80.2704	0.664514	-0.177496	228	0.0610398		TGCAGATGGCTCAAAGGTGATTCATAAGATGGGAGAGTTGCTTGACAATCCCAATGTTTACAGGAAGTT	5831402	1.52834e-30	LFQT01006766.1_Scaffold00256	40010	8.49476e-29		0	999		0	999		0	0	999	CM004494.1_chromosome_B4	18174904	3.6593e-29
5854901|F|0--18:G>C	2		80.2704	0.783081	-0.106193	228	0.0245911		TGCAGTCTATGATGATTCGCTATAACATTCTATTCTATGAGAATAATAGACTGACCAAAAGTATGAGAA	5854901	1.52834e-30	LFQT01007498.1_Scaffold00131	130971	8.49476e-29		0	999		0	999		0	0	999	CM004494.1_chromosome_B4	18887755	1.70251e-27
5866114	2		80.2749	0.219454	-0.658656	228	0.490806		TGCAGTGGCACGCTCAGGTCCCAGCTTTCGTCTCGTTTGTTTTATGGGTTTGTGAGTCGGGTCGATGTT	5866114	1.52834e-30	LFQT01008223.1_Scaffold00732	46962	1.83879e-25		0	999		0	999		0	0	999	LFLV01002425.1scaffold_1837.1	15410	3.68528e-24
5842717	2		80.9609	0.72045	-0.142396	228	0.0415544		TGCAGATTTAGTTGTATTGGGGCTAAAGAGTAAATATCCGAAAGTTTAC	5842717	1.23513e-19		0	999		0	999		0	999		0	0	999		0	999
5865662	2		81.1963	0.447891	-0.348828	228	0.187085		TGCAGCCATAACTGCCGCTTTAC		999		0	999		0	999		0	999		0	0	999		0	999
5863978	2		81.1963	0.471701	-0.326333	228	0.168226		TGCAGTAACACAACACTTTGAGTTTGCGTACTTATGTACTTAC	5863978	2.12043e-16		0	999		0	999		0	999		0	0	999		0	999
5864035|F|0--16:A>G	2		81.1963	0.532969	-0.273298	228	0.12621		TGCAGTTGACAACACTAAAATAGTTTAGAGGACTATTAC	5864035	3.1445e-14	LFQT01005675.1_Scaffold00244	2261	2.30298e-10		0	999		0	999		0	0	999	CM004491.1_chromosome_B1	6885145	1.03468e-10
5865882	2		81.1963	0.607647	-0.216349	228	0.0855656		TGCAGTTATATGTCATGCCCCCTGCATTGTATATAGCTCATGGCATTTTTAC	5865882	2.92937e-21	LFQT01009459.1_Scaffold03107	4776	5.28698e-19		0	999		0	999		0	0	999	LFLV01002045.1scaffold_969.1	37366	2.32574e-14
5865249	2		81.1963	0.765792	-0.115889	228	0.0287907		TGCAGCAATTAGACAGAGGAAGCTTGATGATATGTTAGACGAGATGATTAC	5865249	1.02066e-20	LFQT01007842.1_Scaffold00109	49028	1.83111e-18		0	999		0	999		0	0	999	LFLV01000732.1scaffold_837.1	11794	1.7337e-15
5865461	2		81.1963	0.79694	-0.0985743	228	0.0214807		TGCAGTTTTCAAGATGTTTTCATTCCTTTCCTACGAAGAATTAC	5865461	6.15192e-17	LFQT01006123.1_Scaffold00486	23164	1.83502e-12		0	999		0	999		0	0	999	LFLV01001944.1scaffold_6245.1	121	1.74432e-14
5865544	2		81.1963	0.819679	-0.0863561	228	0.016859		TGCAGCGTTCCTTAGAAAGGAACAGATAAATGAGGTACAAGCTACACTTGACAATTTTAC	5865544	1.3077e-25	LFQT01009529.1_Scaffold01016	9687	5.29807e-20		0	999		0	999		0	0	999	CM004494.1_chromosome_B4	2697997	8.25536e-20
5846453	2		81.1963	0.897444	-0.0469925	228	0.00538929		TGCAGATCCTGAAATTTGCTTATTACGATTTTGGCATATTAC	5846453	7.29484e-16	LFQT01002752.1_Scaffold07052	231	5.93992e-12		0	999		0	999		0	0	999	LFLV01002465.1scaffold_649.1	5212	2.64087e-12
5862798	2		81.1963	0.976507	-0.0103248	228	0.000281326		TGCAGAAATCCTAAAGGTTGATATCTATCCACCAATGACCAAAAGGACGAAGGAAAGGCCAGGAATTAC	5862798	1.52834e-30	CM007202.1_chromosome_B8	26142028	2.37863e-24	C5	10565685	2.10989e-12	NC_027752.1_chromosome_C5	10565685	2.11133e-12	chrC05	9875634	2	3.59582e-12	LFLV01000817.1scaffold_271.1	80967	6.12331e-27
5865888	2		81.1963	0.996545	-0.00150309	228	6.08e-06		TGCAGTTATACGTCATGCTCACTGCATTGTGTTTAGCTCGTGGCATTTTTAC	5865888	2.92937e-21	LFQT01009470.1_Scaffold00003	937639	5.28698e-19		0	999		0	999		0	0	999	LFLV01001741.1scaffold_753.1	85065	4.99885e-16
5865544|F|0--36:A>G	2		81.2805	0.434994	-0.361517	228	0.197971		TGCAGCGTTCCTTAGAAAGGAACAGATAAATGAGGTACAAGCTACACTTGACAATTTTAC	5865544	1.3077e-25	LFQT01009529.1_Scaffold01016	9687	5.29807e-20		0	999		0	999		0	0	999	CM004494.1_chromosome_B4	2697997	8.25536e-20
5866006|F|0--37:G>A	2		81.6172	0.313188	-0.504195	228	0.330714		TGCAGCCTCAACAACAACATCAACTAGGTAACCAAGAGAGGTGAATTAC	5866006	1.23513e-19	CM007191.1_chromosome_A7	3041375	1.01727e-15		0	999		0	999		0	0	999	CM004492.1_chromosome_B2	4417724	9.59315e-18
5863006|F|0--25:T>C	2		81.6172	0.756127	-0.121405	228	0.0312959		TGCAGATCATCAGAAAGGCATCGATTGACCTGCTGTCACAAGTATCGATCGATGCGCCTCTAGTAAGCT	5863006	1.52834e-30	LFQT01005039.1_Scaffold00322	21136	3.95223e-27		0	999		0	999		0	0	999		0	999
5863543|F|0--15:T>G	2		81.6172	0.968045	-0.0141046	228	0.00052061		TGCAGTCTCTATAAATCTCAAAGGATTCAGAGGAAGATGGACCGAGACAAAGTGGATCATCTGTAAAGA	5863543	1.52834e-30	LFQT01007148.1_Scaffold00090	252508	1.83879e-25		0	999		0	999		0	0	999	CM004494.1_chromosome_B4	18269908	3.6593e-29
14771087	2		81.619	0.144596	-0.839844	228	0.693694		TGCAGAAGACGGAGGTGGTCTCCTCTCCTTAC	14780928	7.40345e-09		0	999		0	999		0	999		0	0	999	CM004493.1_chromosome_B3	25363594	1.39981e-07
5846537	2		81.619	0.424068	-0.372565	228	0.207587		TGCAGCCATGACGGATGGTTTTGAGATGCCTTAC	5846537	1.41938e-11		0	999		0	999		0	999		0	0	999		0	999
5858733	2		81.619	0.460056	-0.337189	228	0.177256		TGCAGTTCAAGCACTCAAGACTACTCTACATCAGAACTTTAC	5858733	7.29484e-16		0	999		0	999		0	999		0	0	999		0	999
5865144	2		81.619	0.489625	-0.310137	228	0.155014		TGCAGGCTATTTTGGATATGCGTCAACATTTCTCATATCCTTTAC	5865144	1.78173e-17	LFQT01000625.1_Scaffold00427	28276	1.92677e-12		0	999		0	999		0	0	999	CM004492.1_chromosome_B2	13337792	8.50196e-13
5865448	2		81.619	0.558713	-0.252811	228	0.111007		TGCAGCTGGAGCATTTACTACCTCCTCCAGTTGATTTAC	5865448	3.1445e-14	LFQT01005494.1_Scaffold00803	12676	4.94993e-12		0	999		0	999		0	0	999		0	999
5863229|F|0--55:G>A	2		82.2906	0.208632	-0.68062	228	0.514636		TGCAGCGGTGTATCATTGGTCCTAGTAATAGATAACCCAGAAAATGACAGTTACGGTTATTTTTACAGA	5863229	1.52834e-30	LFQT01004661.1_Scaffold00007	3769	1.83879e-25		0	999		0	999		0	0	999	LFLV01002366.1scaffold_223.1	2125	7.921e-26
5861658|F|0--19:C>A	2		82.2906	0.908541	-0.0416557	228	0.00428127		TGCAGTTGCTGCTGTAGATCAGGCTGTCTACCCAGAACTTTGGCTGACTACAACCGTGAAGATCAATAC	5861658	1.52834e-30	LFQT01004030.1_Scaffold00911	18806	3.95223e-27	C1	25608698	4.56711e-09	NC_027748.1_chromosome_C1	25608698	4.57023e-09	chrC04	17811074	2	2.16412e-09	LFLV01002145.1scaffold_2687.1	460	1.70251e-27
5866114|F|0--33:C>T	2		82.3119	0.0354622	-1.45023	228	1.44888		TGCAGTGGCACGCTCAGGTCCCAGCTTTCGTCTCGTTTGTTTTATGGGTTTGTGAGTCGGGTCGATGTT	5866114	1.52834e-30	LFQT01008223.1_Scaffold00732	46962	1.83879e-25		0	999		0	999		0	0	999	LFLV01002425.1scaffold_1837.1	15410	3.68528e-24
5837043	2		82.3119	0.0506193	-1.29568	228	1.25001		TGCAGACCAGTGAAGATGGTTAGATCCTTTGATCGATTTGTCGTGGTAGAAGTATTGATTTAC	5837043	3.02152e-27		0	999		0	999		0	999		0	0	999		0	999
5837401	2		82.3119	0.126384	-0.898308	228	0.761844		TGCAGCTTTATTTACTCGTGGTTCATATGCTTTGCTGAAATTTGCGGATGACCCGCGAAACCCACAAGT	5837401	1.52834e-30		0	999		0	999		0	999		0	0	999		0	999
5837372	2		82.3119	0.271941	-0.565525	228	0.392571		TGCAGCTGCATGGTCGCAAAGTTAGTTCCGTATTGTAAGTATTTATAACTGCCATGAGTTTTAC	5837372	8.59634e-28	CM007197.1_chromosome_B3	52070419	4.59614e-16		0	999		0	999		0	0	999	CM004493.1_chromosome_B3	5690604	1.97153e-21
5846406	2		82.3119	0.316	-0.500314	228	0.326885		TGCAGAGCCGTGAGAGAGGGATCCTGTATCTGATGCCTCGGATGAGAAAAGTTAC	5846406	6.88654e-23	LFQT01000059.1_Scaffold00213	18684	2.12782e-13		0	999		0	999	chrA08	4640532	1	6.86502e-08	LFLV01002023.1scaffold_775.1	86238	1.53878e-16
5866156	2		82.3119	0.372406	-0.428983	228	0.25855		TGCAGGCTTCTGCATGAATGTAGCAATCTTTCTTCTCAACTCCTCTTCGCGTGCCTCATCAAAGAAATT	5866156	1.52834e-30	LFQT01001859.1_Scaffold02525	5858	8.49476e-29		0	999		0	999		0	0	999	LFLV01001915.1scaffold_325.1	108292	7.921e-26
5843751	2		82.3119	0.393005	-0.405602	228	0.23707		TGCAGGAACCTCTAAAAAACCTCCTAAATACATTTGTTAC	5843751	8.57861e-15	CM007190.1_chromosome_A6	16620852	1.46802e-12		0	999		0	999		0	0	999	LFLV01000981.1scaffold_648.1	67845	6.5697e-13
5859037|F|0--16:G>A	2		82.3119	0.399969	-0.397974	228	0.230169		TGCAGAAAGAAGAAACGTCTTTTTTATTTAC	5859037	5.28297e-10		0	999		0	999		0	999		0	0	999	CM004493.1_chromosome_B3	5678538	3.50279e-08
14771905	2		82.3119	0.401724	-0.396072	228	0.228457		TGCAGCCGGTGGCCAACCATTGAAATGGTTCTCATTGATCTTAC	14771905	6.15192e-17	LFQT01003164.1_Scaffold00092	225854	5.10204e-13		0	999		0	999		0	0	999	LFLV01000639.1scaffold_495.1	68831	2.25641e-13
5846574	2		82.3119	0.446966	-0.349726	228	0.18785		TGCAGCTCGCTTCATGAGAGCCAGCCCTTCTTCTTTAC	5846574	1.07441e-13	LFQT01002589.1_Scaffold00751	12481	1.66163e-11		0	999		0	999		0	0	999	LFLV01000636.1scaffold_1639.1	11815	3.48877e-10
5851658|F|0--43:T>C	2		82.3119	0.465905	-0.331703	228	0.172675		TGCAGCAAACGCTAAACTCAACTGTCCTGATGGTTGGGTTCCATCTCAAGCACTTCTAGATTTTTCAAG	5851658	1.52834e-30	LFQT01007073.1_Scaffold00351	90663	8.49476e-29	C6	36520099	1.25199e-19	NC_027753.1_chromosome_C6	3302309	1.25284e-19	chrC06_random	275268	4	2.13372e-19	CM004494.1_chromosome_B4	18729772	1.70251e-27
5844817	2		82.3119	0.481949	-0.316999	228	0.160573		TGCAGTGGCTTCAATTACTATGTCGGACAACCTAATCACAAAGCGCCTTAC	5844817	1.02066e-20	LFQT01009510.1_Scaffold00252	11433	1.83111e-18		0	999		0	999		0	0	999	CM004497.1_chromosome_B7	7754797	3.72634e-17
5865709	2		82.3119	0.484525	-0.314684	228	0.158691		TGCAGACAATGTTCCTCCATATGAAGCTTTCAACCTGAGAGTCTTTAC	5865709	4.28913e-19		0	999		0	999		0	999		0	0	999		0	999
5831906	2		82.3119	0.485589	-0.313731	228	0.157919		TGCAGCAGCAAAACCCCTTACCCGGCTTACTGGTAAGGAAGTAAAATTTGCATGGACGGAGGCGTGTGA	5831906	1.52834e-30		0	999		0	999		0	999		0	0	999		0	999
5841572	2		82.3119	0.488215	-0.311389	228	0.156024		TGCAGAAATGCATTCTTGACGTCGGCCCAGGATGTAAGGGATCCTGGTAACTGCTTAC	5841572	1.60704e-24	LFQT01009147.1_Scaffold00538	41176	2.98522e-22	Scaffold00709	88662	2.06215e-11	NW_013617442.1_UnpScaffold00709	88662	2.06356e-11		0	0	999	LFLV01002177.1scaffold_1006.1	9030	1.6877e-16
5860522	2		82.3119	0.489141	-0.310566	228	0.15536		TGCAGCTACTGTTAGCTCCGCTCTCCTCCTTGGCATCTGCGGTCTTCCTGACACAATCTTCCGGGTAAG	5860522	1.52834e-30	CM007200.1_chromosome_B6	6685459	3.95223e-27		0	999		0	999		0	0	999	CM004498.1_chromosome_B8	5599266	7.921e-26
5860786	2		82.3119	0.494661	-0.305693	228	0.151445		TGCAGGAAACAAGTACAAAGACTGTCTTCAACACTGGTTTGCTGCGGCAGCACAGCAGTTCTTGATTCT	5860786	7.11069e-29	LFQT01004833.1_Scaffold00033	58373	3.95223e-27		0	999		0	999		0	0	999	CM004496.1_chromosome_B6	9282810	1.70251e-27
5837451	2		82.3119	0.507975	-0.294158	228	0.1423		TGCAGGATCCCGCATCCCACGAAAGTTCTGGTATCACGAAGTCATTTCAAACGGCTCCACAGAAGGCGA	5837451	1.52834e-30	LFQT01005372.1_Scaffold00036	18719	8.49476e-29		0	999		0	999		0	0	999	LFLV01001825.1scaffold_1225.1	23059	3.6593e-29
14790217	2		82.3119	0.511347	-0.291284	228	0.140048		TGCAGACCGCTGTTCCTCTCGGAAGGATCTAACAATTCTTTAC	14790217	9.86541e-15	LFQT01001120.1_Scaffold00437	71050	1.74327e-12	C7	13399085	2.62593e-08	NC_027754.1_chromosome_C7	13399085	2.62772e-08		0	0	999	CM004495.1_chromosome_B5	17013675	7.72906e-13
5856850	2		82.3119	0.53812	-0.269121	228	0.12306		TGCAGAATTGGAAATGGCTATCAGCAGACTTCTATCTCGAACAGATGCACCATTAC	5856850	1.96942e-23	LFQT01009510.1_Scaffold00252	102930	3.62758e-21		0	999		0	999		0	0	999	CM004497.1_chromosome_B7	7654806	3.41409e-18
5866079	2		82.3119	0.581054	-0.235784	228	0.098856		TGCAGTCTCCGGAACAGGGCTCTGGTGAGTTTTCCGGAGAGTTTTGGAGGATCCTCAATAACTGCAAGC	5866079	1.52834e-30	CM007202.1_chromosome_B8	39966460	8.55507e-24		0	999		0	999		0	0	999	CM004497.1_chromosome_B7	1876520	7.921e-26
5841464	2		82.3119	0.584312	-0.233356	228	0.097161		TGCAGAAACAGAGAAAGCTATTCTGTAACAGCATTTTTTGGAGATTGTTTAC	5841464	2.92937e-21	CM007196.1_chromosome_B2	11662789	8.84698e-17		0	999		0	999		0	0	999	CM004491.1_chromosome_B1	23030084	3.86435e-17
5854176	2		82.3119	0.586722	-0.231567	228	0.095919		TGCAGGTCTGAGCTCTCTATTATATCATCAAGTTCCCATGTTCAAGGGTAGGAGAATCATTATTGTGGT	5854176	1.52834e-30		0	999		0	999		0	999		0	0	999	LFLV01002232.1scaffold_159.1	363986	3.6593e-29
5846292	2		82.3119	0.594966	-0.225508	228	0.0917494		TGCAGAAACAATATATCCCAATAAGTGTACTTGTGAAGATCCAAAAGCACAATTTTTTAC	5846292	1.3077e-25	LFQT01004992.1_Scaffold00219	73112	1.13875e-21		0	999		0	999		0	0	999	CM004494.1_chromosome_B4	16773546	2.96916e-19
5846556	2		82.3119	0.596108	-0.224675	228	0.091181		TGCAGCGCGACCTTTGGCGGATACTTTTTTTTTAC		999		0	999		0	999		0	999		0	0	999		0	999
5837014	2		82.3119	0.602318	-0.220175	228	0.088131		TGCAGAATAAACATCCTTCGATTCGGTTGGAATCATCCTCGATGTTTACGATAAAACTGGAGGGATTGG	5837014	1.52834e-30	LFQT01005765.1_Scaffold00101	207240	8.61581e-19		0	999		0	999		0	0	999	LFLV01002232.1scaffold_159.1	262323	1.71459e-22
5849503	2		82.3119	0.608836	-0.215499	228	0.0849995		TGCAGAAACATCTCAAGACACAGCTACTGAGACATCACCTTCATCATCTTCTATAGTTTCAGTTACAGA	5849503	1.52834e-30	LFQT01008267.1_Scaffold00221	36767	1.42147e-26		0	999		0	999		0	0	999		0	999
5846642	2		82.3119	0.610417	-0.214373	228	0.084251		TGCAGGCTATTGCATAGTCTGCGTCACCTATCATCTTCTGATACTCTTAC	5846642	3.55254e-20		0	999		0	999		0	999		0	0	999		0	999
5864891	2		82.3119	0.620265	-0.207423	228	0.0796808		TGCAGCTCAGCTCCTTCCACTCAAGCCTCAGTAGGGTTGAGCTGGCCGATAGTCAATCCAGCTTCATTG	5864891	1.52834e-30	LFQT01002035.1_Scaffold08565	597	8.49476e-29		0	999		0	999		0	0	999	CM004491.1_chromosome_B1	8620425	1.71459e-22
5859073	2		82.3119	0.634581	-0.197513	228	0.0733173		TGCAGCTTCAACAAAAGACCTGCAACTGCTTCAGTTCTTCTTGTCCTTTAC	5859073	1.02066e-20		0	999		0	999		0	999		0	0	999	CM004498.1_chromosome_B8	34891475	3.72634e-17
5853243|F|0--5:C>A	2		82.3119	0.642585	-0.19207	228	0.0699007		TGCAGCTTGGAAGTTGCTGCTCTGCGGCTTCTGATGGTTGAAGCCTGGAACTGATTCTTCCCTTGTTAC	5853243	1.52834e-30	LFQT01006008.1_Scaffold01794	13088	3.05526e-28		0	999		0	999		0	0	999	CM004497.1_chromosome_B7	7756652	6.12331e-27
5865769	2		82.3119	0.645755	-0.189932	228	0.0685747		TGCAGATAAATGTCAATGTTCGAGGATAGCGACGAAGATCGACGGAAAATGGAATATTTCCAAAAGAGA	5865769	1.52834e-30	LFQT01007214.1_Scaffold01459	13394	1.42147e-26	C6	26480578	9.74717e-16	NC_027753.1_chromosome_C6	13341830	9.75382e-16		0	0	999	LFLV01001967.1scaffold_540.1	129686	6.12331e-27
5866079|F|0--9:C>T	2		82.3119	0.652256	-0.185582	228	0.065904		TGCAGTCTCCGGAACAGGGCTCTGGTGAGTTTTCCGGAGAGTTTTGGAGGATCCTCAATAACTGCAAGC	5866079	1.52834e-30	CM007202.1_chromosome_B8	39966460	8.55507e-24		0	999		0	999		0	0	999	CM004497.1_chromosome_B7	1876520	7.921e-26
5833234	2		82.3119	0.668979	-0.174588	228	0.0593231		TGCAGGAGTTAGTTCTTTGTGTGCTTCTGTCATTTGACGATGAGCAAATTCTCATGTGGAGAGGACGAG	5833234	1.52834e-30	CM007195.1_chromosome_B1	13482588	8.49476e-29		0	999		0	999		0	0	999	CM004492.1_chromosome_B2	6370512	2.88949e-15
5846411	2		82.3119	0.674564	-0.170977	228	0.0572164		TGCAGAGGAACACACACAGTTTTGGGGATTTCAATTAC	5846411	1.07441e-13		0	999		0	999		0	999		0	0	999		0	999
5832708	2		82.3119	0.685669	-0.163885	228	0.0531596		TGCAGCTCTCGAGGTGATGTTACCATTCCAATGGAACCTTGAGCACAGTTGTTCTATCATCTTGATACA	5832708	1.52834e-30	CM007202.1_chromosome_B8	15729241	8.55507e-24		0	999		0	999		0	0	999	CM004491.1_chromosome_B1	23018321	3.68528e-24
5846551	2		82.3119	0.696771	-0.15691	228	0.0492769		TGCAGCCTTGATTGTACCAAACTCACGAGGGTTGATCCGAAAAGTTAC	5846551	4.28913e-19	CM007199.1_chromosome_B5	34240268	3.68477e-10		0	999		0	999		0	0	999	LFLV01002130.1scaffold_240.1	342112	3.33582e-12
5837196	2		82.3119	0.69763	-0.156375	228	0.0489836		TGCAGATTTGTTTGAAAGTGTTAGCAATTTCAATAGCTGCTTACAAAGTATCATCTCATTAC	5837196	1.06146e-26	CM007197.1_chromosome_B3	70603350	4.3297e-21		0	999		0	999		0	0	999	LFLV01001781.1scaffold_193.1	442152	4.05423e-18
5844066	2		82.3119	0.698104	-0.15608	228	0.048822		TGCAGGGCATGTACCCGAAAAGACGAGAAAAAATTTTGCGTCAGAAAACAATTTAC	5844066	1.96942e-23		0	999		0	999		0	999		0	0	999		0	999
5865820	2		82.3119	0.705986	-0.151204	228	0.0461822		TGCAGTCGTCGATCATCCCGTCGATCAGGGAGATGAACTGCAAGGATAAAATCATATTAC	5864426	4.70333e-25	CM007200.1_chromosome_B6	16523293	2.44758e-23		0	999		0	999		0	0	999	CM004498.1_chromosome_B8	13025302	1.06037e-23
5837527	2		82.3119	0.708915	-0.149406	228	0.0452227		TGCAGGTCCAGATACTTGTTTGAGCAACCTTGCCTCCTGTGATCGATACTCCCAAGGTAAATGATGTCT	5837527	1.52834e-30	CM007200.1_chromosome_B6	17068495	1.10667e-22	C3	45666516	1.61955e-18	NC_027750.1_chromosome_C3	45666516	1.62065e-18	chrC03	32689808	9	1.64947e-20	CM004494.1_chromosome_B4	2412499	4.76721e-23
5855056	2		82.3119	0.712107	-0.147455	228	0.04419		TGCAGTGATCACAATGAGGATAATCATTTTTGTAAGAACTGTTCATTCTAGAGTGCAGAGACCAGCTCA	5855056	1.52834e-30	LFQT01003412.1_Scaffold00229	49302	1.83879e-25		0	999		0	999		0	0	999	LFLV01000474.1scaffold_295.1	49946	7.921e-26
5859084	2		82.3119	0.718204	-0.143752	228	0.0422549		TGCAGTCAAATAAATATACCATCGTAACGTGTCTTAC	5859084	3.6609e-13		0	999		0	999		0	999		0	0	999		0	999
5854751	2		82.3119	0.722804	-0.14098	228	0.0408275		TGCAGTCACCCAACTAGTATGGTGCCTCCTTGCATTACGTTCTCGCCACAAGTGATAAGTTGTCATTTG	5854751	1.52834e-30	LFQT01005949.1_Scaffold00162	81332	8.49476e-29		0	999		0	999		0	0	999	CM004494.1_chromosome_B4	16286300	3.6593e-29
19818773	2		82.3119	0.743501	-0.128719	228	0.0347423		TGCAGAAAATCTGTTAGTCTCTAAAGACGTCATTAGGATCACTGATCTTGGCCTGGACCGAGAGGTCAA	19818773	1.52834e-30		0	999	C5	29114587	7.53503e-17	NC_027752.1_chromosome_C5	29114587	7.54017e-17	chrC05	27055247	1	1.28417e-16		0	999
5866150|F|0--12:T>C	2		82.3119	0.744056	-0.128395	228	0.0345868		TGCAGGCTTCTGTATGAATGTAGCAATCTTGCTTCTCAACTCCTATGCGCATGCTTCATCAAAGAAATT	5866150	1.52834e-30	LFQT01005248.1_Scaffold00890	20207	3.98029e-22		0	999		0	999		0	0	999	LFLV01001915.1scaffold_325.1	108292	1.71459e-22
5832539	2		82.3119	0.745047	-0.127816	228	0.0343096		TGCAGCTAAGGTATCACGGTCGCTATCTTGCCTAGCAAGAGATGAACGAGGTCTCGGCTTTAGAAACCT	5832539	1.52834e-30		0	999		0	999		0	999		0	0	999		0	999
5857211|F|0--5:C>A	2		82.3119	0.75051	-0.124644	228	0.0328047		TGCAGCTATCTAAAACAGTCCACAAAAAAATATATATTAC		999		0	999		0	999		0	999		0	0	999		0	999
5864507	2		82.3119	0.752195	-0.123669	228	0.0323478		TGCAGAAATGCATTCTTGACGTCGACCCAGGATGTAAGAGATCCTGGTGATAACTGCTTAC	5864507	3.72679e-26	LFQT01004030.1_Scaffold00911	19078	3.2566e-22		0	999		0	999		0	0	999	LFLV01002145.1scaffold_2687.1	732	6.55906e-21
5865710	2		82.3119	0.752448	-0.123524	228	0.0322798		TGCAGACAATGTTCCTCCGTATGAAGCTTTCGACCTGAGAGTCTTTAC	5865710	4.28913e-19	CM007196.1_chromosome_B2	26323426	1.70227e-13		0	999		0	999		0	0	999		0	999
5853682	2		82.3119	0.753665	-0.122822	228	0.0319524		TGCAGGATTCAAAATGGATGAACATGATTTCCCACCGAGGCAATATACTGTAGGGCAGGAGCCAGTGCC	5853682	1.52834e-30	LFQT01005299.1_Scaffold00348	9689	8.49476e-29		0	999		0	999		0	0	999		0	999
5865728	2		82.3119	0.755594	-0.121712	228	0.0314374		TGCAGCTCAGAGATAGAACGCTTGACTAAGGACCTAGCCTAGTCATGGGAAGCGAAGAAGAGGTCGGAG	5865728	1.52834e-30	LFQT01004992.1_Scaffold00219	792	3.95223e-27		0	999		0	999		0	0	999	LFLV01001326.1scaffold_982.1	10871	7.921e-26
5837475	2		82.3119	0.765451	-0.116082	228	0.0288771		TGCAGGCTGGCCCCTATGAAACCGTATCTGAGCTGGCTGGAGCCGATCAAGGCCCAAAAAAAAGACGTA	5837475	1.52834e-30	CM007202.1_chromosome_B8	16914414	3.95223e-27		0	999		0	999		0	0	999		0	999
5843185	2		82.3119	0.787133	-0.103952	228	0.0236584		TGCAGCCATCTTTCATGTCTCAAATGCTCTATCGAGTGAGTTAC	5843185	6.15192e-17	LFQT01002531.1_Scaffold00394	78150	1.09661e-14	C5	26174623	1.21303e-11	NC_027752.1_chromosome_C5	26174623	1.21386e-11	chrAnn_random	35614221	5	3.51305e-14	LFLV01001641.1scaffold_1270.1	24086	4.84985e-15
5863751	2		82.3119	0.801088	-0.0963197	228	0.0205933		TGCAGAAGCTAGAGTGCAGAATTGGAGGTGATTGATGATCATGTTTAC	5863751	4.28913e-19		0	999		0	999		0	999		0	0	999	CM004497.1_chromosome_B7	7716661	3.3123e-17
5865678	2		82.3119	0.810144	-0.091438	228	0.0187251		TGCAGAGAATCGCTTCCACAATCAGACAATACCCACCATCACTCTCCACATTGTCTTAC	5865678	4.58575e-25	CM007202.1_chromosome_B8	16667685	3.97864e-21		0	999		0	999		0	0	999	LFLV01000199.1scaffold_10.1	2740398	1.72509e-21
5863541	2		82.3119	0.82026	-0.0860484	228	0.0167487		TGCAGTCTCTATAAAGCTCAAAGGATTCAGAGGAAGATGGACCGAGACAAAATGGATCATCTGTAAAGA	5863541	1.52834e-30	LFQT01007148.1_Scaffold00090	252508	1.83879e-25		0	999		0	999	chrA03_random	4452298	1	9.85725e-23	CM004494.1_chromosome_B4	18269908	7.921e-26
5846744	2		82.3119	0.82422	-0.0839568	228	0.0160066		TGCAGTGTAACGTCCAGGCGGAAACCATTAC	5846744	5.28297e-10		0	999		0	999		0	999		0	0	999		0	999
5859078	2		82.3119	0.832794	-0.0794625	228	0.0144602		TGCAGGCCGCCCACTCTCCTTTGCAGGACGATAGTCTGGCCTACTTTAC	5859078	5.7465e-18	LFQT01006106.1_Scaffold00813	593	7.91981e-12		0	999		0	999		0	0	999	CM004496.1_chromosome_B6	11753276	3.47481e-12
5864613	2		82.3119	0.836866	-0.0773442	228	0.0137545		TGCAGGCTCTTTTGGATCTGTTCCAATATTTCCCACATGCTTTAC	5864613	8.28959e-16	LFQT01002030.1_Scaffold00434	46145	1.48949e-13	C6	28166347	3.54131e-12	NC_027753.1_chromosome_C6	11656085	3.54373e-12	chrC06	9282969	2	6.1725e-12	CM004495.1_chromosome_B5	9985814	6.57242e-14
5855288|F|0--67:G>T	2		82.3119	0.843765	-0.0737784	228	0.0126007		TGCAGTGTTGTCCAGGAACCAATACTTACTCGCGTGAAAGGTATGACGATTTCAGTTGTTTGACTCTGA	5855288	1.52834e-30	LFQT01004234.1_Scaffold00405	55693	8.49476e-29		0	999		0	999		0	0	999	CM004494.1_chromosome_B4	17308563	1.70251e-27
5846766	2		82.3119	0.845428	-0.0729235	228	0.0123305		TGCAGTTCCAATGACAAGACGTACGGTGGCATGTTTAC	5846766	1.07441e-13		0	999		0	999		0	999		0	0	999		0	999
5837257	2		82.3119	0.848332	-0.0714341	228	0.0118658		TGCAGCAGGAGGGAAAAACACAAATGCCAAAGCATCACGTAAAAATTCCAAAAAGGTTGTTATCAATCA	5837257	1.52834e-30	LFQT01009470.1_Scaffold00003	957515	8.49476e-29	C9	7006948	1.60813e-23	NC_027756.1_chromosome_C9	7006948	1.60923e-23	chrC09	5440448	2	7.62012e-24	LFLV01001741.1scaffold_753.1	35671	1.31612e-28
5846561	2		82.3119	0.889967	-0.0506259	228	0.00620902		TGCAGCGGTCCCTTCGGGAGTATCCTGGTCAGGTTCTGGCTCGGAATAGCTCTTTAC	5846561	5.62783e-24	LFQT01000456.1_Scaffold01915	7084	4.84395e-20		0	999		0	999		0	0	999	CM004492.1_chromosome_B2	7545793	2.10402e-20
5843083	2		82.3119	0.892423	-0.0494293	228	0.00593328		TGCAGCATCTGATCTCCTGGTCATCTTTCCTGGTCTGCGCGTTCTTTTAC	5843083	3.55254e-20	LFQT01009510.1_Scaffold00252	18289	6.33253e-18		0	999		0	999		0	0	999	CM004497.1_chromosome_B7	7712773	1.29059e-16
5843349	2		82.3119	0.89547	-0.0479489	228	0.00559998		TGCAGCGGAGAAAAAATAAACACATGATTCATTGAAAAAATATTTAC	5843349	1.48755e-18		0	999		0	999		0	999		0	0	999		0	999
5858443	2		82.3119	0.899968	-0.0457727	228	0.00512587		TGCAGTAGTCTTGTGTTCTGGTAAATCAGTAGATACGATAGGCGCAATGTTAC	5858443	8.39926e-22	LFQT01008267.1_Scaffold00221	36828	1.52442e-19		0	999		0	999		0	0	999		0	999
5865102	2		82.3119	0.899986	-0.0457644	228	0.00512411		TGCAGTCAACTCAACTACCTATTGCAATCACCCCCTCTCTCTCTTTATCTCTCCGAATCTTTAC	5865102	8.59634e-28	LFQT01007121.1_Scaffold00107	157410	7.58291e-24		0	999		0	999		0	0	999	LFLV01001491.1scaffold_1396.1	26021	3.27581e-24
14756932	2		82.3119	0.907675	-0.0420697	228	0.00436306		TGCAGATCAAGTCCTTCTCTATAACTCTAGGCTGAAGTTGTTTCCAGGGAAGCTCAAGTCAAGATGGTC	14756932	1.52834e-30	LFQT01006060.1_Scaffold01162	18855	1.83879e-25	C5	30617407	7.48191e-22	NC_027752.1_chromosome_C5	30617407	7.48701e-22	chrCnn_random	26170953	3	1.27512e-21	LFLV01002217.1scaffold_1660.1	1348	7.921e-26
5830621	2		82.3119	0.909908	-0.0410023	228	0.00415362		TGCAGACTAAAATGATCTTCTTTTTTCGTTCTCGTCTACGATTATGTTTTCCTCTTTTTCTCACATCTG	5830621	1.52834e-30	LFQT01002030.1_Scaffold00434	75433	3.95223e-27		0	999		0	999		0	0	999		0	999
5846302	2		82.3119	0.943274	-0.025362	228	0.00164245		TGCAGAAAGTTCCTGCGAAAAGTTATTTGCAACGAATGTTATTAC	5846302	1.78173e-17	LFQT01009470.1_Scaffold00003	957581	3.20144e-15		0	999		0	999	chrA09	4059830	1	1.0256e-14	LFLV01001741.1scaffold_753.1	35628	3.05785e-12
5834136	2		82.3119	0.944499	-0.0247987	228	0.0015722		TGCAGTATGCTCATCACACTCGTAGATCAAGCTCACCAGCATGAAGTGCTTGCTCGAACTCTCGAGGCT	5834136	1.52834e-30	LFQT01002891.1_Scaffold00102	170937	1.83879e-25		0	999		0	999		0	0	999	CM004494.1_chromosome_B4	17137569	3.68528e-24
5863006	2		82.3119	0.953296	-0.0207721	228	0.00111274		TGCAGATCATCAGAAAGGCATCGATTGACCTGCTGTCACAAGTATCGATCGATGCGCCTCTAGTAAGCT	5863006	1.52834e-30	LFQT01005039.1_Scaffold00322	21136	3.95223e-27		0	999		0	999		0	0	999		0	999
5865729	2		82.3119	0.966118	-0.01497	228	0.000585332		TGCAGCTCAGAAATAGAACGCTTGACTAAGAACCTAGCCGAGTCACGGGAAGCAAAGAAGAAGTCGGAG	5865729	1.52834e-30	LFQT01003305.1_Scaffold00384	68702	8.55507e-24		0	999		0	999		0	0	999	LFLV01002464.1scaffold_788.1	97817	1.71459e-22
5856213	2		82.3119	0.96972	-0.0133535	228	0.000467416		TGCAGCCCTTTTTCTCTTGTAATTCTCCCAGGCTTTGAATCCTTATTTTTCTTTGGTGGGTTTTTACAG	5856213	1.52834e-30	CM007190.1_chromosome_A6	36101384	8.55507e-24		0	999		0	999	chrA05	9086123	1	1.66118e-15	LFLV01002232.1scaffold_159.1	107361	1.32546e-23
5837274	2		82.3119	0.970386	-0.0130556	228	0.000447093		TGCAGCATCTTCGATTCCTGTAAAGAAAAAAATCTAACTTGAGCACAAGACACTGTAAAAGGAATATGT	5837274	1.52834e-30		0	999		0	999		0	999		0	0	999		0	999
5864869	2		82.3119	0.974602	-0.0111727	228	0.000328806		TGCAGTGTTCCAAAATACGCCCAACGCAGCCGTCTCTACGGTCACTTTATGTTGTGCAGCCATCTAACG	5864869	1.52834e-30	LFQT01002891.1_Scaffold00102	199131	8.49476e-29		0	999		0	999		0	0	999	CM004494.1_chromosome_B4	17131979	1.71459e-22
19818935	2		82.3119	0.975304	-0.0108599	228	0.000310871		TGCAGCAACTCTCTCTGCTTCGATCCGAGTTCTCTCTCTCTCTCTCTCTCTCTCTCTTTGCTTACTTAC	19818935	1.52834e-30	CM007200.1_chromosome_B6	6686478	6.61348e-25		0	999		0	999		0	0	999	CM004498.1_chromosome_B8	5600259	3.71145e-19
5842158	2		82.3119	0.98737	-0.00552009	228	8.13e-05		TGCAGAGAGGGAAGAAAGATGAAATAAAATGCTCTGCCGCTTAC	5842158	6.15192e-17	CM007196.1_chromosome_B2	38915704	1.09661e-14		0	999		0	999		0	0	999		0	999
5850658|F|0--57:C>T	2		82.6273	0.110025	-0.95851	228	0.833168		TGCAGAGATCACTAAACTTGAAGAAACTCTTCGCTTAGAGCAAGAGAAAAATCGGACCTTGGAGCATGA	5850658	1.52834e-30	LFQT01004890.1_Scaffold01916	2374	3.95223e-27		0	999		0	999		0	0	999	CM004494.1_chromosome_B4	16132325	1.70251e-27
5839672	2		82.6273	0.237007	-0.625238	228	0.455012		TGCAGCTGATCGCCATCGTCGTGACTTACAATTCAAGGCTGGAGATCGTGTATGGGCGGTTTTAC	5839672	2.44442e-28		0	999		0	999		0	999		0	0	999	LFLV01000948.1scaffold_983.1	54479	2.00657e-26
14792829	2		82.6273	0.253552	-0.595932	228	0.424113		TGCAGCCTCAACACCAACGTCAACTGGGTAGCCAAGAGAGATGAGTTAC	14792829	1.23513e-19	LFQT01002108.1_Scaffold00013	1244191	2.202e-12		0	999		0	999		0	0	999	LFLV01000948.1scaffold_983.1	14045	9.59315e-18
5833173	2		82.6273	0.255443	-0.592706	228	0.420741		TGCAGGAGAAGGTGGTACAAAATGTGGCTAGAGGATCCATCACAGATCTTGCCGCTGTCAAGTTACAGA	5833173	1.52834e-30	LFQT01002108.1_Scaffold00013	48364	3.07695e-23		0	999		0	999		0	0	999	LFLV01002230.1scaffold_1806.1	11787	6.12331e-27
5856212	2		82.6273	0.262332	-0.581148	228	0.408709		TGCAGCCCTTTTTCTCTTGTAATTCTCCCAGGCTTTGAATCCTTATTTTGGTTTGGTGGGTTTTTACAG	5856212	1.52834e-30	CM007190.1_chromosome_A6	36101384	3.95223e-27		0	999		0	999	chrA05	9086123	1	3.57047e-17	LFLV01002232.1scaffold_159.1	107361	6.12331e-27
5842674	2		82.6273	0.263272	-0.579595	228	0.407098		TGCAGATTCGAACTGCTTCAGATCTGTCTTAC	5842674	1.59127e-10	CM007195.1_chromosome_B1	13483276	2.31224e-08		0	999		0	999		0	0	999		0	999
5865843|F|0--9:A>G	2		82.6273	0.271644	-0.565999	228	0.393059		TGCAGACATAGAGTCCCATACGAAATCGTAACAGACAACGGATCCCGGTTCATCTCTACTCGATTTGAA	5865843	1.52834e-30	LFQT01002500.1_Scaffold03740	1119	1.83879e-25		0	999		0	999		0	0	999	CM004494.1_chromosome_B4	16645126	1.70251e-27
5848064	2		82.6273	0.273202	-0.563516	228	0.390506		TGCAGCATCATCAGGATCAGGGATTACAGCTCCTTAC	5848064	3.6609e-13	CM007202.1_chromosome_B8	29176119	2.58188e-09		0	999		0	999		0	0	999		0	999
5836236	2		82.6273	0.280735	-0.551703	228	0.378417		TGCAGGACCTGTCAACGCCGTGGGATAAGTTTCTCAGCGGCTTCAATGGCTGTAGACATGATTTACAGA	5836236	1.52834e-30	CM007199.1_chromosome_B5	35329464	1.85185e-20		0	999		0	999		0	0	999	CM004496.1_chromosome_B6	20824395	3.71145e-19
5866073	2		82.6273	0.288843	-0.539338	228	0.365858		TGCAGTCAGCATCATGGCTATAGACACAGCTGAAGTATTTGGATTAC	5866073	1.48755e-18	CM007199.1_chromosome_B5	32599488	1.26111e-14		0	999		0	999		0	0	999	CM004493.1_chromosome_B3	15665303	2.57876e-13
5866149|F|0--11:G>A	2		82.6273	0.293109	-0.53297	228	0.359428		TGCAGGCTTTTGCATGAATGTAGCAATCTTGCTTCTCAACTCTTTTGCATGTGCCTCATCAAAGAAATT	5866149	1.52834e-30	LFQT01007686.1_Scaffold00888	9181	1.83879e-25		0	999		0	999		0	0	999	CM004494.1_chromosome_B4	18773498	3.6593e-29
5848065	2		82.6273	0.304668	-0.516173	228	0.342598		TGCAGCCACAGCCGTGTACTTGATAAACCGCTCACCATCTTCAGCTTTGGACTTTAC	5848065	5.62783e-24	LFQT01002531.1_Scaffold00394	24042	1.04114e-21		0	999		0	999		0	0	999	CM004494.1_chromosome_B4	16005960	4.5223e-22
5855036	2		82.6273	0.32633	-0.486343	228	0.313192		TGCAGTGAGCGGATGTCTGAAAGTGGGAAGACATTGGACTTTTTTTTTTGAATAAAATGTTAC	5855036	3.02152e-27		0	999		0	999		0	999		0	0	999	CM004498.1_chromosome_B8	11986841	1.14873e-23
5855555|F|0--13:T>C	2		82.6273	0.333976	-0.476285	228	0.303424		TGCAGTTGTTCAATTCACATACCAATATATTCCTGAGGTTTCTTAGCGAGAAACTCGTGGAAGAACCTT	5855555	1.52834e-30	LFQT01003305.1_Scaffold00384	5536	8.49476e-29		0	999		0	999		0	0	999	LFLV01000497.1scaffold_434.1	27921	7.921e-26
5859949	2		82.6273	0.336998	-0.472373	228	0.299645		TGCAGATGTCCTTTCATCGATCTCAGCACCATATCCGTTCATGCGATGGTCGATAAACATAGTTACAGA	5859949	1.52834e-30	LFQT01006334.1_Scaffold00281	27637	3.07695e-23		0	999		0	999		0	0	999	LFLV01001087.1scaffold_1065.1	27156	6.12331e-27
5865792|F|0--19:T>G	2		82.6273	0.340651	-0.46769	228	0.295137		TGCAGCATTTGGACCCGGATCGCGAGATGCCCACACCCAACCCTGGATCTCTCTTTTCCCAGCAACTGG	5865792	1.52834e-30	LFQT01006177.1_Scaffold00329	16509	3.95223e-27		0	999		0	999		0	0	999	LFLV01000734.1scaffold_628.1	100332	3.6593e-29
19818923	2		82.6273	0.357924	-0.446209	228	0.274681		TGCAGTTCTACCAGCAAGACAAGATACAATTTCCCCGGAGCACACCAGAGAGAGACCGTTCAGGCTTAC	19818923	1.52834e-30		0	999		0	999		0	999		0	0	999	LFLV01000981.1scaffold_648.1	738	1.31612e-28
5865544|F|0--9:C>T	2		82.6273	0.361791	-0.441542	228	0.270287		TGCAGCGTTCCTTAGAAAGGAACAGATAAATGAGGTACAAGCTACACTTGACAATTTTAC	5865544	1.3077e-25	LFQT01009529.1_Scaffold01016	9687	5.29807e-20		0	999		0	999		0	0	999	CM004494.1_chromosome_B4	2697997	8.25536e-20
5833345	2		82.6273	0.36618	-0.436306	228	0.265377		TGCAGGCATCGTCCTGTCCAAGATCACAATCAGATCTACAGGCATCGGCCTGTCCAAGATCATCAATCA	5833345	1.52834e-30	LFQT01002348.1_Scaffold00593	44361	1.83879e-25		0	999		0	999		0	0	999	LFLV01000238.1scaffold_1667.1	12152	2.8489e-25
5841734	2		82.6273	0.372687	-0.428655	228	0.258246		TGCAGAAGCTGTTCATAAGGTCCTCTGCTTGATTTCATTCACATTAC	5841734	1.48755e-18	LFQT01002329.1_Scaffold07397	1102	2.71057e-16		0	999		0	999		0	0	999	LFLV01002390.1scaffold_1332.1	11646	1.19132e-16
5851235	2		82.6273	0.385692	-0.41376	228	0.244509		TGCAGATCATCAGAAAGGCATCGATCGAACTGCTGTTGCACGTATCGATCAATATAGCCTCACGACAAT	5851235	1.52834e-30	LFQT01007686.1_Scaffold00888	10555	1.83879e-25		0	999		0	999		0	0	999	CM004494.1_chromosome_B4	13128024	3.6593e-29
5853734|F|0--25:C>T	2		82.6273	0.390376	-0.408517	228	0.239721		TGCAGGCAGGCTCTACTTCCTTTCCCCTTCTGATGAGGAGATCAGAGACCGGGAGTGCACTATTACAGA	5853734	1.52834e-30	LFQT01004509.1_Scaffold00123	101441	1.42147e-26		0	999		0	999		0	0	999	LFLV01001524.1scaffold_642.1	40976	2.8489e-25
5863229|F|0--27:T>A	2		82.6273	0.394186	-0.404298	228	0.235886		TGCAGCGGTGTATCATTGGTCCTAGTATTAGATAACCCAGAAAATGACAGTTACGGTTATTTTTACAGA	5863229	7.11069e-29	LFQT01004661.1_Scaffold00007	3769	8.55507e-24		0	999		0	999		0	0	999	LFLV01000795.1scaffold_2105.1	8728	6.12331e-27
5854570|F|0--37:G>A	2		82.6273	0.397291	-0.400891	228	0.232801		TGCAGTAGATTATGTCTCCAAATGGGTTGAAGCACTCGCTTCCCCGACAAGCAATGCAGCTTTGGTTGT	5854570	1.52834e-30	LFQT01006766.1_Scaffold00256	121652	3.95223e-27		0	999		0	999		0	0	999	LFLV01000628.1scaffold_1328.1	27980	1.70251e-27
5864598|F|0--17:A>C	2		82.6273	0.421543	-0.375158	228	0.209862		TGCAGCTCATCTCAGCTAATGGAAAGCTTGCATCTTCCAAATGTAAGAATACATTAC	5864598	5.62783e-24	LFQT01006140.1_Scaffold00303	66878	4.84395e-20	C6	30246758	1.18767e-18	NC_027753.1_chromosome_C6	9575662	1.18848e-18	chrCnn_random	37631013	3	2.00738e-18	LFLV01002232.1scaffold_159.1	518577	2.10402e-20
5855276|F|0--47:G>C	2		82.6273	0.427044	-0.369527	228	0.20493		TGCAGTGTGGGACGGGCATCGAAAATCAATGAGTTCAGAGAGAATTGGTGCTGTTCCAAAGTGAAAAGG	5855276	1.52834e-30	LFQT01006177.1_Scaffold00329	75941	8.49476e-29		0	999		0	999		0	0	999	LFLV01000734.1scaffold_628.1	22339	1.70251e-27
5866194|F|0--43:A>G	2		82.6273	0.434664	-0.361846	228	0.198256		TGCAGAAGGATAGATTCAAACTAGAGCTTCTTTGCTTCATATAACCAGTGTACTCTCTAGAACAATTGG	5866194	1.52834e-30	LFQT01005385.1_Scaffold01041	16893	1.83879e-25		0	999		0	999		0	0	999	LFLV01001011.1scaffold_599.1	43853	7.921e-26
5866009	2		82.6273	0.440141	-0.356409	228	0.193568		TGCAGCCTCAACAGCAACATCAACTGGGTGACCAAGAGAGGTGAATTAC	5866009	1.23513e-19	CM007193.1_chromosome_A9	42755762	2.18648e-17		0	999		0	999		0	0	999	LFLV01001477.1scaffold_584.1	2890	4.46326e-16
5858639	2		82.6273	0.441442	-0.355126	228	0.192467		TGCAGTGGACGTTGCTGGAACTTTCACTTCGAAAATTGTTAC	5858639	7.29484e-16	LFQT01008267.1_Scaffold00221	98838	5.93992e-12		0	999		0	999		0	0	999		0	999
5850238|F|0--34:G>A	2		82.6273	0.445472	-0.35118	228	0.189089		TGCAGACACGGGAAGAAGATGATGGAAATCTGTGGACGAGATATCTAGTACATATAATTTGAAAACAAT	5850238	1.52834e-30	LFQT01004992.1_Scaffold00219	105300	8.49476e-29		0	999		0	999		0	0	999	CM004494.1_chromosome_B4	16802441	1.70251e-27
5836115	2		82.6273	0.463445	-0.334002	228	0.17459		TGCAGCTGATTCAGAGCACATCACCCCTCCTTCTAGCGCCAAACTGTGGGAACCGAAATTTACACCTTC	5836115	1.52834e-30	LFQT01004865.1_Scaffold01299	6294	3.98029e-22		0	999		0	999		0	0	999	LFLV01000768.1scaffold_2148.1	2136	3.6593e-29
5862706	2		82.6273	0.467317	-0.330388	228	0.171583		TGCAGAGACATCCCCAAGTTCTGCAAAAGATTTAC	5862706	4.20948e-12	LFQT01007498.1_Scaffold00131	128563	6.07419e-10		0	999		0	999		0	0	999		0	999
5858482|F|0--45:A>G	2		82.6273	0.479846	-0.318898	228	0.162121		TGCAGTATGGTGCTCGGTGAACTCTGTTATGGCATTTTTGTTTGCACTTAC	14759781	1.02066e-20	LFQT01003570.1_Scaffold00414	82221	5.09116e-19		0	999		0	999		0	0	999	LFLV01001872.1scaffold_706.1	20963	8.00924e-19
5839108	2		82.6273	0.480485	-0.318321	228	0.16165		TGCAGATTTTGATACCATATAGGTCTATCTTTCGATCCGAACACAAAACGATCAAACATGAACTGGAAA	5839108	1.52834e-30	LFQT01003305.1_Scaffold00384	26187	1.42147e-26		0	999		0	999		0	0	999	LFLV01000497.1scaffold_434.1	18228	3.6593e-29
5865912|F|0--33:A>T	2		82.6273	0.488988	-0.310701	228	0.155469		TGCAGCAACTTTGGACCGTCTATCCCGTCAGGTAATCTCATAATCACTGGTTCATTGTGTTTAC	5865912	8.59634e-28		0	999		0	999		0	999		0	0	999	CM004496.1_chromosome_B6	1449316	1.52408e-22
5865533	2		82.6273	0.493591	-0.306633	228	0.152199		TGCAGCAGAAGGATATGGTTGGCAGGGCAGGAGAGGCATTCAGGGTTTCGGATTTTAC	5865533	1.60704e-24	CM007197.1_chromosome_B3	66405399	1.38889e-20		0	999		0	999		0	0	999	LFLV01000817.1scaffold_271.1	102110	1.29547e-22
5836028	2		82.6273	0.496212	-0.304333	228	0.150359		TGCAGCGTTCCTTGGAAAGGAACAGATAAATGAGGCTTTGCGATGACAAATCGGCTTTCGTTTTGCCTG	5836028	1.52834e-30		0	999		0	999		0	999		0	0	999		0	999
5854740|F|0--5:T>G	2		82.6273	0.499848	-0.301162	228	0.147833		TGCAGTCAATTGCTCTACCACTGAGCTAAGGACCCTTTTGTTGGCTAGAGATGATTCATGAATTAGGCA	5854740	1.52834e-30	LFQT01006802.1_Scaffold00223	62661	8.49476e-29	Scaffold00534	223354	5.86629e-13	NW_013617419.1_UnpScaffold00534	223354	5.87029e-13	chrCnn_random	76656511	3	7.72871e-14		0	999
5853496|F|0--48:C>T	2		82.6273	0.504663	-0.296999	228	0.144536		TGCAGGACTTGGACCCAGACCGCGACATGCCGATGCCCAACCTGGGATCTTTCTTTGCTCAGCACCTAG	5853496	1.52834e-30	LFQT01008260.1_Scaffold00489	2948	8.49476e-29		0	999		0	999		0	0	999	CM004494.1_chromosome_B4	14348973	1.70251e-27
5865400|F|0--11:T>G	2		82.6273	0.51028	-0.292191	228	0.140758		TGCAGACCTCTTTTCCTCTAGGAAGGATCGAACAATTCTTTAC	5865400	2.12043e-16	LFQT01000642.1_Scaffold01184	15202	1.74327e-12		0	999		0	999		0	0	999		0	999
5832806	2		82.6273	0.518586	-0.285179	228	0.135302		TGCAGCTGGAGTCTCACACATTGAAGCTCCATGTTCCACAAGTTTATCACACTGTACAAAGGGAGGGTA	5832806	1.52834e-30	LFQT01001110.1_Scaffold01134	19796	3.95223e-27		0	999		0	999		0	0	999	LFLV01002431.1scaffold_987.1	16765	3.6593e-29
5866080|F|0--17:A>G	2		82.6273	0.530503	-0.275312	228	0.127737		TGCAGTCTCCGGAACAGAGCGCTGGTAAGTTTGCCGGAAAGTTTCGGAGGATCCTCAATAACTGCAAGC	5866080	1.52834e-30	LFQT01004871.1_Scaffold00301	28658	1.83879e-25		0	999		0	999		0	0	999	LFLV01000940.1scaffold_903.1	26653	7.921e-26
5863978|F|0--26:C>T	2		82.6273	0.530553	-0.275271	228	0.127706		TGCAGTAACACAACACTTTGAGTTTGCGTACTTATGTACTTAC	5863978	2.12043e-16		0	999		0	999		0	999		0	0	999		0	999
5860461	2		82.6273	0.531853	-0.274209	228	0.1269		TGCAGCGTGCTGGTAATTTTGAATTCGAATGAGCGCCTGGTCGGGGCGTTCATTGATAAGATCGAGATT	5860461	1.52834e-30	LFQT01006298.1_Scaffold00421	1999	1.42147e-26		0	999		0	999	chrAnn_random	30142705	1	2.16412e-09	LFLV01002480.1scaffold_858.1	66989	6.12331e-27
5864587	2		82.6273	0.536174	-0.270695	228	0.124244		TGCAGCGGTTCGGTCTTCTGACTGCATTAC	5864587	1.74175e-09	LFQT01006177.1_Scaffold00329	15905	2.32639e-07		0	999		0	999		0	0	999	LFLV01000734.1scaffold_628.1	100975	1.11985e-07
5864396|F|0--19:T>G	2		82.6273	0.536721	-0.270252	228	0.123911		TGCAGTAATCCCGCGGACTTCTTGTTCTCCGACTTGTCCTGCTGGCATACATGACAAGTCTTAC	5864396	8.59634e-28	CM007202.1_chromosome_B8	18307251	3.52798e-22		0	999		0	999		0	0	999	CM004494.1_chromosome_B4	12327865	3.27581e-24
5846223	2		82.6273	0.539363	-0.268119	228	0.122309		TGCAGTTGACTCCAGGTGTTTGGAGCTGTGAAGAAAAAGAAAGGCAAGTTTTGTTTAC	5846223	1.60704e-24		0	999		0	999		0	999		0	0	999	LFLV01001752.1scaffold_975.1	51427	1.29547e-22
5863004	2		82.6273	0.548124	-0.261121	228	0.117099		TGCAGATCATCAGAAAGGCATCGATCGACCTGCTGTCGCAAGTATCGATCAATGCGCCTCTAGTAAGCT	5863004	1.52834e-30	LFQT01007686.1_Scaffold00888	10555	3.0988e-18		0	999		0	999		0	0	999	LFLV01000795.1scaffold_2105.1	8662	3.6593e-29
5845008	2		82.6273	0.548345	-0.260946	228	0.11697		TGCAGTTCGATCCTCGTTGGCTATCAGATAATTTAC	5845008	1.24354e-12	CM007190.1_chromosome_A6	35997787	8.57178e-09		0	999		0	999		0	0	999		0	999
5835854	2		82.6273	0.562968	-0.249516	228	0.10862		TGCAGCAGAGAGTGACGATCGCAGGCTCCTTTCGCGGCTAAGAGACGGTTGCGGCCGTGGGTCGAAACA	5835854	1.52834e-30	LFQT01006177.1_Scaffold00329	55739	3.95223e-27		0	999		0	999		0	0	999	LFLV01000734.1scaffold_628.1	46409	3.6593e-29
5848052	2		82.6273	0.574961	-0.240362	228	0.102078		TGCAGATCTCAATAGGCCTAAAAGTGACAAAGCTTTAC	5848052	1.07441e-13		0	999		0	999		0	999		0	0	999		0	999
14792634|F|0--22:C>T	2		82.6273	0.578569	-0.237645	228	0.100162		TGCAGCAACTTTGGACCGTCTACCCCGTCAGGTTATCTCATTATCACTGGTTCATTGTGTTTAC	14792634	3.99949e-26		0	999		0	999		0	999		0	0	999	CM004496.1_chromosome_B6	1449316	3.27581e-24
5861526|F|0--19:A>G	2		82.6273	0.579465	-0.236973	228	0.0996898		TGCAGTGGCAGTTACATCTAGAGAGGAGAATGACGGTGAGGATGATGTCCCTGAGGATAAGGGTTCGGA	5861526	1.52834e-30	LFQT01005299.1_Scaffold00348	12035	8.49476e-29	C4	35675840	9.61023e-26	NC_027751.1_chromosome_C4	35675840	9.61678e-26	chrA04	7250881	2	3.5453e-22	CM004494.1_chromosome_B4	16686042	7.921e-26
5839643	2		82.6273	0.581138	-0.235721	228	0.0988118		TGCAGATTTTTCTACTTTTCTTGCTGATATATCAGAGAGCTGTTTCTGAGCCTCTTGTGAAGGCTTTCA	5839643	1.52834e-30	LFQT01005949.1_Scaffold00162	124074	8.49476e-29		0	999		0	999		0	0	999	CM004494.1_chromosome_B4	16107646	3.6593e-29
5863264|F|0--29:C>T	2		82.6273	0.594896	-0.225559	228	0.0917842		TGCAGCTCGAAGTGCGTCCCATATCTCTGCAATTACCATTGTGTAAGATACAAACATGGATATTACAGA	5863264	1.52834e-30	LFQT01006802.1_Scaffold00223	63001	1.42147e-26	C6	32168476	7.58852e-12	NC_027753.1_chromosome_C6	7653932	7.5937e-12	chrC06	6823833	1	1.29329e-11	LFLV01001644.1scaffold_344.1	137538	6.12331e-27
5845957	2		82.6273	0.601537	-0.220738	228	0.0885108		TGCAGGGTTTTGTGAGAGAGCAGGGAATAGGTGTGGGTCCCAGTTAC	5845957	1.48755e-18		0	999		0	999		0	999		0	0	999	LFLV01001752.1scaffold_975.1	48606	1.19132e-16
5864504	2		82.6273	0.606269	-0.217335	228	0.0862245		TGCAGAAACGCATTCTTGATGTCGACCCAGGATGTAAGAGATCCTGGTGATAACTGCTTAC	5864504	3.72679e-26	LFQT01004030.1_Scaffold00911	19078	3.2566e-22		0	999		0	999		0	0	999	LFLV01002145.1scaffold_2687.1	732	3.03012e-24
5856480	2		82.6273	0.619439	-0.208002	228	0.0800581		TGCAGCTAAGGTATCATGGTTGTTATCTTTCCTACCAAGAGATGAAGGAGGACTCGGCTTTAGAAACCT	5856480	7.11069e-29	CM007202.1_chromosome_B8	15729175	1.83879e-25		0	999		0	999		0	0	999	CM004491.1_chromosome_B1	23018255	3.6593e-29
5832687	2		82.6273	0.620451	-0.207292	228	0.0795959		TGCAGCTCGATCCACATTCCTTCAAGAAACGGCGTATCAGTTCCTGTTTCCCCAGATAATGGTTTGTGA	5832687	1.52834e-30	LFQT01004992.1_Scaffold00219	100494	1.83879e-25		0	999		0	999		0	0	999	CM004494.1_chromosome_B4	16787585	3.6593e-29
5865400|F|0--19:A>C	2		82.6273	0.62942	-0.201059	228	0.0755737		TGCAGACCTCTTTTCCTCTAGGAAGGATCGAACAATTCTTTAC	5865400	2.12043e-16	LFQT01000642.1_Scaffold01184	15202	1.74327e-12		0	999		0	999		0	0	999		0	999
5865805	2		82.6273	0.63505	-0.197192	228	0.0731142		TGCAGTAAGTATCTTACCCAAGGTGATGGCAGACCATCTAGGTCTGAAGATAGAGCCTTCAGACGATTA	5865805	1.52834e-30	LFQT01006766.1_Scaffold00256	13363	8.49476e-29	C9	29555479	2.09502e-17	NC_027756.1_chromosome_C9	29555479	2.09645e-17	chrC09	27078840	13	3.57047e-17	CM004494.1_chromosome_B4	18142642	3.6593e-29
5856879	2		82.6273	0.63757	-0.195472	228	0.0720299		TGCAGACAACGGACTTCGGAAGCCTTGGCTCTCCTCTCTTTCTTCATCTTAC	5856879	2.92937e-21	LFQT01002169.1_Scaffold00050	11638	1.14443e-15		0	999		0	999		0	0	999	LFLV01000817.1scaffold_271.1	174935	2.30934e-19
5862332	2		82.6273	0.644018	-0.191102	228	0.0692994		TGCAGCTCAGGTGATGTGATAGATTGTGCTTTTGGTGTGTTATTGGTGTACACTTGTTAC	5862332	6.08414e-24	CM007196.1_chromosome_B2	28488318	1.13875e-21		0	999		0	999		0	0	999	LFLV01000626.1scaffold_923.1	73549	1.06037e-23
5865792	2		82.6273	0.650356	-0.186849	228	0.0666777		TGCAGCATTTGGACCCGGATCGCGAGATGCCCACACCCAACCCTGGATCTCTCTTTTCCCAGCAACTGG	5865792	1.52834e-30	LFQT01006177.1_Scaffold00329	16509	3.95223e-27		0	999		0	999		0	0	999	LFLV01000734.1scaffold_628.1	100332	3.6593e-29
5831715	2		82.6273	0.65039	-0.186826	228	0.0666638		TGCAGCAACTCTCTCTGCTTCGATCCGAGTACTCTCTCTCTCTCTCTCTCTCTTTGCTTACTTAC	5831715	2.44442e-28	CM007200.1_chromosome_B6	6686482	1.30142e-21		0	999		0	999		0	0	999	CM004498.1_chromosome_B8	5600263	2.00657e-26
5866064|F|0--15:G>T	2		82.6273	0.650462	-0.186778	228	0.0666344		TGCAGTCAGCATTATGGCTATAGACACTGCTGAATTATTAGGATTAC	5866064	1.48755e-18	LFQT01008157.1_Scaffold00485	64648	1.26111e-14		0	999		0	999		0	0	999	LFLV01002452.1scaffold_845.1	50449	1.19132e-16
5848051	2		82.6273	0.658049	-0.181742	228	0.0635771		TGCAGATCCAGAATAACATTGAAGCAACTGATCTTATAATGATGCAAATTGGTTAC	5848051	1.96942e-23	CM007202.1_chromosome_B8	15726380	3.62758e-21		0	999		0	999	chrC03	17554464	1	6.99419e-18	LFLV01001260.1scaffold_1007.1	1330	1.57722e-21
5845617	2		82.6273	0.663912	-0.17789	228	0.0612735		TGCAGCAACAATTGCATTTAGCGTTAGTTTAC	5845617	1.59127e-10		0	999		0	999		0	999		0	0	999	LFLV01000814.1scaffold_1654.1	14348	1.08212e-08
5858750	2		82.6273	0.668376	-0.174979	228	0.0595531		TGCAGTTCCCTCAATCTATCCCATGCCAAACTTGTACCAACTTAC	5858750	1.78173e-17	CM007197.1_chromosome_B3	52140184	1.48949e-13		0	999		0	999		0	0	999	CM004493.1_chromosome_B3	5739710	6.57242e-14
5866149|F|0--42:T>C	2		82.6273	0.672234	-0.17248	228	0.0580898		TGCAGGCTTTTGCATGAATGTAGCAATCTTGCTTCTCAACTCTTTTGCATGTGCCTCATCAAAGAAATT	5866149	1.52834e-30	LFQT01007686.1_Scaffold00888	9181	1.83879e-25		0	999		0	999		0	0	999	CM004494.1_chromosome_B4	18773498	3.6593e-29
5845266	2		82.6273	0.678358	-0.168541	228	0.0558108		TGCAGAAACAAATCAAGAAATTTTGGCTTTTGGGCTTGAGTTTTAC	5845266	5.15204e-18	LFQT01005145.1_Scaffold03404	3593	3.35389e-15		0	999		0	999		0	0	999	LFLV01000768.1scaffold_2148.1	2093	4.10623e-16
5865539|F|0--14:A>G	2		82.6273	0.682944	-0.165615	228	0.0541389		TGCAGCAAAAGGATATGGTTGGCAGGACAGGAGAGGCATTCAGGGTTTCGGAGTTTAC	5865539	1.60704e-24	LFQT01004168.1_Scaffold02175	2179	6.46186e-19		0	999		0	999		0	0	999	LFLV01000817.1scaffold_271.1	80327	2.8042e-19
5866011|F|0--42:T>G	2		82.6273	0.682944	-0.165615	228	0.0541389		TGCAGCCTCAACACCAACATCAACTGGGTAGCCAAGAGAGATTAGTTAC	5866011	1.23513e-19	LFQT01003985.1_Scaffold00312	98086	2.202e-12		0	999		0	999		0	0	999	LFLV01001913.1scaffold_1354.1	26024	4.46326e-16
5864505|F|0--22:T>C	2		82.6273	0.682944	-0.165615	228	0.0541389		TGCAGAAACGCATTCTTGACGTTGACCCAGGATGTAAGAGATCCTGGTGATAACTGCTTAC	5864505	3.72679e-26	LFQT01004030.1_Scaffold00911	19078	3.2566e-22		0	999		0	999		0	0	999	LFLV01000606.1scaffold_1258.1	16267	3.03012e-24
5859050|F|0--36:G>T	2		82.6273	0.683129	-0.165497	228	0.0540723		TGCAGAGGATATAGCTTTCCTGTAAAATTCAGGTCAGTAGCTTTTAC	5859050	1.48755e-18	LFQT01008267.1_Scaffold00221	126743	2.71057e-16	C6	22917225	3.87858e-12	NC_027753.1_chromosome_C6	16905205	3.88122e-12	chrA07	13107928	2	1.87963e-12	LFLV01000497.1scaffold_434.1	31615	5.54268e-15
5841862	2		82.6273	0.68447	-0.164646	228	0.0535894		TGCAGAATTCCTTGGAAAGGAGCAGATGGATGAAGTAAAAGCAAAGCTGGATAGTGTTAC	5841862	1.3077e-25	CM007199.1_chromosome_B5	24603928	2.44758e-23	C5	27335271	2.82448e-10	NC_027752.1_chromosome_C5	27335271	2.8264e-10	chrC05	24983532	2	4.78631e-10	LFLV01002507.1scaffold_944.1	57217	1.06037e-23
5865542	2		82.6273	0.686666	-0.163254	228	0.052804		TGCAGCGTTTTTTGGAAAGGAACAGATAAATGAGGTACAAGCTACACTTGACAATGTTAC	5865542	6.08414e-24	LFQT01002501.1_Scaffold00353	17232	4.09566e-21		0	999		0	999		0	0	999	CM004494.1_chromosome_B4	2697997	8.25536e-20
5866122	2		82.6273	0.699593	-0.155154	228	0.0483169		TGCAGGTCAATTGGTGACAGCTTGTCCTGTGGAAAAGTTGTTAC	5866122	2.86221e-15	CM007199.1_chromosome_B5	24679234	5.10204e-13		0	999		0	999	chrA06	11937408	8	2.11431e-11	LFLV01000581.1scaffold_668.1	92783	4.84985e-15
14792349	2		82.6273	0.702062	-0.153624	228	0.0474858		TGCAGAGAATCGTTTCCACAATCAGACAATACCCACCATCACTCTACATATTGTCTTAC	14792349	4.58575e-25	CM007202.1_chromosome_B8	16667685	4.00689e-16		0	999		0	999		0	0	999	LFLV01000199.1scaffold_10.1	2740398	1.73733e-16
5865320|F|0--40:G>T	2		82.6273	0.70426	-0.152267	228	0.046753		TGCAGGCATCGGTCTGTCCAAGATCACAATCAGATCTACAGGCATCGGCCTGTCCAAGATCATCACTGG	5865320	1.52834e-30	LFQT01005576.1_Scaffold01173	6124	5.11253e-26		0	999		0	999		0	0	999	LFLV01000238.1scaffold_1667.1	12152	1.70251e-27
5858416|F|0--17:C>G	2		82.6273	0.713006	-0.146907	228	0.0439016		TGCAGTACTCACCAATGCTCAGAATGTATTTCTTAC	5858416	1.24354e-12		0	999		0	999		0	999		0	0	999	CM004494.1_chromosome_B4	18119991	8.40674e-11
5858243|F|0--26:A>G	2		82.6273	0.7164	-0.144844	228	0.0428223		TGCAGGGTTTCTTACAATTGCCAGTGATCTTAC	5858243	4.76465e-11		0	999		0	999		0	999		0	0	999	CM004494.1_chromosome_B4	12473050	3.00867e-09
5836601	2		82.6273	0.721648	-0.141675	228	0.0411837		TGCAGTCAACTCAACTACCTATTGCAATCACCCCCTCTCTCTCTCTATCTCTCCGAATCTTTTAC	5836601	2.44442e-28	LFQT01007121.1_Scaffold00107	157409	6.01225e-25		0	999		0	999		0	0	999	LFLV01001491.1scaffold_1396.1	26020	2.59566e-25
5857891|F|0--32:C>A	2		82.6273	0.727327	-0.138271	228	0.0394507		TGCAGCTCTTTTGTAGTCCTTTTTGGCAAACGCACTCGCTAGTATTGCCTTTTAC	5857891	6.88654e-23	LFQT01008267.1_Scaffold00221	91376	1.26262e-20	C5	26781303	4.01273e-18	NC_027752.1_chromosome_C5	26781303	4.01547e-18	chrA08_random	359212	5	5.23242e-19	CM004491.1_chromosome_B1	2659606	1.97651e-20
5866064	2		82.6273	0.73173	-0.135649	228	0.0381357		TGCAGTCAGCATTATGGCTATAGACACTGCTGAATTATTAGGATTAC	5866064	1.48755e-18	LFQT01008157.1_Scaffold00485	64648	1.26111e-14		0	999		0	999		0	0	999	LFLV01002452.1scaffold_845.1	50449	1.19132e-16
5848089	2		82.6273	0.732484	-0.135202	228	0.0379131		TGCAGTCTTTCTGGAGTCTTTTGTCTCTAAAGAAATTATCTAACTTGTTATGTTTTAC	5848089	1.60704e-24		0	999		0	999		0	999		0	0	999	LFLV01002155.1scaffold_1770.1	10566	1.29547e-22
19818927	2		82.6273	0.740987	-0.13019	228	0.0354524		TGCAGTTCGTTTCAGTTTGTTATATTATTAC	19818927	5.28297e-10		0	999		0	999		0	999		0	0	999	LFLV01001752.1scaffold_975.1	51399	3.50279e-08
5853789|F|0--48:G>T	2		82.6273	0.741158	-0.130089	228	0.0354037		TGCAGGCGATCAGTGTCGTCCTCGTCTCATCGGTCAATTCTGGTACACGTCTACTCGGATCTTTTTTGA	5853789	1.52834e-30	LFQT01007801.1_Scaffold01155	23593	8.49476e-29		0	999		0	999		0	0	999	LFLV01000417.1scaffold_1134.1	44470	3.6593e-29
5862295	2		82.6273	0.742046	-0.129569	228	0.0351521		TGCAGTGAGCATAAGACATCATCTTGTAGATAGTAATCGCAAGGATTCGTCGGTTTTAC	5862295	2.13354e-23	LFQT01004336.1_Scaffold00898	33036	8.55153e-23		0	999		0	999		0	0	999	LFLV01000133.1scaffold_1427.1	27603	3.70783e-23
5838965	2		82.6273	0.749462	-0.12525	228	0.0330905		TGCAGCCTTGTCCTTTGCTGACGAGACTTGAAAGTTATCGTGGACCTATCCATGAATGTGAGCAAGAGA	5838965	1.52834e-30	LFQT01003438.1_Scaffold00646	13260	3.95223e-27		0	999		0	999		0	0	999	LFLV01000948.1scaffold_983.1	54413	3.6593e-29
5865843|F|0--26:C>T	2		82.6273	0.750017	-0.124929	228	0.0329389		TGCAGACATAGAGTCCCATACGAAATCGTAACAGACAACGGATCCCGGTTCATCTCTACTCGATTTGAA	5865843	1.52834e-30	LFQT01002500.1_Scaffold03740	1119	1.83879e-25		0	999		0	999		0	0	999	CM004494.1_chromosome_B4	16645126	1.70251e-27
5836034	2		82.6273	0.755583	-0.121718	228	0.0314403		TGCAGCTAACAAAGCTTACTTCAAACCAAGAGGTGGAGGAGACAAGTCAGTTATTGGAATTCATGAGTG	5836034	1.52834e-30	LFQT01003542.1_Scaffold01108	73	8.67698e-14		0	999		0	999		0	0	999	LFLV01001379.1scaffold_1738.1	4070	4.83514e-13
5857832|F|0--52:G>C	2		82.6273	0.756127	-0.121405	228	0.0312959		TGCAGCTACTGCCTCACGTGTATTGCAGGTATACATTCTTACATGAACTAAAGCATTTAC	5857832	1.3077e-25	LFQT01008267.1_Scaffold00221	91319	2.44758e-23		0	999		0	999		0	0	999	LFLV01000497.1scaffold_434.1	40585	1.06037e-23
5858113|F|0--34:C>A	2		82.6273	0.756127	-0.121405	228	0.0312959		TGCAGGATGATCTTCAGTGAGAGACTGCTTTATCCTGTCCATTGACCTTGGTTAC	5858113	6.88654e-23	LFQT01007842.1_Scaffold00109	213127	5.87442e-19		0	999		0	999		0	0	999	CM004494.1_chromosome_B4	18110546	2.55677e-19
5849706|F|0--56:A>G	2		82.6273	0.756127	-0.121405	228	0.0312959		TGCAGAACCCATACATCATTTCTCAGGCAAGCAGAAAAATTGAAACCGCGAATGGTATACAGTTACAAA	5849706	1.52834e-30	LFQT01008016.1_Scaffold00799	11481	8.49476e-29		0	999		0	999		0	0	999	LFLV01002542.1scaffold_764.1	15173	3.6593e-29
5856212|F|0--49:G>T	2		82.6273	0.756127	-0.121405	228	0.0312959		TGCAGCCCTTTTTCTCTTGTAATTCTCCCAGGCTTTGAATCCTTATTTTGGTTTGGTGGGTTTTTACAG	5856212	1.52834e-30	CM007190.1_chromosome_A6	36101384	3.95223e-27		0	999		0	999	chrA05	9086123	1	3.57047e-17	LFLV01002232.1scaffold_159.1	107361	6.12331e-27
5857601|F|0--31:C>G	2		82.6273	0.756127	-0.121405	228	0.0312959		TGCAGCATATTACCAATGTATGTGTTGTTCACTTGTTCTCCATCTTATTGATTGTGTTAC	5857601	1.3077e-25	CM007202.1_chromosome_B8	16725806	2.44758e-23		0	999		0	999		0	0	999	LFLV01000055.1scaffold_603.1	37236	1.06037e-23
5864504|F|0--8:C>T	2		82.6273	0.756127	-0.121405	228	0.0312959		TGCAGAAACGCATTCTTGATGTCGACCCAGGATGTAAGAGATCCTGGTGATAACTGCTTAC	5864504	3.72679e-26	LFQT01004030.1_Scaffold00911	19078	3.2566e-22		0	999		0	999		0	0	999	LFLV01002145.1scaffold_2687.1	732	3.03012e-24
5866149|F|0--9:T>C	2		82.6273	0.756127	-0.121405	228	0.0312959		TGCAGGCTTTTGCATGAATGTAGCAATCTTGCTTCTCAACTCTTTTGCATGTGCCTCATCAAAGAAATT	5866149	1.52834e-30	LFQT01007686.1_Scaffold00888	9181	1.83879e-25		0	999		0	999		0	0	999	CM004494.1_chromosome_B4	18773498	3.6593e-29
5866080|F|0--16:G>T	2		82.6273	0.757605	-0.120557	228	0.0309054		TGCAGTCTCCGGAACAGAGCGCTGGTAAGTTTGCCGGAAAGTTTCGGAGGATCCTCAATAACTGCAAGC	5866080	1.52834e-30	LFQT01004871.1_Scaffold00301	28658	1.83879e-25		0	999		0	999		0	0	999	LFLV01000940.1scaffold_903.1	26653	7.921e-26
5836323	2		82.6273	0.758189	-0.120222	228	0.0307518		TGCAGGCGCAAGTATCTGCGGTAACCAAACGAACATTACTACAATCTTGTGTAGCGGAAATTGTCTGTG	5836323	1.52834e-30		0	999		0	999		0	999		0	0	999	LFLV01001872.1scaffold_706.1	8165	3.6593e-29
5836954	2		82.6273	0.762183	-0.117941	228	0.0297129		TGCAGAAACTCCTCTATACTCGGAATACCCAAACTACACCAAAGTTGCAGCAATTATGGGTCTCTACCG	5836954	1.52834e-30	LFQT01006123.1_Scaffold00486	33456	8.49476e-29	C1	26196173	2.09502e-17	NC_027748.1_chromosome_C1	26196173	2.09645e-17	chrA03	29686610	3	3.5453e-22	LFLV01000257.1scaffold_497.1	150531	3.6593e-29
5836288	2		82.6273	0.763678	-0.11709	228	0.0293289		TGCAGGATGGCCTAAAGAGGAGGCATCTGAATCCTTTGCAGTTGTAGGCCTTCCGTATATATGTGAGTA	5836288	1.52834e-30	CM007196.1_chromosome_B2	44154744	8.55507e-24		0	999		0	999		0	0	999	LFLV01000474.1scaffold_295.1	178286	3.6593e-29
5848053	2		82.6273	0.769337	-0.113884	228	0.0279004		TGCAGATGCTAAAGTTACAGAGATGATTGAGAAGTTAC	5848053	1.07441e-13		0	999		0	999		0	999		0	0	999	LFLV01001260.1scaffold_1007.1	14668	7.49863e-12
5857328|F|0--7:G>A	2		82.6273	0.77061	-0.113165	228	0.0275842		TGCAGATGTGTCTTTTTTTTGTAACGGGAATTTTTTTTTCAACCACGGCAGGTATTAC		999		0	999		0	999		0	999		0	0	999		0	999
5857977	2		82.6273	0.783697	-0.105852	228	0.024448		TGCAGCTTGAGCAAAGCTGAAGTTGAATGCAATATTTTAC	5857977	8.57861e-15		0	999		0	999		0	999		0	0	999	CM004498.1_chromosome_B8	5598512	6.5697e-13
5846588	2		82.6273	0.787387	-0.103812	228	0.0236006		TGCAGCTTCATAGAGAAATTTATCGAGGAAGGCGGTTATAATCTCGTCCCAACAGGTTAC	5846588	1.3077e-25	LFQT01007842.1_Scaffold00109	48971	2.44758e-23		0	999		0	999		0	0	999		0	999
5858778|F|0--31:T>C	2		82.6273	0.796913	-0.0985892	228	0.0214866		TGCAGTTGAAATGGCTGACATTTTTTCTGTCTGTCTCTCCAACATTAC	5858778	4.28913e-19	CM007193.1_chromosome_A9	12458158	3.65879e-15		0	999		0	999		0	0	999	CM004496.1_chromosome_B6	9618086	1.54106e-15
5843559	2		82.6273	0.798517	-0.0977158	228	0.021141		TGCAGCTGCCATCCCGCCACATCACGGACTTAC	5843559	4.76465e-11	LFQT01004509.1_Scaffold00123	197762	2.56916e-08		0	999		0	999		0	0	999	LFLV01002313.1scaffold_719.1	84137	1.08211e-08
5837264	2		82.6273	0.807227	-0.0930043	228	0.0193165		TGCAGCATAAGACATTACTTATTTATCAATGTGGAGAACACAATCTTGATTTATTGTTTTCATCGACAT	5837264	1.52834e-30	LFQT01005339.1_Scaffold00049	399593	1.83879e-25		0	999		0	999		0	0	999	LFLV01000414.1scaffold_422.1	105333	7.921e-26
5858444	2		82.6273	0.813719	-0.0895255	228	0.0180133		TGCAGTAGTCTTGTTTGCTGGTAAATCAGTAGATACGACAGGCGCAATGTTAC	5858444	8.39926e-22		0	999		0	999		0	999		0	0	999	LFLV01000497.1scaffold_434.1	80666	6.65015e-20
5846148	2		82.6273	0.815955	-0.0883338	228	0.0175755		TGCAGTGATTCCAACATCGGCGGGGTTTGTGTTCTGAGGCATTCCTTTAC	5846148	3.55254e-20		0	999		0	999		0	999		0	0	999	LFLV01001752.1scaffold_975.1	53892	2.77394e-18
5858282|F|0--24:G>A	2		82.6273	0.817367	-0.087583	228	0.0173021		TGCAGGTATCTTCCTTTGGATTTTGGATTTTAC	5858282	4.76465e-11		0	999		0	999		0	999		0	0	999	LFLV01001741.1scaffold_753.1	33504	3.00867e-09
19819010	2		82.6273	0.817382	-0.0875749	228	0.0172991		TGCAGCAGAAGGATGTGGTTGGCAGGACAGGAGAGGCATTCAGGGTTTCGGAGTTTAC	19819010	1.60704e-24	LFQT01004168.1_Scaffold02175	2179	3.00641e-17		0	999		0	999		0	0	999	LFLV01000817.1scaffold_271.1	80327	2.8042e-19
5865795|F|0--31:A>C	2		82.6273	0.819985	-0.086194	228	0.0168009		TGCAGCATTTGGACCCGGAGCGCGAGATGCCAACACCCAACCTTGGATCTCTCTTTGCCCAGCACCTGG	5865795	1.52834e-30	CM007202.1_chromosome_B8	1346182	3.95223e-27		0	999		0	999		0	0	999	LFLV01000626.1scaffold_923.1	59282	3.68528e-24
5862371	2		82.6273	0.822757	-0.0847287	228	0.0162788		TGCAGTTTCTCATAGTTCTCTTTGCTTTCAGTCTCTGAAGTTGAAAGCTTTAC	5862371	8.39926e-22	LFQT01001957.1_Scaffold01913	3108	1.52442e-19		0	999		0	999	chrA07	23252035	1	1.36746e-14	CM004495.1_chromosome_B5	14960122	4.00236e-17
5863837|F|0--51:A>G	2		82.6273	0.827662	-0.0821468	228	0.0153759		TGCAGCAATCAGATCGAGCAATGCACTCTCGATGTCAAAGTAACTATGCGAATATGATTAC	5863837	3.72679e-26	CM007195.1_chromosome_B1	2048318	3.2566e-22		0	999		0	999		0	0	999		0	999
5839671	2		82.6273	0.829407	-0.0812322	228	0.0150612		TGCAGCTGAAGAAATCAAAAGCCTGTCGGTTCAAGTTTCTTACACGATGGGAACTTCGTGACTTTAGTT	5839671	1.52834e-30	LFQT01001397.1_Scaffold02198	6664	1.83879e-25		0	999		0	999		0	0	999	CM004495.1_chromosome_B5	1890390	7.921e-26
5851279|F|0--20:T>C	2		82.6273	0.841692	-0.0748468	228	0.0129419		TGCAGATCGGGAAAACCTTCTCGTTCTAAACACTGGTCAGGGTGCTTTGCTTGACAAAACCAGTATTAC	5851279	1.52834e-30	LFQT01003412.1_Scaffold00229	103416	3.95223e-27		0	999		0	999		0	0	999	LFLV01000474.1scaffold_295.1	16182	1.70251e-27
5854720	2		82.6273	0.850545	-0.0703025	228	0.0115179		TGCAGTCAACTCAACTACCTATTGCAATCACCCCCTCTCTCTCTCTCTTTATCTCTCCGAATCTTTACA	5854720	1.52834e-30	LFQT01007121.1_Scaffold00107	157405	6.66043e-20		0	999		0	999		0	0	999	LFLV01001491.1scaffold_1396.1	26016	2.86912e-20
5851529|F|0--22:C>G	2		82.6273	0.854447	-0.0683147	228	0.0109176		TGCAGATTCTCCCATTGGGCTCCGAAGACGCTCGCATAGCTGTCCAGGAAAACCAACAACGGTAGAAAA	5851529	1.52834e-30	LFQT01005339.1_Scaffold00049	293162	1.83879e-25	C8	38753694	9.74717e-16	NC_027755.1_chromosome_C8	38753694	9.75382e-16	chrA09	31989568	2	1.28417e-16	LFLV01001789.1scaffold_171.1	5026	1.70251e-27
5848069	2		82.6273	0.857168	-0.066934	228	0.0105088		TGCAGCTTATAAAGTTTACAGACAAAGACTTTGAACCCACAGCTTATGAAGTCTTTAC	5848069	1.60704e-24	CM007197.1_chromosome_B3	57350709	4.99532e-20		0	999		0	999		0	0	999	LFLV01002232.1scaffold_159.1	186324	2.8042e-19
5865410|F|0--21:T>C	2		82.6273	0.863342	-0.0638172	228	0.00961112		TGCAGTGATCCAAAACTGTTCTATTGCTACGAATTATAGTTGCTTTTTCGTTGCTTTTAC	5865410	1.3077e-25		0	999		0	999		0	999		0	0	999		0	999
5853277	2		82.6273	0.876527	-0.0572345	228	0.00783156		TGCAGCTTTCTATAAATACCCAACCACCCTCCTTCATTTTCACTCATTAGTTCCAAACCAAAAGAAAGT	5853277	1.52834e-30	LFQT01009653.1_Scaffold00379	18219	8.49476e-29		0	999		0	999		0	0	999	CM004496.1_chromosome_B6	466800	3.6593e-29
5845911	2		82.6273	0.876848	-0.0570756	228	0.00779059		TGCAGGCCGAATGCACCCTCGCGTCCTTATTAC	5845911	4.76465e-11		0	999		0	999		0	999		0	0	999		0	999
5863543	2		82.6273	0.88366	-0.0537148	228	0.00694653		TGCAGTCTCTATAAATCTCAAAGGATTCAGAGGAAGATGGACCGAGACAAAGTGGATCATCTGTAAAGA	5863543	1.52834e-30	LFQT01007148.1_Scaffold00090	252508	1.83879e-25		0	999		0	999		0	0	999	CM004494.1_chromosome_B4	18269908	3.6593e-29
5858733|F|0--27:A>G	2		82.6273	0.891729	-0.049767	228	0.00601053		TGCAGTTCAAGCACTCAAGACTACTCTACATCAGAACTTTAC	5858733	7.29484e-16		0	999		0	999		0	999		0	0	999		0	999
5856484	2		82.6273	0.894483	-0.0484279	228	0.0057069		TGCAGGCGAACTGATATGGTGGTAAAGGTAAACGATGTAAAAGAAAAGCAAAGACATGTAATAATTACA	5856484	1.52834e-30		0	999		0	999		0	999		0	0	999		0	999
5853228|F|0--40:A>G	2		82.6273	0.897446	-0.0469919	228	0.00538916		TGCAGCTTGACATACACGTAGTCCCCCAACTCAAAGCTACAGTCGGTTCTGTGTTGATCTGCAAATTCC	5853228	1.52834e-30	CM007190.1_chromosome_A6	35988426	8.49476e-29		0	999		0	999		0	0	999	LFLV01002232.1scaffold_159.1	221626	1.70251e-27
5858734	2		82.6273	0.90581	-0.0429629	228	0.00454194		TGCAGTTCAAGCACTCAAGACTACTCTGCACCAGAACTTTAC	5858734	7.29484e-16	LFQT01004833.1_Scaffold00033	82051	1.2767e-13		0	999		0	999		0	0	999	CM004496.1_chromosome_B6	9316446	5.67618e-14
5865701|F|0--40:T>C	2		82.6273	0.910298	-0.0408165	228	0.00411763		TGCAGTAGTTGTCAAATTTTTCAAAAGCATCATTTTCCTTTATTTTGGAGTGCCTCGAGTAGTAATAAG	5865701	1.52834e-30	CM007202.1_chromosome_B8	1342439	3.95223e-27		0	999		0	999		0	0	999	CM004498.1_chromosome_B8	9807968	3.6593e-29
5853012|F|0--56:C>G	2		82.6273	0.913275	-0.0393984	228	0.00384778		TGCAGCTGAATAAACTCCCCTGTAAACAAAGAATAGTCCAATCAAGAGAGGTCTAGCTAGCATCTCACT	5853012	1.52834e-30	LFQT01002891.1_Scaffold00102	49420	8.49476e-29		0	999		0	999		0	0	999	CM004494.1_chromosome_B4	17232857	3.6593e-29
5865389	2		82.6273	0.927092	-0.0328771	228	0.00271621		TGCAGAAAGTAACCTAAATAACAATTTTCTGGTAGTCTAGTAAACCAAAAAAAAATATTTGAGACGGAG	5865389	1.52834e-30		0	999		0	999		0	999		0	0	999		0	999
5831538	2		82.6273	0.928005	-0.0324497	228	0.00264842		TGCAGATTGTTATCGGCTTATATGACTTGTCTTGGCACGAATCGAGCTACTTTGATGATGGACTTTTAC	5831538	1.52834e-30	LFQT01001486.1_Scaffold05285	1291	2.37863e-24	C7	16000130	9.74717e-16	NC_027754.1_chromosome_C7	16000130	9.75382e-16		0	0	999	CM004491.1_chromosome_B1	8549252	4.80106e-18
5865678|F|0--12:C>T	2		82.6273	0.92898	-0.0319938	228	0.00257701		TGCAGAGAATCGCTTCCACAATCAGACAATACCCACCATCACTCTCCACATTGTCTTAC	5865678	4.58575e-25	CM007202.1_chromosome_B8	16667685	3.97864e-21		0	999		0	999		0	0	999	LFLV01000199.1scaffold_10.1	2740398	1.72509e-21
5861527	2		82.6273	0.93122	-0.0309477	228	0.00241659		TGCAGTGGCAGTTACATCTGGAGAGGAGAATGACGGTGAGGATGATGTCCCTGGGGATAAGGGTTCGGA	5861527	1.52834e-30	LFQT01005299.1_Scaffold00348	12035	1.83879e-25	C4	35675840	9.61023e-26	NC_027751.1_chromosome_C4	35675840	9.61678e-26	chrC04	32199443	6	7.62012e-24	CM004494.1_chromosome_B4	16686042	3.6593e-29
5864370	2		82.6273	0.931341	-0.0308914	228	0.0024081		TGCAGGTTCCTATAATTCAACGCAAAGTTCGCCTACTCTTGCAAATGACAGTTGCTCTGTAACCAACAT	5864370	1.52834e-30	CM007197.1_chromosome_B3	66210400	8.55507e-24		0	999		0	999	chrCnn_random	11166728	1	7.72871e-14	LFLV01002077.1scaffold_1026.1	22665	3.6593e-29
5844628	2		82.6273	0.937809	-0.0278858	228	0.00197488		TGCAGTCGCCGAACATCCCATCAATCAGCGACACAAACTGCATTAC	5844628	5.15204e-18	LFQT01007561.1_Scaffold00619	56784	9.32507e-16	C8	11214995	2.88832e-08	NC_027755.1_chromosome_C8	11214995	2.89029e-08	chrC05	19915949	5	5.03435e-08	LFLV01002405.1scaffold_1226.1	30740	4.10623e-16
5834268	2		82.6273	0.94284	-0.0255621	228	0.00166775		TGCAGTCCGCCCGCGACTCTAAAAATACAAAGTGCCCGTCGATTGGCCCCGCGGACAAACCCAAAATGT	5834268	1.52834e-30	LFQT01007657.1_Scaffold00834	30444	8.49476e-29		0	999		0	999		0	0	999	CM004494.1_chromosome_B4	84657	4.73361e-28
5857629	2		82.6273	0.943668	-0.0251807	228	0.00161968		TGCAGCATTCTCTCTGCCAGGTTTGTATACAATGTCAAAGTCATACCCCAGTATCTTAC	5857629	4.58575e-25		0	999		0	999		0	999		0	0	999	LFLV01001384.1scaffold_819.1	60228	3.70783e-23
5848080	2		82.6273	0.952226	-0.02126	228	0.00116439		TGCAGGTTGTGTTTTCATGGGTTCACTAGCCTTTAC	5848080	1.24354e-12	LFQT01002891.1_Scaffold00102	156333	1.84238e-10		0	999		0	999		0	0	999	CM004494.1_chromosome_B4	17179964	8.40674e-11
5863004|F|0--50:A>G	2		82.6273	0.956964	-0.0191046	228	0.00094469		TGCAGATCATCAGAAAGGCATCGATCGACCTGCTGTCGCAAGTATCGATCAATGCGCCTCTAGTAAGCT	5863004	1.52834e-30	LFQT01007686.1_Scaffold00888	10555	3.0988e-18		0	999		0	999		0	0	999	LFLV01000795.1scaffold_2105.1	8662	3.6593e-29
5858931	2		82.6273	0.957548	-0.0188393	228	0.000919176		TGCAGATTTCCGTCGTCGAGGATGAGAGCAATGTGGCTCCGAATTTTAGATATGTTAC	5858931	1.60704e-24	CM007197.1_chromosome_B3	76546409	6.46186e-19		0	999		0	999		0	0	999	LFLV01000875.1scaffold_57.1	695201	2.8042e-19
5844227	2		82.6273	0.960211	-0.0176333	228	0.000807385		TGCAGGTGATACTAGGGTTCTAAAGGACCTTCTTAC	5844227	1.24354e-12	LFQT01001787.1_Scaffold00572	1178	8.57178e-09		0	999		0	999		0	0	999	LFLV01000504.1scaffold_6844.1	16	5.05956e-08
5840142	2		82.6273	0.963238	-0.0162665	228	0.000689136		TGCAGATCACTCATTCAATGATTCTTATCTCTTTTACATGCGGTGGATCTCCACCTATATAAAGTTCAT	5840142	1.52834e-30	CM007187.1_chromosome_A3	7089217	5.11253e-26	C4	33940174	5.7431e-28	NC_027751.1_chromosome_C4	33940174	5.74701e-28	chrA07	11171938	1	4.5538e-26	CM004494.1_chromosome_B4	16272578	4.73361e-28
5864571	2		82.6273	0.969935	-0.0132573	228	0.000460804		TGCAGCCAAGCCATGTGCGCCGAGTTCCGGCTCCTCGGCTGTCGACCGTTTAC	5864571	8.39926e-22	LFQT01007644.1_Scaffold00520	55843	3.29979e-16		0	999		0	999		0	0	999	CM004494.1_chromosome_B4	9517678	3.09402e-18
5845925	2		82.6273	0.971733	-0.0124532	228	0.000407329		TGCAGGCTCTTGTGGTCCTGCGCGGGGCTTTGCTCTTGGCCTTCACCGTTCAGGTTTTAC	5845925	1.3077e-25	LFQT01007657.1_Scaffold00834	33307	1.47306e-20	C9	26404437	7.79774e-16	NC_027756.1_chromosome_C9	26404437	7.80306e-16	chrC07_random	52866	2	1.32139e-15	CM004494.1_chromosome_B4	87521	4.93342e-22
5856854|F|0--42:C>T	2		82.6273	0.97361	-0.0116148	228	0.00035499		TGCAGAATTGGTAAATGGCTCTCAGCGGACTTCTATCTCGAACAGATGCACCATTAC	5856854	5.62783e-24	LFQT01006624.1_Scaffold04416	2750	1.04114e-21		0	999		0	999		0	0	999	CM004497.1_chromosome_B7	7668825	2.10402e-20
5866064|F|0--12:T>C	2		82.6273	0.979266	-0.00909915	228	0.0002191		TGCAGTCAGCATTATGGCTATAGACACTGCTGAATTATTAGGATTAC	5866064	1.48755e-18	LFQT01008157.1_Scaffold00485	64648	1.26111e-14		0	999		0	999		0	0	999	LFLV01002452.1scaffold_845.1	50449	1.19132e-16
5866066|F|0--22:A>G	2		82.6273	0.979266	-0.00909915	228	0.0002191		TGCAGTCAGCATTATGGCTATAAACACTGCTGAAGTATTAGGATTAC	5866066	1.48755e-18	LFQT01006766.1_Scaffold00256	60599	2.71057e-16		0	999		0	999		0	0	999	CM004494.1_chromosome_B4	18195319	1.19132e-16
5835970	2		82.6273	0.988556	-0.00499883	228	6.67e-05		TGCAGCCTGATAATCGAGTTGACGTTGGAACTTCTCAGCCCCCTGCTGCATAGTATCCATGCGTAGTGC	5835970	1.52834e-30	LFQT01004440.1_Scaffold00445	76222	3.95223e-27		0	999		0	999		0	0	999	LFLV01001409.1scaffold_491.1	99762	1.70251e-27
5858444|F|0--14:T>G	2		82.6273	0.989617	-0.00453304	228	5.49e-05		TGCAGTAGTCTTGTTTGCTGGTAAATCAGTAGATACGACAGGCGCAATGTTAC	5858444	8.39926e-22		0	999		0	999		0	999		0	0	999	LFLV01000497.1scaffold_434.1	80666	6.65015e-20
5849372	2		82.6273	0.994583	-0.00235919	228	1.5e-05		TGCAGGTTTCTAATTGAGGCTAAACTTATTTCTAATTGACAATTTCTAATATTGTTCAATCATTTACAG	5849372	1.52834e-30		0	999		0	999		0	999		0	0	999	LFLV01002023.1scaffold_775.1	78132	1.70251e-27
5839669	2		82.6273	0.997453	-0.00110776	228	3.31e-06		TGCAGCTCTCGAGGTTATGTTACCATTCCAAAGGAACCTTGAGCACAGTTGTTCTATCATCTTAC	5839669	2.44442e-28	CM007202.1_chromosome_B8	15729241	4.64776e-26		0	999		0	999		0	0	999	CM004491.1_chromosome_B1	23018321	2.00657e-26
5864089|F|0--11:T>C	2		82.6273	0.998524	-0.000641655	228	1.11e-06		TGCAGAAGAAATGAACACACAAACACAATTAGAAAGTAAACTGATGAGAAACCAACACATGAACTTTAT	5864089	7.11069e-29	CM007197.1_chromosome_B3	76727819	1.11453e-17		0	999		0	999		0	0	999	CM004493.1_chromosome_B3	595367	3.6593e-29
5835163	2		82.6319	0.78201	-0.106788	228	0.0248409		TGCAGTCCCTCTTTTTTTTGGTTTGAATCTCTGAACAACCTCTTTAGTTTATTGAAATAGTTACAAAGC	5835163	1.52834e-30		0	999		0	999		0	999		0	0	999		0	999
14784793	2		82.964	0.288273	-0.540196	228	0.366726		TGCAGTCAACTCAACTACCTAATGCAATCACCCCCTCTCTCTCTATCTCTCCGAATCTTTAC	14784793	1.06146e-26	LFQT01008150.1_Scaffold00478	63943	5.56133e-25		0	999		0	999		0	0	999	LFLV01000681.1scaffold_1490.1	16882	2.40574e-25
5848058	2		82.964	0.310957	-0.507299	228	0.333784		TGCAGATTTTCCGAGTTTTAGATGTGTTAC	5848058	1.74175e-09		0	999		0	999		0	999		0	0	999		0	999
5846592	2		82.964	0.594936	-0.225529	228	0.0917642		TGCAGCTTGAGCAAAGCTGTTGAATGCAATATTTTAC	5846592	3.6609e-13		0	999		0	999		0	999		0	0	999		0	999
5861814	2		82.964	0.676063	-0.170013	228	0.0566586		TGCAGACACGGAGTCCCTTACGAAATTGTAAAGGACAACGGGTTTCAATTCATTTCAACCAGATTCGAA	5861814	1.52834e-30	CM007199.1_chromosome_B5	25739041	1.85185e-20		0	999		0	999		0	0	999	LFLV01002041.1scaffold_267.1	45139	3.71145e-19
5842575	2		82.964	0.702862	-0.15313	228	0.0472185		TGCAGATGCAAGATATTTTTGATGAAATAGATGCAGACAGTTCATTAC	5842575	4.28913e-19	LFQT01003922.1_Scaffold00110	28869	2.82842e-16		0	999		0	999		0	0	999		0	999
5834760	2		82.964	0.721921	-0.14151	228	0.0410992		TGCAGTTCATAATCGAGAATCAATAAGAAAAATCTGTCTTGCAGTAGAAACATTCAAAATTTAC	5834760	8.59634e-28	CM007196.1_chromosome_B2	38915745	1.62984e-25		0	999		0	999		0	0	999		0	999
19819034	2		82.964	0.725382	-0.139433	228	0.0400393		TGCAGAGACTACACTCAAGAGTACACACTAAAGCTTGCTCCAACTGAGTTTAC	19819034	8.39926e-22	LFQT01000203.1_Scaffold00912	29906	9.17465e-17		0	999		0	999		0	0	999		0	999
5837543	2		82.9658	0.0269191	-1.56994	228	1.6056		TGCAGGTTTTGTAGGTGTTGCAGCTGTAGTGATCGAAGCCATGATTTCAAACTTCAGGACTGGCCATGC	5837543	1.52834e-30	LFQT01007612.1_Scaffold04114	935	3.95223e-27		0	999		0	999		0	0	999	LFLV01002027.1scaffold_12.1	1092589	1.70251e-27
5860565|F|0--5:T>C	2		82.9658	0.296113	-0.528542	228	0.354973		TGCAGTTCATCGCATTCTTCGCTATATCAAGAACAATCCATGTCAAGGTTTGTTCTATTCTGCGAACTC	5860565	1.52834e-30	LFQT01004833.1_Scaffold00033	82411	8.55507e-24		0	999		0	999		0	0	999	CM004496.1_chromosome_B6	9316806	3.68528e-24
5856028	2		82.9732	0.575664	-0.239831	228	0.101703		TGCAGGGGAGAGAGAGATAAGCTTATTCTTCCGTTGATGAGTCTCGTTCTGCGGAAGTTTTACTCTTCC	5856028	1.52834e-30	CM007198.1_chromosome_B4	14059071	8.49476e-29		0	999		0	999		0	0	999	CM004498.1_chromosome_B8	5262485	1.70251e-27
5865227	2		83.3007	0.90239	-0.0446056	228	0.00487945		TGCAGTTTGGTCAAGAACCTCCGAAAATGTCTTCACGTCGGTAATCATGGCCATAAATGCACCTTGGTG	5865227	5.4969e-30	LFQT01003675.1_Scaffold00210	53044	1.83879e-25		0	999		0	999		0	0	999	CM004491.1_chromosome_B1	3310329	7.921e-26
5843306	2		83.6397	0.270229	-0.568268	228	0.395393		TGCAGCGACAGTTATGTAAATGTTAC		999		0	999		0	999		0	999		0	0	999		0	999
14792614	2		83.6397	0.78969	-0.102544	228	0.0230799		TGCAGCTCCAGCTTGTCTTGTATGTCACAGTTAC	14792614	1.41938e-11	LFQT01003861.1_Scaffold00080	35110	9.24025e-08		0	999		0	999		0	0	999	CM004494.1_chromosome_B4	16593147	9.20176e-10
19819026	2		84.3153	0.649458	-0.187449	228	0.0670456		TGCAGTCAACTAATCTAAGAATGGTGCTAGAGAGTGGTTAC	19819026	2.50443e-15	LFQT01009653.1_Scaffold00379	71819	4.33674e-13	C2	30411267	1.82697e-09	NC_027749.1_chromosome_C2	30411267	1.82821e-09	chrCnn_random	33918603	7	3.89018e-08	CM004496.1_chromosome_B6	417593	1.93407e-13
5858478	2		84.3153	0.749392	-0.125291	228	0.0331095		TGCAGTATCTTTTACAATAAAGATGAAATACACATTAC	5858478	1.07441e-13		0	999		0	999		0	999		0	0	999	CM004494.1_chromosome_B4	15904279	7.49863e-12
19819025|F|0--45:A>T	2		84.6475	0.720866	-0.142145	228	0.0414253		TGCAGATGAGAGATATGGTCTTCTGCCTCAAGGGACTTGACCAACATGTCGTCACTATAGACCTCCATG	19819025	1.52834e-30	LFQT01004616.1_Scaffold00296	105819	3.95223e-27		0	999		0	999		0	0	999	LFLV01000417.1scaffold_1134.1	4050	3.6593e-29
5851682	2		84.6475	0.796717	-0.0986959	228	0.021529		TGCAGCAAATCAAGTTAGCAAATCCGGGTTCTATCACTAGTAAAGAACTTGATGCTAAAGATAGATTTA	5851682	7.11069e-29	LFQT01002030.1_Scaffold00434	80895	8.49476e-29	C2	35125597	1.25199e-19	NC_027749.1_chromosome_C2	35125597	1.25284e-19	chrC02	27655433	1	2.13372e-19	LFLV01002471.1scaffold_1262.1	28449	3.71145e-19
14792461	2		84.6475	0.879898	-0.0555677	228	0.00740657		TGCAGTTTGGACAAGAACCTCTGTAAATGTCTTCACGTCGGTAATCATGGCCATATAAGCACCTTGGAG	14792461	7.11069e-29	LFQT01003142.1_Scaffold00038	531837	5.14883e-21		0	999		0	999		0	0	999	LFLV01001183.1scaffold_168.1	503276	2.21797e-21
5845737	2		84.652	0.494143	-0.306147	228	0.151809		TGCAGCGGCATGCGGTGACTGTTCTTCTTAC	5845737	5.28297e-10	LFQT01004030.1_Scaffold00911	22776	2.65873e-07		0	999		0	999		0	0	999	LFLV01000606.1scaffold_1258.1	12597	3.50279e-08
5849504	2		84.652	0.568899	-0.244965	228	0.105351		TGCAGAAACATATCAAGACACAGCTACTGAGACATCACCGTCATCATCTTCTATAGTTTCAGTTACAGA	5849504	1.52834e-30		0	999		0	999		0	999		0	0	999	LFLV01000497.1scaffold_434.1	80711	6.12331e-27
5866066	2		84.652	0.665193	-0.177053	228	0.060777		TGCAGTCAGCATTATGGCTATAAACACTGCTGAAGTATTAGGATTAC	5866066	1.48755e-18	LFQT01006766.1_Scaffold00256	60599	2.71057e-16		0	999		0	999		0	0	999	CM004494.1_chromosome_B4	18195319	1.19132e-16
5849504|F|0--11:A>C	2		84.652	0.670206	-0.173792	228	0.0588565		TGCAGAAACATATCAAGACACAGCTACTGAGACATCACCGTCATCATCTTCTATAGTTTCAGTTACAGA	5849504	1.52834e-30		0	999		0	999		0	999		0	0	999	LFLV01000497.1scaffold_434.1	80711	6.12331e-27
5865400|F|0--8:T>G	2		84.652	0.797411	-0.0983177	228	0.0213789		TGCAGACCTCTTTTCCTCTAGGAAGGATCGAACAATTCTTTAC	5865400	2.12043e-16	LFQT01000642.1_Scaffold01184	15202	1.74327e-12		0	999		0	999		0	0	999		0	999
5853683	2		84.652	0.835596	-0.0780037	228	0.0139726		TGCAGGATTCAAAATGGATGAACTTGATTTCCCACCGAGGCAATATACTATAGGGCAGGAGCCAGTGCC	5853683	1.52834e-30		0	999		0	999		0	999		0	0	999	CM004494.1_chromosome_B4	16683900	3.6593e-29
5853682|F|0--23:A>T	2		84.652	0.851575	-0.0697774	228	0.011358		TGCAGGATTCAAAATGGATGAACATGATTTCCCACCGAGGCAATATACTGTAGGGCAGGAGCCAGTGCC	5853682	1.52834e-30	LFQT01005299.1_Scaffold00348	9689	8.49476e-29		0	999		0	999		0	0	999		0	999
5842970	2		84.652	0.967619	-0.0142956	228	0.000534582		TGCAGCAGATGTATCTGATCCTCCCTCCTGAAACTCTAGAGAGGGTTATCCTTAC	5842970	6.88654e-23	LFQT01007686.1_Scaffold00888	14110	5.87442e-19		0	999		0	999		0	0	999	CM004494.1_chromosome_B4	13124450	5.49543e-21
5864598	2		84.9887	0.297386	-0.52668	228	0.353103		TGCAGCTCATCTCAGCTAATGGAAAGCTTGCATCTTCCAAATGTAAGAATACATTAC	5864598	5.62783e-24	LFQT01006140.1_Scaffold00303	66878	4.84395e-20	C6	30246758	1.18767e-18	NC_027753.1_chromosome_C6	9575662	1.18848e-18	chrCnn_random	37631013	3	2.00738e-18	LFLV01002232.1scaffold_159.1	518577	2.10402e-20
5865410|F|0--30:G>A	2		84.9887	0.492114	-0.307935	228	0.153243		TGCAGTGATCCAAAACTGTTCTATTGCTACGAATTATAGTTGCTTTTTCGTTGCTTTTAC	5865410	1.3077e-25		0	999		0	999		0	999		0	0	999		0	999
19819015	2		84.9887	0.699694	-0.155092	228	0.0482829		TGCAGTGATCCAAAACTGTTCCATTGCTACAAATTATAGTTGCTTTTCCGTTGCCATTAC	19819015	1.3077e-25	LFQT01005494.1_Scaffold00803	30617	1.13875e-21		0	999		0	999		0	0	999	LFLV01001491.1scaffold_1396.1	26560	4.93342e-22
5862873|F|0--59:T>C	2		85.2128	0.360634	-0.442934	228	0.271595		TGCAGACATCTCAGTTTTTAGTGGGAAACAGAAGATTCTCGGTCTCTATGTTACTAGGCTTGGACACGG	5862873	1.52834e-30	CM007202.1_chromosome_B8	16764292	8.55507e-24		0	999		0	999		0	0	999	LFLV01000055.1scaffold_603.1	79653	1.70251e-27
5832372	2		85.3277	0.189871	-0.721542	228	0.559641		TGCAGCGAGTAGAACAGCTTCCTGCTAAGCTTGGATGGTCTGCTGCATCTTTTGTTGCATCAGTGCCAT	5832372	1.52834e-30	LFQT01007148.1_Scaffold00090	53750	8.49476e-29		0	999		0	999	chrCnn_random	17253503	1	1.00687e-07	CM004494.1_chromosome_B4	18455000	3.6593e-29
5842647	2		85.3277	0.827391	-0.0822895	228	0.0154252		TGCAGATTATCGACACTGAATGATTAC		999		0	999		0	999		0	999		0	0	999		0	999
5865912	2		85.6667	0.304809	-0.515973	228	0.342399		TGCAGCAACTTTGGACCGTCTATCCCGTCAGGTAATCTCATAATCACTGGTTCATTGTGTTTAC	5865912	8.59634e-28		0	999		0	999		0	999		0	0	999	CM004496.1_chromosome_B6	1449316	1.52408e-22
5835932	2		85.6667	0.482134	-0.316832	228	0.160437		TGCAGCCAGATTCAGAAGGGGATAGGCTGTCCAGGATGATTCATTCATCCGCAAGTCTGACATTGAGGC	5835932	1.52834e-30		0	999		0	999		0	999		0	0	999	CM004494.1_chromosome_B4	18684512	3.6593e-29
5836666	2		85.6667	0.945935	-0.0241386	228	0.00149174		TGCAGTCTCGTCATTTCATTTGGGGGTATCACAAGTGGCGACAATGGAGCAAGGCCAAGCTGGGTAATT	5836666	1.52834e-30		0	999		0	999		0	999		0	0	999	LFLV01001752.1scaffold_975.1	48540	3.6593e-29
5860787|F|0--11:G>A	2		87.0135	0.703682	-0.152623	228	0.0469451		TGCAGGAAACAGGTACAAAGACTGTCTTCAACACTGGTTTGCTGCGGCAGCACAACAGTTCTTGATTAT	5860787	1.52834e-30	LFQT01004833.1_Scaffold00033	58373	5.11253e-26		0	999		0	999		0	0	999	CM004496.1_chromosome_B6	9282810	2.20233e-26
5836402	2		87.3502	0.62384	-0.204927	228	0.0780611		TGCAGGTACGATCTGCAAGTAAACGCACCGAAAAAAAGCAAGATCAGTGCCTGAACAGAGAGGAAACAT	5836402	1.52834e-30		0	999		0	999		0	999		0	0	999	LFLV01002390.1scaffold_1332.1	16970	3.6593e-29
5830979	2		87.3502	0.646492	-0.189437	228	0.0682687		TGCAGAGGGCGGAGATTGCAGAGAGAGTGACATGTTCTTTTTTTACGCTTCCCTTCGATCTGAGCGTAA	5830979	1.52834e-30	CM007200.1_chromosome_B6	6686544	8.55507e-24		0	999		0	999		0	0	999	CM004498.1_chromosome_B8	5600325	3.6593e-29
5865963|F|0--13:C>T	2		87.3502	0.686237	-0.163526	228	0.0529569		TGCAGACTCTTTACCTCAGCCTTCTTGGCGGCATCCCTCAGAATATGTTCTTCAGCTGTGGCCACAACA	5865963	1.52834e-30	LFQT01002356.1_Scaffold00683	47916	3.95223e-27	C7	35604032	9.81637e-11	NC_027754.1_chromosome_C7	35604032	9.82307e-11		0	0	999	LFLV01000525.1scaffold_597.1	26303	7.921e-26
5865964|F|0--23:C>A	2		87.3502	0.78509	-0.105081	228	0.0241264		TGCAGACTCTTTATCTCAGCCTTCTTGGAAGCATCCCTCAGAATATGTGCCTCAGCTGTGGCCACAACA	5865964	1.52834e-30		0	999		0	999		0	999		0	0	999		0	999
5849387|F|0--26:C>G	2		87.3502	0.803069	-0.0952474	228	0.0201767		TGCAGTTGTATGTGCTTATCAATCAGCGGTGCCATATTGATCACATCTCTTAGTGTTTTTGGACTGAAC	5849387	1.52834e-30	CM007188.1_chromosome_A4	3555504	8.49476e-29		0	999		0	999		0	0	999	LFLV01000581.1scaffold_668.1	31966	1.70251e-27
5839649	2		87.3502	0.819169	-0.0866266	228	0.0169563		TGCAGCAGCTACAGCCGCAGAAGCAGCGGTTTCTGTGGCTAAAACGACCGCGGAAATGATTAC	5839649	3.02152e-27	CM007193.1_chromosome_A9	12453246	5.71164e-25		0	999		0	999		0	0	999	CM004496.1_chromosome_B6	9613190	1.14873e-23
5839703	2		87.6869	0.27209	-0.565288	228	0.392327		TGCAGTGACGAAGAGGGGCTTTGGTAAAGGTCTTCGCGGAACTTTGAGTCGACGTGAAGAGTGTTCATT	5839703	1.52834e-30		0	999		0	999		0	999		0	0	999	LFLV01000497.1scaffold_434.1	122636	7.921e-26
5839639	2		87.6869	0.563035	-0.249464	228	0.108583		TGCAGATGATGCTTCTCGGATACGCAGAAGTGCCAGGGCACTCATCCAATCACAAAGACCAGTGCCGTC	5839639	1.52834e-30		0	999		0	999		0	999		0	0	999	LFLV01002232.1scaffold_159.1	92872	6.16678e-22
5865964	2		88.3626	0.555972	-0.254947	228	0.112563		TGCAGACTCTTTATCTCAGCCTTCTTGGAAGCATCCCTCAGAATATGTGCCTCAGCTGTGGCCACAACA	5865964	1.52834e-30		0	999		0	999		0	999		0	0	999		0	999
5836317	2		88.3626	0.812604	-0.0901208	228	0.0182336		TGCAGGCCCTTGATAACTCTCAGATGCTTCACTAAGCTGACTGAAGACATACCATAGGTCTGATCAGAA	5836317	1.52834e-30	LFQT01002788.1_Scaffold06730	489	3.95223e-27		0	999		0	999		0	0	999	CM004498.1_chromosome_B8	15682019	7.921e-26
5863835	2		88.3626	0.833023	-0.079343	228	0.01442		TGCAGTGACTGATTCATCCGTATGGCACGCTCGTCTCGGACATGTTAC	5863835	4.28913e-19	CM007192.1_chromosome_A8	9664025	1.70227e-13		0	999		0	999		0	0	999	LFLV01001741.1scaffold_753.1	55279	3.3123e-17
5854175	2		88.7004	0.593429	-0.226632	228	0.092518		TGCAGGTCTGAGCTCTCTATTATATCATCAAGTTCCTATGTTCAAAGGTAGGAGAATCATTATTGTGGT	5854175	1.52834e-30		0	999		0	999		0	999		0	0	999	LFLV01002232.1scaffold_159.1	363986	7.921e-26
5854176|F|0--36:C>T	2		88.7004	0.71045	-0.148467	228	0.0447244		TGCAGGTCTGAGCTCTCTATTATATCATCAAGTTCCCATGTTCAAGGGTAGGAGAATCATTATTGTGGT	5854176	1.52834e-30		0	999		0	999		0	999		0	0	999	LFLV01002232.1scaffold_159.1	363986	3.6593e-29
5833268	2		88.7004	0.733743	-0.134456	228	0.037543		TGCAGGATCAAGCTCTAGTTACCATGCAAAGAAATTCCTGCCATAAATTTGTGGATAGCCTAAACCAGG	5833268	1.52834e-30	LFQT01007561.1_Scaffold00619	10600	8.49476e-29		0	999		0	999		0	0	999	LFLV01002005.1scaffold_1829.1	5543	4.73361e-28
19819005	2		88.7004	0.734109	-0.134239	228	0.0374356		TGCAGAATAACTCTCGTAAAATAAAAGCTCGACAACTTTTTAC	19819005	2.12043e-16	LFQT01008183.1_Scaffold01120	2430	1.74327e-12		0	999		0	999		0	0	999	LFLV01002155.1scaffold_1770.1	7514	1.66125e-14
5839641	2		88.7004	0.750471	-0.124666	228	0.0328152		TGCAGATTGATACTTGCTGTTGTGTTTGTTGTGAAATTTGATTTTACATGAACCCTAAGATCTTTACAG	5839641	1.52834e-30	CM007202.1_chromosome_B8	15725810	3.95223e-27		0	999		0	999		0	0	999	LFLV01001260.1scaffold_1007.1	2078	1.70251e-27
5863717	2		88.7004	0.890611	-0.0503118	228	0.00613608		TGCAGTGTTCCAAAATACGCCCAACGCAGCCATCTATACAGTCACTTTATGTTGTGCGGCCATCTAACG	5863717	1.52834e-30	LFQT01002891.1_Scaffold00102	199131	3.98029e-22		0	999		0	999		0	0	999	CM004494.1_chromosome_B4	17131979	3.6593e-29
5865360	2		89.0371	0.640896	-0.193212	228	0.0706132		TGCAGCAGCTTCAGCTTCGGGATCAGGGATTGCAGCCCCCTGATCATTGATTCTTTGACCTGCTGCATT	5865360	1.52834e-30	LFQT01007388.1_Scaffold00516	18067	3.95223e-27		0	999		0	999		0	0	999	LFLV01002129.1scaffold_779.1	8815	1.70251e-27
5860125|F|0--9:T>A	2		89.0371	0.857933	-0.0665466	228	0.0103954		TGCAGCACCTGAAGTGGAAGATAATTGACTACCACTGGCTCGTGATGACTTTTGAAAACTCTGATCAGA	5860125	1.52834e-30	CM007190.1_chromosome_A6	36045440	1.83879e-25		0	999		0	999		0	0	999	LFLV01002232.1scaffold_159.1	157844	1.70251e-27
5863048|F|0--11:T>G	2		89.0371	0.996645	-0.00145962	228	5.74e-06		TGCAGATTTCTTCTAGCTCGTTCATCGTCGATGGGAGCGGAGAGATTGGTCGTTGACTCAATCTAGCTC	5863048	1.52834e-30	LFQT01002891.1_Scaffold00102	170871	3.95223e-27		0	999		0	999		0	0	999	CM004494.1_chromosome_B4	17137635	3.6593e-29
19819030	2		89.375	0.319626	-0.495359	228	0.322012		TGCAGGACATTCGCCGAAAACCTAGTCGGAACAGCCCTCGAATGGTTCTCCGGCCTTGAGCCAAATTCG	19819030	1.52834e-30	LFQT01004871.1_Scaffold00301	36561	3.95223e-27		0	999		0	999		0	0	999	LFLV01001368.1scaffold_904.1	71417	1.70251e-27
5861815	2		89.375	0.526608	-0.278512	228	0.130176		TGCAGACACGGAGTCCGTTACGAAATTGTAATGGACAACGGGTCTCAATTCATTTCAACCAGATTCGAA	5861815	1.52834e-30	LFQT01002477.1_Scaffold00275	1851	3.98029e-22		0	999		0	999		0	0	999	CM004493.1_chromosome_B3	18871191	1.71459e-22
5864976	2		89.7105	0.404668	-0.392902	228	0.225611		TGCAGTGATTTTGAATTCGTCCATTATCGGCAAGAGCAGCTGGCGGTGTTAC	5864976	1.3629e-19	CM007195.1_chromosome_B1	1892309	1.14443e-15		0	999		0	999	chrAnn_random	35614262	1	2.20652e-12	CM004498.1_chromosome_B8	11256096	4.99885e-16
5864725	2		89.7105	0.469543	-0.328325	228	0.169872		TGCAGCACAACTATACAGAAATACCATCATTTTCCATTACAAAAATTCTTTAGAATAATCCAATCCTAA	5864725	1.52834e-30	LFQT01002891.1_Scaffold00102	199197	8.49476e-29		0	999		0	999		0	0	999	CM004494.1_chromosome_B4	17138333	4.76721e-23
5864725|F|0--16:A>G	2		89.7105	0.715262	-0.145535	228	0.0431823		TGCAGCACAACTATACAGAAATACCATCATTTTCCATTACAAAAATTCTTTAGAATAATCCAATCCTAA	5864725	1.52834e-30	LFQT01002891.1_Scaffold00102	199197	8.49476e-29		0	999		0	999		0	0	999	CM004494.1_chromosome_B4	17138333	4.76721e-23
5844792	2		90.0495	0.204295	-0.689742	228	0.524601		TGCAGTGGAAAGATTATAAAACTTTCTTTTGAGTTTAC	5844792	1.07441e-13	LFQT01009510.1_Scaffold00252	11398	1.66163e-11		0	999		0	999		0	0	999	CM004497.1_chromosome_B7	7754846	2.69699e-11
5863442	2		90.3839	0.11309	-0.946574	228	0.818941		TGCAGGTCTGAAAAATACAAAAAGAAACACTGGCAAGCGAGTAAAATCATTCGCAAGCTAATGGCAAGC	5863442	1.52834e-30	CM007196.1_chromosome_B2	34554952	2.37863e-24		0	999		0	999		0	0	999	LFLV01001640.1scaffold_3301.1	1109	2.8489e-25
5849886|F|0--29:C>A	2		90.3839	0.157016	-0.804057	228	0.652569		TGCAGAAGCAGAGTACATGGCACTATGTGCAACAGCAAACCAAGCAATATGGCTGAGAAGATTGCTTGA	5849886	1.52834e-30	CM007190.1_chromosome_A6	36038878	8.49476e-29		0	999		0	999		0	0	999	LFLV01002232.1scaffold_159.1	164204	3.6593e-29
5856850|F|0--15:G>A	2		90.3839	0.384275	-0.415358	228	0.245973		TGCAGAATTGGAAATGGCTATCAGCAGACTTCTATCTCGAACAGATGCACCATTAC	5856850	1.96942e-23	LFQT01009510.1_Scaffold00252	102930	3.62758e-21		0	999		0	999		0	0	999	CM004497.1_chromosome_B7	7654806	3.41409e-18
5863005	2		90.3839	0.439574	-0.356968	228	0.194049		TGCAGATCATCAGAAAGGCATCGATCGACCTGCTGTCGCAAGTATAGATCGATGCGCCTCTAGTAAGCT	5863005	1.52834e-30	LFQT01003693.1_Scaffold01055	19794	1.44173e-16		0	999		0	999		0	0	999	LFLV01000795.1scaffold_2105.1	8662	7.921e-26
5864932|F|0--35:G>A	2		90.3839	0.650823	-0.186537	228	0.066487		TGCAGCCCCAAAGATGACCTTGAGTTATCATGTACGAGAGAATATATGGGACAAGTTAC	5864932	2.13354e-23	LFQT01001202.1_Scaffold04907	1679	1.85108e-19		0	999		0	999		0	0	999	CM004491.1_chromosome_B1	18224619	1.72509e-21
5865584	2		90.3839	0.738068	-0.131904	228	0.0362869		TGCAGCTAGCTGAGCAGTGTTAGCCTGTTCTCGATCTTGCGCCATCTTTAC	5865584	1.02066e-20	LFQT01008260.1_Scaffold00489	30020	8.51931e-17		0	999		0	999		0	0	999	CM004494.1_chromosome_B4	14322738	8.00924e-19
5852636	2		90.3839	0.738896	-0.131417	228	0.0360489		TGCAGCGGATGGACTTTCTCGAATGTCATTCTTTGCTTTGACCATACCAACATCTCTACAACTTCAAGA	5852636	1.52834e-30		0	999		0	999		0	999		0	0	999	LFLV01001384.1scaffold_819.1	60162	3.6593e-29
5856851	2		90.3839	0.779802	-0.108016	228	0.0253602		TGCAGAATTGGAAATAGCTATCAGCGGACTTCTATCTCGAACAGATGCACCATTAC	5856851	1.96942e-23	LFQT01009510.1_Scaffold00252	102930	7.85234e-18		0	999		0	999		0	0	999	CM004497.1_chromosome_B7	7654806	1.57722e-21
5866131|F|0--20:C>T	2		90.7206	0.324057	-0.489378	228	0.316155		TGCAGCATCATAGAGAAAATCGTTGACGAAAGCGCTTGCAATGTCATTCCAAGCGGTGAGAGATCCTGG	5866131	1.52834e-30	LFQT01003777.1_Scaffold00609	44015	1.83879e-25		0	999		0	999		0	0	999	LFLV01002035.1scaffold_470.1	106391	7.921e-26
5858699|F|0--9:G>A	2		91.0573	0.598453	-0.22297	228	0.0900213		TGCAGTGTTGGTTTCAAATTATTCGATTAC	5858699	1.74175e-09	LFQT01003305.1_Scaffold00384	26805	2.32639e-07		0	999		0	999		0	0	999		0	999
5859613|F|0--48:G>A	2		91.0573	0.718736	-0.143431	228	0.0420884		TGCAGACTCTTTACCTTAGCCTTCTTAGTAGCATCCCTCAGAATATGTGCTTCAGCTGTGGCCTCAAAA	5859613	1.97704e-29	LFQT01005367.1_Scaffold00703	34785	5.14883e-21		0	999		0	999		0	0	999	LFLV01001818.1scaffold_1817.1	8871	1.71459e-22
5855574|F|0--39:T>C	2		91.394	0.639334	-0.194272	228	0.0712762		TGCAGTTTATCACTATGGATTGCATAAGTGTGATATAAATGCTGAATTCTAAACCTCTGGTTTATGTCT	5855574	1.52834e-30	LFQT01006830.1_Scaffold03143	2936	8.49476e-29		0	999		0	999		0	0	999	CM004494.1_chromosome_B4	12289040	3.6593e-29
5121967|F|0--29:C>T	2		91.7307	0.482928	-0.316117	228	0.159856		TGCAGCGACCGATGGTAACTTTTTTCCATCGATCGACACTTAC		999	CM007196.1_chromosome_B2	11739018	1.74327e-12		0	999		0	999		0	0	999	CM004498.1_chromosome_B8	11665928	7.72906e-13
5865554	2		91.7307	0.618694	-0.208524	228	0.080399		TGCAGCGTTCGTTGGGAAGGAACAGATTAC	5865554	1.74175e-09	LFQT01008353.1_Scaffold00319	101743	2.32639e-07		0	999		0	999		0	0	999	LFLV01002301.1scaffold_1547.1	5802	1.11985e-07
5844943	2		91.7307	0.875441	-0.0577733	228	0.00797115		TGCAGTTATATGTCATGCCCCCTGCATTGTGTAGCTCGTGGCGTTTTTAC	5844943	3.55254e-20	LFQT01004509.1_Scaffold00123	69952	3.8112e-15		0	999		0	999		0	0	999	LFLV01001524.1scaffold_642.1	6623	2.77394e-18
4119703	2		91.7307	0.91658	-0.0378296	228	0.00355902		TGCAGCGACCGATGGTAACTTTTTTCCATTGATCGACACTTAC		999		0	999		0	999		0	999		0	0	999	CM004494.1_chromosome_B4	9524956	1.66125e-14
5852005|F|0--43:A>C	2		92.4041	0.175498	-0.755728	228	0.597804		TGCAGCAGCCATCTCCTTCAAACTTACATGAATCTTCTCCAGAATTGCTGTCTGACCTTCTTCAGCAGC	5852005	1.52834e-30	LFQT01006980.1_Scaffold00416	49515	3.95223e-27		0	999		0	999		0	0	999	LFLV01000470.1scaffold_984.1	34079	3.6593e-29
5859613	2		92.4041	0.571512	-0.242975	228	0.103932		TGCAGACTCTTTACCTTAGCCTTCTTAGTAGCATCCCTCAGAATATGTGCTTCAGCTGTGGCCTCAAAA	5859613	1.97704e-29	LFQT01005367.1_Scaffold00703	34785	5.14883e-21		0	999		0	999		0	0	999	LFLV01001818.1scaffold_1817.1	8871	1.71459e-22
5865796|F|0--11:A>G	2		92.4041	0.857262	-0.0668866	228	0.0104949		TGCAGCATTTGAACCCGGAGCGCGAGATGCCCACGCCCAACCTTGGATCTCTCTTTGCCCAGCACCTGG	5865796	1.52834e-30	CM007196.1_chromosome_B2	28474079	8.49476e-29		0	999		0	999		0	0	999	LFLV01000626.1scaffold_923.1	59282	3.6593e-29
5846176	2		93.7509	0.656349	-0.182865	228	0.0642547		TGCAGTGTCAGTGCCGCTTGTTAC		999		0	999		0	999		0	999		0	0	999		0	999
5851121|F|0--48:A>T	2		93.7509	0.985723	-0.00624529	228	0.000103882		TGCAGATACTTTGCACATCATCATCCCTTTCTCCTCCACAACTACTCAAATCAACCACGTGGAACTCCT	5851121	1.52834e-30	CM007198.1_chromosome_B4	14076473	3.95223e-27	C4	9253943	2.71008e-16	NC_027751.1_chromosome_C4	9253943	2.71193e-16	chrC04_random	1469424	2	2.13372e-19	CM004494.1_chromosome_B4	2173388	1.70251e-27
5832342	2		97.7913	0.96105	-0.0172538	228	0.000773654		TGCAGCGAACCCTCCTTGCAGGTAATAAGTTTATGCACTAGGTAATGTGTGTTACAGCCTTATCTTGTT	5832342	1.52834e-30		0	999	C7	24423036	4.50295e-19	NC_027754.1_chromosome_C7	24423036	4.50602e-19	chrCnn_random	24952905	1	1.64947e-20		0	999
5856253	2		99.1381	0.345124	-0.462025	228	0.289707		TGCAGTCTTGAGATTCCCCTCCACCTCCCCCCACTGACTTTCTCGTCACGGAACAAGCCTAATTACAGA	5856253	1.52834e-30	CM007198.1_chromosome_B4	7680999	1.42147e-26		0	999		0	999		0	0	999	CM004494.1_chromosome_B4	8943178	6.12331e-27
5030579	2		99.1381	0.403427	-0.394235	228	0.226807		TGCAGGGAGAGATTCAGACGGTGCAGAGACTTTTCTCGATGGTGAGACAGATCGGTCTGGAGCCGGATC	5030579	7.11069e-29	CM007187.1_chromosome_A3	21730105	1.83879e-25	C7	24405541	2.06558e-27	NC_027754.1_chromosome_C7	24405541	2.06699e-27	chrA07	11275287	2	3.52031e-27	CM004494.1_chromosome_B4	9482579	3.6593e-29
5864909	2		99.1381	0.415624	-0.381299	228	0.215278		TGCAGAGAGAACATATGTGTTCAATACTCAAGATCCACAAAGCACACTCCTCTCCGTTAC	5864909	6.08414e-24	CM007197.1_chromosome_B3	5860292	1.13875e-21		0	999		0	999		0	0	999	LFLV01001403.1scaffold_30.1	946081	4.93342e-22
5846512	2		99.1381	0.499339	-0.301604	228	0.148184		TGCAGCAGCAGGTGGTGGCGGTGATGGGGCTGGAGCCTCTGAATCGTTAC	5846512	3.55254e-20		0	999		0	999		0	999		0	0	999		0	999
5843695	2		99.1381	0.501704	-0.299552	228	0.146556		TGCAGCTTTATAGTCACTTCACCTTTTTTGTTTTTGTTTTTTTAC		999		0	999		0	999		0	999		0	0	999		0	999
5858133|F|0--5:G>A	2		99.1381	0.716027	-0.145071	228	0.0429402		TGCAGGCCACCAGAGCTATGCTATGTTTTAC	5858133	5.28297e-10		0	999		0	999		0	999		0	0	999		0	999
5834653	2		99.1381	0.855946	-0.0675538	228	0.0106915		TGCAGTGTTGAGATTCCCCTCCACCTCCCCCCCACTGACTTTCTCGTCACGGAACAAGCCTAATTACAG	5834653	1.52834e-30	CM007198.1_chromosome_B4	7680999	3.07695e-23		0	999		0	999		0	0	999	CM004494.1_chromosome_B4	8943178	1.32546e-23
5846369	2		99.1381	0.892382	-0.0494494	228	0.00593788		TGCAGACGCCCAAGGAAGAGGAAGAAGAAGAAGGAGGTGGAGAGTTTGTTAC	5846369	2.92937e-21	CM007198.1_chromosome_B4	7620017	2.47725e-12		0	999		0	999		0	0	999	CM004494.1_chromosome_B4	8885466	2.30934e-19
5860572|F|0--17:T>A	2		99.8115	0.546455	-0.262445	228	0.118079		TGCAGCTCCAGACAACATGCGCAGGTTTCTCATAATTTAGAAGCCTATATTTTTTGCATCGTTCTTACA	5860572	1.52834e-30	CM007198.1_chromosome_B4	7382109	1.09887e-27		0	999		0	999		0	0	999	CM004494.1_chromosome_B4	8660456	1.02465e-24
5858428	2		100.148	0.500276	-0.30079	228	0.147537		TGCAGTAGCGGTAACTGCTGCATGGTCGTGGAAGTACTGGACCTCGAGCTGTTAC	5858428	6.88654e-23	CM007198.1_chromosome_B4	7614011	2.7331e-17		0	999		0	999		0	0	999	CM004494.1_chromosome_B4	8883809	1.18955e-17
5832524	2		100.148	0.857229	-0.0669033	228	0.0104998		TGCAGCTAAAGCTGGTTCAAGTGATAAAACAGCTGCAAGAATAGCTATGCACATGTCTGGAGATAGAGC	5832524	1.52834e-30	CM007190.1_chromosome_A6	21970258	1.83879e-25	C3	34857938	2.08025e-22	NC_027750.1_chromosome_C3	34857938	2.08167e-22	chrC03	33526067	2	3.5453e-22	CM004494.1_chromosome_B4	8879292	1.70251e-27
5846199	2		100.485	0.735666	-0.133319	228	0.0369815		TGCAGTTATGGTACATGAGCCATCAGATGTGGTTAGGTTAC	5846199	2.50443e-15		0	999		0	999		0	999		0	0	999		0	999
5832278	2		100.485	0.770288	-0.113347	228	0.0276641		TGCAGCCTATTCTTCAAACAAGAAATGGAGCTTTCGTTGATTGGACTTCAAAATGCAGGAAAGACATCA	5832278	1.52834e-30	CM007198.1_chromosome_B4	7603737	1.83879e-25		0	999		0	999		0	0	999	CM004494.1_chromosome_B4	8874277	7.921e-26
5837272	2		101.158	0.0240907	-1.61815	228	1.6693		TGCAGCATCTCGTATGTTGTTCTTGTTTGTATTCGATCATATTTGATTTCGCAATGGATTTGAACTGAT	5837272	1.52834e-30		0	999		0	999		0	999		0	0	999	CM004494.1_chromosome_B4	8648124	6.12331e-27
5846674	2		101.158	0.0544963	-1.26363	228	1.20931		TGCAGTAAAGGAAGTGTGGAAAGAAAATAATGCATGCCAAAGCTTTCATATACTATATTAC	5846674	3.72679e-26	CM007198.1_chromosome_B4	7339919	5.44944e-20		0	999		0	999		0	0	999	CM004494.1_chromosome_B4	8616235	6.55906e-21
5846513	2		101.158	0.161483	-0.791874	228	0.638677		TGCAGCAGCATTGCACTGCTTCCATGCTGAGACAGATAAACTGTTCTCAAAGAAGGTTAC	5846513	1.3077e-25		0	999		0	999		0	999		0	0	999		0	999
5862336	2		101.158	0.212468	-0.672706	228	0.506022		TGCAGCTCCAGCACCGAGAACAATGGAGAAACCGAAGATGAGAGCTTAC	5862336	1.23513e-19	CM007198.1_chromosome_B4	7426020	4.7329e-14		0	999		0	999		0	0	999	CM004494.1_chromosome_B4	8703578	9.59315e-18
5863202	2		101.158	0.288148	-0.540384	228	0.366916		TGCAGCCTTGGAGAAAATGTTCACCACTTTCACTCTTGGTGAGATGTTTCTGTGATTGCTAGTGATTTA	5863202	1.52834e-30	CM007198.1_chromosome_B4	7425438	8.49476e-29	C3	35148271	2.06558e-27	NC_027750.1_chromosome_C3	35148271	2.06699e-27	chrCnn_random	12009517	8	1.63784e-25	CM004494.1_chromosome_B4	8702996	6.12331e-27
5832676	2		101.158	0.412378	-0.384704	228	0.218297		TGCAGCTCCTCTTCCGGTGACATTTCGAAAACTTATGGTTGAGATTCAACTGCAAAAGCACACATAAAA	5832676	1.52834e-30	CM007198.1_chromosome_B4	7424574	8.49476e-29		0	999		0	999		0	0	999		0	999
5857652|F|0--18:G>A	2		101.158	0.483581	-0.315531	228	0.159379		TGCAGCCAAGTAATTACCGGATATAGAATCATTTTCTTGAGCTTGATTTAC	5857652	1.02066e-20	CM007198.1_chromosome_B4	7425139	8.51931e-17		0	999		0	999		0	0	999	CM004494.1_chromosome_B4	8702697	8.00924e-19
5862336|F|0--15:G>T	2		101.158	0.684572	-0.164581	228	0.0535527		TGCAGCTCCAGCACCGAGAACAATGGAGAAACCGAAGATGAGAGCTTAC	5862336	1.23513e-19	CM007198.1_chromosome_B4	7426020	4.7329e-14		0	999		0	999		0	0	999	CM004494.1_chromosome_B4	8703578	9.59315e-18
5860132|F|0--15:G>A	2		101.158	0.745934	-0.127299	228	0.0340626		TGCAGCACCTCGTATGTTCTCTTCTTCCAGTGTATTCGTTTTATGATTTTGAAACTATATGTTAC	5860132	2.44442e-28		0	999		0	999		0	999		0	0	999	CM004494.1_chromosome_B4	8644118	9.33566e-25
5835206	2		102.168	0.574818	-0.240469	228	0.102154		TGCAGAAAAATCCTTTGCTTCATAACAGCTCATATAGAACTCTTCTTCTCAAAATCACAGAGCTTTACA	5835206	1.52834e-30	CM007189.1_chromosome_A5	16945284	1.09887e-27		0	999		0	999	chrA04_random	1221481	3	9.92723e-18		0	999
5845781	2		102.168	0.602899	-0.219756	228	0.087849		TGCAGCTGAACCAAACCGAACCAAACCGGTATTAC	5845781	4.20948e-12		0	999		0	999		0	999		0	0	999		0	999
5858128|F|0--19:T>C	2		102.168	0.62383	-0.204934	228	0.0780655		TGCAGGCAGCTGCTCGCTATCTTAC		999		0	999		0	999		0	999		0	0	999		0	999
5843522	2		102.505	0.0479864	-1.31888	228	1.27959		TGCAGCTGAACCAAACCGGACCAAACCGGTAATAATATCAACCCGTGAATCGAATTAC	5843522	1.60704e-24	LFQT01002362.1_Scaffold00381	50984	1.38889e-20		0	999		0	999		0	0	999	CM004494.1_chromosome_B4	8343056	1.29547e-22
5833099	2		102.505	0.0763074	-1.11743	228	1.02633		TGCAGGAAGTCCAGATGCAGTCAAGGATCCCATCAACGTCCACTCTTTTGCTAATCCCTTCAAACTGCC	5833099	1.52834e-30	CM007198.1_chromosome_B4	7025248	8.49476e-29	C3	35830335	2.08025e-22	NC_027750.1_chromosome_C3	35830335	2.08167e-22	chrC03	34215751	2	3.5453e-22	CM004494.1_chromosome_B4	8311467	3.6593e-29
5835990	2		102.842	0.299822	-0.523137	228	0.349552		TGCAGCGAGAGAACGAGTATATCATCAGGTCTGAGACATGTCATCAAGCAATAATCAGTGGTTAC	5835990	2.44442e-28	CM007189.1_chromosome_A5	16946362	4.64776e-26		0	999		0	999		0	0	999		0	999
5850800|F|0--56:C>G	2		102.842	0.567734	-0.245855	228	0.105988		TGCAGAGGAATCTGGGACCGGTTGGGACAGGTTCGAGACATCATTAGATTACATTACCATCAGTTGGTG	5850800	1.52834e-30	CM007198.1_chromosome_B4	7303668	3.95223e-27		0	999		0	999		0	0	999	CM004494.1_chromosome_B4	8572812	1.70251e-27
5842451	2		102.842	0.83131	-0.080237	228	0.014722		TGCAGATATCAGAACTCAATACCTAAGCACATAGCAACTTAC	5842451	7.29484e-16		0	999		0	999		0	999		0	0	999		0	999
5847712	2		105.872	0.241507	-0.617069	228	0.446352		TGCAGCAACAAAACAAATAACATTTGATCGCAGATTTAC	5847712	3.1445e-14		0	999		0	999		0	999		0	0	999		0	999
5846026	2		105.872	0.139842	-0.854364	228	0.710511		TGCAGTAAGCAATGTGAGAAACGTTTAC	5846026	1.84344e-08		0	999		0	999		0	999		0	0	999		0	999
5854833	2		106.546	0.728765	-0.137413	228	0.0390185		TGCAGTCCTTGAAGAACCTCTGCCAGCTTGAGCTAGAAGAAACTGGTCAACAAAACGATTACATCATTC	5854833	1.52834e-30	CM007198.1_chromosome_B4	6203676	8.49476e-29		0	999		0	999		0	0	999	CM004494.1_chromosome_B4	7725128	7.97723e-21
5847700	2		106.55	0.11059	-0.956284	228	0.830512		TGCAGATAAATAAGGCAGACAAAAACTCACCCTGATGTGTTAC	5847700	2.12043e-16		0	999		0	999		0	999		0	0	999	CM004494.1_chromosome_B4	7726059	1.66125e-14
5836570	2		107.567	0.191302	-0.718279	228	0.556025		TGCAGTATATCACCCTCTTTGGTTAGACAATACGGAAAATTGTTATAGCAATGGAAAGTTCTTGTAACC	5836570	1.52834e-30	CM007198.1_chromosome_B4	5892702	8.49476e-29		0	999		0	999		0	0	999		0	999
5859829|F|0--6:A>T	2		107.567	0.705522	-0.151489	228	0.0463352		TGCAGAAAATCTTTGATAAGAATTATTGTACATATCAGGCTAGTAGTTTGAGCTGAACCTCAACGCGGT	5859829	1.52834e-30	CM007198.1_chromosome_B4	5901227	3.95223e-27		0	999		0	999		0	0	999	CM004494.1_chromosome_B4	7453281	1.70251e-27
5852177	2		109.239	0.243473	-0.61355	228	0.442631		TGCAGCATTCCTGGCTACAATAGGATTTCCTGCAATAGAGATAACAGATTACAAACTATATTTGGAGAA	5852177	7.11069e-29		0	999		0	999		0	999		0	0	999	CM004494.1_chromosome_B4	7423985	1.70251e-27
5833698	2		109.239	0.575618	-0.239866	228	0.101727		TGCAGGTCCGGTCCATGGTCATACAAGACTAAGCACTAATGTTACATGTTACAACAGAGGAGATTCTCT	5833698	1.52834e-30		0	999		0	999		0	999		0	0	999	CM004494.1_chromosome_B4	7415281	7.921e-26
5841368	2		109.576	0.355375	-0.449314	228	0.277614		TGCAGAAAAAACAATTGAAATGGAGTTATTAC	5841368	1.59127e-10		0	999		0	999		0	999		0	0	999	CM004494.1_chromosome_B4	7354113	1.08212e-08
5862806	2		110.586	0.314514	-0.502359	228	0.328902		TGCAGAAATTACTGAGAAAACCCAATTCGAGAAACCCATTTTCTCTGATTCCACTGATTCTCAAGTAAG	5862806	1.52834e-30	CM007198.1_chromosome_B4	5706425	1.42147e-26		0	999		0	999		0	0	999	CM004494.1_chromosome_B4	7195618	1.31612e-28
5861783	2		110.586	0.328015	-0.484107	228	0.311014		TGCAGCCTTTGCCACAACATTCAGAGGAATTCCAGAAGTGCCGATCTCTTCCATGGCTTCTTGAACCTG	5861783	1.52834e-30	CM007198.1_chromosome_B4	5664209	3.95223e-27	C3	37832344	7.42916e-27	NC_027750.1_chromosome_C3	37832344	7.43423e-27	chrAnn_random	27007409	2	1.26613e-26	CM004494.1_chromosome_B4	7156631	1.70251e-27
5842131	2		110.586	0.436755	-0.359762	228	0.196455		TGCAGAGACTGTGAGTGGATAGATTTGGCATTTTTTTAC	5842131	3.1445e-14		0	999		0	999		0	999		0	0	999	CM004494.1_chromosome_B4	7196143	1.03468e-10
5862804|F|0--54:C>T	2		110.586	0.605343	-0.217999	228	0.0866688		TGCAGAAATTACTGAGAAAACCCAATTCGAGAAACCCATTTTCTCTGATTCCACCGATTCTCAAGTAAA	5862804	1.52834e-30	CM007198.1_chromosome_B4	5706425	8.49476e-29		0	999		0	999		0	0	999	CM004494.1_chromosome_B4	7195618	1.70251e-27
5857570	2		110.586	0.764875	-0.11641	228	0.0290236		TGCAGCAGCTTCTCATCCTCTTTGCTCAGATTCAAGTAAGTCTCGTGTCGTTTTAC	5857570	1.96942e-23	CM007198.1_chromosome_B4	5656945	3.62758e-21	C3	37857872	1.92717e-16	NC_027750.1_chromosome_C3	37857872	1.92848e-16	chrC03	36228185	2	3.25408e-16	CM004494.1_chromosome_B4	7149468	1.57722e-21
5846393	2		110.586	0.780039	-0.107884	228	0.0253042		TGCAGAGACTGTGAGTGGATTGATTTGTCTTTTTTTTTTAC	5846393	2.50443e-15	CM007198.1_chromosome_B4	5706950	4.33674e-13		0	999		0	999		0	0	999		0	999
5832085	2		110.586	0.968923	-0.0137109	228	0.000492385		TGCAGCATGTTCCAAACGTCTTTGTCTTTCCGTCCACTTAGAGGTTGTATCCTTGAGTTGCTAGTGTCT	5832085	1.52834e-30		0	999		0	999		0	999		0	0	999	LFLV01000924.1scaffold_88.1	433516	3.68528e-24
5859821	2		110.923	0.196495	-0.706647	228	0.543172		TGCAGAGTTTTTGTTACAGAAAGTAAGTACAAAGACACCAAACACAAACTCTCTAATACCAAACTGTTT	5859821	1.52834e-30	CM007190.1_chromosome_A6	17893386	6.66043e-20	C3	37859304	9.67846e-21	NC_027750.1_chromosome_C3	37859304	9.68506e-21	chrC03	36229617	2	1.64947e-20		0	999
5859820|F|0--23:A>T	2		110.923	0.907327	-0.0422362	228	0.00439617		TGCAGAGTTTTTGTTACAGAAAGAAAGTACAAAGACACCAAACACAAACTCTCTAATACCAAACTGTTA	5859820	1.52834e-30	CM007190.1_chromosome_A6	17893386	3.0988e-18	C3	37859304	1.61955e-18	NC_027750.1_chromosome_C3	37859304	1.62065e-18	chrC03	36229617	2	2.76014e-18		0	999
5862135	2		111.259	0.155961	-0.806984	228	0.655915		TGCAGATGAATTGACAAAAGAAATGTGGATGCTTTATAGTTTGCATTGTCAATTTTAC	5862135	1.60704e-24	CM007198.1_chromosome_B4	5284447	6.46186e-19		0	999		0	999		0	0	999	CM004494.1_chromosome_B4	6827100	1.29547e-22
5849651	2		111.259	0.437531	-0.358991	228	0.19579		TGCAGAAATTGAACCTGGCAATGGAAGGAAGAAGAGGAAGACGGTGACGGCGAAACAAAAAGACGGAGC	5849651	1.52834e-30	CM007198.1_chromosome_B4	5257069	8.49476e-29		0	999		0	999		0	0	999	CM004494.1_chromosome_B4	6798541	3.6593e-29
5862133|F|0--50:C>A	2		111.259	0.438361	-0.358168	228	0.195081		TGCAGATGAATTGACAAAAGAAATGTGGATGCTTTATAGTTTGCATTGTCCGTTTTAC	5862133	1.60704e-24	CM007198.1_chromosome_B4	5284447	6.46186e-19		0	999		0	999		0	0	999	CM004494.1_chromosome_B4	6827100	2.8042e-19
5835727	2		111.259	0.531666	-0.274361	228	0.127015		TGCAGATTCTCTGTTCGTTCAATTAGGTTTTTACTCTTTTACCAATATGGTTCAATTCGTAAGGTTTTC	5835727	1.52834e-30		0	999		0	999		0	999		0	0	999	CM004494.1_chromosome_B4	6798475	3.6593e-29
5850851|F|0--37:G>A	2		111.259	0.571683	-0.242845	228	0.103839		TGCAGAGGCTTTGAAGAGTTATCCATATCAAATGAGGGCAGGGAGTGCGCAGATGCATGAGATGGAACA	5850851	1.52834e-30	CM007198.1_chromosome_B4	5263138	3.95223e-27	C2	51074927	4.53492e-14	NC_027749.1_chromosome_C2	51074927	4.53801e-14	chrA06	14934780	3	7.72871e-14	CM004494.1_chromosome_B4	6805104	1.72677e-17
5862133	2		111.259	0.623088	-0.205451	228	0.0784		TGCAGATGAATTGACAAAAGAAATGTGGATGCTTTATAGTTTGCATTGTCCGTTTTAC	5862133	1.60704e-24	CM007198.1_chromosome_B4	5284447	6.46186e-19		0	999		0	999		0	0	999	CM004494.1_chromosome_B4	6827100	2.8042e-19
5849651|F|0--55:C>A	2		111.259	0.835445	-0.078082	228	0.0139986		TGCAGAAATTGAACCTGGCAATGGAAGGAAGAAGAGGAAGACGGTGACGGCGAAACAAAAAGACGGAGC	5849651	1.52834e-30	CM007198.1_chromosome_B4	5257069	8.49476e-29		0	999		0	999		0	0	999	CM004494.1_chromosome_B4	6798541	3.6593e-29
5841895	2		111.259	0.896255	-0.0475682	228	0.00551569		TGCAGACAACCTCGGAGATCTATTAC		999		0	999		0	999		0	999		0	0	999		0	999
5845349	2		111.936	0.471905	-0.326146	228	0.168071		TGCAGAAGCCACCATAGCTCTTGGTTTAC	5845349	5.69496e-09		0	999		0	999		0	999		0	0	999		0	999
5843149	2		111.936	0.869343	-0.060809	228	0.00877805		TGCAGCCACCAAATTGACCTGCCTCTGATTCAGATCCTCTTGTGTTAC	5843149	4.28913e-19		0	999		0	999		0	999		0	0	999		0	999
19818964	2		112.269	0.411187	-0.385961	228	0.219414		TGCAGGTTGAATTTTTCTGTAATAATCATACCTTAC	19818964	1.24354e-12		0	999		0	999		0	999		0	0	999		0	999
5858159|F|0--6:C>T	2		112.269	0.759399	-0.11953	228	0.030435		TGCAGGCTAAATTTTTCTGTAATAATCATACCTTAC	5858159	1.24354e-12		0	999		0	999		0	999		0	0	999	CM004494.1_chromosome_B4	6924533	8.40674e-11
5858159	2		112.269	0.961253	-0.0171623	228	0.000765618		TGCAGGCTAAATTTTTCTGTAATAATCATACCTTAC	5858159	1.24354e-12		0	999		0	999		0	999		0	0	999	CM004494.1_chromosome_B4	6924533	8.40674e-11
5845129	2		115.998	0.194873	-0.710248	228	0.547144		TGCAGTTTCATAAAACGAATAATTTCTTTTTAC	5845129	4.76465e-11	CM007198.1_chromosome_B4	4710578	7.14322e-09		0	999		0	999		0	0	999		0	999
3079653	2		115.998	0.609643	-0.214924	228	0.0846171		TGCAGCACTTTTGGCCCTGAGGTTAGTAGTAATCATGCTTTCTTTCTCAGTTTCTAAATCCTTAC	3079653	1.13728e-26	CM007198.1_chromosome_B4	4457839	4.64776e-26	C4	8536213	4.07376e-24	NC_027751.1_chromosome_C4	8536213	4.07654e-24	chrA05	4896756	2	1.92607e-24		0	999
5846428	2		116.338	0.366636	-0.435765	228	0.264872		TGCAGATAACCCTAAACTCTCTTAGAGATTAC	5846428	1.59127e-10		0	999		0	999		0	999		0	0	999		0	999
5842356	2		116.677	0.929986	-0.0315235	228	0.00250429		TGCAGAGTTTCGAGAAAACAATGTTAGTTCATCTTAC	5842356	3.6609e-13	CM007198.1_chromosome_B4	4702744	1.20123e-07		0	999		0	999		0	0	999		0	999
5859077	2		117.014	0.0933796	-1.02975	228	0.918934		TGCAGGATCAGAATTTTTGGTTGCCTGCATAGTTTTAC		999		0	999		0	999		0	999		0	0	999	CM004494.1_chromosome_B4	6143369	7.49863e-12
5849593	2		117.014	0.295046	-0.53011	228	0.356549		TGCAGAAAGTCCCTTCTTTTCTTGAGTGGACAGCTTTCTGTTCATTTCAGAAATCAAAAGAAAATAAGA	5849593	1.52834e-30	CM007198.1_chromosome_B4	4500378	8.49476e-29		0	999		0	999	chrA05	4944725	1	3.5453e-22	CM004494.1_chromosome_B4	6068650	3.6593e-29
5838797	2		117.014	0.311986	-0.505864	228	0.332365		TGCAGTATCTTGACCGCACCGAGGTTGCCACGTGATAGATTGTCCTGCCAATGAAGAATATGATGAAAC	5838797	1.52834e-30	CM007189.1_chromosome_A5	5103166	1.43157e-21	C4	8623008	1.60813e-23	NC_027751.1_chromosome_C4	8623008	1.60923e-23	chrCnn_random	21158906	1	2.74068e-23	CM004494.1_chromosome_B4	6084589	1.72677e-17
5852975	2		117.014	0.442984	-0.353612	228	0.191168		TGCAGCTCTCAAGGCTCAGGTTTGTGCTTCTCTCTGTTGTTCTTTTACAACATCCCCTTGTTATGATGA	5852975	1.52834e-30	CM007198.1_chromosome_B4	4379152	8.55507e-24		0	999		0	999		0	0	999	CM004494.1_chromosome_B4	5971413	4.73361e-28
5849592|F|0--50:T>A	2		117.014	0.473208	-0.324948	228	0.167083		TGCAGAAAGTCCCTTCTTTTCTTGAGTGGACAGCTTTCTGTTCATTTCAGTAATCAAACGAAAATAAGA	5849592	1.52834e-30	CM007198.1_chromosome_B4	4500378	1.83879e-25		0	999		0	999		0	0	999	CM004494.1_chromosome_B4	6068650	7.921e-26
5834474	2		117.014	0.594638	-0.225747	228	0.0919131		TGCAGTGCAGCCATCACCAATGGTGAACTCGCATGAAATCGAATCTCCCTGTAGAGAGCAAGAACTTGT	5834474	1.52834e-30	CM007198.1_chromosome_B4	4456829	8.49476e-29	C4	8535180	1.25199e-19	NC_027751.1_chromosome_C4	8535180	1.25284e-19	chrC04	7903028	2	2.13372e-19	CM004494.1_chromosome_B4	6028749	3.6593e-29
5851329|F|0--48:T>A	2		117.014	0.712655	-0.147121	228	0.0440141		TGCAGATGAATGCAAAAAAAGTTAGTATGAGACATCTTCATGTTGGACTGTGATTTATAGCTGTTTGGC	5851329	1.52834e-30		0	999		0	999		0	999		0	0	999	CM004494.1_chromosome_B4	6144751	2.8489e-25
5852974|F|0--31:G>C	2		117.014	0.751857	-0.123865	228	0.0324392		TGCAGCTCTCAAGGCTCAGGTTTGTGCTTCTGTCCGTTGTTCTTTTACAGCATCCCCTTGTTATGATGA	5852974	1.52834e-30	CM007198.1_chromosome_B4	4379152	8.49476e-29		0	999		0	999		0	0	999	CM004494.1_chromosome_B4	5971413	4.76721e-23
5831849	2		117.014	0.874467	-0.0582565	228	0.00809729		TGCAGCACTTTTGGCCCTGAGGTTAGCAGTAATCATGCTTTCTTCTCAGTTTCTAAATCCTTAC	5831849	8.59634e-28		0	999		0	999		0	999		0	0	999	CM004494.1_chromosome_B4	6029762	7.04089e-26
5849592	2		117.351	0.69048	-0.160849	228	0.0514563		TGCAGAAAGTCCCTTCTTTTCTTGAGTGGACAGCTTTCTGTTCATTTCAGTAATCAAACGAAAATAAGA	5849592	1.52834e-30	CM007198.1_chromosome_B4	4500378	1.83879e-25		0	999		0	999		0	0	999	CM004494.1_chromosome_B4	6068650	7.921e-26
5834809	2		117.351	0.767926	-0.114681	228	0.028253		TGCAGTTCTTGAAAGAAGGCTCAAAAAGGCTGAGATTGTGGGCACAAATGTCAAGAAGATGAAGAATCT	5834809	1.52834e-30	CM007198.1_chromosome_B4	4465185	1.44173e-16		0	999		0	999		0	0	999	CM004494.1_chromosome_B4	6037701	3.6593e-29
5857284	2		117.687	0.185288	-0.732152	228	0.571432		TGCAGATGATGCGTGTGAGAGGTTAC		999		0	999		0	999		0	999		0	0	999		0	999
5857284|F|0--7:G>A	2		117.687	0.537171	-0.269887	228	0.123636		TGCAGATGATGCGTGTGAGAGGTTAC		999		0	999		0	999		0	999		0	0	999		0	999
5835380	2		117.687	0.85254	-0.0692852	228	0.011209		TGCAGAAGTTTCAGCTCCCAGCATCAGCAAGCAGGTGGAAGAGGAAGCTGTACTACTTTCTCCGTAACA	5835380	1.52834e-30	CM007198.1_chromosome_B4	4312680	1.83879e-25	C4	8277516	2.08025e-22	NC_027751.1_chromosome_C4	8277516	2.08167e-22	chrA05_random	415157	2	3.5453e-22	CM004494.1_chromosome_B4	5901681	3.6593e-29
5843642	2		117.687	0.867062	-0.06195	228	0.00909012		TGCAGCTTCATGTCACAAGCTGATTAC		999		0	999		0	999		0	999		0	0	999		0	999
5857283	2		117.687	0.876402	-0.0572967	228	0.0078476		TGCAGATAATGCGTGTGAAAGGTTAC		999		0	999		0	999		0	999		0	0	999		0	999
5852974	2		117.687	0.99242	-0.00330466	228	2.93e-05		TGCAGCTCTCAAGGCTCAGGTTTGTGCTTCTGTCCGTTGTTCTTTTACAGCATCCCCTTGTTATGATGA	5852974	1.52834e-30	CM007198.1_chromosome_B4	4379152	8.49476e-29		0	999		0	999		0	0	999	CM004494.1_chromosome_B4	5971413	4.76721e-23
5857224	2		120.381	0.456773	-0.3403	228	0.179868		TGCAGATCACTCACGCGGCGATCTCCACCGTTGAGAACAGCTCGGGAGCTGTTAC	5857224	6.88654e-23		0	999		0	999		0	999		0	0	999		0	999
5857224|F|0--19:G>T	2		120.381	0.561095	-0.250964	228	0.109667		TGCAGATCACTCACGCGGCGATCTCCACCGTTGAGAACAGCTCGGGAGCTGTTAC	5857224	6.88654e-23		0	999		0	999		0	999		0	0	999		0	999
5857223	2		120.381	0.593792	-0.226366	228	0.0923359		TGCAGATCACTCACGCGGCTATCTCCACCGTCGAGAACAGCTCGGGAGCTGTTAC	5857223	6.88654e-23	CM007189.1_chromosome_A5	9615970	1.26262e-20	C4	49373198	6.76239e-11	NC_027751.1_chromosome_C4	49373198	6.767e-11		0	0	999	CM004494.1_chromosome_B4	5426559	5.49543e-21
5842075	2		120.381	0.77327	-0.111669	228	0.0269304		TGCAGAGAAACAAACAGAGCAGGAGCTCGAAATTGAGAGTATAGTCCTTGCGTTTAC	5842075	5.62783e-24	CM007189.1_chromosome_A5	9612719	1.04114e-21	C4	7295188	5.56492e-12	NC_027751.1_chromosome_C4	7295188	5.56871e-12		0	0	999	CM004494.1_chromosome_B4	5424089	9.78907e-19
5845432	2		120.381	0.886782	-0.0521833	228	0.00657624		TGCAGAGAAACAAAACAGAGCAGGACCTCCAAGTTGAGAGCATAGTCCTTGCGTTTAC	5845432	1.60704e-24		0	999		0	999		0	999		0	0	999		0	999
5842021	2		120.718	0.794784	-0.0997507	228	0.0219498		TGCAGACTAAAAAATAATAGCTTGAGGGGTGTTATTGGACCGATGACTTAC	5842021	1.02066e-20	CM007189.1_chromosome_A5	9604920	1.83111e-18		0	999		0	999		0	0	999		0	999
5856618	2		121.054	0.493619	-0.306608	228	0.152178		TGCAGAAAGACATCCAATGAATGCATTTATATACGCTTTAC	5856618	2.50443e-15		0	999		0	999		0	999		0	0	999		0	999
5856617	2		121.054	0.524731	-0.280063	228	0.131363		TGCAGAACGACATCCAATGAATGCATTCATATACACTTTAC	5856617	2.50443e-15	CM007189.1_chromosome_A5	9502483	4.33674e-13		0	999		0	999		0	0	999	CM004494.1_chromosome_B4	5333389	1.93407e-13
5856617|F|0--7:C>A	2		121.054	0.538363	-0.268925	228	0.122913		TGCAGAACGACATCCAATGAATGCATTCATATACACTTTAC	5856617	2.50443e-15	CM007189.1_chromosome_A5	9502483	4.33674e-13		0	999		0	999		0	0	999	CM004494.1_chromosome_B4	5333389	1.93407e-13
5858644|F|0--28:G>A	2		125.432	0.329354	-0.482336	228	0.309292		TGCAGTGGCAACTCATGCTGATAACTGTGGCCGTCGGAAGTTAGCTGCGATGCTAGTTAC	5858644	1.3077e-25		0	999		0	999		0	999		0	0	999	CM004494.1_chromosome_B4	4881593	4.93342e-22
5858645	2		125.432	0.345964	-0.46097	228	0.288698		TGCAGTGGCAACTCATGCTGATAACTGTAGCCGTCGGAAGTTAGCTGCGATGCCAGTTAC	5858645	1.3077e-25		0	999		0	999		0	999		0	0	999	CM004494.1_chromosome_B4	4881593	4.93342e-22
5858644	2		125.6	0.706114	-0.151125	228	0.04614		TGCAGTGGCAACTCATGCTGATAACTGTGGCCGTCGGAAGTTAGCTGCGATGCTAGTTAC	5858644	1.3077e-25		0	999		0	999		0	999		0	0	999	CM004494.1_chromosome_B4	4881593	4.93342e-22
5857592|F|0--27:T>C	2		125.768	0.383037	-0.41676	228	0.24726		TGCAGCATAAGATATTCCTCTACATAGTTGAAGCTGAAATTCGATGTTAC	5857592	3.55254e-20		0	999		0	999		0	999		0	0	999	CM004494.1_chromosome_B4	4881546	2.77394e-18
5845487	2		126.787	0.996269	-0.00162353	228	7.09e-06		TGCAGAGGCAGTTCAGTCATGGGCATGACAGTCCAAGGTTTAC	5845487	2.12043e-16	CM007198.1_chromosome_B4	3412056	3.74692e-14		0	999		0	999		0	0	999	CM004494.1_chromosome_B4	4517823	7.72906e-13
5838844	2		127.115	0.199688	-0.699647	228	0.535466		TGCAGTTGTTCTTGAGTTAGCTGGGAAAACGCCAGCAAAGATTTGAAAATGAAGAGAATAAGACTGAGG	5838844	1.52834e-30		0	999		0	999		0	999		0	0	999		0	999
5845135	2		127.115	0.208086	-0.681757	228	0.515876		TGCAGTTTCCAAAACACAATAGAGTTTTTAC	5845135	5.28297e-10		0	999		0	999		0	999		0	0	999		0	999
5860537	2		127.115	0.423282	-0.37337	228	0.208293		TGCAGCTATACTCGTCTGCTCCTACGGAGCCGTATCTGTCATCTCAGAACTACGGTGAAATATTCAACA	5860537	1.52834e-30		0	999		0	999		0	999		0	0	999	CM004494.1_chromosome_B4	4492381	3.68528e-24
5847511	2		127.115	0.511193	-0.291415	228	0.14015		TGCAGTTTCCAAAACACAATCGAGTTTCTTAC	5847511	1.59127e-10		0	999		0	999		0	999		0	0	999		0	999
5860538	2		127.115	0.579165	-0.237198	228	0.0998477		TGCAGCTATACTCGTCCGCTCCTACGGAGCCGTATCTGTCATCTCAAAACTATGGTGAAATATTCAACA	5860538	1.52834e-30	CM007191.1_chromosome_A7	8365959	6.70772e-15	C4	46559318	4.53492e-14	NC_027751.1_chromosome_C4	46559318	4.53801e-14		0	0	999		0	999
5838915	2		127.115	0.588938	-0.22993	228	0.0947863		TGCAGAGTTTGAGAATTTAGTAAGAAGAGAAGAAACCAAAAGATCTATAGTACCGAATCTTAC	5838915	3.02152e-27		0	999		0	999		0	999		0	0	999		0	999
5864372	2		127.115	0.64855	-0.188057	228	0.0674188		TGCAGGTTGGAGCAATTATCTCTGGTATTCAGCCTGGGCTAACTATGGTGGTTGGTCCACCGGGTACCG	5864372	1.52834e-30	CM007198.1_chromosome_B4	3382826	3.95223e-27	C4	5533999	9.61023e-26	NC_027751.1_chromosome_C4	5533999	9.61678e-26	chrC04	4788001	2	1.63784e-25	CM004494.1_chromosome_B4	4506642	1.70251e-27
5841373	2		127.115	0.690031	-0.161132	228	0.0516139		TGCAGAAAAAAGAAGCAAGCAAGCTAATTATAACTCTTTCATTAC	5841373	1.78173e-17		0	999		0	999		0	999		0	0	999		0	999
3097491|F|0--14:A>C	2		127.115	0.696874	-0.156845	228	0.0492415		TGCAGTCACAGATGATGGCTTCTCTTCTCCAATATTAGGCTGTTTCACCTGAGCGATTTTGAATCCATT	3097491	7.11069e-29	LFQT01008015.1_Scaffold08787	644	1.83879e-25	C4	5532571	2.06558e-27	NC_027751.1_chromosome_C4	5532571	2.06699e-27	chrC04	4786579	3	3.52031e-27	CM004494.1_chromosome_B4	4505191	3.6593e-29
5842205	2		127.115	0.762276	-0.117888	228	0.0296889		TGCAGAGCATAATCAAACAATTGCTGTTCTTGTGTATTAC	5842205	8.57861e-15	CM007198.1_chromosome_B4	3347889	1.46802e-12		0	999		0	999		0	0	999	CM004494.1_chromosome_B4	4474414	6.5697e-13
5860537|F|0--16:T>C	2		127.115	0.924044	-0.0343073	228	0.00294877		TGCAGCTATACTCGTCTGCTCCTACGGAGCCGTATCTGTCATCTCAGAACTACGGTGAAATATTCAACA	5860537	1.52834e-30		0	999		0	999		0	999		0	0	999	CM004494.1_chromosome_B4	4492381	3.68528e-24
5864372|F|0--13:A>G	2		127.115	0.938802	-0.0274259	228	0.00191215		TGCAGGTTGGAGCAATTATCTCTGGTATTCAGCCTGGGCTAACTATGGTGGTTGGTCCACCGGGTACCG	5864372	1.52834e-30	CM007198.1_chromosome_B4	3382826	3.95223e-27	C4	5533999	9.61023e-26	NC_027751.1_chromosome_C4	5533999	9.61678e-26	chrC04	4788001	2	1.63784e-25	CM004494.1_chromosome_B4	4506642	1.70251e-27
[truncated: 4,849 more rows]
[truncated: 12 more columns]
